# Supplementary material for: Machine learning-based tumor associated macrophages polarity signature predicts prognosis and treatment response in hepatocellular carcinoma
Source: Front Immunol. 2025 Nov 5;16:1663519. doi: 10.3389/fimmu.2025.1663519 (PMC12627068; doi:10.3389/fimmu.2025.1663519)
Supplement: Supplementary file 1 [file Table1.xlsx]

## Sheet: Table S1
Table S1 Gene sets of CXCL9/SPP1 Macrophages polarity
cg	gene	cor	rank	S	PCER	FDR	FWER
Fibroblasts	ZSWIM7	-0.448659	1803	3.20399	0.006	0.0409213	1
Monocytes	ZRSR2	0.488836	804	3.66455	0.003	0.0197508	0.999
Mast_cells	ZRANB2	0.595951	356	4.12107	0.001	0.00871541	0.886
Macrophages	ZPR1	0.412789	2246	3.07278	0.008	0.0493587	1
Macrophages	ZNFX1	0.50333	555	3.87629	0.002	0.0135672	0.986
B_cells	ZNF830	0.460623	1628	3.26627	0.005	0.0371449	1
Macrophages	ZNF800	0.452403	1257	3.41403	0.004	0.0297246	1
Tumor	ZNF770	-0.442993	1938	3.15708	0.008	0.0441503	1
B_cells	ZNF75A	0.51255	737	3.71271	0.003	0.018258	0.997
B_cells	ZNF720	0.480358	1229	3.43249	0.004	0.0285954	1
Macrophages	ZNF672	0.420388	2013	3.13714	0.008	0.0451549	1
B_cells	ZNF638	0.447857	1929	3.16079	0.008	0.0438801	1
Endothelial_cells	ZNF512B	-0.519082	526	3.90039	0.002	0.0130928	0.981
B_cells	ZNF512	0.485908	1132	3.47996	0.004	0.0264873	1
B_cells	ZNF493	0.579032	245	4.3345	0.001	0.00580364	0.689
Fibroblasts	ZNF460	0.454267	1672	3.25071	0.006	0.0380409	1
B_cells	ZNF430	0.571631	270	4.26196	0.001	0.00692255	0.772
Macrophages	ZNF395	-0.6042	72	4.89816	0	0.00205924	0.162
Fibroblasts	ZNF394	0.448716	1801	3.20447	0.006	0.0408907	1
Monocytes	ZNF385A	0.425642	2081	3.11632	0.008	0.0466063	1
Dendritic_cells	ZNF366	0.439472	1719	3.23296	0.006	0.0391176	1
B_cells	ZNF330	0.51144	754	3.70284	0.003	0.0184264	0.998
B_cells	ZNF302	0.512735	734	3.71435	0.003	0.018258	0.997
B_cells	ZNF277	0.575887	259	4.30356	0.001	0.00617416	0.726
B_cells	ZNF274	0.439038	2178	3.08881	0.008	0.0484661	1
B_cells	ZNF267	0.554857	370	4.10083	0.001	0.00903663	0.905
B_cells	ZNF24	0.535739	501	3.92239	0.002	0.0127019	0.979
B_cells	ZNF22	0.539192	469	3.95424	0.002	0.0121277	0.974
B_cells	ZNF195	0.467838	1462	3.32659	0.005	0.0340284	1
B_cells	ZNF107	0.448905	1902	3.1694	0.008	0.0432665	1
B_cells	ZNF106	0.435831	2299	3.0628	0.008	0.049629	1
B_cells	ZMYND8	0.570891	275	4.25475	0.001	0.00699528	0.78
B_cells	ZMYM5	0.557077	352	4.1219	0.001	0.00871541	0.885
Macrophages	ZMIZ1-AS1	-0.439597	1525	3.30212	0.005	0.0353476	1
B_cells	ZKSCAN1	0.495405	975	3.56199	0.003	0.0232596	1
B_cells	ZFYVE27	0.490348	1046	3.51819	0.004	0.0251744	1
Macrophages	ZFAND2A	-0.496926	620	3.81652	0.002	0.0149937	0.994
Fibroblasts	ZCCHC7	0.482192	1105	3.48801	0.004	0.0263181	1
B_cells	ZC3H7A	0.563614	310	4.18439	0.001	0.00799666	0.836
B_cells	ZC3H6	0.497872	930	3.58346	0.003	0.0226402	1
Dendritic_cells	ZC3H14	0.42012	2257	3.07022	0.008	0.0494907	1
Monocytes	ZC3H13	0.429052	1979	3.14492	0.008	0.0448571	1
B_cells	ZBED5	0.488992	1071	3.50649	0.004	0.025543	1
Dendritic_cells	ZBED1	0.444802	1586	3.27838	0.005	0.0366965	1
T_cells	ZAP70	0.508475	590	3.84377	0.002	0.0143414	0.99
Endothelial_cells	YWHAQ	-0.489592	861	3.6321	0.003	0.0207202	1
Dendritic_cells	YWHAH	-0.499832	682	3.76432	0.003	0.0164355	0.995
B_cells	YTHDC2	0.463213	1557	3.28786	0.005	0.0362831	1
Macrophages	YLPM1	0.443951	1420	3.33999	0.005	0.0335485	1
Macrophages	YIPF3	0.448561	1329	3.38029	0.005	0.0314305	1
Endothelial_cells	YIF1B	-0.431939	2019	3.13532	0.008	0.0452925	1
Dendritic_cells	XXYLT1	0.453445	1390	3.35261	0.005	0.0328709	1
B_cells	XPO6	0.436571	2263	3.06879	0.008	0.0495889	1
Fibroblasts	XPNPEP1	0.495548	897	3.60443	0.003	0.0218126	1
Monocytes	XPA	0.424154	2122	3.10387	0.008	0.0473981	1
B_cells	XIAP	0.442245	2087	3.1149	0.008	0.0467114	1
Dendritic_cells	XCR1	0.552269	271	4.26175	0.001	0.00692255	0.773
Monocytes	XAF1	0.586218	137	4.60621	0	0.00352377	0.39
B_cells	WDR70	0.525131	604	3.8256	0.002	0.0148965	0.99
Macrophages	WDR54	-0.420131	2021	3.13496	0.008	0.0453254	1
Dendritic_cells	WDR43	0.537095	359	4.11383	0.001	0.0088759	0.89
B_cells	WDR34	0.454826	1764	3.21818	0.006	0.0399791	1
Monocytes	WASHC2C	0.446339	1547	3.29153	0.005	0.0360674	1
Macrophages	WASF2	0.506446	519	3.90557	0.002	0.0130043	0.981
Macrophages	WARS	0.615385	55	5.0228	0	0.00168658	0.108
B_cells	WAPL	0.50552	829	3.65048	0.003	0.0201254	0.999
Endothelial_cells	VWA1	-0.448367	1606	3.27353	0.005	0.036758	1
B_cells	VTI1A	0.503546	857	3.63312	0.003	0.0206751	1
B_cells	VRK3	0.469874	1411	3.34369	0.005	0.0333571	1
Dendritic_cells	VRK2	0.51904	480	3.94217	0.002	0.0123928	0.977
B_cells	VPS72	0.516867	697	3.75122	0.003	0.0169031	0.995
B_cells	VPS4A	0.477644	1268	3.40939	0.004	0.0298818	1
Macrophages	VPS35L	0.489584	701	3.74859	0.003	0.0169736	0.995
Monocytes	VPS25	0.432893	1877	3.17726	0.008	0.0427937	1
B_cells	VPS13D	0.442985	2062	3.12094	0.008	0.0463623	1
B_cells	VPS13B	0.530496	558	3.87437	0.002	0.0135672	0.986
B_cells	VMA21	0.483811	1164	3.46199	0.004	0.0273346	1
Macrophages	VKORC1	-0.484504	757	3.70198	0.003	0.0184264	0.998
Macrophages	VEGFA	-0.631008	42	5.20163	0	0.00103838	0.057
Dendritic_cells	VDAC3	0.459016	1289	3.40084	0.005	0.0302788	1
B_cells	VDAC2	0.449522	1888	3.17446	0.008	0.0429249	1
Endothelial_cells	VDAC1	-0.546786	326	4.16289	0.001	0.00818215	0.85
Macrophages	VCPIP1	0.518142	425	4.01658	0.002	0.0106884	0.952
Macrophages	VCAN	-0.479126	821	3.65294	0.003	0.0201254	0.999
Fibroblasts	VCAM1	0.526596	545	3.88326	0.002	0.0134774	0.985
Endothelial_cells	VASP	-0.445969	1666	3.2532	0.005	0.0378442	1
Macrophages	VAMP8	0.447366	1350	3.36982	0.005	0.0320181	1
Macrophages	VAMP5	0.628618	44	5.17389	0	0.00111705	0.062
Macrophages	UVRAG	0.475625	876	3.62121	0.003	0.0211213	1
Monocytes	UTP3	0.434382	1845	3.18983	0.008	0.0418332	1
B_cells	USP4	0.566821	292	4.21529	0.001	0.00764562	0.809
B_cells	USP39	0.554055	375	4.09324	0.001	0.0091779	0.913
Macrophages	USP30-AS1	0.497353	613	3.82048	0.002	0.0149603	0.994
B_cells	USP11	0.521307	649	3.79107	0.002	0.0156649	0.994
B_cells	USP10	0.449275	1893	3.17244	0.008	0.0430427	1
Dendritic_cells	USF3	0.438079	1753	3.22114	0.006	0.0398568	1
Macrophages	UQCRQ	-0.504909	540	3.89111	0.002	0.0132054	0.985
Macrophages	UQCC3	-0.431145	1730	3.22911	0.006	0.0393561	1
Macrophages	UPP1	-0.58926	104	4.73572	0	0.00285555	0.274
Macrophages	UHRF1BP1	0.420644	2003	3.13932	0.008	0.0450849	1
B_cells	UGP2	0.455874	1740	3.22685	0.006	0.039414	1
Monocytes	UCP2	0.649844	32	5.31333	0	0.000713888	0.03
Fibroblasts	UBQLN2	0.456175	1627	3.26668	0.005	0.037129	1
B_cells	UBN1	0.44613	1970	3.14664	0.008	0.0447845	1
Endothelial_cells	UBL7	0.476735	1044	3.51833	0.004	0.0251744	1
Endothelial_cells	UBL5	-0.481837	974	3.56326	0.003	0.0232069	1
B_cells	UBE4A	0.476411	1294	3.39892	0.005	0.0303502	1
Endothelial_cells	UBE2T	-0.46949	1181	3.45503	0.004	0.0276673	1
Endothelial_cells	UBE2S	-0.549286	309	4.18712	0.001	0.00794189	0.833
B_cells	UBE2R2	0.484058	1161	3.4641	0.004	0.0272378	1
Macrophages	UBE2Q1	-0.435883	1616	3.26996	0.005	0.036993	1
Macrophages	UBE2M	-0.435841	1617	3.26959	0.005	0.036993	1
Endothelial_cells	UBE2L6	0.61949	69	4.91161	0	0.00205924	0.156
Fibroblasts	UBE2F	-0.524052	575	3.85995	0.002	0.0138884	0.987
Macrophages	UBE2E2	0.514813	446	3.98479	0.002	0.0114045	0.965
B_cells	UBE2E1	0.499846	904	3.60069	0.003	0.0219654	1
Endothelial_cells	UBE2C	-0.574592	206	4.43803	0.001	0.00466361	0.571
Macrophages	UBE2B	-0.433023	1686	3.24528	0.006	0.0383803	1
Endothelial_cells	UBAP2L	-0.44551	1677	3.24931	0.006	0.0380744	1
B_cells	UBAC2	0.50552	827	3.65048	0.003	0.0201254	0.999
Endothelial_cells	UBA7	0.507857	641	3.79701	0.002	0.0155385	0.994
Macrophages	UAP1L1	-0.435158	1633	3.26369	0.005	0.0373258	1
Neutrophils	TYMP	0.648352	658	3.78422	0.002	0.0159019	0.995
Neutrophils	TXNIP	0.643468	708	3.74316	0.003	0.0171568	0.995
Dendritic_cells	TXNDC15	0.429532	1966	3.14896	0.008	0.0446341	1
B_cells	TXN2	0.435831	2300	3.0628	0.008	0.049629	1
Macrophages	TWSG1	-0.518228	423	4.01739	0.002	0.0106884	0.952
B_cells	TWF2	0.451989	1828	3.19476	0.006	0.0415258	1
B_cells	TVP23B	0.557879	349	4.12953	0.001	0.00860855	0.878
B_cells	TUT7	0.589146	207	4.43517	0.001	0.00466361	0.574
Neutrophils	TUBB4B	-0.625763	912	3.59792	0.003	0.0219654	1
Tumor	TUBB3	-0.493929	921	3.59021	0.003	0.0223694	1
Endothelial_cells	TUBA1C	-0.423316	2292	3.06375	0.008	0.049629	1
Mast_cells	TUBA1A	-0.522267	1137	3.47671	0.004	0.0266874	1
Endothelial_cells	TTYH3	-0.466735	1232	3.4311	0.004	0.0286579	1
Macrophages	TTC14	0.429694	1769	3.21665	0.006	0.0400435	1
B_cells	TTC1	0.559297	342	4.14305	0.001	0.00835766	0.868
Endothelial_cells	TSPYL4	-0.454286	1466	3.32393	0.005	0.0342307	1
B_cells	TSPO	0.436941	2250	3.07179	0.008	0.0494058	1
Macrophages	TSPAN4	0.442244	1465	3.32512	0.005	0.0340996	1
B_cells	TSEN34	0.436448	2270	3.06779	0.008	0.0496142	1
Neutrophils	TSC22D3	0.616606	1032	3.52486	0.004	0.0249393	1
Monocytes	TRPV2	0.443457	1626	3.2669	0.005	0.0371182	1
B_cells	TRPC4AP	0.456183	1728	3.22941	0.006	0.0393561	1
B_cells	TRNAU1AP	0.438051	2212	3.08079	0.008	0.0488903	1
Monocytes	TRMT2A	0.419304	2293	3.06343	0.008	0.049629	1
B_cells	TRIP12	0.537959	479	3.94285	0.002	0.0123928	0.977
Macrophages	TRIM69	0.558909	213	4.41872	0.001	0.00487503	0.594
B_cells	TRIM56	0.476349	1296	3.3984	0.005	0.0303519	1
Monocytes	TRIM26	0.485714	855	3.63649	0.003	0.0205426	1
Dendritic_cells	TRIM25	0.502473	655	3.7885	0.002	0.0157211	0.994
Dendritic_cells	TRIM22	0.515582	511	3.9098	0.002	0.0130043	0.98
Fibroblasts	TRIM21	0.467623	1364	3.36321	0.005	0.0323646	1
Dendritic_cells	TRIM14	0.593661	116	4.68448	0	0.00308531	0.315
Macrophages	TREM1	-0.581235	123	4.65028	0	0.00338811	0.346
T_cells	TRAV5	0.465066	1184	3.45358	0.004	0.0276803	1
T_cells	TRAT1	0.483986	877	3.62099	0.003	0.0211213	1
B_cells	TRAPPC6B	0.466913	1477	3.31882	0.005	0.0344981	1
B_cells	TRAPPC4	0.46827	1449	3.33021	0.005	0.0339105	1
Tumor	TRAPPC2L	-0.539431	435	4.00219	0.002	0.0110347	0.959
Macrophages	TRANK1	0.573551	154	4.56959	0	0.00374347	0.439
Macrophages	TRAFD1	0.576197	145	4.59726	0	0.00352811	0.399
T_cells	TRAF3IP3	0.623337	57	5.00768	0	0.00172456	0.112
B_cells	TPTEP2-CSNK1E	0.477953	1262	3.41201	0.004	0.0297944	1
Endothelial_cells	TPR	0.488571	873	3.623	0.003	0.0210761	1
Macrophages	TPI1	-0.54256	276	4.25443	0.001	0.00699528	0.781
B_cells	TPGS2	0.471292	1379	3.35564	0.005	0.0327801	1
B_cells	TOR1AIP1	0.480358	1228	3.43249	0.004	0.0285954	1
Monocytes	TOR1A	0.49599	722	3.7293	0.003	0.017598	0.995
Dendritic_cells	TOPORS	0.56994	205	4.43858	0.001	0.00466361	0.568
Dendritic_cells	TOP1MT	0.452485	1409	3.34433	0.005	0.0333515	1
Endothelial_cells	TOMM5	-0.42551	2209	3.0819	0.008	0.0488389	1
Macrophages	TNS1	-0.534876	314	4.17865	0.001	0.00802356	0.838
B_cells	TNKS2	0.456923	1713	3.23554	0.006	0.0389574	1
Fibroblasts	TNK2	-0.475601	1231	3.43128	0.004	0.0286579	1
Macrophages	TNFSF14	-0.500896	578	3.85351	0.002	0.0141048	0.987
Macrophages	TNFSF13B	0.543669	267	4.26545	0.001	0.00692255	0.772
Monocytes	TNFSF13	0.444994	1577	3.28002	0.005	0.0366466	1
Monocytes	TNFSF10	0.602257	96	4.7762	0	0.00267528	0.245
Endothelial_cells	TNFRSF25	-0.432398	2005	3.13915	0.008	0.0450849	1
T_cells	TNFRSF18	-0.518079	488	3.93316	0.002	0.0125514	0.977
Dendritic_cells	TNFRSF14	0.616903	66	4.936	0	0.00204577	0.147
Macrophages	TNFRSF10D	-0.46982	957	3.56887	0.003	0.0231376	1
Macrophages	TNFAIP8L2	0.429437	1773	3.21445	0.006	0.0402503	1
B_cells	TMUB2	0.473636	1342	3.37542	0.005	0.0316348	1
Macrophages	TMSB4X	0.473064	911	3.59807	0.003	0.0219654	1
Endothelial_cells	TMEM74B	-0.472092	1136	3.4777	0.004	0.0266073	1
Tumor	TMEM65	-0.499537	846	3.6396	0.003	0.0205143	1
Macrophages	TMEM45A	-0.508153	502	3.92166	0.002	0.0127019	0.979
Tumor	TMEM258	-0.52833	527	3.8992	0.002	0.0130928	0.982
Macrophages	TMEM256	-0.57688	139	4.60442	0	0.00352377	0.393
Macrophages	TMEM243	0.500555	583	3.85032	0.002	0.014164	0.987
B_cells	TMEM223	0.486648	1112	3.48632	0.004	0.0263181	1
Endothelial_cells	TMEM189	-0.517449	544	3.88526	0.002	0.0134137	0.985
Fibroblasts	TMEM176A	0.435361	2156	3.09436	0.008	0.0481274	1
B_cells	TMEM175	0.529695	565	3.86706	0.002	0.0137973	0.986
Monocytes	TMEM173	0.427371	2035	3.13081	0.008	0.0456181	1
Macrophages	TMEM167A	-0.427388	1818	3.19688	0.006	0.0414713	1
B_cells	TMEM165	0.438421	2199	3.0838	0.008	0.0487789	1
Monocytes	TMEM14B	0.425306	2094	3.11351	0.008	0.046716	1
Endothelial_cells	TMEM140	0.515102	569	3.86355	0.002	0.0138402	0.987
Macrophages	TMEM138	0.468112	989	3.55355	0.004	0.0235819	1
Tumor	TMEM134	-0.485315	1052	3.51504	0.004	0.0253081	1
B_cells	TMEM131L	0.496886	950	3.57487	0.003	0.0228575	1
Endothelial_cells	TMEM120A	0.424847	2231	3.07641	0.008	0.0491293	1
B_cells	TMEM109	0.457663	1694	3.24167	0.006	0.0385874	1
Fibroblasts	TMEM108	0.437327	2102	3.11047	0.008	0.0469414	1
Monocytes	TMEM107	-0.444418	1600	3.2751	0.005	0.036758	1
Monocytes	TMEM106B	0.44	1708	3.23745	0.006	0.0388323	1
Tumor	TMED3	-0.491443	958	3.56843	0.003	0.0231376	1
Tumor	TMED2	-0.486355	1035	3.52408	0.004	0.0249452	1
Macrophages	TMCO3	-0.509434	487	3.93376	0.002	0.0125445	0.977
Endothelial_cells	TMBIM6	0.43398	1953	3.15235	0.008	0.0444385	1
Fibroblasts	TMA7	-0.532724	482	3.93976	0.002	0.0124448	0.977
B_cells	TM9SF2	0.582054	228	4.36439	0.001	0.00553199	0.65
Macrophages	TLR8	0.572569	159	4.55935	0	0.00375298	0.445
Macrophages	TLR7	0.411765	2288	3.06414	0.008	0.049629	1
B_cells	TLR10	0.456861	1714	3.23503	0.006	0.0389743	1
B_cells	TINF2	0.497872	931	3.58346	0.003	0.0226402	1
Dendritic_cells	TIMP1	-0.538824	347	4.13051	0.001	0.00859152	0.876
Macrophages	TIMM8A	-0.475198	881	3.61735	0.003	0.0212951	1
Monocytes	TIMM23	0.542377	323	4.16493	0.001	0.00818215	0.848
Macrophages	TIFAB	0.479638	816	3.6576	0.003	0.0199439	0.999
Macrophages	THRAP3	0.425339	1872	3.17935	0.008	0.0426476	1
B_cells	THOC3	0.491829	1020	3.53098	0.004	0.0247153	1
T_cells	THEMIS	0.468427	1121	3.48304	0.004	0.0264502	1
B_cells	THAP7	0.57675	255	4.31203	0.001	0.00607012	0.713
Fibroblasts	THAP4	0.490518	981	3.56035	0.003	0.0232596	1
B_cells	THAP1	0.527536	586	3.84741	0.002	0.014206	0.989
Dendritic_cells	TGFBR1	-0.499736	684	3.76344	0.003	0.0164355	0.995
Monocytes	TGFB1	0.432221	1896	3.17159	0.008	0.0430908	1
Endothelial_cells	TFPI	0.518673	531	3.89661	0.002	0.0131736	0.982
Endothelial_cells	TFF3	0.476531	1049	3.51654	0.004	0.0252475	1
Macrophages	TFEC	0.618117	49	5.05366	0	0.00168658	0.099
Macrophages	TFCP2	0.459916	1131	3.48044	0.004	0.0264734	1
Monocytes	TEX264	0.436255	1797	3.20567	0.006	0.0408218	1
Endothelial_cells	TENT4A	-0.426633	2165	3.0912	0.008	0.0483624	1
Macrophages	TCN2	0.49428	647	3.79196	0.002	0.0156649	0.994
Macrophages	TCEAL9	-0.702809	13	6.10981	0	0	0
B_cells	TBRG4	0.454456	1771	3.21512	0.006	0.0402012	1
B_cells	TBP	0.440456	2137	3.10034	0.008	0.0476486	1
B_cells	TBC1D9B	0.486525	1116	3.48526	0.004	0.0263603	1
Macrophages	TBC1D5	0.423333	1920	3.16222	0.008	0.043859	1
T_cells	TBC1D10C	0.447011	1530	3.29728	0.005	0.0357519	1
Macrophages	TAX1BP1	0.510202	481	3.94102	0.002	0.0124088	0.977
B_cells	TATDN3	0.460006	1644	3.26114	0.005	0.037352	1
Dendritic_cells	TAPBPL	0.578583	169	4.527	0	0.00401426	0.476
Macrophages	TAPBP	0.473406	902	3.60115	0.003	0.0219654	1
Monocytes	TAP2	0.540552	337	4.14723	0.001	0.00831724	0.866
Macrophages	TAP1	0.649279	26	5.41835	0	0.000479253	0.017
Fibroblasts	TAOK3	0.443918	1912	3.16472	0.008	0.043708	1
Dendritic_cells	TANGO2	0.506218	610	3.82293	0.002	0.0149141	0.992
Endothelial_cells	TACSTD2	-0.456735	1407	3.34489	0.005	0.033334	1
Macrophages	TAB2	-0.449074	1321	3.38478	0.005	0.031119	1
B_cells	SZRD1	0.447672	1932	3.15927	0.008	0.0440033	1
Mast_cells	SYTL2	0.486032	1856	3.18511	0.008	0.0422223	1
Endothelial_cells	SYNE2	0.51102	602	3.82598	0.002	0.0148965	0.99
Endothelial_cells	SYMPK	-0.441327	1774	3.21399	0.006	0.0402647	1
Monocytes	SUPT4H1	0.508715	588	3.84599	0.002	0.014263	0.989
Monocytes	SUMF2	0.42593	2074	3.11874	0.008	0.0464111	1
B_cells	SUGT1	0.492569	1009	3.53738	0.004	0.0244263	1
Monocytes	STYXL1	0.443553	1620	3.26772	0.005	0.0371159	1
Macrophages	STXBP2	-0.455648	1211	3.44263	0.004	0.0280565	1
B_cells	STX8	0.494357	991	3.55289	0.004	0.0235819	1
Endothelial_cells	STX6	-0.522245	492	3.92983	0.002	0.0125999	0.978
Macrophages	STX11	0.471783	926	3.58653	0.003	0.0225304	1
Endothelial_cells	STMP1	-0.482143	966	3.56596	0.003	0.0231396	1
Fibroblasts	STK25	-0.461089	1511	3.30796	0.005	0.0350443	1
B_cells	STIP1	0.454949	1761	3.2192	0.006	0.0399103	1
Endothelial_cells	STAT2	0.423265	2294	3.06333	0.008	0.049629	1
Monocytes	STAT1	0.681056	19	5.69761	0	0.000138451	0.004
B_cells	STAG2	0.532347	538	3.89128	0.002	0.0132054	0.985
Dendritic_cells	ST6GAL1	0.436351	1791	3.20649	0.006	0.0407729	1
Endothelial_cells	ST3GAL6	-0.447245	1632	3.264	0.005	0.0373164	1
Monocytes	ST3GAL5	0.522497	457	3.97469	0.002	0.0115602	0.97
Macrophages	ST3GAL4	-0.413387	2221	3.07782	0.008	0.0491174	1
Macrophages	ST20	-0.608725	63	4.94826	0	0.0020335	0.14
B_cells	ST13	0.489485	1062	3.51074	0.004	0.0253794	1
B_cells	SSU72	0.466173	1498	3.31262	0.005	0.0347823	1
Monocytes	SSRP1	0.453349	1393	3.35178	0.005	0.0328729	1
Macrophages	SSBP3	-0.44028	1509	3.30805	0.005	0.0350443	1
B_cells	SRSF11	0.49004	1051	3.51553	0.004	0.0252736	1
B_cells	SRRT	0.518224	685	3.76337	0.003	0.0164355	0.995
Macrophages	SRPRA	0.419278	2042	3.12771	0.008	0.0458627	1
B_cells	SRP68	0.4642	1535	3.29611	0.005	0.0357865	1
B_cells	SREK1IP1	0.46013	1641	3.26217	0.005	0.0373286	1
B_cells	SPTLC2	0.528955	574	3.86032	0.002	0.0138884	0.987
B_cells	SPTLC1	0.469072	1425	3.33695	0.005	0.0337068	1
Endothelial_cells	SPTBN5	-0.481939	972	3.56416	0.003	0.023177	1
Fibroblasts	SPTBN1	0.455481	1645	3.26087	0.005	0.037352	1
Fibroblasts	SPRYD3	0.458488	1562	3.28608	0.005	0.0363886	1
Endothelial_cells	SPRY4	-0.446276	1660	3.25579	0.005	0.0376774	1
Endothelial_cells	SPPL2B	-0.425204	2217	3.07937	0.008	0.0490395	1
Macrophages	SPP1	-0.852301	1	8.85152	0	0	0
Macrophages	SPOP	0.546786	260	4.29649	0.001	0.00633147	0.737
Tumor	SPOCK1	-0.437327	2104	3.11047	0.008	0.0469414	1
B_cells	SPI1	0.506753	811	3.66135	0.003	0.0198014	0.999
Macrophages	SPART	0.441859	1470	3.32177	0.005	0.0343682	1
Macrophages	SPAG9	-0.417741	2088	3.11467	0.008	0.046716	1
B_cells	SPAG7	0.457663	1695	3.24167	0.006	0.0385874	1
B_cells	SP140L	0.471662	1374	3.35876	0.005	0.0326035	1
Dendritic_cells	SP140	0.457095	1324	3.38417	0.005	0.031119	1
Macrophages	SP110	0.560873	204	4.43874	0.001	0.00466361	0.568
Endothelial_cells	SP100	0.424847	2230	3.07641	0.008	0.0491293	1
Endothelial_cells	SOX11	-0.435408	1915	3.1643	0.008	0.0437129	1
B_cells	SON	0.451989	1829	3.19476	0.006	0.0415258	1
Fibroblasts	SOD3	0.458834	1554	3.28899	0.005	0.0362207	1
Monocytes	SOCS3	-0.429532	1965	3.14896	0.008	0.0446341	1
B_cells	SNX4	0.547209	418	4.02882	0.002	0.0103507	0.944
Monocytes	SNX27	0.435582	1813	3.19998	0.006	0.0412321	1
B_cells	SNX22	0.53543	504	3.91956	0.002	0.0127559	0.979
T_cells	SNX20	0.523457	448	3.98375	0.002	0.0114045	0.965
Monocytes	SNX2	0.512509	547	3.88117	0.002	0.0135216	0.986
Monocytes	SNX11	0.503097	643	3.79422	0.002	0.0156332	0.994
B_cells	SNX1	0.565834	299	4.20577	0.001	0.00766805	0.82
B_cells	SNRPN	0.486648	1113	3.48632	0.004	0.0263181	1
Endothelial_cells	SNRPG	-0.483367	946	3.57679	0.003	0.0228188	1
Fibroblasts	SNRPF	-0.477567	1198	3.44815	0.004	0.0278745	1
B_cells	SNRPD3	0.449522	1886	3.17446	0.008	0.0429249	1
B_cells	SNRNP70	0.514647	720	3.73138	0.003	0.0175323	0.995
B_cells	SNRNP35	0.440765	2132	3.10285	0.008	0.0474289	1
Fibroblasts	SNHG9	-0.486413	1033	3.52458	0.004	0.0249393	1
Mast_cells	SNHG8	-0.515587	1244	3.42186	0.004	0.0292739	1
T_cells	SNHG15	-0.510396	570	3.86155	0.002	0.0138884	0.987
Monocytes	SNAPC5	0.552845	265	4.26744	0.001	0.00692255	0.767
B_cells	SNAPC2	0.496146	960	3.56843	0.003	0.0231376	1
Tumor	SNAPC1	-0.518501	628	3.8094	0.002	0.0151495	0.994
Monocytes	SNAI1	-0.419928	2264	3.06862	0.008	0.0495889	1
Fibroblasts	SMS	-0.60858	115	4.68747	0	0.00308531	0.312
Endothelial_cells	SMOX	-0.51102	603	3.82598	0.002	0.0148965	0.99
B_cells	SMIM37	0.471477	1378	3.3572	0.005	0.0326771	1
B_cells	SMIM12	0.482331	1195	3.44933	0.004	0.0278118	1
Macrophages	SMCO4	0.708529	11	6.18957	0	0	0
B_cells	SMC6	0.461363	1609	3.27243	0.005	0.0368494	1
Macrophages	SMARCC2	0.477589	848	3.63899	0.003	0.020526	1
Endothelial_cells	SMARCC1	-0.44898	1584	3.27872	0.005	0.0366965	1
B_cells	SLU7	0.462966	1563	3.2858	0.005	0.03639	1
Dendritic_cells	SLTM	0.442689	1647	3.26035	0.005	0.037352	1
Macrophages	SLCO4A1	-0.52732	363	4.10498	0.001	0.00903663	0.904
Macrophages	SLC7A7	0.585674	113	4.69739	0	0.00303621	0.304
B_cells	SLC7A6OS	0.491212	1031	3.52565	0.004	0.0249004	1
Macrophages	SLC5A3	-0.457739	1168	3.46113	0.004	0.0273684	1
Macrophages	SLC50A1	0.515154	444	3.98804	0.002	0.0113421	0.964
Endothelial_cells	SLC4A7	-0.482602	955	3.57002	0.003	0.0231261	1
Macrophages	SLC43A3	-0.49492	639	3.79789	0.002	0.0155152	0.994
Macrophages	SLC39A4	-0.435286	1631	3.2648	0.005	0.0372417	1
Endothelial_cells	SLC39A13	-0.460612	1336	3.3782	0.005	0.0314789	1
B_cells	SLC38A1	0.446192	1969	3.14715	0.008	0.0447845	1
Endothelial_cells	SLC37A3	-0.443571	1720	3.23292	0.006	0.0391176	1
Macrophages	SLC35A4	0.42329	1922	3.16186	0.008	0.043859	1
Macrophages	SLC31A2	0.70759	12	6.17638	0	0	0
B_cells	SLC30A7	0.479494	1241	3.42513	0.004	0.0290027	1
Macrophages	SLC2A9	0.415692	2149	3.09731	0.008	0.0478258	1
Macrophages	SLC2A6	0.469393	971	3.56504	0.003	0.0231396	1
Macrophages	SLC2A5	-0.453086	1245	3.42004	0.004	0.0294253	1
Macrophages	SLC2A3	-0.515154	445	3.98804	0.002	0.0113421	0.964
Macrophages	SLC2A1	-0.552036	234	4.34914	0.001	0.00568166	0.67
Endothelial_cells	SLC26A6	-0.486837	894	3.60756	0.003	0.0216762	1
Dendritic_cells	SLC25A6	0.552653	266	4.26554	0.001	0.00692255	0.771
Dendritic_cells	SLC25A45	0.452965	1400	3.34847	0.005	0.0331377	1
Macrophages	SLC25A37	-0.452745	1249	3.41703	0.004	0.0295839	1
Endothelial_cells	SLC25A36	0.447959	1615	3.27006	0.005	0.036993	1
Macrophages	SLC16A3	-0.563647	193	4.46714	0.001	0.00452297	0.541
Macrophages	SLC16A10	-0.543499	268	4.26375	0.001	0.00692255	0.772
Monocytes	SLC12A9	0.489796	792	3.6732	0.003	0.0194469	0.999
Monocytes	SLC12A7	0.469964	1087	3.49655	0.004	0.0260478	1
Macrophages	SLC11A1	-0.455562	1213	3.44188	0.004	0.0280565	1
Macrophages	SLAMF9	-0.66217	23	5.57668	0	0.000180588	0.006
Macrophages	SLAMF7	0.609323	61	4.95491	0	0.0020335	0.136
B_cells	SLAMF6	0.565156	303	4.19923	0.001	0.0077199	0.824
B_cells	SKAP2	0.44021	2143	3.09833	0.008	0.0477759	1
Endothelial_cells	SIPA1L3	-0.426531	2171	3.09036	0.008	0.0484001	1
Dendritic_cells	SIPA1L1	-0.429148	1977	3.14573	0.008	0.0448173	1
Macrophages	SIGLEC10	0.460044	1126	3.48157	0.004	0.0264577	1
Macrophages	SIDT2	0.501153	577	3.85591	0.002	0.0140407	0.987
Dendritic_cells	SHTN1	0.46886	1110	3.48684	0.004	0.0263181	1
B_cells	SHMT2	0.505088	834	3.64668	0.003	0.0203128	1
Dendritic_cells	SHKBP1	0.487587	819	3.65331	0.003	0.0201254	0.999
B_cells	SH3BP2	0.486772	1107	3.48738	0.004	0.0263181	1
Endothelial_cells	SH3BGRL3	-0.509184	630	3.80914	0.002	0.0151495	0.994
Macrophages	SH3BGRL	0.448135	1341	3.37655	0.005	0.0315417	1
B_cells	SH2B1	0.457293	1705	3.23861	0.006	0.0387858	1
Macrophages	SGSH	-0.471357	933	3.58269	0.003	0.0226402	1
Endothelial_cells	SGMS1	0.42398	2262	3.06923	0.008	0.0495583	1
B_cells	SGF29	0.483441	1172	3.45882	0.004	0.0274606	1
Fibroblasts	SGCD	-0.482539	1095	3.49101	0.004	0.0262743	1
Macrophages	SFXN1	-0.458123	1158	3.46454	0.004	0.0272378	1
Macrophages	SFT2D2	0.596858	88	4.81777	0	0.00253336	0.221
Fibroblasts	SFN	-0.479533	1156	3.46506	0.004	0.0272378	1
Fibroblasts	SF3B5	-0.449584	1781	3.21168	0.006	0.0403866	1
Endothelial_cells	SF3B4	0.469388	1182	3.45414	0.004	0.0276803	1
B_cells	SF3A2	0.510947	764	3.69846	0.003	0.0184923	0.998
B_cells	SF3A1	0.465125	1518	3.30384	0.005	0.0353374	1
Dendritic_cells	SETD7	0.428715	1994	3.1421	0.008	0.0449441	1
B_cells	SETD5	0.564231	308	4.19032	0.001	0.00787777	0.83
Macrophages	SETD3	-0.438829	1538	3.29545	0.005	0.0358177	1
Endothelial_cells	SERTAD4-AS1	-0.472551	1125	3.48171	0.004	0.0264577	1
Monocytes	SERTAD1	-0.419544	2280	3.06543	0.008	0.049629	1
Macrophages	SERPINH1	-0.413301	2227	3.0771	0.008	0.0491293	1
Endothelial_cells	SERPING1	0.63051	53	5.03427	0	0.00168658	0.107
Macrophages	SERPINE1	-0.564629	187	4.47722	0	0.00443117	0.525
Monocytes	SERPINB2	-0.421032	2222	3.07782	0.008	0.0491174	1
Macrophages	SERPINA1	0.492017	670	3.77103	0.002	0.0163834	0.995
B_cells	SEPHS2	0.450879	1853	3.18562	0.008	0.04221	1
Dendritic_cells	SEPHS1	0.5103	572	3.86066	0.002	0.0138884	0.987
B_cells	SENP7	0.458896	1669	3.25191	0.006	0.0379554	1
Macrophages	SEMA6B	-0.454879	1223	3.43585	0.004	0.0284277	1
Macrophages	SEMA4B	-0.553488	229	4.36377	0.001	0.00553199	0.654
Endothelial_cells	SEMA3F	-0.478061	1023	3.52999	0.004	0.0247432	1
Endothelial_cells	SEMA3A	0.452041	1514	3.30477	0.005	0.0352972	1
Dendritic_cells	SELL	0.420504	2242	3.07342	0.008	0.0493587	1
Mast_cells	SELENOM	-0.526518	1058	3.51189	0.004	0.0253794	1
Tumor	SELENOI	-0.438136	2079	3.11711	0.008	0.0465551	1
Macrophages	SECTM1	0.45838	1149	3.46681	0.004	0.0272378	1
Macrophages	SEC61G	-0.603432	77	4.88969	0	0.00205924	0.165
Endothelial_cells	SEC24D	-0.42602	2189	3.08613	0.008	0.0486051	1
B_cells	SEC23A	0.461733	1597	3.27552	0.005	0.036758	1
Monocytes	SDHD	0.426267	2061	3.12155	0.008	0.0463391	1
Dendritic_cells	SDHC	0.4594	1285	3.40418	0.005	0.0300293	1
Macrophages	SDHB	0.412277	2266	3.06846	0.008	0.0495889	1
B_cells	SDHAF3	0.462041	1588	3.27809	0.005	0.0367073	1
B_cells	SDF2	0.456799	1715	3.23452	0.006	0.0390545	1
Macrophages	SDC2	-0.576454	142	4.59994	0	0.00352377	0.394
Monocytes	SDAD1	0.422377	2176	3.08903	0.008	0.0484661	1
Macrophages	SCPEP1	0.491932	671	3.77024	0.002	0.0163834	0.995
Macrophages	SCML1	0.540511	284	4.23414	0.001	0.00733205	0.804
Macrophages	SCIMP	0.605182	70	4.90899	0	0.00205924	0.156
Monocytes	SCFD1	0.482737	891	3.60982	0.003	0.021613	1
Endothelial_cells	SCARF1	-0.422857	2314	3.05996	0.008	0.0498101	1
Fibroblasts	SC5D	0.441605	1978	3.14564	0.008	0.0448188	1
B_cells	SBNO1	0.437619	2225	3.07729	0.008	0.0491293	1
Mast_cells	SAT1	-0.471053	2265	3.06853	0.008	0.0495889	1
Endothelial_cells	SARAF	0.473163	1109	3.48706	0.004	0.0263181	1
Macrophages	SAP30	-0.417656	2091	3.11394	0.008	0.046716	1
Macrophages	SAMHD1	0.609067	62	4.95206	0	0.0020335	0.138
Monocytes	SAMD9L	0.571429	196	4.45372	0.001	0.00462552	0.555
Dendritic_cells	SAMD9	0.422137	2185	3.08703	0.008	0.0485528	1
B_cells	S100PBP	0.511625	751	3.70448	0.003	0.0184264	0.998
T_cells	S100A9	-0.498583	695	3.75292	0.003	0.0168631	0.995
T_cells	S100A8	-0.541032	333	4.15188	0.001	0.00830498	0.863
T_cells	S100A2	-0.539208	346	4.13422	0.001	0.00853314	0.874
Macrophages	S100A10	-0.506104	524	3.90235	0.002	0.0130802	0.981
Macrophages	RUNX1	-0.505934	525	3.90074	0.002	0.0130928	0.981
Dendritic_cells	RUFY4	0.494262	735	3.7136	0.003	0.018258	0.997
Endothelial_cells	RTP4	0.439388	1816	3.19768	0.006	0.0414484	1
Monocytes	RTN1	0.428908	1984	3.14371	0.008	0.0449338	1
B_cells	RTF1	0.468887	1432	3.33539	0.005	0.0337399	1
B_cells	RSU1	0.51107	762	3.69956	0.003	0.0184923	0.998
Endothelial_cells	RSAD2	0.457908	1384	3.35496	0.005	0.0327801	1
Monocytes	RRP8	0.436351	1792	3.20649	0.006	0.0407729	1
Macrophages	RRP12	-0.509178	491	3.93133	0.002	0.0125635	0.977
B_cells	RRAGA	0.440765	2131	3.10285	0.008	0.0474289	1
Macrophages	RRAD	-0.489371	703	3.74663	0.003	0.0170638	0.995
Dendritic_cells	RPS6KA4	0.475246	1004	3.54318	0.004	0.0240979	1
Tumor	RPS26	-0.439061	2051	3.12471	0.008	0.0461051	1
Macrophages	RPS20	-0.557927	215	4.40873	0.001	0.00497136	0.602
Macrophages	RPS17	-0.43345	1679	3.24896	0.006	0.0380757	1
B_cells	RPP38	0.46272	1567	3.28375	0.005	0.0364945	1
B_cells	RPL7L1	0.473882	1338	3.37751	0.005	0.0315053	1
Dendritic_cells	RPL7	0.523553	447	3.98466	0.002	0.0114045	0.965
Macrophages	RPL39L	-0.47221	920	3.59038	0.003	0.0223694	1
Macrophages	RPL36	-0.460258	1120	3.48347	0.004	0.0264447	1
Macrophages	RPL35	-0.434987	1640	3.26222	0.005	0.0373286	1
Macrophages	RPL22L1	-0.430291	1751	3.22178	0.006	0.0398319	1
Endothelial_cells	RP2	-0.437347	1870	3.18054	0.008	0.0425281	1
Monocytes	RNPEP	0.468043	1133	3.47967	0.004	0.0264963	1
B_cells	RNPC3	0.51551	713	3.73909	0.003	0.0172685	0.995
Endothelial_cells	RNF8	0.541276	361	4.10981	0.001	0.0089437	0.895
Fibroblasts	RNF7	-0.611586	107	4.71924	0	0.00298899	0.29
B_cells	RNF41	0.5144	723	3.72918	0.003	0.017598	0.995
Monocytes	RNF213	0.581753	158	4.55975	0	0.00375298	0.445
Macrophages	RNF20	0.412533	2254	3.07062	0.008	0.0494907	1
B_cells	RNF19A	0.460746	1623	3.2673	0.005	0.0371172	1
Endothelial_cells	RNF166	-0.450663	1545	3.29304	0.005	0.0359462	1
B_cells	RNF135	0.544743	433	4.00577	0.002	0.0109038	0.958
B_cells	RNF114	0.519087	669	3.77111	0.002	0.0163834	0.995
B_cells	RNASEH2B	0.453839	1786	3.21003	0.006	0.0404969	1
Macrophages	RNASE1	-0.512636	463	3.96409	0.002	0.0118805	0.971
Mast_cells	RLF	-0.50496	1431	3.33565	0.005	0.0337399	1
B_cells	RIPK2	0.496146	959	3.56843	0.003	0.0231376	1
Macrophages	RHOC	-0.413216	2233	3.07638	0.008	0.0491293	1
T_cells	RHOB	-0.451429	1433	3.33523	0.005	0.0337399	1
B_cells	RHBDF2	0.47123	1382	3.35512	0.005	0.0327801	1
T_cells	RGS16	-0.512317	550	3.87938	0.002	0.0135216	0.986
Monocytes	RFX5	0.541417	329	4.15561	0.001	0.00830497	0.862
Endothelial_cells	RFLNB	-0.472449	1130	3.48082	0.004	0.0264705	1
Endothelial_cells	RFC1	0.464388	1264	3.41077	0.004	0.0298594	1
Monocytes	REX1BD	0.427899	2020	3.13524	0.008	0.0452981	1
B_cells	REST	0.458526	1681	3.24884	0.006	0.0380757	1
Monocytes	REPIN1	0.482449	895	3.60725	0.003	0.0216762	1
Dendritic_cells	RELT	-0.428667	1996	3.14169	0.008	0.0449577	1
Endothelial_cells	RELN	0.488878	869	3.62573	0.003	0.0209748	1
Monocytes	RECQL	0.466507	1153	3.46619	0.004	0.0272378	1
B_cells	RDH14	0.450509	1861	3.18258	0.008	0.042464	1
Monocytes	RCN1	0.492629	763	3.6988	0.003	0.0184923	0.998
Monocytes	RCC2	0.435102	1822	3.19592	0.006	0.0415258	1
Endothelial_cells	RCC1L	-0.556735	272	4.2599	0.001	0.00695309	0.775
B_cells	RCAN3	0.437558	2229	3.07679	0.008	0.0491293	1
B_cells	RBMX2	0.481838	1204	3.44511	0.004	0.0280104	1
B_cells	RBM23	0.468517	1445	3.33228	0.005	0.0337811	1
T_cells	RBM17	-0.425594	2082	3.11592	0.008	0.0466302	1
Dendritic_cells	RBM15B	0.427707	2025	3.13363	0.008	0.0454322	1
Dendritic_cells	RBL2	0.448739	1499	3.31211	0.005	0.0348257	1
Macrophages	RBCK1	0.571929	162	4.55269	0	0.00379031	0.452
Monocytes	RBBP7	0.444034	1611	3.27182	0.005	0.0368587	1
B_cells	RBBP4	0.435831	2297	3.0628	0.008	0.049629	1
B_cells	RASSF5	0.498674	919	3.59046	0.003	0.0223694	1
B_cells	RASAL3	0.440395	2139	3.09983	0.008	0.0476986	1
Macrophages	RASA4	0.455477	1216	3.44112	0.004	0.0280984	1
B_cells	RARS	0.507493	799	3.66789	0.003	0.0196292	0.999
Macrophages	RARRES3	0.69615	14	6.01853	0	4.33e-05	0.001
Endothelial_cells	RARRES2	0.507551	644	3.79421	0.002	0.0156332	0.994
Macrophages	RAPGEF2	0.46521	1026	3.52758	0.004	0.024839	1
B_cells	RAP1GDS1	0.438051	2213	3.08079	0.008	0.0488903	1
Endothelial_cells	RANGAP1	-0.427959	2133	3.10221	0.008	0.0474767	1
Monocytes	RALY	0.41916	2305	3.06223	0.008	0.049707	1
Dendritic_cells	RALA	-0.476303	993	3.55254	0.004	0.0235819	1
Macrophages	RAI14	-0.528558	358	4.11699	0.001	0.00881368	0.889
B_cells	RAD51C	0.465002	1520	3.30281	0.005	0.0353476	1
Macrophages	RAD23B	-0.468027	992	3.55279	0.004	0.0235819	1
B_cells	RAD23A	0.508603	786	3.6777	0.003	0.0193243	0.999
B_cells	RAD17	0.447179	1946	3.15523	0.008	0.0441792	1
Tumor	RAC3	-0.449584	1782	3.21168	0.006	0.0403866	1
Tumor	RABGGTB	-0.55747	320	4.17334	0.001	0.00804962	0.843
Dendritic_cells	RABGAP1L	0.459496	1284	3.40501	0.005	0.0299934	1
B_cells	RABEPK	0.569658	280	4.24277	0.001	0.00720832	0.793
Endothelial_cells	RABEP2	-0.424592	2237	3.0743	0.008	0.0493045	1
Monocytes	RAB8B	-0.447587	1523	3.30222	0.005	0.0353476	1
Macrophages	RAB8A	0.582942	118	4.66835	0	0.00327941	0.328
Dendritic_cells	RAB34	-0.4788	951	3.57471	0.003	0.0228575	1
Dendritic_cells	RAB33A	-0.505786	616	3.81895	0.002	0.0149603	0.994
B_cells	RAB29	0.479556	1240	3.42565	0.004	0.0289753	1
B_cells	RAB1B	0.504101	851	3.638	0.003	0.020526	1
Macrophages	RAB1A	-0.446427	1368	3.3616	0.005	0.0324102	1
B_cells	RAB14	0.451187	1849	3.18816	0.008	0.0419649	1
Endothelial_cells	RAB11FIP1	0.580306	175	4.49617	0	0.00433916	0.509
B_cells	RAB11B	0.51477	716	3.73248	0.003	0.0175323	0.995
Dendritic_cells	QSOX1	-0.493301	750	3.70489	0.003	0.0184264	0.998
B_cells	QRSL1	0.504533	839	3.64179	0.003	0.020513	1
B_cells	PYGO2	0.508912	781	3.68043	0.003	0.0192708	0.999
Fibroblasts	PYCR1	-0.536425	459	3.97413	0.002	0.0115602	0.97
B_cells	PXK	0.438606	2194	3.0853	0.008	0.0486443	1
Tumor	PVT1	-0.447329	1834	3.19295	0.006	0.0416791	1
B_cells	PUS7L	0.57601	258	4.30477	0.001	0.00616321	0.725
Dendritic_cells	PTRH2	0.48533	859	3.63304	0.003	0.0206751	1
Endothelial_cells	PTPRN2	0.427245	2152	3.09628	0.008	0.0479216	1
Macrophages	PTPRC	0.527021	368	4.10208	0.001	0.00903663	0.905
B_cells	PTPN7	0.51292	733	3.716	0.003	0.0181809	0.997
Monocytes	PTPN6	0.446242	1551	3.2907	0.005	0.0360932	1
Macrophages	PTPN22	-0.460087	1123	3.48195	0.004	0.0264577	1
Endothelial_cells	PTP4A1	-0.53398	411	4.0402	0.002	0.0100795	0.94
Macrophages	PTGS2	-0.440323	1508	3.30842	0.005	0.0350443	1
B_cells	PTGER4	0.456738	1717	3.234	0.006	0.0390553	1
Mast_cells	PTGER2	0.526417	1060	3.51105	0.004	0.0253794	1
Monocytes	PSTPIP2	0.529796	406	4.04389	0.002	0.0100795	0.94
Fibroblasts	PSPC1	0.431487	2301	3.06272	0.008	0.049629	1
Monocytes	PSME2	0.560624	240	4.34472	0.001	0.00568166	0.679
Macrophages	PSME1	0.59148	98	4.75957	0	0.00274825	0.259
Endothelial_cells	PSMD7	0.44898	1585	3.27872	0.005	0.0366965	1
B_cells	PSMC2	0.454949	1762	3.2192	0.006	0.0399103	1
Mast_cells	PSMB9	0.742915	17	5.74172	0	0.000122163	0.003
Monocytes	PSMB8	0.599184	103	4.74324	0	0.00280934	0.268
Monocytes	PSMB10	0.612965	75	4.89259	0	0.00205924	0.163
B_cells	PSMA6	0.44465	2022	3.13453	0.008	0.0453254	1
Endothelial_cells	PSIP1	0.535714	399	4.05668	0.002	0.00983557	0.934
Fibroblasts	PSEN2	0.475139	1238	3.42731	0.004	0.0288551	1
B_cells	PRRC2A	0.479741	1239	3.42723	0.004	0.0288551	1
Fibroblasts	PRRC1	-0.440564	2014	3.13707	0.008	0.0451549	1
Tumor	PRR7	-0.466351	1391	3.35242	0.005	0.0328709	1
B_cells	PRPS2	0.460746	1624	3.2673	0.005	0.0371172	1
B_cells	PRPF8	0.468517	1444	3.33228	0.005	0.0337811	1
B_cells	PRPF4B	0.453099	1804	3.20392	0.006	0.0409213	1
B_cells	PRPF31	0.512118	745	3.70887	0.003	0.0182891	0.998
B_cells	PRPF3	0.440086	2148	3.09733	0.008	0.0478258	1
Mast_cells	PROS1	-0.493016	1699	3.24022	0.006	0.0386646	1
T_cells	PRNP	-0.475342	1003	3.54403	0.004	0.0240357	1
Mast_cells	PRMT2	0.50253	1486	3.31611	0.005	0.0346164	1
Macrophages	PRKAG2-AS1	-0.486895	728	3.72388	0.003	0.0178275	0.997
T_cells	PRELID1	-0.449412	1481	3.31788	0.005	0.0345781	1
Macrophages	PRCP	0.458721	1144	3.46983	0.004	0.0271292	1
B_cells	PQLC3	0.520937	656	3.78774	0.002	0.0157287	0.994
Endothelial_cells	PQLC1	-0.436224	1900	3.17114	0.008	0.0431085	1
T_cells	PPWD1	0.486531	835	3.64381	0.003	0.0204727	1
Dendritic_cells	PPP6R1	0.455702	1346	3.37212	0.005	0.0318494	1
Macrophages	PPP4R1	-0.414497	2183	3.0872	0.008	0.0485528	1
Monocytes	PPP1R7	0.502521	654	3.78894	0.002	0.0157211	0.994
Monocytes	PPP1R15A	-0.461705	1242	3.42423	0.004	0.0290914	1
Macrophages	PPP1R14B	-0.564074	190	4.47152	0	0.00449237	0.535
Macrophages	PPP1R12A	0.436524	1598	3.27549	0.005	0.036758	1
Macrophages	PPP1R11	0.447153	1354	3.36795	0.005	0.0320733	1
Macrophages	PPP1CB	-0.434987	1639	3.26222	0.005	0.0373286	1
B_cells	PPM1K	0.511317	759	3.70175	0.003	0.0184264	0.998
B_cells	PPM1G	0.466173	1497	3.31262	0.005	0.0347823	1
B_cells	PPIP5K2	0.524391	617	3.8189	0.002	0.0149603	0.994
B_cells	PPIH	0.584274	224	4.38645	0.001	0.00524136	0.628
B_cells	PPIE	0.548443	410	4.04038	0.002	0.0100795	0.94
B_cells	PPID	0.53395	517	3.90597	0.002	0.0130043	0.981
Fibroblasts	PPFIBP2	0.455365	1652	3.2599	0.005	0.0373662	1
Endothelial_cells	PPFIBP1	0.438571	1840	3.19082	0.006	0.0417947	1
B_cells	PPCS	0.471107	1386	3.35408	0.005	0.0328215	1
Fibroblasts	PPA1	0.596728	156	4.564	0	0.00374347	0.441
Macrophages	POLR2H	-0.414966	2167	3.09117	0.008	0.0483624	1
Monocytes	POLK	0.480816	917	3.59268	0.003	0.0222911	1
Dendritic_cells	POLE3	0.426843	2045	3.12638	0.008	0.0459901	1
T_cells	PNRC2	0.465258	1180	3.45526	0.004	0.0276415	1
Macrophages	PNP	-0.499018	594	3.83599	0.002	0.0146201	0.99
B_cells	PNN	0.494172	995	3.55128	0.004	0.0236271	1
B_cells	PMPCA	0.566451	293	4.21172	0.001	0.00766805	0.815
Macrophages	PML	0.538718	290	4.21643	0.001	0.00764562	0.808
Tumor	PMAIP1	0.435823	2145	3.09815	0.008	0.0478156	1
Endothelial_cells	PLSCR1	0.578673	185	4.4795	0	0.00442522	0.52
B_cells	PLPBP	0.488807	1074	3.50489	0.004	0.0256502	1
Macrophages	PLP2	-0.43567	1618	3.26812	0.005	0.0371159	1
Macrophages	PLK3	-0.430419	1747	3.22288	0.006	0.0397547	1
Macrophages	PLIN2	-0.476565	866	3.62971	0.003	0.0207318	1
Endothelial_cells	PLEKHG5	-0.456378	1415	3.34183	0.005	0.0334665	1
B_cells	PLEKHG1	0.468147	1453	3.32917	0.005	0.033941	1
B_cells	PLEKHF2	0.509158	779	3.68261	0.003	0.0191699	0.999
Endothelial_cells	PLEKHA1	-0.463163	1291	3.40019	0.005	0.0302788	1
Endothelial_cells	PLEK2	-0.494082	793	3.67226	0.003	0.0194844	0.999
Mast_cells	PLEC	-0.502429	1492	3.3153	0.005	0.0346164	1
B_cells	PLD4	0.446377	1967	3.14866	0.008	0.0446341	1
Dendritic_cells	PLCD1	0.625738	51	5.03466	0	0.00168658	0.107
Macrophages	PLBD1	0.523862	390	4.07154	0.002	0.0095216	0.925
Macrophages	PLAUR	-0.502945	563	3.87269	0.002	0.0135672	0.986
Macrophages	PLAU	-0.522539	398	4.05878	0.002	0.00978027	0.934
B_cells	PLAC8	0.494295	994	3.55235	0.004	0.0235819	1
Macrophages	PLA2G2D	0.493298	660	3.78287	0.002	0.0159386	0.995
Macrophages	PKN2	0.433877	1668	3.25264	0.005	0.0378939	1
Macrophages	PKM	-0.491334	681	3.76473	0.003	0.0164355	0.995
Dendritic_cells	PITPNB	0.41964	2273	3.06622	0.008	0.049629	1
B_cells	PIN4	0.46235	1576	3.28066	0.005	0.0366466	1
B_cells	PILRB	0.460253	1635	3.26319	0.005	0.0373276	1
Macrophages	PIK3CD	0.437036	1579	3.27993	0.005	0.0366466	1
Monocytes	PIGBOS1	0.576279	173	4.50329	0	0.00430073	0.501
B_cells	PIGB	0.548381	413	4.0398	0.002	0.0100795	0.94
Monocytes	PICALM	-0.442881	1642	3.26198	0.005	0.037335	1
B_cells	PIBF1	0.460191	1638	3.26268	0.005	0.0373286	1
B_cells	PIAS1	0.446562	1962	3.15018	0.008	0.0445508	1
B_cells	PHYKPL	0.515634	711	3.74019	0.003	0.0172509	0.995
Fibroblasts	PHPT1	-0.527983	532	3.89601	0.002	0.0131736	0.983
T_cells	PHLDA2	-0.570132	202	4.44053	0.001	0.00466361	0.568
Macrophages	PHLDA1	-0.573167	155	4.56558	0	0.00374347	0.44
Macrophages	PHF3	0.479723	814	3.65837	0.003	0.0199157	0.999
Endothelial_cells	PHF19	-0.482041	969	3.56506	0.003	0.0231396	1
Monocytes	PHF11	0.497143	712	3.73979	0.003	0.0172509	0.995
B_cells	PHC3	0.500586	896	3.60717	0.003	0.0216762	1
Macrophages	PHC2	-0.449244	1316	3.38627	0.005	0.0310454	1
Macrophages	PGK1	-0.534534	318	4.1753	0.001	0.00804962	0.841
B_cells	PGGT1B	0.530558	557	3.87493	0.002	0.0135672	0.986
Endothelial_cells	PGF	-0.448265	1608	3.27266	0.005	0.0368169	1
Macrophages	PGAM1	-0.531717	335	4.14775	0.001	0.00831724	0.864
T_cells	PFKFB3	-0.433854	1855	3.18537	0.008	0.04221	1
B_cells	PEX2	0.46309	1559	3.28683	0.005	0.036356	1
B_cells	PEX11B	0.477151	1282	3.4052	0.005	0.0299855	1
Tumor	PET117	-0.460569	1519	3.30358	0.005	0.0353456	1
Macrophages	PERP	-0.435627	1619	3.26775	0.005	0.0371159	1
Macrophages	PEPD	0.489712	699	3.74977	0.003	0.0169479	0.995
Tumor	PELI1	0.431892	2275	3.06602	0.008	0.049629	1
Macrophages	PDPN	-0.452403	1256	3.41403	0.004	0.0297246	1
Dendritic_cells	PDPK1	0.493061	755	3.70272	0.003	0.0184264	0.998
Macrophages	PDLIM7	-0.493341	659	3.78326	0.002	0.0159303	0.995
B_cells	PDLIM2	0.436078	2285	3.0648	0.008	0.049629	1
B_cells	PDLIM1	0.455689	1742	3.22532	0.006	0.0395702	1
Macrophages	PDK1	-0.685691	16	5.87844	0	4.33e-05	0.001
Endothelial_cells	PDIA3	0.547755	321	4.17228	0.001	0.00805905	0.844
B_cells	PDHB	0.441875	2099	3.11189	0.008	0.0468642	1
B_cells	PDHA1	0.53543	503	3.91956	0.002	0.0127559	0.979
Endothelial_cells	PDGFB	-0.431684	2028	3.13319	0.008	0.0454322	1
Macrophages	PDE8A	-0.595236	92	4.80016	0	0.00253336	0.229
Fibroblasts	PDE7A	-0.492946	935	3.58159	0.003	0.0226402	1
Dendritic_cells	PDE4A	-0.499256	690	3.75905	0.003	0.0165981	0.995
B_cells	PDCD2	0.474992	1314	3.3869	0.005	0.0310454	1
Macrophages	PDCD1LG2	0.441006	1496	3.31435	0.005	0.0346303	1
Macrophages	PCSK7	0.481858	785	3.67781	0.003	0.0193243	0.999
Monocytes	PCMTD1	0.47904	945	3.57685	0.003	0.0228188	1
B_cells	PCK2	0.449152	1897	3.17142	0.008	0.0430908	1
Macrophages	PCGF2	-0.488773	710	3.74113	0.003	0.0172332	0.995
Macrophages	PCGF1	-0.434304	1659	3.25632	0.005	0.0376242	1
B_cells	PATL2	0.546099	422	4.01844	0.002	0.0106884	0.951
B_cells	PARVG	0.46161	1601	3.27449	0.005	0.036758	1
Macrophages	PARVB	-0.601212	83	4.86531	0	0.00221855	0.184
Endothelial_cells	PARP9	0.455918	1423	3.3379	0.005	0.0336841	1
Macrophages	PARP4	0.471783	927	3.58653	0.003	0.0225304	1
Monocytes	PARP14	0.607203	86	4.82966	0	0.00249534	0.212
B_cells	PARP1	0.463953	1541	3.29404	0.005	0.0358627	1
Fibroblasts	PAPLN	0.497456	875	3.62122	0.003	0.0211213	1
Macrophages	PANK2	0.470332	952	3.57348	0.003	0.0229273	1
Monocytes	PAK1	0.508379	591	3.84288	0.002	0.014357	0.99
Dendritic_cells	PACSIN1	0.424442	2116	3.10628	0.008	0.0472429	1
Endothelial_cells	PABPN1	-0.495408	776	3.68418	0.003	0.0191363	0.999
Dendritic_cells	PABPC1	0.50473	629	3.80923	0.002	0.0151495	0.994
Macrophages	P4HA1	-0.585631	114	4.69694	0	0.00303621	0.304
B_cells	P2RY8	0.500894	890	3.60986	0.003	0.021613	1
Macrophages	P2RY13	0.551182	244	4.34055	0.001	0.00571394	0.679
Macrophages	P2RX4	-0.440664	1501	3.31138	0.005	0.0348257	1
B_cells	OTUD6B-AS1	0.516127	706	3.7446	0.003	0.0171142	0.995
Dendritic_cells	OSTM1	0.419016	2311	3.06103	0.008	0.0497138	1
Tumor	OST4	-0.463807	1448	3.33089	0.005	0.0338837	1
B_cells	OSGEP	0.518717	675	3.76779	0.003	0.0164255	0.995
Macrophages	OSER1	-0.537138	302	4.20087	0.001	0.00771337	0.823
Endothelial_cells	ORAI2	-0.446633	1654	3.25881	0.005	0.0374454	1
Endothelial_cells	OPTN	0.442245	1752	3.22173	0.006	0.0398319	1
B_cells	OMA1	0.455072	1758	3.22022	0.006	0.0398568	1
Monocytes	OLR1	-0.465258	1179	3.45526	0.004	0.0276415	1
Fibroblasts	OLFML1	0.482308	1104	3.48901	0.004	0.0262756	1
B_cells	OGFR	0.503546	858	3.63312	0.003	0.0206751	1
B_cells	OGFOD3	0.501819	880	3.61797	0.003	0.0212837	1
Endothelial_cells	ODF3B	0.501735	709	3.74128	0.003	0.0172332	0.995
Mast_cells	ODF2L	0.502429	1491	3.3153	0.005	0.0346164	1
B_cells	OCEL1	0.459019	1667	3.25294	0.005	0.0378863	1
Monocytes	OAS1	0.502713	650	3.7907	0.002	0.0156649	0.994
T_cells	NXT1	-0.497815	704	3.74591	0.003	0.0170638	0.995
Endothelial_cells	NUPR1	0.423061	2307	3.06164	0.008	0.049707	1
Monocytes	NUP93	0.479712	932	3.58283	0.003	0.0226402	1
B_cells	NUP88	0.567314	289	4.22006	0.001	0.00757887	0.808
Monocytes	NUP58	-0.423577	2140	3.09906	0.008	0.047774	1
B_cells	NUP37	0.459883	1651	3.26011	0.005	0.037352	1
B_cells	NUMB	0.457848	1691	3.24321	0.006	0.0384913	1
B_cells	NUMA1	0.478261	1255	3.41463	0.004	0.0297195	1
B_cells	NUDT4	0.470737	1397	3.35096	0.005	0.0328932	1
Tumor	NUDT22	-0.440102	2027	3.13326	0.008	0.0454322	1
Dendritic_cells	NUDCD3	0.560912	238	4.34761	0.001	0.00568166	0.674
B_cells	NUCB1	0.438298	2204	3.0828	0.008	0.0488074	1
Macrophages	NUB1	0.476052	871	3.62507	0.003	0.0209748	1
B_cells	NT5E	0.490842	1037	3.52245	0.004	0.0250032	1
B_cells	NSUN5	0.474129	1332	3.37959	0.005	0.0314305	1
Macrophages	NSUN4	0.5108	473	3.94668	0.002	0.0123766	0.975
Monocytes	NSMCE4A	0.55054	279	4.24472	0.001	0.00720044	0.793
T_cells	NSMCE1	-0.460456	1260	3.41336	0.004	0.0297472	1
Dendritic_cells	NSA2	0.442017	1663	3.25462	0.005	0.0377562	1
Endothelial_cells	NRN1	0.425306	2216	3.08021	0.008	0.0489339	1
Macrophages	NRIP3	-0.45394	1237	3.42756	0.004	0.0288551	1
Macrophages	NRBF2	0.412661	2251	3.0717	0.008	0.0494058	1
Macrophages	NRAS	-0.581661	120	4.65479	0	0.00338811	0.341
B_cells	NR3C1	0.497502	941	3.58024	0.003	0.0226884	1
Endothelial_cells	NR2F1	0.508061	637	3.79887	0.002	0.0155152	0.994
B_cells	NR1H2	0.439901	2155	3.09582	0.008	0.0479509	1
B_cells	NPRL3	0.543447	440	3.99371	0.002	0.0112428	0.961
Dendritic_cells	NPC1	0.433758	1857	3.18456	0.008	0.0422887	1
Neutrophils	NOTCH1	0.561661	2098	3.1121	0.008	0.0468486	1
B_cells	NOP56	0.495097	984	3.55931	0.004	0.0232827	1
Fibroblasts	NOP10	-0.458141	1571	3.28316	0.005	0.0365221	1
Macrophages	NOL8	0.435072	1637	3.26295	0.005	0.0373276	1
Macrophages	NOL3	-0.426876	1835	3.19249	0.006	0.0417182	1
Monocytes	NOC2L	0.519232	477	3.94397	0.002	0.0123766	0.976
B_cells	NOB1	0.462226	1582	3.27963	0.005	0.0366466	1
B_cells	NNT	0.550416	397	4.05891	0.002	0.00978027	0.934
Endothelial_cells	NMI	0.622551	64	4.9454	0	0.0020335	0.141
Macrophages	NME6	0.426705	1838	3.19103	0.006	0.0417947	1
Macrophages	NMB	-0.485486	742	3.71096	0.003	0.018258	0.997
Macrophages	NLRP3	-0.447921	1343	3.37468	0.005	0.0316844	1
Mast_cells	NLRC5	0.505061	1429	3.33646	0.005	0.0337068	1
Monocytes	NKAP	0.542761	322	4.16866	0.001	0.00814582	0.848
B_cells	NIPA2	0.435831	2298	3.0628	0.008	0.049629	1
Monocytes	NGRN	0.540504	338	4.14676	0.001	0.00831724	0.866
B_cells	NGLY1	0.497379	942	3.57916	0.003	0.0227123	1
B_cells	NGDN	0.497626	938	3.58131	0.003	0.0226402	1
B_cells	NFX1	0.447302	1941	3.15624	0.008	0.0441503	1
Macrophages	NFE2L3	0.460343	1119	3.48423	0.004	0.0263886	1
B_cells	NFATC3	0.471724	1373	3.35928	0.005	0.0325773	1
B_cells	NEPRO	0.453839	1785	3.21003	0.006	0.0404969	1
B_cells	NELFCD	0.436756	2255	3.07029	0.008	0.0494907	1
B_cells	NEK9	0.589084	209	4.43455	0.001	0.00466361	0.575
Dendritic_cells	NEK8	0.442785	1643	3.26117	0.005	0.037352	1
T_cells	NEDD9	-0.429244	1974	3.14653	0.008	0.0447845	1
Macrophages	NECAP2	0.504909	539	3.89111	0.002	0.0132054	0.985
Mast_cells	NEAT1	-0.474089	2163	3.09199	0.008	0.0483369	1
B_cells	NDUFV2	0.518594	678	3.76669	0.003	0.0164255	0.995
B_cells	NDUFV1	0.555843	360	4.11019	0.001	0.0089437	0.895
Tumor	NDUFB10	-0.463228	1463	3.326	0.005	0.0340804	1
Tumor	NDUFAF8	-0.478839	1171	3.45909	0.004	0.0274606	1
B_cells	NDUFAF3	0.559174	343	4.14188	0.001	0.00836559	0.868
Mast_cells	NDUFA4	-0.487247	1830	3.19466	0.006	0.0415296	1
Tumor	NDRG3	-0.463691	1451	3.32991	0.005	0.0339105	1
Macrophages	NDRG1	-0.414027	2201	3.08323	0.008	0.0487862	1
B_cells	NDEL1	0.438236	2205	3.0823	0.008	0.0488337	1
B_cells	NCR3	0.43799	2215	3.08029	0.008	0.0489323	1
Mast_cells	NCOR2	-0.491599	1731	3.229	0.006	0.0393561	1
B_cells	NCOR1	0.452112	1824	3.19578	0.006	0.0415258	1
Monocytes	NCOA7	0.543337	319	4.17426	0.001	0.00804962	0.843
Macrophages	NCOA4	0.485742	736	3.71331	0.003	0.018258	0.997
Macrophages	NCOA1	0.462819	1072	3.50625	0.004	0.025543	1
Endothelial_cells	NCLN	-0.426888	2158	3.09332	0.008	0.0482695	1
Macrophages	NCKAP1L	0.43742	1570	3.28325	0.005	0.0365193	1
B_cells	NCF4	0.44798	1923	3.1618	0.008	0.043859	1
B_cells	NCF1	0.444588	2024	3.13403	0.008	0.0454142	1
B_cells	NCBP3	0.481961	1202	3.44617	0.004	0.0279255	1
Dendritic_cells	NARF	-0.444514	1594	3.27592	0.005	0.036758	1
Fibroblasts	NAPRT	0.457331	1593	3.27637	0.005	0.036758	1
B_cells	NAPA	0.531113	549	3.88	0.002	0.0135216	0.986
T_cells	NAMPT	-0.46449	1197	3.44854	0.004	0.0278336	1
Macrophages	NAGPA	0.443183	1441	3.33329	0.005	0.033774	1
B_cells	NADSYN1	0.435399	2318	3.05931	0.008	0.0498247	1
Monocytes	NADK	0.435006	1826	3.19511	0.006	0.0415258	1
Monocytes	NACC2	0.466507	1152	3.46619	0.004	0.0272378	1
Macrophages	NAAA	0.522582	396	4.05919	0.002	0.00978027	0.934
Monocytes	MYOF	0.56096	237	4.34809	0.001	0.00568166	0.673
B_cells	MYO1F	0.447302	1942	3.15624	0.008	0.0441503	1
Endothelial_cells	MYO1B	-0.457806	1385	3.35408	0.005	0.0328215	1
Endothelial_cells	MYO19	-0.440204	1800	3.20454	0.006	0.0408907	1
Dendritic_cells	MYO18A	0.457383	1315	3.38667	0.005	0.0310454	1
Macrophages	MYL6B	-0.524972	385	4.08225	0.002	0.0092834	0.919
Macrophages	MYD88	0.462307	1076	3.50169	0.004	0.0258521	1
Macrophages	MYCBP2	0.443183	1440	3.33329	0.005	0.033774	1
Macrophages	MXI1	-0.625971	46	5.14335	0	0.00117831	0.068
Endothelial_cells	MX1	0.431633	2030	3.13277	0.008	0.0454794	1
Monocytes	MVP	0.596062	108	4.70995	0	0.00303621	0.298
Macrophages	MUCL1	-0.468881	977	3.56044	0.003	0.0232596	1
Mast_cells	MTX2	0.493927	1685	3.24745	0.006	0.0381385	1
B_cells	MTRNR2L12	0.50922	778	3.68316	0.003	0.0191699	0.999
Macrophages	MTMR3	-0.441048	1495	3.31472	0.005	0.0346164	1
Dendritic_cells	MTMR1	0.475438	999	3.54488	0.004	0.0240357	1
B_cells	MTHFS	0.592969	189	4.4737	0	0.00446486	0.532
Dendritic_cells	MTHFD2	-0.498487	696	3.75204	0.003	0.0168956	0.995
B_cells	MTDH	0.438051	2214	3.08079	0.008	0.0488903	1
Endothelial_cells	MTA1	-0.442653	1743	3.22517	0.006	0.039584	1
Macrophages	MT1X	-0.576411	143	4.5995	0	0.00352377	0.397
Macrophages	MT1G	-0.468795	983	3.55968	0.004	0.0232613	1
Macrophages	MT1F	-0.465551	1021	3.53063	0.004	0.0247153	1
Macrophages	MT1E	-0.575899	146	4.59413	0	0.00357507	0.407
Fibroblasts	MSRB1	-0.476411	1221	3.43822	0.004	0.0282299	1
Mast_cells	MSRA	-0.492915	1704	3.23942	0.006	0.0386919	1
Macrophages	MS4A6A	0.436011	1613	3.27107	0.005	0.0368937	1
B_cells	MRTO4	0.532655	535	3.8941	0.002	0.013198	0.984
B_cells	MRRF	0.439531	2160	3.09281	0.008	0.0482761	1
B_cells	MRPS9	0.511563	752	3.70394	0.003	0.0184264	0.998
Endothelial_cells	MRPS7	0.434745	1933	3.15875	0.008	0.0440441	1
Mast_cells	MRPS33	0.502024	1500	3.31205	0.005	0.0348257	1
B_cells	MRPS23	0.564847	306	4.19626	0.001	0.00774828	0.826
Fibroblasts	MRPS22	0.471554	1301	3.39667	0.005	0.0304411	1
B_cells	MRPS2	0.527536	587	3.84741	0.002	0.014206	0.989
B_cells	MRPS18C	0.490595	1041	3.52032	0.004	0.0250934	1
Dendritic_cells	MRPS18B	0.504346	632	3.80569	0.002	0.0152822	0.994
Fibroblasts	MRPS12	-0.505782	768	3.69502	0.003	0.0186197	0.998
B_cells	MRPL58	0.46716	1473	3.32089	0.005	0.0344045	1
Dendritic_cells	MRPL55	-0.469244	1099	3.49021	0.004	0.0262743	1
Macrophages	MRPL52	-0.635875	40	5.25852	0	0.000848012	0.044
Monocytes	MRPL50	0.487107	831	3.64899	0.003	0.0202095	1
B_cells	MRPL49	0.448905	1903	3.1694	0.008	0.0432665	1
Endothelial_cells	MRPL46	0.476939	1042	3.52013	0.004	0.0250977	1
Monocytes	MRPL44	0.454118	1375	3.35842	0.005	0.032612	1
Macrophages	MRPL41	-0.469734	961	3.56811	0.003	0.0231376	1
B_cells	MRPL38	0.484428	1147	3.46727	0.004	0.0272378	1
Monocytes	MRPL27	0.541849	328	4.1598	0.001	0.00820786	0.85
B_cells	MRPL19	0.440888	2124	3.10385	0.008	0.0473981	1
Monocytes	MRPL18	0.45431	1371	3.36008	0.005	0.0325188	1
Endothelial_cells	MRPL16	0.475765	1066	3.50983	0.004	0.0253965	1
B_cells	MRPL11	0.556892	357	4.12015	0.001	0.0087259	0.887
B_cells	MRFAP1L1	0.46198	1590	3.27757	0.005	0.0367073	1
Endothelial_cells	MRC1	0.45398	1472	3.32132	0.005	0.0343682	1
Macrophages	MR1	0.440024	1513	3.30582	0.005	0.0352199	1
B_cells	MPRIP	0.489423	1065	3.51021	0.004	0.0253794	1
Macrophages	MPHOSPH8	0.529924	348	4.13028	0.001	0.00859152	0.876
T_cells	MPG	-0.459592	1279	3.40585	0.005	0.0299855	1
Dendritic_cells	MPEG1	0.528643	417	4.03291	0.002	0.0102444	0.941
Macrophages	MPC1	0.448391	1335	3.37879	0.005	0.03146	1
Dendritic_cells	MOB3B	-0.439616	1716	3.23419	0.006	0.0390553	1
B_cells	MNAT1	0.456429	1723	3.23145	0.006	0.0392267	1
B_cells	MMS19	0.487018	1103	3.4895	0.004	0.0262743	1
Endothelial_cells	MMRN1	0.592704	129	4.62436	0	0.00352377	0.376
Macrophages	MMP25	0.419961	2026	3.13351	0.008	0.0454322	1
B_cells	MMP24OS	0.467037	1476	3.31986	0.005	0.0344533	1
Endothelial_cells	MMP15	-0.469235	1186	3.45281	0.004	0.0277042	1
Endothelial_cells	MMP14	-0.510306	615	3.81943	0.002	0.0149603	0.994
B_cells	MLX	0.492569	1008	3.53738	0.004	0.0244263	1
Tumor	MLST8	-0.472017	1290	3.40061	0.005	0.0302788	1
Fibroblasts	MLLT11	-0.43935	2043	3.12708	0.008	0.0459245	1
B_cells	MKL1	0.506383	815	3.65809	0.003	0.0199157	0.999
Macrophages	MIS18BP1	0.573679	153	4.57092	0	0.00374347	0.437
Macrophages	MIR4435-2HG	-0.417143	2105	3.1096	0.008	0.0470003	1
Macrophages	MIR210HG	-0.616409	52	5.03435	0	0.00168658	0.107
Macrophages	MIR155HG	-0.505165	537	3.89352	0.002	0.013198	0.984
Macrophages	MIOS	-0.4244	1899	3.17133	0.008	0.0431085	1
Tumor	MINCR	-0.437095	2108	3.10857	0.008	0.0470828	1
B_cells	MILR1	0.472464	1358	3.36552	0.005	0.0322515	1
Macrophages	MIIP	0.480876	796	3.66886	0.003	0.019626	0.999
Monocytes	MIF4GD	0.439232	1725	3.23092	0.006	0.0392823	1
Macrophages	MIF	-0.748741	3	6.79058	0	0	0
Endothelial_cells	MIER1	0.432959	1981	3.14383	0.008	0.0449338	1
Endothelial_cells	MICALL2	-0.480816	988	3.55425	0.004	0.0235794	1
Macrophages	MICAL2	-0.479126	820	3.65294	0.003	0.0201254	0.999
Dendritic_cells	MIA3	0.429244	1975	3.14653	0.008	0.0447845	1
Macrophages	MIA2	0.471741	928	3.58615	0.003	0.0225304	1
B_cells	MGA	0.532593	536	3.89353	0.002	0.013198	0.984
B_cells	MFSD5	0.609436	125	4.64282	0	0.00341732	0.353
Fibroblasts	MFAP4	0.478723	1176	3.45809	0.004	0.0274606	1
Tumor	METTL26	-0.481036	1135	3.47802	0.004	0.0265911	1
Mast_cells	METTL15	0.473279	2192	3.08573	0.008	0.0486443	1
Macrophages	METRNL	-0.601981	80	4.87373	0	0.00216223	0.175
B_cells	MEPCE	0.449522	1887	3.17446	0.008	0.0429249	1
B_cells	MEF2D	0.543139	441	3.99084	0.002	0.0113382	0.962
Monocytes	MED28	0.446242	1550	3.2907	0.005	0.0360932	1
Fibroblasts	MED19	0.498612	862	3.63142	0.003	0.0207318	1
B_cells	MED13	0.487142	1098	3.49056	0.004	0.0262743	1
B_cells	MED11	0.530805	551	3.87718	0.002	0.0135672	0.986
Mast_cells	ME2	0.475304	2135	3.1014	0.008	0.0475516	1
Macrophages	ME1	0.571587	163	4.54914	0	0.00379678	0.452
Tumor	MDP1	-0.450509	1760	3.21937	0.006	0.0399103	1
Monocytes	MCTS1	0.456567	1330	3.3796	0.005	0.0314305	1
Monocytes	MCRS1	0.477167	982	3.56021	0.003	0.0232596	1
B_cells	MCM3AP	0.519334	667	3.77333	0.002	0.0163162	0.995
B_cells	MCM3	0.459513	1658	3.25704	0.005	0.0375888	1
Endothelial_cells	MCAM	-0.496429	770	3.69336	0.003	0.0186738	0.998
B_cells	MBD1	0.49522	979	3.56038	0.003	0.0232596	1
Dendritic_cells	MB21D2	-0.441537	1673	3.25053	0.006	0.0380471	1
Endothelial_cells	MAZ	-0.527959	449	3.98334	0.002	0.0114045	0.965
Macrophages	MAX	0.566465	177	4.49611	0	0.00433916	0.509
B_cells	MAT2B	0.534135	513	3.90766	0.002	0.0130043	0.981
Dendritic_cells	MAST3	0.44922	1484	3.31623	0.005	0.0346164	1
B_cells	MARS	0.60555	140	4.60244	0	0.00352377	0.394
Monocytes	MAPKAPK3	0.426267	2060	3.12155	0.008	0.0463391	1
Macrophages	MAPK13	-0.441091	1493	3.31509	0.005	0.0346164	1
B_cells	MAP4K5	0.453839	1784	3.21003	0.006	0.0404969	1
Fibroblasts	MAP3K8	0.4645	1427	3.33675	0.005	0.0337068	1
Macrophages	MAP2K3	-0.52382	391	4.07113	0.002	0.0095216	0.926
Endothelial_cells	MAP2K1	-0.516224	559	3.87392	0.002	0.0135672	0.986
Fibroblasts	MAOB	0.438367	2070	3.11901	0.008	0.0464111	1
Monocytes	MAN2B1	0.495222	730	3.72232	0.003	0.0178848	0.997
B_cells	MAN1B1	0.46864	1439	3.33332	0.005	0.033774	1
B_cells	MALT1	0.47271	1357	3.36761	0.005	0.0320733	1
Macrophages	MAF1	0.432383	1702	3.23977	0.006	0.0386646	1
B_cells	MACF1	0.497626	939	3.58131	0.003	0.0226402	1
B_cells	LZIC	0.528091	580	3.85246	0.002	0.0141048	0.987
Macrophages	LYZ	0.434389	1657	3.25706	0.005	0.0375888	1
Macrophages	LYSMD2	0.587936	106	4.72155	0	0.00298899	0.288
B_cells	LYRM2	0.439223	2172	3.09031	0.008	0.0484001	1
Dendritic_cells	LY9	0.493878	743	3.71011	0.003	0.0182725	0.997
Monocytes	LY6E	0.470252	1079	3.49908	0.004	0.0259842	1
Fibroblasts	LXN	0.433858	2207	3.08207	0.008	0.0488337	1
Macrophages	LUCAT1	-0.525143	383	4.0839	0.002	0.00927874	0.917
Dendritic_cells	LUC7L3	0.458727	1297	3.39834	0.005	0.0303519	1
B_cells	LTV1	0.468825	1434	3.33487	0.005	0.0337399	1
B_cells	LTBP3	0.444835	2017	3.13605	0.008	0.0452576	1
Macrophages	LST1	0.567831	171	4.51021	0	0.00424664	0.489
Fibroblasts	LSM4	-0.554579	340	4.14558	0.001	0.00831724	0.867
Macrophages	LSM12	-0.443311	1435	3.33441	0.005	0.0337685	1
Macrophages	LRRK1	0.437207	1573	3.2814	0.005	0.0366466	1
Macrophages	LRRC61	0.491249	683	3.76394	0.003	0.0164355	0.995
Dendritic_cells	LRRC47	0.436351	1793	3.20649	0.006	0.0407729	1
B_cells	LRP10	0.561394	325	4.1631	0.001	0.00818215	0.849
B_cells	LRCH3	0.459883	1650	3.26011	0.005	0.037352	1
Macrophages	LPCAT3	0.470588	947	3.57578	0.003	0.0228575	1
B_cells	LPAR5	0.538945	471	3.95196	0.002	0.012199	0.974
Endothelial_cells	LOXL2	-0.469847	1175	3.45813	0.004	0.0274606	1
Tumor	LOXL1	-0.43513	2161	3.09247	0.008	0.0483195	1
B_cells	LONP2	0.536725	490	3.93148	0.002	0.0125635	0.977
Macrophages	LONP1	-0.477418	852	3.63744	0.003	0.0205426	1
Macrophages	LNPK	-0.523564	393	4.06866	0.002	0.00955769	0.927
Fibroblasts	LMO4	0.459759	1533	3.29677	0.005	0.0357689	1
Monocytes	LMBR1L	0.419832	2268	3.06782	0.008	0.0496142	1
Endothelial_cells	LMAN2	0.442959	1737	3.22775	0.006	0.039382	1
B_cells	LIPA	0.440826	2128	3.10335	0.008	0.0474058	1
B_cells	LINC02446	0.441505	2107	3.10887	0.008	0.0470828	1
B_cells	LINC02397	0.450385	1866	3.18156	0.008	0.0424913	1
Endothelial_cells	LINC02256	0.531939	421	4.02087	0.002	0.0106239	0.948
B_cells	LINC01871	0.496022	962	3.56735	0.003	0.0231396	1
T_cells	LINC01588	-0.463145	1222	3.43679	0.004	0.0283422	1
Endothelial_cells	LINC01558	0.436939	1878	3.17712	0.008	0.0427937	1
T_cells	LINC01550	0.496567	714	3.73454	0.003	0.0175078	0.995
Macrophages	LINC00996	0.486297	732	3.71839	0.003	0.0180431	0.997
B_cells	LINC00324	0.554363	374	4.09616	0.001	0.00910852	0.91
Tumor	LIN7B	-0.486124	1039	3.52207	0.004	0.0250051	1
Macrophages	LIMD2	0.638692	34	5.29173	0	0.000728689	0.037
B_cells	LILRA4	0.438668	2191	3.0858	0.008	0.0486389	1
Endothelial_cells	LIG1	-0.425867	2195	3.08486	0.008	0.0486959	1
Tumor	LGR4	-0.432875	2240	3.07404	0.008	0.0493045	1
Monocytes	LGALS9	0.616375	68	4.93016	0	0.0020564	0.151
Fibroblasts	LGALS3BP	0.671369	27	5.39437	0	0.000564059	0.021
Dendritic_cells	LGALS2	0.601537	97	4.76846	0	0.00273334	0.253
Macrophages	LGALS1	-0.718945	9	6.3382	0	0	0
Tumor	LEPROTL1	-0.48728	1016	3.53212	0.004	0.0246995	1
B_cells	LENG8	0.46161	1602	3.27449	0.005	0.036758	1
Macrophages	LDHA	-0.603603	76	4.89157	0	0.00205924	0.164
B_cells	LCOR	0.474807	1319	3.38533	0.005	0.0310953	1
B_cells	LBH	0.540857	460	3.96965	0.002	0.0117036	0.97
Macrophages	LAT	-0.442542	1458	3.32772	0.005	0.0339788	1
B_cells	LASP1	0.458403	1682	3.24782	0.006	0.0381385	1
B_cells	LARP7	0.486833	1106	3.48791	0.004	0.0263181	1
Monocytes	LARP1	0.520336	468	3.95435	0.002	0.0121277	0.974
Macrophages	LAP3	0.601639	82	4.86999	0	0.00219495	0.18
Fibroblasts	LAMTOR5	-0.496994	882	3.61715	0.003	0.0212951	1
B_cells	LAMTOR3	0.436078	2284	3.0648	0.008	0.049629	1
Macrophages	LAMP3	0.438871	1536	3.29582	0.005	0.0357865	1
Endothelial_cells	LAMC1	-0.434898	1931	3.16003	0.008	0.043925	1
T_cells	LAIR2	-0.450276	1464	3.32531	0.005	0.0340996	1
Macrophages	LAGE3	-0.456416	1193	3.44942	0.004	0.0278118	1
Endothelial_cells	LACTB2	0.569796	222	4.38966	0.001	0.00522621	0.623
B_cells	L3MBTL3	0.492322	1011	3.53525	0.004	0.0245809	1
B_cells	KYNU	0.449769	1881	3.17649	0.008	0.0427937	1
T_cells	KRT86	-0.423001	2157	3.09424	0.008	0.0481427	1
T_cells	KRT81	-0.442689	1648	3.26035	0.005	0.037352	1
Neutrophils	KPNB1	0.572344	1848	3.18925	0.008	0.0418398	1
B_cells	KPNA5	0.564477	307	4.1927	0.001	0.00783127	0.827
Fibroblasts	KPNA4	-0.444611	1901	3.17045	0.008	0.0431554	1
B_cells	KMT2A	0.462473	1572	3.28169	0.005	0.0366406	1
B_cells	KMO	0.608634	128	4.63446	0	0.00349913	0.368
Macrophages	KLHL7	-0.489029	707	3.74349	0.003	0.0171546	0.995
B_cells	KLHL28	0.529078	571	3.86144	0.002	0.0138884	0.987
Endothelial_cells	KLHL21	-0.445612	1675	3.25017	0.006	0.0380513	1
B_cells	KLHL18	0.437805	2219	3.07879	0.008	0.049088	1
B_cells	KLHDC3	0.484305	1150	3.46621	0.004	0.0272378	1
Monocytes	KLF3	0.428091	2016	3.13685	0.008	0.0451871	1
T_cells	KLF12	0.478511	954	3.57215	0.003	0.0229823	1
Monocytes	KLF10	-0.468331	1122	3.4822	0.004	0.0264577	1
Endothelial_cells	KLC1	-0.46898	1190	3.45059	0.004	0.0277959	1
Macrophages	KIFC3	-0.541279	281	4.24174	0.001	0.00720832	0.794
Macrophages	KIFAP3	0.516136	438	3.99741	0.002	0.0111108	0.96
B_cells	KIF20B	0.469504	1417	3.34058	0.005	0.0335485	1
Endothelial_cells	KIF1C	-0.439847	1810	3.20154	0.006	0.0410794	1
Endothelial_cells	KIF1B	-0.448367	1607	3.27353	0.005	0.036758	1
Macrophages	KIF13B	0.58132	122	4.65118	0	0.00338811	0.346
Dendritic_cells	KIAA1109	0.448643	1502	3.31129	0.005	0.0348257	1
Dendritic_cells	KIAA0100	0.477887	965	3.5666	0.003	0.0231396	1
Monocytes	KIAA0040	0.541128	332	4.15281	0.001	0.00830497	0.863
Monocytes	KEAP1	0.431645	1907	3.16674	0.008	0.0435427	1
Dendritic_cells	KDM5B	-0.438271	1749	3.22277	0.006	0.0397573	1
B_cells	KDM4C	0.455628	1744	3.22481	0.006	0.0395906	1
Endothelial_cells	KCNQ1	-0.43051	2055	3.12342	0.008	0.0461675	1
Monocytes	KCNMB1	0.485906	850	3.63821	0.003	0.020526	1
Macrophages	KCNMA1	0.57846	131	4.62101	0	0.00352377	0.377
B_cells	KATNBL1	0.587851	211	4.42218	0.001	0.00485235	0.591
B_cells	KAT5	0.459266	1661	3.25499	0.005	0.0377362	1
Macrophages	JUND	-0.432084	1709	3.23719	0.006	0.0388323	1
T_cells	JOSD1	-0.452485	1410	3.34433	0.005	0.0333515	1
B_cells	JAZF1	0.478878	1246	3.41988	0.004	0.0294253	1
Macrophages	JAML	0.479126	822	3.65294	0.003	0.0201254	0.999
Endothelial_cells	JAM2	0.449796	1564	3.28566	0.005	0.03639	1
Macrophages	JAK2	0.724409	7	6.41802	0	0	0
Endothelial_cells	IVNS1ABP	-0.428112	2126	3.10348	0.008	0.0473981	1
B_cells	IVD	0.438976	2180	3.0883	0.008	0.0485013	1
Monocytes	ITSN2	0.56581	218	4.3968	0.001	0.00517155	0.615
Endothelial_cells	ITPR1	0.447143	1636	3.26314	0.005	0.0373276	1
Fibroblasts	ITM2B	0.51376	679	3.76653	0.003	0.0164255	0.995
T_cells	ITGB2-AS1	0.517023	499	3.92327	0.002	0.0127019	0.979
B_cells	ITGB2	0.50885	783	3.67988	0.003	0.0192708	0.999
Endothelial_cells	ITGB1	-0.479898	997	3.54615	0.004	0.0240005	1
Macrophages	ITGAM	-0.514343	452	3.98032	0.002	0.0114474	0.966
Dendritic_cells	ITGAL	0.509052	585	3.8491	0.002	0.0141764	0.988
Macrophages	ITGA5	-0.55639	220	4.39313	0.001	0.00517155	0.619
B_cells	ITGA4	0.514154	726	3.72698	0.003	0.0176544	0.997
Endothelial_cells	ITGA2	-0.444388	1701	3.23982	0.006	0.0386646	1
B_cells	ITFG2	0.491952	1018	3.53205	0.004	0.0246995	1
B_cells	ITFG1	0.455936	1739	3.22736	0.006	0.0393837	1
Tumor	ISG20	0.437095	2109	3.10857	0.008	0.0470828	1
Macrophages	ISCU	0.422266	1952	3.15312	0.008	0.044393	1
B_cells	IRF9	0.507678	795	3.66952	0.003	0.0195982	0.999
T_cells	IRF2	0.433854	1854	3.18537	0.008	0.04221	1
Tumor	IRF1	0.621184	87	4.82191	0	0.00253336	0.217
B_cells	IRAK4	0.582485	227	4.36867	0.001	0.00549839	0.647
Macrophages	IRAK1	-0.503757	548	3.88029	0.002	0.0135216	0.986
Dendritic_cells	IQSEC1	0.534886	376	4.09258	0.001	0.0091779	0.913
Dendritic_cells	INTS9	0.60557	90	4.81196	0	0.00253336	0.224
Macrophages	INSIG2	-0.470546	948	3.5754	0.003	0.0228575	1
Dendritic_cells	INPP5D	0.467947	1134	3.47882	0.004	0.0265615	1
T_cells	INPP4B	0.5103	573	3.86066	0.002	0.0138884	0.987
Macrophages	ING4	0.412661	2252	3.0717	0.008	0.0494058	1
Endothelial_cells	INF2	-0.429592	2084	3.11578	0.008	0.0466302	1
B_cells	IMMT	0.594573	180	4.48994	0	0.00437536	0.514
Monocytes	ILK	0.459928	1271	3.40877	0.004	0.0298818	1
Monocytes	ILF3-DT	0.490372	784	3.6784	0.003	0.0193243	0.999
Endothelial_cells	ILF3	-0.504388	680	3.76537	0.003	0.0164355	0.995
B_cells	ILF2	0.442738	2072	3.11892	0.008	0.0464111	1
B_cells	IL21R	0.530435	560	3.87381	0.002	0.0135672	0.986
Macrophages	IL1RN	-0.456501	1192	3.45018	0.004	0.0277959	1
Monocytes	IL18BP	0.457527	1313	3.38792	0.005	0.0309653	1
Macrophages	IL18	0.411252	2316	3.05982	0.008	0.0498101	1
Endothelial_cells	IL17RC	0.48551	914	3.59578	0.003	0.0220841	1
T_cells	IL16	0.526723	427	4.01466	0.002	0.0107025	0.952
Macrophages	IL15RA	0.497695	609	3.82366	0.002	0.0148965	0.992
B_cells	IL12RB1	0.565957	298	4.20696	0.001	0.00766805	0.819
Macrophages	IKZF1	0.422778	1936	3.15749	0.008	0.0441328	1
Macrophages	IGSF6	0.473406	903	3.60115	0.003	0.0219654	1
B_cells	IGLV3-25	0.504163	849	3.63854	0.003	0.020526	1
B_cells	IGLV3-10	0.504286	845	3.63962	0.003	0.0205143	1
Dendritic_cells	IGLC3	0.502713	651	3.7907	0.002	0.0156649	0.994
Dendritic_cells	IGLC2	0.430204	1949	3.15461	0.008	0.0442368	1
Dendritic_cells	IGHM	0.50012	677	3.76695	0.003	0.0164255	0.995
B_cells	IFRD2	0.598767	167	4.53265	0	0.00396285	0.465
Endothelial_cells	IFITM1	0.426837	2159	3.09289	0.008	0.0482761	1
Mast_cells	IFIT3	0.591903	384	4.08354	0.002	0.00927874	0.918
Endothelial_cells	IFIT2	0.562755	251	4.31937	0.001	0.00599405	0.707
Macrophages	IFIH1	0.549133	249	4.31998	0.001	0.00599405	0.707
Endothelial_cells	IFI35	0.529643	436	3.99919	0.002	0.0111014	0.959
Monocytes	IFI16	0.422233	2181	3.08783	0.008	0.0485327	1
Macrophages	IER5L	-0.46521	1025	3.52758	0.004	0.024839	1
Dendritic_cells	IER5	-0.518175	485	3.93406	0.002	0.0125445	0.977
Monocytes	IER3	-0.482833	889	3.61068	0.003	0.0215915	1
Macrophages	IDO1	0.616238	54	5.03242	0	0.00168658	0.107
Macrophages	IDH3A	0.445274	1395	3.35153	0.005	0.0328729	1
Monocytes	IDH2	0.428187	2011	3.13766	0.008	0.0451549	1
T_cells	ID3	-0.507515	595	3.8349	0.002	0.0146502	0.99
Macrophages	ID1	-0.432084	1710	3.23719	0.006	0.0388323	1
Tumor	ICAM1	0.487165	1019	3.53112	0.004	0.0247153	1
Macrophages	HVCN1	0.640869	31	5.31753	0	0.000713888	0.03
Macrophages	HTRA1	-0.668403	21	5.65495	0	0.000164823	0.005
B_cells	HTATSF1	0.514524	721	3.73028	0.003	0.0175771	0.995
B_cells	HTATIP2	0.518717	674	3.76779	0.003	0.0164255	0.995
T_cells	HSPH1	-0.452005	1418	3.34019	0.005	0.0335485	1
Endothelial_cells	HSPG2	-0.542449	355	4.12107	0.001	0.00871541	0.886
T_cells	HSPE1	-0.560432	243	4.3428	0.001	0.00568617	0.679
Macrophages	HSPD1	-0.45283	1247	3.41778	0.004	0.0295601	1
B_cells	HSPB11	0.571631	269	4.26196	0.001	0.00692255	0.772
Macrophages	HSPB1	-0.59387	95	4.78537	0	0.00263057	0.24
Endothelial_cells	HSPA8	0.442347	1750	3.22259	0.006	0.0397584	1
Macrophages	HSPA6	-0.433279	1684	3.24749	0.006	0.0381385	1
Macrophages	HSPA1B	-0.446598	1365	3.3631	0.005	0.0323646	1
Endothelial_cells	HSD17B12	0.435612	1908	3.16601	0.008	0.0435965	1
Fibroblasts	HSD11B1	0.435592	2153	3.09625	0.008	0.0479296	1
Macrophages	HPS1	0.430206	1754	3.22104	0.006	0.0398568	1
Dendritic_cells	HOTAIRM1	-0.431549	1910	3.16593	0.008	0.0435965	1
B_cells	HOOK2	0.525193	601	3.82616	0.002	0.0148965	0.99
Macrophages	HOMER3	-0.480577	802	3.66614	0.003	0.0196852	0.999
Endothelial_cells	HNRNPH1	-0.451735	1524	3.30216	0.005	0.0353476	1
Macrophages	HMGN3	0.446769	1359	3.36459	0.005	0.032312	1
Monocytes	HMGN2	0.422137	2184	3.08703	0.008	0.0485528	1
B_cells	HMG20B	0.475732	1306	3.39317	0.005	0.0306283	1
B_cells	HMG20A	0.449152	1898	3.17142	0.008	0.0430908	1
Macrophages	HLA-F	0.60514	71	4.90852	0	0.00205924	0.156
Endothelial_cells	HLA-E	0.60949	91	4.80263	0	0.00253336	0.229
Endothelial_cells	HLA-DRB5	0.532296	420	4.02425	0.002	0.0105206	0.947
Tumor	HLA-DRB1	0.556487	324	4.16389	0.001	0.00818215	0.849
Endothelial_cells	HLA-DRA	0.531071	430	4.01267	0.002	0.0107299	0.953
Endothelial_cells	HLA-DQA1	0.468163	1209	3.44349	0.004	0.028028	1
Endothelial_cells	HLA-DPB1	0.610867	89	4.81752	0	0.00253336	0.221
Endothelial_cells	HLA-DPA1	0.61449	84	4.85685	0	0.00226631	0.188
Macrophages	HLA-DOA	0.505763	529	3.89914	0.002	0.0130928	0.982
Macrophages	HLA-DMB	0.636985	39	5.27158	0	0.000848012	0.043
Endothelial_cells	HLA-DMA	0.580204	178	4.49513	0	0.00433916	0.51
Endothelial_cells	HLA-C	0.533878	414	4.03924	0.002	0.0100795	0.94
Endothelial_cells	HLA-B	0.626735	58	4.99193	0	0.00183806	0.12
Endothelial_cells	HLA-A	0.521735	496	3.92507	0.002	0.0126965	0.978
Macrophages	HK2	-0.564416	188	4.47503	0	0.00446283	0.53
Dendritic_cells	HIVEP3	0.503962	634	3.80216	0.002	0.0154207	0.994
Macrophages	HIST3H2A	-0.441689	1474	3.32029	0.005	0.0344357	1
B_cells	HIST1H4C	0.452976	1806	3.2029	0.006	0.040991	1
Monocytes	HIST1H1C	-0.466699	1146	3.46787	0.004	0.0272378	1
Endothelial_cells	HIP1R	-0.527194	454	3.97615	0.002	0.0115452	0.969
Macrophages	HILPDA	-0.552122	233	4.35	0.001	0.00568166	0.669
Macrophages	HIGD2A	0.416716	2117	3.10598	0.008	0.0472429	1
Fibroblasts	HIGD1A	-0.503585	791	3.67546	0.003	0.0193472	0.999
Macrophages	HIF1A-AS2	-0.551439	242	4.34312	0.001	0.00568617	0.679
Dendritic_cells	HIF1A	-0.648499	33	5.2974	0	0.000728689	0.036
Dendritic_cells	HGSNAT	-0.444322	1604	3.27428	0.005	0.036758	1
B_cells	HERC4	0.446685	1958	3.15119	0.008	0.0444989	1
B_cells	HEATR5B	0.541536	456	3.97594	0.002	0.0115452	0.969
B_cells	HDAC9	0.450632	1859	3.18359	0.008	0.0423858	1
Endothelial_cells	HDAC7	-0.516531	552	3.87675	0.002	0.0135672	0.986
B_cells	HDAC10	0.560407	331	4.15365	0.001	0.00830497	0.863
Macrophages	HCK	0.556305	221	4.39226	0.001	0.00517155	0.62
B_cells	HCG18	0.484058	1160	3.4641	0.004	0.0272378	1
Macrophages	HCFC1R1	-0.473747	898	3.60424	0.003	0.0218126	1
Neutrophils	HBEGF	-0.557387	2210	3.08163	0.008	0.0488414	1
Macrophages	HAX1	0.424656	1890	3.17351	0.008	0.0429524	1
Macrophages	HAPLN3	0.691753	15	5.95916	0	4.33e-05	0.001
Endothelial_cells	HAGLROS	-0.468061	1212	3.44261	0.004	0.0280565	1
Mast_cells	H3F3B	-0.531984	986	3.55745	0.004	0.0233639	1
Neutrophils	H3F3A	0.67094	453	3.98018	0.002	0.0114474	0.966
Dendritic_cells	H2AFJ	-0.535942	365	4.10273	0.001	0.00903663	0.905
Macrophages	GYS1	-0.415094	2162	3.09225	0.008	0.0483195	1
Fibroblasts	GUCY1A1	0.497919	870	3.6253	0.003	0.0209748	1
Mast_cells	GTF3C6	0.470344	2295	3.06307	0.008	0.049629	1
B_cells	GTF3C2	0.498736	918	3.591	0.003	0.0223694	1
Macrophages	GTF3C1	-0.43012	1757	3.22031	0.006	0.0398568	1
Tumor	GTF2I	0.4534	1690	3.24347	0.006	0.0384913	1
B_cells	GTF2F1	0.566451	294	4.21172	0.001	0.00766805	0.815
Tumor	GSTP1	-0.509135	727	3.72498	0.003	0.0177615	0.997
Macrophages	GSTK1	0.582942	117	4.66835	0	0.00327941	0.328
Macrophages	GSDME	-0.577478	135	4.61069	0	0.00352377	0.385
Monocytes	GSDMD	0.529508	408	4.04114	0.002	0.0100795	0.94
B_cells	GRWD1	0.440271	2142	3.09883	0.008	0.047774	1
Macrophages	GRN	0.506531	516	3.90637	0.002	0.0130043	0.981
B_cells	GRIPAP1	0.461363	1610	3.27243	0.005	0.0368494	1
Dendritic_cells	GRINA	-0.431549	1909	3.16593	0.008	0.0435965	1
Endothelial_cells	GRB10	-0.464082	1274	3.40813	0.004	0.0298897	1
T_cells	GRAP2	0.447011	1531	3.29728	0.005	0.0357519	1
Endothelial_cells	GRAMD1A	-0.449082	1583	3.27959	0.005	0.0366466	1
Macrophages	GPX7	-0.427303	1820	3.19615	0.006	0.0415258	1
Monocytes	GPSM3	0.452581	1405	3.34516	0.005	0.033334	1
Monocytes	GPR155	0.456567	1331	3.3796	0.005	0.0314305	1
Fibroblasts	GPN3	0.440564	2015	3.13707	0.008	0.0451549	1
Macrophages	GPI	-0.477674	844	3.63977	0.003	0.0205143	1
Endothelial_cells	GPER1	0.519592	520	3.90513	0.002	0.0130043	0.981
Macrophages	GPBAR1	0.548707	254	4.3157	0.001	0.00601498	0.711
B_cells	GPATCH4	0.534135	512	3.90766	0.002	0.0130043	0.981
B_cells	GPATCH11	0.530558	556	3.87493	0.002	0.0135672	0.986
Macrophages	GPAT4	-0.417528	2096	3.11286	0.008	0.0467645	1
Tumor	GOT2	-0.431776	2282	3.06508	0.008	0.049629	1
B_cells	GOLGA4	0.489485	1061	3.51074	0.004	0.0253794	1
Endothelial_cells	GNPNAT1	-0.422602	2320	3.05785	0.008	0.0499924	1
Monocytes	GNPAT	0.466987	1142	3.4704	0.004	0.0271222	1
B_cells	GNL3	0.5498	402	4.05311	0.002	0.00986549	0.937
Dendritic_cells	GNG2	-0.437023	1780	3.21218	0.006	0.0403643	1
Fibroblasts	GMEB1	0.456233	1625	3.26716	0.005	0.0371172	1
Endothelial_cells	GJA1	-0.492959	809	3.6622	0.003	0.0197899	0.999
Monocytes	GIMAP8	0.524034	443	3.9892	0.002	0.0113421	0.964
Monocytes	GIMAP7	0.612293	78	4.88521	0	0.00205924	0.166
Macrophages	GIMAP6	0.483309	772	3.69105	0.003	0.0187617	0.998
Macrophages	GIMAP5	0.599035	85	4.84149	0	0.00239439	0.202
T_cells	GIMAP4	0.512029	554	3.87671	0.002	0.0135672	0.986
T_cells	GIMAP2	0.522641	455	3.97605	0.002	0.0115452	0.969
B_cells	GIGYF2	0.465433	1512	3.30642	0.005	0.0351896	1
Monocytes	GHITM	0.419448	2286	3.06463	0.008	0.049629	1
Fibroblasts	GEM	0.433337	2224	3.07782	0.008	0.0491174	1
Monocytes	GDI2	0.428764	1990	3.1425	0.008	0.0449441	1
Tumor	GCSH	-0.498786	860	3.63296	0.003	0.0206751	1
Macrophages	GCNT1	0.431657	1718	3.23352	0.006	0.0390914	1
Macrophages	GBP5	0.721036	8	6.3686	0	0	0
Monocytes	GBP4	0.660696	25	5.44372	0	0.000443043	0.015
Macrophages	GBP2	0.489627	700	3.74899	0.003	0.0169682	0.995
Macrophages	GBP1	0.727055	5	6.45717	0	0	0
B_cells	GBF1	0.512118	744	3.70887	0.003	0.0182891	0.998
B_cells	GARS	0.467407	1467	3.32296	0.005	0.0343095	1
B_cells	GAPT	0.480111	1234	3.43038	0.004	0.0286579	1
Macrophages	GAPLINC	-0.463758	1053	3.51462	0.004	0.025315	1
Macrophages	GAPDH	-0.561513	200	4.44528	0.001	0.00466361	0.565
Endothelial_cells	GAN	-0.459745	1348	3.37074	0.005	0.0319742	1
Endothelial_cells	GADD45G	-0.428061	2130	3.10306	0.008	0.0474071	1
Endothelial_cells	GABPB1-AS1	-0.435204	1919	3.16259	0.008	0.0438422	1
Monocytes	GABARAPL1	-0.435006	1825	3.19511	0.006	0.0415258	1
B_cells	G6PD	0.44391	2038	3.12849	0.008	0.0458607	1
Macrophages	G0S2	-0.611372	59	4.97777	0	0.00197117	0.127
Macrophages	FZR1	-0.502177	566	3.86549	0.002	0.0138353	0.986
Macrophages	FYB1	0.558012	214	4.4096	0.001	0.00497136	0.601
Fibroblasts	FUCA2	0.508673	731	3.72084	0.003	0.0179484	0.997
Fibroblasts	FUBP1	-0.514281	668	3.77122	0.002	0.0163834	0.995
Dendritic_cells	FTSJ3	0.481489	909	3.59867	0.003	0.0219654	1
Macrophages	FSCN1	-0.43106	1733	3.22838	0.006	0.039382	1
Fibroblasts	FRZB	0.459875	1529	3.29774	0.005	0.0357509	1
B_cells	FRG1	0.521184	653	3.78996	0.002	0.015678	0.994
B_cells	FOXN3	0.437434	2234	3.07579	0.008	0.0491916	1
T_cells	FOSL2	-0.502713	652	3.7907	0.002	0.0156649	0.994
Endothelial_cells	FOSL1	-0.57102	216	4.40197	0.001	0.00511499	0.61
Monocytes	FOPNL	0.559136	246	4.32986	0.001	0.00587009	0.693
Macrophages	FNIP1	-0.438359	1548	3.29138	0.005	0.0360674	1
Fibroblasts	FMO2	0.441374	1982	3.14373	0.008	0.0449338	1
Fibroblasts	FMO1	0.442877	1943	3.15613	0.008	0.0441792	1
Endothelial_cells	FMNL3	-0.42602	2190	3.08613	0.008	0.0486051	1
Endothelial_cells	FLT4	0.435918	1904	3.16857	0.008	0.0433397	1
B_cells	FLT3LG	0.447179	1948	3.15523	0.008	0.0441792	1
Macrophages	FLT1	-0.505379	533	3.89553	0.002	0.0131736	0.983
Macrophages	FLOT1	-0.45172	1275	3.40802	0.004	0.0298897	1
Macrophages	FLNB	-0.662256	22	5.57774	0	0.000180588	0.006
B_cells	FLII	0.47197	1370	3.36136	0.005	0.0324102	1
Monocytes	FLI1	0.477935	964	3.56703	0.003	0.0231396	1
Macrophages	FKBP4	-0.45044	1300	3.39676	0.005	0.0304129	1
B_cells	FIP1L1	0.435708	2306	3.0618	0.008	0.049707	1
Dendritic_cells	FILIP1L	-0.464586	1194	3.44938	0.004	0.0278118	1
Endothelial_cells	FHOD1	-0.482296	963	3.56731	0.003	0.0231396	1
Macrophages	FGL2	0.641168	30	5.32108	0	0.000713888	0.03
B_cells	FGD3	0.566081	297	4.20815	0.001	0.00766805	0.819
Macrophages	FGD2	0.569026	170	4.52257	0	0.0040558	0.478
B_cells	FCHSD2	0.503299	863	3.63095	0.003	0.0207318	1
Endothelial_cells	FCGRT	0.43898	1832	3.19425	0.006	0.0415689	1
Neutrophils	FCGR3B	0.565324	2009	3.1384	0.008	0.0451151	1
Monocytes	FCGR3A	0.458055	1307	3.3925	0.005	0.0306774	1
Dendritic_cells	FCGR2A	-0.441345	1680	3.24889	0.006	0.0380757	1
B_cells	FBXW5	0.503978	853	3.63691	0.003	0.0205426	1
B_cells	FBXO7	0.4502	1871	3.18004	0.008	0.042575	1
Macrophages	FBXO6	0.556903	217	4.39832	0.001	0.00517155	0.615
B_cells	FBXO44	0.444465	2029	3.13302	0.008	0.0454322	1
B_cells	FBXO3	0.518964	672	3.77001	0.002	0.0163834	0.995
B_cells	FBXO21	0.463953	1542	3.29404	0.005	0.0358627	1
Macrophages	FAS	0.482882	774	3.68715	0.003	0.0189869	0.999
B_cells	FARS2	0.457539	1698	3.24065	0.006	0.0386627	1
Endothelial_cells	FAP	-0.5425	353	4.12156	0.001	0.00871541	0.886
B_cells	FAM76B	0.478631	1248	3.41778	0.004	0.0295601	1
B_cells	FAM32A	0.476041	1302	3.39578	0.005	0.0304906	1
Macrophages	FAM210A	-0.471869	925	3.5873	0.003	0.0225129	1
T_cells	FAM208A	0.420936	2228	3.07702	0.008	0.0491293	1
Macrophages	FAM162A	-0.489712	698	3.74977	0.003	0.0169479	0.995
B_cells	FAM13B	0.489115	1068	3.50755	0.004	0.0255233	1
Tumor	FAM136A	0.493871	922	3.5897	0.003	0.0223939	1
Macrophages	FAM129B	-0.603816	74	4.89392	0	0.00205924	0.163
Monocytes	FAM111A	0.472269	1048	3.51686	0.004	0.0252475	1
Macrophages	FAH	-0.441091	1494	3.31509	0.005	0.0346164	1
B_cells	FAF2	0.450385	1864	3.18156	0.008	0.0424913	1
Endothelial_cells	F8	0.47449	1082	3.49866	0.004	0.0259842	1
B_cells	EXOSC3	0.445267	2002	3.13958	0.008	0.0450849	1
B_cells	EXOSC10	0.514647	719	3.73138	0.003	0.0175323	0.995
Dendritic_cells	EXOG	0.492965	758	3.70185	0.003	0.0184264	0.998
Monocytes	EXOC7	0.475582	996	3.54615	0.004	0.0240005	1
Endothelial_cells	EXOC6	0.426633	2166	3.0912	0.008	0.0483624	1
Monocytes	EVL	0.616711	67	4.93387	0	0.00204577	0.148
Endothelial_cells	EVA1B	-0.574694	203	4.43906	0.001	0.00466361	0.568
Macrophages	ETV7	0.530351	345	4.13443	0.001	0.00853314	0.873
Macrophages	ETS2	-0.45727	1178	3.45698	0.004	0.0275251	1
Endothelial_cells	ETS1	-0.429898	2077	3.11832	0.008	0.0464287	1
B_cells	ESYT1	0.46494	1522	3.30229	0.005	0.0353476	1
Monocytes	ERP29	0.516158	506	3.91519	0.002	0.0129107	0.98
B_cells	ERO1B	0.448289	1913	3.16433	0.008	0.0437129	1
Macrophages	ERO1A	-0.629215	43	5.18081	0	0.00109473	0.06
B_cells	ERICH1	0.477151	1283	3.4052	0.005	0.0299855	1
Macrophages	ERGIC1	-0.437036	1580	3.27993	0.005	0.0366466	1
B_cells	ERCC5	0.553253	381	4.08566	0.001	0.00926027	0.916
Macrophages	ERAP2	0.478016	838	3.64287	0.003	0.0204727	1
Dendritic_cells	ERAP1	0.46084	1252	3.41671	0.004	0.0295839	1
B_cells	ERAL1	0.464878	1526	3.30178	0.005	0.0353476	1
Endothelial_cells	EPSTI1	0.587959	152	4.57496	0	0.00369354	0.432
B_cells	EPS15L1	0.491397	1027	3.52725	0.004	0.024839	1
B_cells	EPN1	0.477582	1270	3.40887	0.004	0.0298818	1
Macrophages	EPHX1	0.460599	1111	3.4865	0.004	0.0263181	1
Endothelial_cells	EPHA2	-0.43852	1842	3.19039	0.006	0.0418307	1
Endothelial_cells	EPAS1	0.428469	2115	3.10645	0.008	0.0472429	1
B_cells	EP400	0.497132	944	3.57702	0.003	0.0228188	1
Endothelial_cells	ENTR1	-0.430153	2065	3.12044	0.008	0.0463623	1
B_cells	ENTPD4	0.456553	1722	3.23247	0.006	0.0391389	1
Macrophages	ENPP2	0.450525	1299	3.39751	0.005	0.0303766	1
Tumor	ENO3	-0.459817	1532	3.29725	0.005	0.0357519	1
Macrophages	ENO2	-0.52002	415	4.03457	0.002	0.0101974	0.941
Macrophages	ENO1	-0.527448	362	4.10622	0.001	0.00903663	0.902
Macrophages	EMP3	-0.411594	2304	3.0627	0.008	0.049629	1
Macrophages	EMP1	-0.55511	226	4.38016	0.001	0.00531137	0.637
Macrophages	EML3	-0.491591	676	3.76709	0.003	0.0164255	0.995
B_cells	EMD	0.440148	2146	3.09783	0.008	0.0478185	1
Fibroblasts	EMC9	-0.471034	1308	3.39223	0.005	0.0306831	1
B_cells	EMC8	0.453222	1798	3.20494	0.006	0.0408719	1
B_cells	EMC2	0.474684	1323	3.38429	0.005	0.031119	1
B_cells	EMC10	0.475486	1310	3.39108	0.005	0.0307456	1
B_cells	ELP2	0.446562	1963	3.15018	0.008	0.0445508	1
B_cells	ELOVL1	0.455072	1759	3.22022	0.006	0.0398568	1
Monocytes	ELOC	-0.466315	1159	3.46451	0.004	0.0272378	1
Mast_cells	ELMOD3	0.536943	906	3.5991	0.003	0.0219654	1
B_cells	ELK4	0.459266	1662	3.25499	0.005	0.0377362	1
Monocytes	ELF4	0.486291	840	3.64166	0.003	0.020513	1
B_cells	ELF2	0.450509	1862	3.18258	0.008	0.042464	1
B_cells	EIF4H	0.521801	642	3.79552	0.002	0.0156016	0.994
B_cells	EIF4G1	0.55128	394	4.06704	0.002	0.00958966	0.928
Macrophages	EIF4EBP1	-0.534876	313	4.17865	0.001	0.00802356	0.838
B_cells	EIF4E	0.443602	2047	3.12597	0.008	0.0459901	1
Dendritic_cells	EIF3M	0.45431	1372	3.36008	0.005	0.0325188	1
Monocytes	EIF3H	0.57964	166	4.5379	0	0.00392	0.462
T_cells	EIF3F	0.449988	1468	3.32283	0.005	0.0343095	1
B_cells	EIF3D	0.463336	1555	3.28889	0.005	0.0362207	1
Tumor	EIF3C	-0.470051	1325	3.38386	0.005	0.0311394	1
B_cells	EIF2S1	0.577428	252	4.3187	0.001	0.00599405	0.709
Monocytes	EID1	0.473133	1034	3.52449	0.004	0.0249452	1
Endothelial_cells	EHD4	-0.46051	1339	3.37732	0.005	0.0315053	1
Tumor	EGFL7	-0.431661	2289	3.06413	0.008	0.049629	1
Neutrophils	EFHD2	0.605006	1224	3.43422	0.004	0.0285651	1
B_cells	EFCAB14	0.452729	1811	3.20087	0.006	0.0411397	1
Dendritic_cells	EEFSEC	0.433373	1868	3.18132	0.008	0.0424958	1
Dendritic_cells	EEF2	0.557743	253	4.31599	0.001	0.00601498	0.711
Dendritic_cells	EEF1A1	0.501273	663	3.77749	0.002	0.0161651	0.995
Fibroblasts	EDRF1	0.439466	2039	3.12803	0.008	0.0458627	1
Endothelial_cells	EDEM1	-0.433469	1968	3.14809	0.008	0.0447218	1
Monocytes	ECSIT	0.419544	2279	3.06543	0.008	0.049629	1
Macrophages	ECM1	-0.428029	1808	3.20236	0.006	0.0410268	1
B_cells	EBP	0.448412	1911	3.16535	0.008	0.0436283	1
Dendritic_cells	DYSF	0.449508	1480	3.31871	0.005	0.0344981	1
Endothelial_cells	DYRK2	-0.453316	1489	3.31565	0.005	0.0346164	1
Neutrophils	DYNLT1	0.662393	522	3.90481	0.002	0.0130043	0.981
B_cells	DYNC1LI1	0.455936	1738	3.22736	0.006	0.0393837	1
B_cells	DYNC1I2	0.456183	1727	3.22941	0.006	0.0393561	1
Endothelial_cells	DVL2	-0.437755	1858	3.18397	0.008	0.042327	1
B_cells	DUS3L	0.471292	1380	3.35564	0.005	0.0327801	1
Monocytes	DTX3L	0.48605	847	3.6395	0.003	0.0205143	1
Endothelial_cells	DTX2	-0.513776	582	3.85132	0.002	0.0141448	0.987
Monocytes	DTNBP1	0.429148	1976	3.14573	0.008	0.0448173	1
Dendritic_cells	DSC2	-0.479568	937	3.58155	0.003	0.0226402	1
B_cells	DRG2	0.524514	614	3.82002	0.002	0.0149603	0.994
Fibroblasts	DR1	-0.519773	612	3.82095	0.002	0.0149603	0.994
Macrophages	DPP9	0.477717	842	3.64015	0.003	0.0205143	1
B_cells	DPP7	0.475547	1309	3.3916	0.005	0.0307337	1
B_cells	DPAGT1	0.510823	767	3.69737	0.003	0.0184923	0.998
Macrophages	DOT1L	-0.43409	1664	3.25448	0.005	0.0377562	1
B_cells	DOPEY2	0.512118	746	3.70887	0.003	0.0182891	0.998
B_cells	DOK3	0.607524	130	4.62291	0	0.00352377	0.377
Monocytes	DOK2	0.505402	623	3.81541	0.002	0.0150011	0.994
Macrophages	DNPEP	0.710279	10	6.21423	0	0	0
Macrophages	DNASE2	0.411722	2291	3.06378	0.008	0.049629	1
Dendritic_cells	DNASE1L3	0.610996	81	4.87101	0	0.00216223	0.175
B_cells	DNAJC8	0.441135	2119	3.10586	0.008	0.0472429	1
Macrophages	DNAJB4	-0.447537	1347	3.37131	0.005	0.0319157	1
Macrophages	DNAJB12	0.496798	624	3.81533	0.002	0.0150011	0.994
Mast_cells	DNAJB1	-0.487045	1833	3.19307	0.006	0.0416791	1
B_cells	DNAJA3	0.438915	2182	3.0878	0.008	0.0485327	1
Endothelial_cells	DNAJA1	0.480918	987	3.55515	0.004	0.023524	1
B_cells	DLST	0.46272	1568	3.28375	0.005	0.0364945	1
B_cells	DIMT1	0.591119	195	4.45502	0.001	0.00462552	0.554
Dendritic_cells	DIDO1	0.487347	826	3.65115	0.003	0.0201254	0.999
B_cells	DIAPH1	0.494974	985	3.55824	0.004	0.0233378	1
Macrophages	DHX32	-0.418253	2069	3.11901	0.008	0.0464111	1
B_cells	DHX15	0.468023	1457	3.32814	0.005	0.0339632	1
B_cells	DHTKD1	0.443848	2041	3.12798	0.008	0.0458627	1
Dendritic_cells	DGKZ	0.424394	2118	3.10588	0.008	0.0472429	1
Macrophages	DGKA	-0.457526	1169	3.45924	0.004	0.0274606	1
B_cells	DENR	0.490102	1050	3.51606	0.004	0.0252475	1
Fibroblasts	DENND4C	0.450393	1763	3.21841	0.006	0.0399791	1
B_cells	DENND4B	0.489732	1056	3.51287	0.004	0.0253794	1
Macrophages	DENND3	-0.439853	1517	3.30434	0.005	0.0352972	1
T_cells	DENND2D	0.489268	798	3.66844	0.003	0.019626	0.999
Macrophages	DENND1C	0.435328	1630	3.26517	0.005	0.0372327	1
Monocytes	DENND1A	0.419064	2308	3.06143	0.008	0.0497138	1
B_cells	DELE1	0.500709	893	3.60825	0.003	0.0216576	1
Macrophages	DEF8	-0.524332	388	4.07607	0.002	0.00942929	0.923
Macrophages	DECR1	0.496969	619	3.81691	0.002	0.0149937	0.994
B_cells	DDX60L	0.439901	2154	3.09582	0.008	0.0479509	1
Endothelial_cells	DDX60	0.510153	618	3.81802	0.002	0.0149854	0.994
B_cells	DDX59	0.654702	47	5.13765	0	0.00117831	0.068
Dendritic_cells	DDX54	0.543577	317	4.1766	0.001	0.00802972	0.839
Dendritic_cells	DDX52	0.45892	1292	3.40001	0.005	0.0302788	1
B_cells	DDX50	0.483811	1165	3.46199	0.004	0.0273346	1
Macrophages	DDX41	-0.43123	1726	3.22985	0.006	0.0393561	1
B_cells	DDX27	0.490842	1038	3.52245	0.004	0.0250032	1
B_cells	DDX17	0.444835	2018	3.13605	0.008	0.0452576	1
Endothelial_cells	DDOST	0.42949	2085	3.11493	0.008	0.0467114	1
Macrophages	DDIT4	-0.463673	1054	3.51386	0.004	0.0253481	1
Macrophages	DDIT3	-0.465167	1028	3.52719	0.004	0.024839	1
B_cells	DDAH2	0.466728	1482	3.31727	0.005	0.0346137	1
T_cells	DCXR	-0.484946	868	3.6296	0.003	0.0207318	1
Endothelial_cells	DCUN1D3	-0.430408	2058	3.12257	0.008	0.0462442	1
Macrophages	DCTN6	-0.446043	1376	3.35825	0.005	0.032616	1
B_cells	DCTN2	0.459574	1655	3.25755	0.005	0.0375829	1
B_cells	DCTN1	0.48338	1174	3.45829	0.004	0.0274606	1
B_cells	DCPS	0.505643	824	3.65157	0.003	0.0201254	0.999
B_cells	DCP1A	0.436324	2272	3.06679	0.008	0.049629	1
Dendritic_cells	DCLRE1C	0.561008	235	4.34857	0.001	0.00568166	0.67
Fibroblasts	DCAF8	0.473404	1261	3.41247	0.004	0.0297944	1
Macrophages	DCAF7	0.452403	1258	3.41403	0.004	0.0297246	1
Endothelial_cells	DCAF15	-0.507551	645	3.79421	0.002	0.0156332	0.994
B_cells	DCAF13	0.482516	1189	3.45091	0.004	0.0277959	1
B_cells	DCAF11	0.436694	2259	3.06979	0.008	0.0495288	1
B_cells	DBNL	0.435461	2317	3.05981	0.008	0.0498101	1
Monocytes	DAPP1	0.42958	1964	3.14936	0.008	0.0446341	1
T_cells	DAP3	0.446435	1546	3.29235	0.005	0.0359986	1
Macrophages	CYTOR	-0.431145	1729	3.22911	0.006	0.0393561	1
B_cells	CYREN	0.537095	484	3.93488	0.002	0.0125445	0.977
Fibroblasts	CYP7B1	0.662581	37	5.28936	0	0.000728689	0.037
Fibroblasts	CYP27A1	0.459644	1537	3.29579	0.005	0.0357865	1
Macrophages	CYBB	0.561342	201	4.44353	0.001	0.00466361	0.566
Fibroblasts	CYB5A	0.464038	1442	3.33284	0.005	0.0337811	1
B_cells	CXXC5	0.475794	1305	3.39369	0.005	0.0306226	1
Endothelial_cells	CXCR4	-0.435051	1925	3.16131	0.008	0.043859	1
Macrophages	CXCL9	0.727055	6	6.45717	0	0	0
Macrophages	CXCL8	-0.536754	304	4.19709	0.001	0.00773963	0.826
Monocytes	CXCL5	-0.475534	998	3.54573	0.004	0.024009	1
Tumor	CXCL16	0.535268	464	3.96337	0.002	0.011883	0.972
Macrophages	CXCL11	0.591309	100	4.75773	0	0.00274825	0.26
Macrophages	CXCL10	0.571416	164	4.54736	0	0.00381162	0.455
B_cells	CWC27	0.568794	283	4.23439	0.001	0.00733205	0.804
B_cells	CWC22	0.527783	584	3.84966	0.002	0.014164	0.988
T_cells	CUTA	-0.585498	144	4.59869	0	0.00352377	0.398
Macrophages	CUL9	0.563647	192	4.46714	0.001	0.00452297	0.541
B_cells	CUL5	0.466543	1487	3.31572	0.005	0.0346164	1
Monocytes	CUL1	0.604322	93	4.79846	0	0.00253336	0.231
B_cells	CTSW	0.493	1005	3.54112	0.004	0.0242399	1
Macrophages	CTSS	0.67011	20	5.6766	0	0.000138451	0.004
Dendritic_cells	CTSO	0.429052	1980	3.14492	0.008	0.0448571	1
T_cells	CTSD	-0.420504	2243	3.07342	0.008	0.0493587	1
Macrophages	CTSC	0.566465	176	4.49611	0	0.00433916	0.509
B_cells	CTR9	0.476657	1288	3.40102	0.005	0.0302788	1
B_cells	CTNNA1	0.476534	1293	3.39997	0.005	0.0302788	1
B_cells	CTDSP1	0.64983	48	5.08205	0	0.00147104	0.084
Macrophages	CSTB	-0.47665	864	3.63048	0.003	0.0207318	1
B_cells	CSNK1G3	0.440641	2134	3.10184	0.008	0.0475158	1
Macrophages	CSNK1E	-0.549475	248	4.3234	0.001	0.00596232	0.702
B_cells	CSK	0.442121	2093	3.1139	0.008	0.046716	1
B_cells	CRYZ	0.496886	949	3.57487	0.003	0.0228575	1
Macrophages	CRYBG1	0.422266	1951	3.15312	0.008	0.044393	1
Fibroblasts	CRTAP	0.483464	1081	3.49901	0.004	0.0259842	1
Endothelial_cells	CRNDE	-0.438571	1841	3.19082	0.006	0.0417947	1
Monocytes	CRLF3	0.485522	856	3.63476	0.003	0.0206415	1
T_cells	CREM	-0.50108	664	3.77574	0.002	0.0162471	0.995
Endothelial_cells	CRBN	0.484184	929	3.58402	0.003	0.0226402	1
Macrophages	CRAT	0.439341	1528	3.2999	0.005	0.0355166	1
Macrophages	CPVL	0.478443	833	3.64674	0.003	0.0203128	1
Fibroblasts	CPQ	0.433858	2208	3.08207	0.008	0.0488337	1
Endothelial_cells	CPNE3	0.505408	666	3.77466	0.002	0.0162607	0.995
Monocytes	COX7C	0.437215	1775	3.21381	0.006	0.0402666	1
Mast_cells	COX6A1	-0.497976	1581	3.27966	0.005	0.0366466	1
Tumor	COX4I1	-0.449815	1776	3.2136	0.006	0.0403015	1
Fibroblasts	CORO1B	0.492657	943	3.57906	0.003	0.0227123	1
Monocytes	COPS5	0.515294	515	3.90711	0.002	0.0130043	0.981
Endothelial_cells	COPS4	0.450816	1540	3.29434	0.005	0.0358627	1
B_cells	COMMD8	0.492014	1013	3.53258	0.004	0.0246995	1
B_cells	COMMD10	0.47234	1360	3.36448	0.005	0.032312	1
B_cells	COMMD1	0.448227	1916	3.16383	0.008	0.0437157	1
Endothelial_cells	COLGALT1	-0.53398	412	4.0402	0.002	0.0100795	0.94
Endothelial_cells	COL4A2	-0.493061	806	3.66311	0.003	0.0197899	0.999
Endothelial_cells	COL4A1	-0.482143	967	3.56596	0.003	0.0231396	1
Endothelial_cells	COL27A1	-0.472857	1118	3.48438	0.004	0.0263886	1
Endothelial_cells	COL18A1	-0.554388	282	4.23688	0.001	0.00730304	0.802
B_cells	COA6	0.50848	789	3.67661	0.003	0.0193243	0.999
T_cells	CNTRL	0.524082	442	3.98965	0.002	0.0113421	0.963
Macrophages	CNTLN	0.461538	1089	3.49485	0.004	0.0261493	1
B_cells	CNR2	0.47012	1402	3.34577	0.005	0.0333022	1
T_cells	CNN2	0.455846	1345	3.37336	0.005	0.0317639	1
Tumor	CNIH1	-0.43617	2136	3.10099	0.008	0.0475805	1
Dendritic_cells	CMTM6	-0.520288	470	3.95389	0.002	0.0121277	0.974
Monocytes	CMPK2	0.420216	2253	3.07102	0.008	0.049489	1
Dendritic_cells	CMKLR1	0.49623	718	3.73148	0.003	0.0175323	0.995
B_cells	CMC1	0.482455	1191	3.45038	0.004	0.0277959	1
Fibroblasts	CLU	0.4963	888	3.61104	0.003	0.0215854	1
B_cells	CLTA	0.477397	1276	3.4073	0.004	0.0299275	1
Fibroblasts	CLSTN3	0.465194	1414	3.34263	0.005	0.0334094	1
B_cells	CLSTN1	0.478261	1254	3.41463	0.004	0.0297195	1
Monocytes	CLNS1A	0.443361	1629	3.26608	0.005	0.0371514	1
Macrophages	CLIC2	0.474729	885	3.6131	0.003	0.0215021	1
Dendritic_cells	CLEC9A	0.424586	2112	3.10748	0.008	0.0471838	1
Macrophages	CLEC5A	-0.614488	56	5.0127	0	0.00170591	0.111
Macrophages	CLEC10A	0.549133	250	4.31998	0.001	0.00599405	0.707
Dendritic_cells	CLDN1	-0.419544	2281	3.06543	0.008	0.049629	1
Endothelial_cells	CLCN7	-0.424592	2236	3.0743	0.008	0.0493045	1
Macrophages	CKLF	-0.445146	1398	3.35042	0.005	0.0329395	1
B_cells	CKAP2	0.442368	2083	3.11591	0.008	0.0466302	1
Macrophages	CIITA	0.465124	1029	3.52681	0.004	0.0248499	1
Macrophages	CHTF8	0.456886	1185	3.45358	0.004	0.0276803	1
Macrophages	CHSY1	-0.504824	541	3.89031	0.002	0.0132143	0.985
Macrophages	CHST15	-0.468881	978	3.56044	0.003	0.0232596	1
B_cells	CHRAC1	0.484305	1151	3.46621	0.004	0.0272378	1
T_cells	CHMP7	0.421032	2223	3.07782	0.008	0.0491174	1
B_cells	CHMP5	0.449769	1882	3.17649	0.008	0.0427937	1
Fibroblasts	CGRRF1	0.531915	489	3.93227	0.002	0.0125635	0.977
Macrophages	CFD	0.44822	1340	3.37729	0.005	0.0315053	1
Dendritic_cells	CERS4	-0.438752	1741	3.22684	0.006	0.039414	1
Macrophages	CEP68	-0.461795	1085	3.49713	0.004	0.0260243	1
B_cells	CEP57	0.446809	1955	3.1522	0.008	0.0444385	1
Macrophages	CEP170	-0.490523	693	3.75724	0.003	0.0166361	0.995
Tumor	CENPX	-0.434783	2174	3.08963	0.008	0.0484365	1
Endothelial_cells	CENPF	-0.473163	1108	3.48706	0.004	0.0263181	1
Monocytes	CEBPZOS	0.448259	1510	3.30799	0.005	0.0350443	1
B_cells	CEBPZ	0.469812	1413	3.34317	0.005	0.0333571	1
B_cells	CDKN2D	0.437311	2235	3.07479	0.008	0.0493045	1
B_cells	CDKN1B	0.528091	581	3.85246	0.002	0.0141048	0.987
T_cells	CDKN1A	-0.510684	568	3.86422	0.002	0.0138353	0.986
B_cells	CDK11A	0.510885	766	3.69791	0.003	0.0184923	0.998
Monocytes	CDIPT	0.512029	553	3.87671	0.002	0.0135672	0.986
B_cells	CDC73	0.472834	1352	3.36865	0.005	0.0320733	1
Dendritic_cells	CDC42SE1	-0.428379	2004	3.13927	0.008	0.0450849	1
T_cells	CDC25B	0.50545	622	3.81586	0.002	0.0149937	0.994
Fibroblasts	CDC14B	0.44756	1827	3.19487	0.006	0.0415258	1
Macrophages	CD99	-0.485614	739	3.71214	0.003	0.018258	0.997
Macrophages	CD93	-0.458038	1163	3.46378	0.004	0.0272378	1
T_cells	CD9	-0.532485	392	4.06957	0.002	0.00955735	0.927
Dendritic_cells	CD86	-0.424154	2123	3.10387	0.008	0.0473981	1
T_cells	CD83	-0.488691	805	3.66325	0.003	0.0197899	0.999
Macrophages	CD82	-0.493511	657	3.78484	0.002	0.015886	0.995
Endothelial_cells	CD74	0.575918	197	4.45147	0.001	0.00462552	0.557
Monocytes	CD48	0.584826	147	4.59168	0	0.00359313	0.409
Fibroblasts	CD47	0.434783	2175	3.08963	0.008	0.0484365	1
Neutrophils	CD44	-0.627595	886	3.61269	0.003	0.0215162	1
T_cells	CD3G	0.422137	2186	3.08703	0.008	0.0485528	1
Macrophages	CD38	0.546487	261	4.29351	0.001	0.00636556	0.739
T_cells	CD37	0.419256	2296	3.06303	0.008	0.049629	1
Endothelial_cells	CD276	-0.511837	596	3.83348	0.002	0.0146791	0.99
B_cells	CD19	0.440271	2141	3.09883	0.008	0.047774	1
Macrophages	CD109	-0.610646	60	4.96966	0	0.00197293	0.13
Macrophages	CCPG1	0.469393	970	3.56504	0.003	0.0231396	1
Fibroblasts	CCNL2	-0.437558	2097	3.11236	0.008	0.0468485	1
T_cells	CCND2	-0.460072	1266	3.41002	0.004	0.0298818	1
Dendritic_cells	CCND1	0.488547	810	3.66195	0.003	0.0197899	0.999
Macrophages	CCL3	-0.428584	1788	3.20712	0.006	0.0407729	1
Endothelial_cells	CCL21	0.446837	1646	3.26054	0.005	0.037352	1
T_cells	CCL20	-0.451909	1421	3.33936	0.005	0.0335914	1
Monocytes	CCL2	-0.443553	1622	3.26772	0.005	0.0371159	1
Macrophages	CCL19	0.479553	817	3.65682	0.003	0.0199839	0.999
Dendritic_cells	CCDC50	0.421561	2206	3.08222	0.008	0.0488337	1
Macrophages	CCDC28A	0.425041	1880	3.1768	0.008	0.0427937	1
Fibroblasts	CCDC22	0.437327	2103	3.11047	0.008	0.0469414	1
Fibroblasts	CCDC14	-0.466929	1377	3.35732	0.005	0.0326771	1
B_cells	CCDC130	0.522788	633	3.80442	0.002	0.0153226	0.994
Dendritic_cells	CCDC126	0.426074	2068	3.11994	0.008	0.0464111	1
Macrophages	CBR1	0.502049	567	3.86429	0.002	0.0138353	0.986
Endothelial_cells	CBL	-0.425714	2200	3.08359	0.008	0.0487829	1
B_cells	CBFA2T3	0.491335	1030	3.52671	0.004	0.0248499	1
Endothelial_cells	CAVIN2	0.523776	475	3.94412	0.002	0.0123766	0.976
Macrophages	CAVIN1	-0.411807	2287	3.0645	0.008	0.049629	1
Macrophages	CATSPER1	-0.471869	924	3.5873	0.003	0.0225129	1
Macrophages	CAT	0.465722	1014	3.53215	0.004	0.0246995	1
B_cells	CAST	0.566327	295	4.21053	0.001	0.00766805	0.816
Macrophages	CASP8	0.428498	1795	3.20639	0.006	0.0407729	1
Macrophages	CASP5	0.480406	803	3.66459	0.003	0.0197508	0.999
Macrophages	CASP4	0.604115	73	4.89721	0	0.00205924	0.162
B_cells	CASP3	0.535122	505	3.91672	0.002	0.0128567	0.98
Endothelial_cells	CASP1	0.687143	18	5.71427	0	0.000138451	0.004
Fibroblasts	CASD1	-0.512257	694	3.75299	0.003	0.0168631	0.995
Monocytes	CARD9	0.449268	1483	3.31665	0.005	0.0346164	1
Macrophages	CARD19	-0.56019	210	4.43177	0.001	0.00469085	0.579
Tumor	CARD17	0.475775	1227	3.43276	0.004	0.0285954	1
Endothelial_cells	CARD16	0.557653	263	4.26894	0.001	0.00692255	0.767
Monocytes	CAPZB	0.430972	1928	3.16108	0.008	0.0438612	1
Tumor	CAPN12	-0.478203	1183	3.45361	0.004	0.0276803	1
Dendritic_cells	CAMK2D	0.421801	2198	3.08422	0.008	0.0487088	1
B_cells	CALM2	0.438791	2187	3.0868	0.008	0.0485645	1
Monocytes	CALHM6	0.556687	257	4.30548	0.001	0.00616321	0.724
Monocytes	CALCOCO2	0.464298	1201	3.44686	0.004	0.0279179	1
Dendritic_cells	CADM1	0.466939	1143	3.46998	0.004	0.0271292	1
Macrophages	CACNA2D4	-0.638351	38	5.28769	0	0.000728689	0.037
B_cells	CABIN1	0.461733	1595	3.27552	0.005	0.036758	1
Fibroblasts	CA2	-0.439177	2048	3.12566	0.008	0.0460207	1
Dendritic_cells	C8orf33	0.486483	836	3.64338	0.003	0.0204727	1
Macrophages	C6orf89	0.427602	1814	3.19871	0.006	0.0413563	1
B_cells	C5orf51	0.490657	1040	3.52085	0.004	0.0250862	1
Macrophages	C4orf48	-0.522923	395	4.06248	0.002	0.00972662	0.934
Endothelial_cells	C4orf3	0.428265	2121	3.10475	0.008	0.047356	1
Tumor	C3orf67	-0.503122	794	3.67136	0.003	0.0195218	0.999
Macrophages	C3orf38	0.460002	1128	3.48119	0.004	0.0264577	1
Tumor	C2orf54	0.443108	1935	3.15804	0.008	0.0441265	1
Macrophages	C2	0.520874	407	4.04277	0.002	0.0100795	0.94
Fibroblasts	C1S	0.438309	2075	3.11853	0.008	0.0464111	1
Macrophages	C1QC	0.456587	1188	3.45093	0.004	0.0277959	1
Macrophages	C1QB	0.526424	373	4.09629	0.001	0.00910852	0.909
Macrophages	C1QA	0.503031	561	3.87349	0.002	0.0135672	0.986
Dendritic_cells	C1orf54	0.452965	1399	3.34847	0.005	0.0331377	1
Dendritic_cells	C1orf21	0.517119	497	3.92417	0.002	0.0127011	0.978
Monocytes	C19orf66	0.438271	1748	3.22277	0.006	0.0397547	1
B_cells	C19orf25	0.590379	199	4.44757	0.001	0.00466361	0.562
Monocytes	C19orf24	0.471693	1059	3.51178	0.004	0.0253794	1
Macrophages	C19orf12	0.450952	1286	3.40126	0.005	0.0302788	1
B_cells	C16orf91	0.445452	1997	3.14109	0.008	0.0449889	1
Endothelial_cells	C16orf74	-0.478878	1010	3.53717	0.004	0.0244263	1
B_cells	C16orf54	0.555042	366	4.10259	0.001	0.00903663	0.905
Monocytes	C15orf61	0.428475	2001	3.14008	0.008	0.0450516	1
Dendritic_cells	C15orf48	-0.500408	673	3.76959	0.003	0.0164063	0.995
B_cells	C14orf119	0.516374	702	3.7468	0.003	0.0170598	0.995
B_cells	C12orf76	0.463891	1544	3.29353	0.005	0.0359076	1
B_cells	BUD13	0.487142	1097	3.49056	0.004	0.0262743	1
Fibroblasts	BTN3A3	0.59349	168	4.53075	0	0.00399283	0.472
Monocytes	BTN3A2	0.568115	212	4.42008	0.001	0.00486537	0.592
Endothelial_cells	BTN3A1	0.518929	530	3.89897	0.002	0.0130928	0.982
B_cells	BTN2A2	0.506876	807	3.66244	0.003	0.0197899	0.999
B_cells	BTN2A1	0.436386	2271	3.06729	0.008	0.049629	1
Monocytes	BTK	0.48389	879	3.62013	0.003	0.0211465	1
Mast_cells	BST2	0.583806	432	4.0093	0.002	0.0107973	0.956
Endothelial_cells	BRI3	-0.45398	1471	3.32132	0.005	0.0343682	1
Monocytes	BRD3	0.521248	465	3.96293	0.002	0.011883	0.972
Macrophages	BOLA3	-0.643644	29	5.35059	0	0.000668384	0.027
Monocytes	BOD1L1	0.419544	2278	3.06543	0.008	0.049629	1
Macrophages	BNIP3L	-0.443951	1419	3.33999	0.005	0.0335485	1
Macrophages	BNIP3	-0.7554	2	6.8979	0	0	0
Fibroblasts	BLVRA	0.473289	1263	3.41148	0.004	0.0298514	1
Macrophages	BLCAP	0.436481	1599	3.27513	0.005	0.036758	1
B_cells	BISPR	0.46346	1552	3.28992	0.005	0.0361466	1
Endothelial_cells	BIRC5	-0.438112	1852	3.18696	0.008	0.0420586	1
Macrophages	BIN2	0.544182	262	4.27054	0.001	0.00692255	0.765
B_cells	BICD1	0.460253	1634	3.26319	0.005	0.0373276	1
Mast_cells	BHLHE40	-0.504049	1456	3.32831	0.005	0.0339632	1
Macrophages	BEX3	-0.552207	232	4.35086	0.001	0.00568166	0.669
Monocytes	BECN1	0.451717	1424	3.33771	0.005	0.0337068	1
B_cells	BDP1	0.445575	1993	3.1421	0.008	0.0449441	1
Endothelial_cells	BDKRB2	-0.44051	1789	3.20712	0.006	0.0407729	1
Dendritic_cells	BCOR	0.444994	1578	3.28002	0.005	0.0366466	1
Macrophages	BCKDK	-0.48015	808	3.66226	0.003	0.0197899	0.999
Macrophages	BCAT1	-0.586101	111	4.70194	0	0.00303621	0.303
B_cells	BCAP29	0.443417	2052	3.12446	0.008	0.0461051	1
Dendritic_cells	BBX	0.430972	1927	3.16108	0.008	0.0438612	1
T_cells	BBIP1	0.463914	1208	3.4435	0.004	0.028028	1
Macrophages	BATF3	0.492871	661	3.77892	0.002	0.0161195	0.995
Dendritic_cells	BAG6	0.425738	2078	3.11713	0.008	0.0465373	1
B_cells	B3GNT2	0.4679	1461	3.3271	0.005	0.0339788	1
B_cells	B3GALT4	0.450385	1865	3.18156	0.008	0.0424913	1
Mast_cells	B2M	0.646761	133	4.61826	0	0.00352377	0.379
Macrophages	AXL	0.421497	1973	3.14658	0.008	0.0447845	1
B_cells	AVL9	0.486031	1129	3.48102	0.004	0.0264577	1
B_cells	AUP1	0.55276	386	4.081	0.002	0.00928984	0.919
Endothelial_cells	ATXN3	0.441224	1777	3.21313	0.006	0.0403015	1
Endothelial_cells	ATXN1	-0.496378	771	3.6929	0.003	0.0186891	0.998
B_cells	ATP8A1	0.436941	2249	3.07179	0.008	0.0494058	1
Macrophages	ATP6V0D2	-0.453342	1243	3.4223	0.004	0.0292563	1
Fibroblasts	ATP6V0B	-0.494912	907	3.59884	0.003	0.0219654	1
Endothelial_cells	ATP6AP2	0.462551	1303	3.39491	0.005	0.0305485	1
Monocytes	ATP5PB	0.457623	1312	3.38875	0.005	0.0309299	1
Dendritic_cells	ATP5MC1	0.426555	2053	3.12397	0.008	0.0461491	1
Fibroblasts	ATP5F1E	-0.47271	1278	3.40654	0.005	0.0299576	1
B_cells	ATP5F1A	0.479988	1236	3.42933	0.004	0.0287101	1
Macrophages	ATP13A3	-0.566294	179	4.49435	0	0.00433916	0.51
Macrophages	ATP13A2	0.464697	1036	3.523	0.004	0.0250032	1
Macrophages	ATM	0.509434	486	3.93376	0.002	0.0125445	0.977
Macrophages	ATG3	0.537437	300	4.20381	0.001	0.00769326	0.822
B_cells	ATG12	0.436201	2276	3.0658	0.008	0.049629	1
Macrophages	ATF4	-0.522112	401	4.05467	0.002	0.00984003	0.934
B_cells	ATF2	0.457169	1707	3.23758	0.006	0.0388323	1
Tumor	ATAD3A	-0.451896	1724	3.23093	0.006	0.0392823	1
B_cells	ASXL2	0.481591	1210	3.44301	0.004	0.0280565	1
B_cells	ASPSCR1	0.442677	2076	3.11842	0.008	0.0464111	1
Macrophages	ASPH	-0.517459	431	4.01005	0.002	0.0107973	0.956
B_cells	ASF1A	0.498366	923	3.58777	0.003	0.0225107	1
Macrophages	ASCL2	0.54273	273	4.25612	0.001	0.00699528	0.779
Endothelial_cells	ASCC3	-0.473469	1102	3.48973	0.004	0.0262743	1
B_cells	ASCC2	0.475424	1311	3.39056	0.005	0.0307797	1
Endothelial_cells	ART4	0.464235	1267	3.40945	0.004	0.0298818	1
Macrophages	ARSB	0.432852	1689	3.24381	0.006	0.0384822	1
Macrophages	ARRDC3	-0.512081	467	3.95882	0.002	0.0119981	0.973
Macrophages	ARRDC1	0.449202	1318	3.3859	0.005	0.0310454	1
Fibroblasts	ARMT1	0.46768	1363	3.3637	0.005	0.0323404	1
B_cells	ARMH1	0.524699	611	3.82169	0.002	0.0149603	0.993
B_cells	ARMCX6	0.445698	1987	3.14311	0.008	0.0449391	1
B_cells	ARMC8	0.503176	865	3.62987	0.003	0.0207318	1
B_cells	ARMC1	0.538082	476	3.94398	0.002	0.0123766	0.976
Endothelial_cells	ARL6IP5	0.526327	461	3.96801	0.002	0.0117443	0.97
Macrophages	ARL4D	-0.441859	1469	3.32177	0.005	0.0343682	1
T_cells	ARL4A	-0.473613	1024	3.52873	0.004	0.0248326	1
B_cells	ARL2BP	0.482084	1200	3.44722	0.004	0.0278834	1
Monocytes	ARL11	0.432989	1875	3.17807	0.008	0.0427626	1
Fibroblasts	ARID5A	0.529949	507	3.91411	0.002	0.0129439	0.98
B_cells	ARHGEF6	0.50552	828	3.65048	0.003	0.0201254	0.999
T_cells	ARHGEF3	0.447443	1527	3.30099	0.005	0.0354292	1
Monocytes	ARHGDIB	0.541321	330	4.15467	0.001	0.00830497	0.863
B_cells	ARHGAP9	0.443725	2044	3.12698	0.008	0.0459245	1
Monocytes	ARHGAP30	0.467275	1139	3.47293	0.004	0.0269736	1
Macrophages	ARHGAP25	0.645394	28	5.37155	0	0.000642808	0.025
Dendritic_cells	ARHGAP17	0.469196	1101	3.48979	0.004	0.0262743	1
Dendritic_cells	ARHGAP1	0.494118	738	3.71229	0.003	0.018258	0.997
B_cells	ARFGAP3	0.481098	1219	3.4388	0.004	0.0282173	1
Endothelial_cells	ARFGAP1	-0.429286	2095	3.11323	0.008	0.0467584	1
B_cells	ARCN1	0.490348	1045	3.51819	0.004	0.0251744	1
Tumor	APOPT1	-0.483233	1086	3.49701	0.004	0.0260284	1
Macrophages	APOL6	0.551951	236	4.34828	0.001	0.00568166	0.673
Macrophages	APOL4	0.521216	405	4.04605	0.002	0.0100642	0.94
Macrophages	APOL3	0.745966	4	6.74658	0	0	0
Macrophages	APOL2	0.440536	1506	3.31027	0.005	0.0348982	1
Macrophages	APOL1	0.472765	915	3.59538	0.003	0.0220841	1
Mast_cells	APOE	-0.504251	1450	3.32994	0.005	0.0339105	1
Macrophages	APOBEC3G	0.530778	344	4.13859	0.001	0.00845396	0.873
B_cells	APOBEC3C	0.636941	65	4.93782	0	0.00204577	0.145
Macrophages	APLP2	-0.532058	334	4.15108	0.001	0.0083112	0.864
Endothelial_cells	APLN	-0.449898	1560	3.28653	0.005	0.0363877	1
B_cells	API5	0.44946	1889	3.17396	0.008	0.0429524	1
Monocytes	APEX1	0.534598	377	4.08982	0.001	0.00922149	0.913
Dendritic_cells	APBB1IP	0.4303	1944	3.15542	0.008	0.0441792	1
B_cells	AP5M1	0.484181	1155	3.46516	0.004	0.0272378	1
B_cells	AP2B1	0.53395	518	3.90597	0.002	0.0130043	0.981
B_cells	AP2A1	0.510453	769	3.69408	0.003	0.0186477	0.998
B_cells	AP1S1	0.44613	1971	3.14664	0.008	0.0447845	1
Tumor	AP000547.3	-0.452475	1711	3.23575	0.006	0.0389574	1
Macrophages	AOAH	0.524161	389	4.07442	0.002	0.00945488	0.924
Endothelial_cells	ANXA7	0.512959	589	3.8438	0.002	0.0143414	0.99
B_cells	ANXA2R	0.593895	183	4.48307	0	0.00441454	0.519
B_cells	ANTXR2	0.505273	832	3.64831	0.003	0.0202285	1
Macrophages	ANPEP	-0.425254	1873	3.17862	0.008	0.0427296	1
Macrophages	ANO6	-0.418765	2056	3.12336	0.008	0.0461706	1
Endothelial_cells	ANKRD9	-0.465102	1250	3.41695	0.004	0.0295839	1
Macrophages	ANKRD44	0.426705	1839	3.19103	0.006	0.0417947	1
Dendritic_cells	ANKRD37	-0.466795	1145	3.46872	0.004	0.027192	1
Endothelial_cells	ANKRD28	-0.491633	830	3.65033	0.003	0.0201254	0.999
Macrophages	ANKRD22	0.574789	150	4.58252	0	0.00360434	0.42
Dendritic_cells	ANKRD12	0.518559	483	3.93766	0.002	0.0125036	0.977
Endothelial_cells	ANKRD11	-0.428827	2106	3.10941	0.008	0.0470487	1
Macrophages	ANKLE2	-0.411722	2290	3.06378	0.008	0.049629	1
Macrophages	ANKH	-0.427388	1817	3.19688	0.006	0.0414713	1
Macrophages	ANGPTL4	-0.562793	194	4.45839	0.001	0.00462552	0.553
Fibroblasts	ANGPT1	0.484968	1057	3.51204	0.004	0.0253794	1
Macrophages	ANAPC16	-0.414411	2188	3.08648	0.008	0.0486012	1
B_cells	ANAPC1	0.500031	900	3.60231	0.003	0.0219376	1
Endothelial_cells	ALYREF	-0.494592	788	3.67684	0.003	0.0193243	0.999
Macrophages	ALOX5AP	-0.575002	149	4.58475	0	0.00360434	0.419
Monocytes	ALG3	0.463721	1215	3.44183	0.004	0.0280565	1
B_cells	ALG12	0.47012	1404	3.34577	0.005	0.0333022	1
Fibroblasts	ALG1	0.448427	1809	3.20207	0.006	0.0410336	1
Macrophages	ALDOC	-0.65248	24	5.45724	0	0.000374971	0.012
Macrophages	ALDOA	-0.413814	2211	3.08143	0.008	0.0488414	1
Macrophages	ALDH2	0.586442	109	4.70558	0	0.00303621	0.301
Macrophages	ALDH1A1	0.480577	801	3.66614	0.003	0.0196852	0.999
B_cells	ALDH16A1	0.467962	1459	3.32762	0.005	0.0339788	1
Mast_cells	AL662860.1	0.545142	797	3.66865	0.003	0.019626	0.999
Dendritic_cells	AL357060.1	0.431837	1905	3.16836	0.008	0.0433763	1
Fibroblasts	AL162231.1	-0.469935	1326	3.38287	0.005	0.0312115	1
Macrophages	AL118516.1	-0.581448	121	4.65253	0	0.00338811	0.344
B_cells	AL034397.3	0.449214	1895	3.17193	0.008	0.0430908	1
Tumor	AKR1C2	-0.464154	1437	3.33382	0.005	0.033774	1
Macrophages	AKR1A1	0.490993	687	3.76157	0.003	0.0165014	0.995
Macrophages	AKIRIN2	0.53129	341	4.14359	0.001	0.00835766	0.868
B_cells	AKAP13	0.495591	973	3.5636	0.003	0.0231959	1
B_cells	AKAP10	0.481714	1206	3.44406	0.004	0.028028	1
Macrophages	AK4	-0.518185	424	4.01699	0.002	0.0106884	0.952
Dendritic_cells	AIM2	0.519328	474	3.94487	0.002	0.0123766	0.976
Monocytes	AHCY	0.423289	2151	3.09665	0.008	0.0479127	1
Macrophages	AGPAT4	-0.411594	2303	3.0627	0.008	0.049629	1
Monocytes	AGPAT3	0.490804	780	3.6823	0.003	0.0191808	0.999
Macrophages	AGAP3	-0.502732	564	3.87069	0.002	0.013634	0.986
B_cells	ADSL	0.594573	181	4.48994	0	0.00437536	0.514
B_cells	ADPGK	0.465187	1516	3.30436	0.005	0.0352972	1
Macrophages	ADNP	-0.437676	1565	3.28547	0.005	0.03639	1
Macrophages	ADM	-0.627337	45	5.15909	0	0.00115376	0.065
Macrophages	ADI1	0.487236	725	3.72701	0.003	0.0176544	0.997
Macrophages	ADCY3	-0.590028	102	4.74397	0	0.00280934	0.267
Endothelial_cells	ADARB1	-0.424949	2226	3.07725	0.008	0.0491293	1
Neutrophils	ADAR	0.663004	510	3.91014	0.002	0.0130043	0.98
Endothelial_cells	ADAMTS7	-0.579235	182	4.48522	0	0.00441217	0.516
Macrophages	ADAM8	-0.444634	1401	3.34595	0.005	0.0333022	1
Dendritic_cells	ADA2	0.587419	132	4.61876	0	0.00352377	0.378
Macrophages	ACTN4	-0.424656	1892	3.17351	0.008	0.0429524	1
Monocytes	ACTG1	0.428571	1998	3.14089	0.008	0.0449945	1
Macrophages	ACP2	0.417997	2080	3.11684	0.008	0.0465551	1
Tumor	ACOT7	-0.492831	940	3.58058	0.003	0.0226736	1
B_cells	ACO2	0.485415	1138	3.47573	0.004	0.0267467	1
B_cells	AC120193.1	0.465988	1503	3.31107	0.005	0.0348257	1
B_cells	AC118549.1	0.461733	1596	3.27552	0.005	0.036758	1
Monocytes	AC116366.3	0.455462	1349	3.37004	0.005	0.0320181	1
Dendritic_cells	AC097375.1	0.432797	1883	3.17645	0.008	0.0427937	1
B_cells	AC090152.1	0.46272	1569	3.28375	0.005	0.0364945	1
B_cells	AC027097.1	0.437064	2244	3.07279	0.008	0.0493587	1
Macrophages	AC026310.2	-0.536754	305	4.19709	0.001	0.00773963	0.826
Monocytes	AC015912.3	-0.427515	2032	3.13202	0.008	0.045491	1
Endothelial_cells	AC010642.2	-0.519592	521	3.90513	0.002	0.0130043	0.981
Fibroblasts	AC007388.1	0.469935	1327	3.38287	0.005	0.0312115	1
T_cells	AC006369.1	0.451333	1436	3.3344	0.005	0.033772	1
B_cells	ABT1	0.540426	462	3.96565	0.002	0.0118298	0.97
Endothelial_cells	ABL1	-0.424541	2241	3.07388	0.008	0.0493045	1
Monocytes	ABI3	0.536086	364	4.10412	0.001	0.00903663	0.905
Dendritic_cells	ABHD6	0.513373	542	3.88921	0.002	0.0132435	0.985
B_cells	ABHD14B	0.567993	286	4.22663	0.001	0.00749378	0.805
Dendritic_cells	ABCE1	0.478223	956	3.56959	0.003	0.0231261	1
B_cells	ABCB7	0.536479	493	3.9292	0.002	0.0126052	0.978
B_cells	AATF	0.47012	1403	3.34577	0.005	0.0333022	1
B_cells	AASDHPPT	0.469627	1416	3.34162	0.005	0.033478	1
B_cells	AAK1	0.548504	409	4.04095	0.002	0.0100795	0.94
Macrophages	AAGAB	0.492444	665	3.77497	0.002	0.0162602	0.995
Macrophages	A1BG	-0.572953	157	4.56336	0	0.00374347	0.442
B_cells	SEPTIN9	0.439285	2169	3.09081	0.008	0.0483624	1
B_cells	SEPTIN1	0.47197	1369	3.36136	0.005	0.0324102	1

## Sheet: Table S2
Table S2 The result of univariate Cox regression analysis of TPS genes.
gene	coef	HR	95% CI	p.value
ZRSR2	0.39129	1.5	(1.1-1.9)	0.0052
ZNF672	0.279306	1.3	(0.95-1.8)	0.094
ZNF638	0.368997	1.4	(1-2.1)	0.04
ZNF493	0.24949	1.3	(0.92-1.8)	0.14
ZNF460	0.314094	1.4	(0.89-2.1)	0.16
ZNF430	0.209158	1.2	(0.95-1.6)	0.12
ZNF395	0.316103	1.4	(1.1-1.7)	0.0094
ZNF394	0.14019	1.2	(0.8-1.7)	0.45
ZNF330	0.248618	1.3	(0.91-1.8)	0.15
ZNF302	0.0832245	1.1	(0.83-1.4)	0.54
ZNF274	0.0156369	1	(0.78-1.3)	0.91
ZNF267	0.250613	1.3	(0.99-1.7)	0.061
ZNF24	0.281468	1.3	(0.93-1.9)	0.12
ZNF22	0.253955	1.3	(0.94-1.8)	0.12
ZNF195	0.464301	1.6	(1.2-2.1)	0.0012
ZMYM5	0.329912	1.4	(0.99-2)	0.059
ZKSCAN1	-0.0905333	0.91	(0.75-1.1)	0.38
ZC3H7A	0.217313	1.2	(0.92-1.7)	0.16
ZC3H14	0.402576	1.5	(1.1-2.1)	0.019
ZC3H13	-0.120643	0.89	(0.73-1.1)	0.21
ZBED5	0.38657	1.5	(1.1-1.9)	0.003
ZBED1	0.159383	1.2	(0.85-1.6)	0.34
ZAP70	-0.194763	0.82	(0.66-1)	0.08
YWHAQ	0.506197	1.7	(1.3-2.1)	0.00012
YWHAH	0.466391	1.6	(1.3-2)	0.00016
YTHDC2	0.196225	1.2	(0.9-1.7)	0.21
YLPM1	0.337372	1.4	(1-2)	0.047
YIPF3	0.275931	1.3	(0.99-1.8)	0.06
XPO6	0.604223	1.8	(1.3-2.6)	0.00057
XPNPEP1	0.627476	1.9	(1.3-2.7)	0.00051
XPA	0.426364	1.5	(1-2.3)	0.03
XCR1	-0.482118	0.62	(0.35-1.1)	0.096
WDR70	0.645115	1.9	(1.3-2.8)	0.00063
WDR43	0.584852	1.8	(1.3-2.4)	0.00021
VWA1	0.137283	1.1	(0.93-1.4)	0.2
VRK3	0.285599	1.3	(0.9-2)	0.16
VRK2	0.590254	1.8	(1.4-2.4)	2.8e-05
VPS72	0.581876	1.8	(1.4-2.3)	5.7e-06
VPS4A	0.311152	1.4	(0.97-1.9)	0.073
VPS13D	0.0697779	1.1	(0.75-1.5)	0.7
VPS13B	0.210589	1.2	(0.91-1.7)	0.18
VKORC1	0.199513	1.2	(0.95-1.6)	0.12
VEGFA	0.344881	1.4	(1.1-1.8)	0.0033
VDAC3	0.221582	1.2	(0.91-1.7)	0.17
VDAC2	0.545238	1.7	(1.3-2.3)	0.00052
VDAC1	0.578758	1.8	(1.3-2.5)	0.0013
VCPIP1	0.294062	1.3	(0.95-1.9)	0.094
VCAM1	0.063551	1.1	(0.95-1.2)	0.28
VASP	0.376487	1.5	(1.2-1.8)	0.00099
VAMP8	0.199207	1.2	(0.99-1.5)	0.068
VAMP5	-0.0670179	0.94	(0.72-1.2)	0.62
UVRAG	0.290034	1.3	(0.95-1.9)	0.099
USP4	0.23066	1.3	(0.91-1.7)	0.17
USP39	0.81335	2.3	(1.5-3.3)	2.8e-05
USP11	0.311924	1.4	(1.1-1.8)	0.02
USP10	0.345882	1.4	(1-2)	0.045
UQCRQ	-0.156899	0.85	(0.65-1.1)	0.27
UPP1	0.307758	1.4	(1.1-1.7)	0.0025
UGP2	-0.240879	0.79	(0.64-0.97)	0.024
UCP2	0.0573256	1.1	(0.89-1.3)	0.51
UBQLN2	0.319027	1.4	(1-1.8)	0.025
UBN1	0.325435	1.4	(1-1.9)	0.053
UBL5	0.194815	1.2	(0.85-1.7)	0.28
UBE4A	0.308554	1.4	(1-1.8)	0.043
UBE2S	0.43948	1.6	(1.3-1.8)	9.4e-07
UBE2Q1	0.488041	1.6	(1.2-2.2)	0.0012
UBE2M	0.496436	1.6	(1.2-2.2)	0.0004
UBE2L6	0.153423	1.2	(0.94-1.4)	0.16
UBE2E1	0.763616	2.1	(1.6-3)	3.2e-06
UBE2B	0.423136	1.5	(1-2.2)	0.029
UBAP2L	0.566518	1.8	(1.3-2.3)	6.3e-05
UAP1L1	0.342008	1.4	(1.2-1.6)	1.7e-05
TXNIP	-0.124575	0.88	(0.77-1)	0.071
TXN2	0.331691	1.4	(0.97-2)	0.072
TWSG1	0.215964	1.2	(0.99-1.6)	0.06
TWF2	0.263672	1.3	(1-1.6)	0.023
TUBB3	0.150877	1.2	(0.93-1.5)	0.19
TTC1	0.819973	2.3	(1.5-3.4)	8.1e-05
TSPYL4	0.139851	1.2	(0.93-1.4)	0.19
TSPO	0.175413	1.2	(1-1.4)	0.027
TSPAN4	0.275431	1.3	(1-1.7)	0.033
TSEN34	0.714814	2	(1.4-2.9)	6.5e-05
TSC22D3	-0.137727	0.87	(0.75-1)	0.079
TRPV2	0.198465	1.2	(1-1.5)	0.041
TRPC4AP	0.843926	2.3	(1.6-3.5)	3.7e-05
TRIP12	0.430028	1.5	(1.1-2.1)	0.0079
TRIM26	0.0531786	1.1	(0.78-1.4)	0.73
TRIM25	0.492882	1.6	(1.2-2.3)	0.0025
TRIM22	-0.0535396	0.95	(0.82-1.1)	0.48
TRIM21	0.408813	1.5	(1.1-2)	0.0062
TRIM14	0.12724	1.1	(0.86-1.5)	0.37
TREM1	0.342271	1.4	(1.2-1.6)	4.4e-06
TRAT1	-0.299128	0.74	(0.53-1)	0.074
TRAPPC4	0.694693	2	(1.5-2.7)	3.2e-06
TRAPPC2L	0.254776	1.3	(0.99-1.7)	0.062
TRAFD1	0.361556	1.4	(1.1-1.9)	0.017
TRAF3IP3	-0.216041	0.81	(0.6-1.1)	0.15
TPR	0.335272	1.4	(1.1-1.8)	0.015
TPI1	0.608593	1.8	(1.4-2.5)	6.3e-05
TOR1AIP1	0.0241599	1	(0.79-1.3)	0.85
TOR1A	0.201721	1.2	(0.83-1.8)	0.3
TOPORS	0.187961	1.2	(0.89-1.6)	0.22
TNS1	0.168852	1.2	(0.94-1.5)	0.15
TNKS2	0.0413695	1	(0.8-1.4)	0.76
TNK2	0.181801	1.2	(0.91-1.6)	0.19
TNFSF14	-0.0448208	0.96	(0.85-1.1)	0.45
TNFSF13	0.120255	1.1	(0.89-1.4)	0.31
TNFSF10	0.0371343	1	(0.88-1.2)	0.65
TNFRSF25	0.0620886	1.1	(0.85-1.3)	0.58
TNFRSF14	0.293697	1.3	(1-1.7)	0.025
TNFRSF10D	0.0673006	1.1	(0.84-1.4)	0.59
TMUB2	0.490043	1.6	(1.2-2.3)	0.0049
TMSB4X	0.172052	1.2	(1-1.4)	0.056
TMEM45A	0.156476	1.2	(1-1.3)	0.0046
TMEM176A	0.0329089	1	(0.86-1.2)	0.73
TMEM165	0.420703	1.5	(1.2-1.9)	0.00031
TMEM140	-0.0222872	0.98	(0.77-1.2)	0.86
TMEM134	-0.0301341	0.97	(0.69-1.4)	0.86
TMEM109	0.328422	1.4	(1-1.9)	0.027
TMEM106B	0.242362	1.3	(0.99-1.6)	0.062
TMED3	0.11629	1.1	(0.98-1.3)	0.089
TMED2	0.222275	1.2	(0.99-1.6)	0.066
TMCO3	0.371278	1.4	(1.2-1.8)	0.00012
TM9SF2	0.227782	1.3	(0.99-1.6)	0.057
TLR8	0.113892	1.1	(0.85-1.5)	0.42
TLR7	0.31025	1.4	(1-1.8)	0.034
TINF2	0.318346	1.4	(0.95-2)	0.093
TIMP1	0.0631796	1.1	(0.96-1.2)	0.22
TIMM8A	0.131886	1.1	(0.85-1.5)	0.38
TIMM23	0.916914	2.5	(1.8-3.6)	3.4e-07
THRAP3	0.386643	1.5	(1-2.1)	0.033
THAP7	0.409754	1.5	(1.1-2.2)	0.025
THAP4	0.465982	1.6	(1.2-2.2)	0.0041
THAP1	0.326786	1.4	(0.98-2)	0.062
TGFBR1	0.267942	1.3	(0.98-1.7)	0.068
TGFB1	0.203506	1.2	(1.1-1.4)	0.0092
TFPI	0.0700307	1.1	(0.9-1.3)	0.42
TFF3	-0.0559982	0.95	(0.83-1.1)	0.41
TFEC	0.193141	1.2	(0.94-1.6)	0.13
TFCP2	0.281115	1.3	(0.98-1.8)	0.07
TEX264	0.171836	1.2	(0.82-1.7)	0.37
TCN2	0.352907	1.4	(1.1-1.8)	0.0013
TBRG4	0.715624	2	(1.4-3)	0.00036
TBP	0.629796	1.9	(1.3-2.7)	0.00041
TBC1D9B	0.160673	1.2	(0.84-1.6)	0.35
TBC1D5	0.273551	1.3	(0.94-1.8)	0.1
TAX1BP1	0.304156	1.4	(0.98-1.9)	0.068
TAPBPL	0.00221106	1	(0.79-1.3)	0.99
TAPBP	0.0184566	1	(0.75-1.4)	0.9
TAP2	0.144097	1.2	(0.89-1.5)	0.27
TAP1	0.115056	1.1	(0.94-1.3)	0.2
TAOK3	0.127134	1.1	(0.81-1.6)	0.45
TACSTD2	0.0845373	1.1	(0.96-1.2)	0.2
SYTL2	-0.016949	0.98	(0.76-1.3)	0.9
SYNE2	-0.0496068	0.95	(0.78-1.2)	0.63
SYMPK	0.342338	1.4	(1-1.9)	0.025
SUPT4H1	0.6362	1.9	(1.3-2.7)	0.00036
STYXL1	0.432261	1.5	(1.2-2)	0.00091
STXBP2	0.301221	1.4	(1-1.8)	0.023
STX8	0.171605	1.2	(0.88-1.6)	0.25
STX6	0.598553	1.8	(1.4-2.4)	6.8e-05
STX11	0.183183	1.2	(0.95-1.5)	0.12
STK25	0.785931	2.2	(1.5-3.1)	1.5e-05
STIP1	0.731135	2.1	(1.6-2.8)	3.9e-07
STAT2	0.0277727	1	(0.75-1.4)	0.87
STAT1	0.0524227	1.1	(0.89-1.2)	0.54
STAG2	0.224193	1.3	(0.96-1.6)	0.1
ST6GAL1	-0.13086	0.88	(0.74-1)	0.14
ST3GAL6	-0.155393	0.86	(0.7-1)	0.12
ST3GAL5	0.151465	1.2	(0.9-1.5)	0.25
ST3GAL4	0.349032	1.4	(1.1-1.8)	0.0045
ST13	0.378588	1.5	(1.1-2)	0.015
SSRP1	0.722366	2.1	(1.5-2.8)	3.5e-06
SSBP3	0.162138	1.2	(0.92-1.5)	0.2
SPTLC2	0.494593	1.6	(1.2-2.3)	0.005
SPTLC1	0.228986	1.3	(0.97-1.6)	0.083
SPTBN5	0.116632	1.1	(0.8-1.6)	0.5
SPTBN1	0.0455089	1	(0.8-1.4)	0.74
SPRY4	0.277237	1.3	(1-1.7)	0.019
SPPL2B	0.119612	1.1	(0.82-1.5)	0.46
SPP1	0.148748	1.2	(1.1-1.2)	3e-06
SPOP	0.490573	1.6	(1.1-2.4)	0.014
SPOCK1	0.102987	1.1	(0.94-1.3)	0.22
SPI1	0.146075	1.2	(0.95-1.4)	0.14
SPAG9	0.212654	1.2	(0.93-1.6)	0.14
SPAG7	-0.0642367	0.94	(0.67-1.3)	0.71
SP140	0.0251995	1	(0.8-1.3)	0.84
SP110	0.296055	1.3	(0.98-1.8)	0.063
SP100	0.10328	1.1	(0.79-1.6)	0.55
SOX11	0.936027	2.5	(1.6-4.2)	0.00019
SON	0.205853	1.2	(0.92-1.6)	0.16
SOD3	0.026912	1	(0.91-1.2)	0.66
SOCS3	0.0209065	1	(0.9-1.2)	0.75
SNX4	0.331376	1.4	(1-1.9)	0.034
SNX27	0.346435	1.4	(1.1-1.8)	0.011
SNX2	0.515794	1.7	(1.2-2.3)	0.0026
SNX11	0.662672	1.9	(1.3-2.9)	0.00091
SNX1	-0.0059724	0.99	(0.7-1.4)	0.97
SNRPN	0.1421	1.2	(0.98-1.4)	0.092
SNRPG	0.601419	1.8	(1.3-2.6)	0.00045
SNRPF	0.447449	1.6	(1.2-2.1)	0.0031
SNRPD3	0.405597	1.5	(1.1-2.1)	0.022
SNAPC5	0.432323	1.5	(1-2.3)	0.032
SNAPC2	0.701065	2	(1.4-2.8)	3.9e-05
SNAPC1	0.397582	1.5	(1.1-2)	0.0072
SNAI1	0.0100294	1	(0.84-1.2)	0.91
SMS	0.736093	2.1	(1.6-2.7)	5e-09
SMOX	0.404177	1.5	(1.3-1.8)	5.9e-06
SMC6	0.253623	1.3	(1-1.7)	0.054
SMARCC2	0.182033	1.2	(0.94-1.5)	0.13
SMARCC1	0.514296	1.7	(1.2-2.3)	0.00075
SLTM	0.168166	1.2	(0.85-1.6)	0.32
SLCO4A1	0.176485	1.2	(0.98-1.4)	0.075
SLC7A7	0.229255	1.3	(1.1-1.5)	0.0084
SLC5A3	0.303831	1.4	(1.1-1.7)	0.013
SLC4A7	0.359161	1.4	(1.1-1.8)	0.0034
SLC43A3	0.10377	1.1	(0.93-1.3)	0.26
SLC39A4	0.0955627	1.1	(0.98-1.2)	0.11
SLC38A1	0.25756	1.3	(1.1-1.5)	4.9e-05
SLC31A2	0.0532365	1.1	(0.81-1.4)	0.7
SLC2A9	-0.0268931	0.97	(0.83-1.1)	0.74
SLC2A6	0.208717	1.2	(1-1.5)	0.017
SLC2A5	0.18083	1.2	(1-1.4)	0.011
SLC2A3	0.0905495	1.1	(0.93-1.3)	0.28
SLC2A1	0.421594	1.5	(1.3-1.8)	7.3e-08
SLC26A6	0.374365	1.5	(1.2-1.8)	0.00069
SLC25A6	0.303091	1.4	(1-1.8)	0.028
SLC25A37	0.046289	1	(0.8-1.4)	0.74
SLC25A36	0.145831	1.2	(0.97-1.4)	0.11
SLC16A3	0.335778	1.4	(1.2-1.6)	8.4e-07
SLC16A10	0.0602189	1.1	(0.85-1.3)	0.6
SLC12A9	0.351264	1.4	(1.1-1.9)	0.011
SLC12A7	0.394825	1.5	(1.1-1.9)	0.0044
SLC11A1	0.352144	1.4	(1.2-1.7)	8.1e-05
SLAMF7	-0.0267022	0.97	(0.83-1.1)	0.74
SKAP2	0.327821	1.4	(1.1-1.7)	0.0026
SIPA1L3	0.252474	1.3	(1-1.6)	0.036
SIPA1L1	0.18299	1.2	(0.84-1.7)	0.32
SIDT2	0.0246743	1	(0.74-1.4)	0.88
SHMT2	0.377366	1.5	(1.1-1.9)	0.0083
SH3BP2	-0.00485703	1	(0.75-1.3)	0.97
SH3BGRL3	0.306602	1.4	(1.1-1.6)	0.0017
SH3BGRL	0.0610308	1.1	(0.89-1.3)	0.5
SH2B1	0.208356	1.2	(0.89-1.7)	0.21
SGSH	0.404354	1.5	(1.1-2.1)	0.012
SGCD	0.0616872	1.1	(0.75-1.5)	0.73
SFXN1	-0.0581131	0.94	(0.75-1.2)	0.62
SFT2D2	0.472229	1.6	(1.2-2.2)	0.0025
SFN	0.169412	1.2	(1.1-1.3)	0.00031
SF3B5	0.437994	1.5	(1.2-2.1)	0.0022
SF3B4	0.64282	1.9	(1.5-2.4)	5.6e-07
SF3A2	0.430745	1.5	(1.2-2)	0.00096
SF3A1	0.390241	1.5	(1.1-2)	0.018
SETD5	0.30184	1.4	(1-1.8)	0.024
SETD3	0.567197	1.8	(1.2-2.7)	0.0079
SERPINH1	0.202956	1.2	(1-1.4)	0.015
SERPING1	-0.238021	0.79	(0.66-0.95)	0.01
SERPINE1	0.124898	1.1	(1-1.3)	0.017
SERPINB2	0.180067	1.2	(0.9-1.6)	0.21
SERPINA1	0.0414738	1	(0.88-1.2)	0.63
SEPHS2	-0.083657	0.92	(0.71-1.2)	0.53
SEPHS1	0.969288	2.6	(1.8-3.8)	8.6e-08
SENP7	0.229406	1.3	(0.94-1.7)	0.12
SEMA6B	0.0779573	1.1	(0.83-1.4)	0.57
SEMA3F	0.410862	1.5	(1.1-2)	0.0056
SEMA3A	0.415576	1.5	(1.1-2.1)	0.008
SELL	-0.11185	0.89	(0.73-1.1)	0.27
SECTM1	0.091796	1.1	(0.93-1.3)	0.29
SEC61G	0.350261	1.4	(1.1-1.8)	0.0023
SEC24D	0.126587	1.1	(0.89-1.5)	0.32
SEC23A	0.191066	1.2	(0.95-1.5)	0.12
SDHD	0.0254844	1	(0.75-1.4)	0.87
SDHC	0.149735	1.2	(0.89-1.5)	0.27
SDHB	-0.0115527	0.99	(0.7-1.4)	0.95
SDF2	0.634057	1.9	(1.3-2.8)	0.0013
SDC2	-0.033245	0.97	(0.79-1.2)	0.75
SDAD1	0.316518	1.4	(1-1.8)	0.029
SCPEP1	0.223359	1.3	(1.1-1.4)	0.0031
SCML1	0.140471	1.2	(0.92-1.4)	0.21
SCFD1	0.373835	1.5	(1-2)	0.03
SCARF1	0.0628127	1.1	(0.78-1.5)	0.7
SBNO1	0.504589	1.7	(1.1-2.4)	0.0069
SAT1	-0.272813	0.76	(0.55-1.1)	0.098
SAP30	0.657335	1.9	(1.5-2.5)	2.1e-06
SAMHD1	0.0670399	1.1	(0.87-1.3)	0.53
SAMD9	0.114472	1.1	(0.88-1.4)	0.35
S100PBP	0.539262	1.7	(1.3-2.3)	0.00019
S100A9	0.238741	1.3	(1.2-1.4)	1.8e-06
S100A8	0.160247	1.2	(1-1.3)	0.0078
S100A2	0.26048	1.3	(1.1-1.5)	0.0024
S100A10	0.325394	1.4	(1.2-1.6)	0.0002
RUNX1	0.126089	1.1	(0.89-1.4)	0.31
RTP4	-0.0583805	0.94	(0.79-1.1)	0.51
RTN1	0.200893	1.2	(0.98-1.5)	0.07
RTF1	0.185331	1.2	(0.82-1.8)	0.35
RSU1	0.618856	1.9	(1.4-2.5)	0.00012
RSAD2	0.0357576	1	(0.85-1.3)	0.72
RRP12	0.651768	1.9	(1.5-2.5)	4.4e-06
RRAGA	0.305421	1.4	(1-1.8)	0.046
RRAD	0.0999085	1.1	(0.95-1.3)	0.21
RPS6KA4	0.512226	1.7	(1.2-2.3)	0.0024
RPS26	0.00283562	1	(0.76-1.3)	0.98
RPS20	0.167369	1.2	(0.92-1.5)	0.18
RPS17	0.0670504	1.1	(0.78-1.5)	0.68
RPP38	0.692923	2	(1.4-2.8)	9.7e-05
RPL7	0.22876	1.3	(1-1.6)	0.044
RPL39L	0.104702	1.1	(0.98-1.3)	0.096
RPL36	0.152809	1.2	(0.93-1.5)	0.19
RPL35	0.226202	1.3	(0.99-1.6)	0.06
RP2	0.250151	1.3	(1-1.6)	0.043
RNPEP	0.249729	1.3	(0.96-1.7)	0.097
RNF8	0.670843	2	(1.4-2.8)	0.00031
RNF7	0.667907	2	(1.4-2.7)	9.7e-05
RNF41	0.43799	1.5	(1.1-2.3)	0.027
RNF20	0.467697	1.6	(1.2-2.2)	0.0026
RNASEH2B	0.390377	1.5	(1-2.1)	0.031
RNASE1	0.150196	1.2	(0.98-1.4)	0.086
RLF	0.45729	1.6	(1.2-2.1)	0.0022
RIPK2	0.381996	1.5	(1.2-1.8)	0.00079
RHOC	0.425384	1.5	(1.2-1.9)	0.0005
RHOB	-0.11764	0.89	(0.74-1.1)	0.21
RHBDF2	0.253095	1.3	(1-1.6)	0.016
RGS16	0.0568847	1.1	(0.92-1.2)	0.42
RFX5	0.212286	1.2	(0.98-1.6)	0.078
RFC1	0.206516	1.2	(0.92-1.6)	0.17
REST	0.397558	1.5	(1.1-2)	0.013
REPIN1	0.23742	1.3	(0.93-1.7)	0.13
RELN	0.0230811	1	(0.93-1.1)	0.63
RECQL	0.285941	1.3	(1-1.7)	0.023
RDH14	0.468037	1.6	(1.1-2.4)	0.023
RCN1	0.189581	1.2	(0.99-1.5)	0.057
RBMX2	0.590456	1.8	(1.3-2.5)	0.0003
RBM23	0.0280165	1	(0.77-1.4)	0.85
RBM17	0.843497	2.3	(1.7-3.2)	4.4e-07
RBM15B	0.665667	1.9	(1.4-2.8)	0.00031
RBL2	-0.040876	0.96	(0.79-1.2)	0.68
RBCK1	0.342486	1.4	(1.1-1.8)	0.0091
RBBP7	0.546315	1.7	(1.3-2.3)	0.00038
RBBP4	0.528434	1.7	(1.3-2.2)	4.5e-05
RASA4	0.372216	1.5	(0.79-2.7)	0.23
RARRES2	-0.145926	0.86	(0.74-1)	0.058
RAPGEF2	-0.181329	0.83	(0.64-1.1)	0.18
RAP1GDS1	0.326214	1.4	(1-1.9)	0.028
RANGAP1	0.428396	1.5	(1.2-2)	0.00054
RALY	0.533835	1.7	(1.3-2.3)	0.00025
RALA	0.570286	1.8	(1.3-2.3)	6.7e-05
RAI14	0.173335	1.2	(0.94-1.5)	0.15
RAD51C	0.626931	1.9	(1.4-2.5)	3.5e-05
RAD23B	0.0901879	1.1	(0.8-1.5)	0.58
RAD23A	0.277485	1.3	(0.92-1.9)	0.14
RAD17	0.420725	1.5	(1-2.3)	0.036
RAC3	0.212793	1.2	(1-1.5)	0.026
RABGGTB	0.605112	1.8	(1.3-2.5)	0.0001
RABGAP1L	0.149158	1.2	(0.87-1.5)	0.31
RABEPK	0.102994	1.1	(0.91-1.4)	0.31
RABEP2	0.173157	1.2	(0.89-1.6)	0.24
RAB8B	0.251318	1.3	(1-1.6)	0.038
RAB8A	-0.0583582	0.94	(0.68-1.3)	0.73
RAB33A	-0.0569692	0.94	(0.66-1.3)	0.75
RAB1B	0.491105	1.6	(1.1-2.3)	0.0077
RAB1A	0.417983	1.5	(1.1-2.1)	0.0093
RAB14	0.139951	1.2	(0.81-1.6)	0.43
RAB11FIP1	0.0392576	1	(0.88-1.2)	0.66
RAB11B	0.0697993	1.1	(0.73-1.6)	0.73
QRSL1	0.681623	2	(1.4-2.9)	0.00036
PYCR1	0.160601	1.2	(1-1.3)	0.0055
PVT1	0.232743	1.3	(1-1.5)	0.021
PUS7L	0.50305	1.7	(1.2-2.3)	0.0047
PTRH2	0.549004	1.7	(1.3-2.3)	0.00017
PTPRN2	0.0255396	1	(0.8-1.3)	0.84
PTPRC	-0.0378532	0.96	(0.83-1.1)	0.63
PTPN7	-0.0497221	0.95	(0.77-1.2)	0.65
PTPN6	0.15513	1.2	(0.88-1.5)	0.28
PTPN22	-0.0918946	0.91	(0.69-1.2)	0.53
PTP4A1	-0.0882631	0.92	(0.75-1.1)	0.4
PTGS2	0.0597902	1.1	(0.85-1.3)	0.59
PTGER4	0.218866	1.2	(1-1.5)	0.048
PTGER2	-0.118113	0.89	(0.65-1.2)	0.47
PSTPIP2	-0.132078	0.88	(0.71-1.1)	0.23
PSPC1	0.489227	1.6	(1.2-2.2)	0.0027
PSME2	0.189408	1.2	(0.91-1.6)	0.2
PSME1	0.148958	1.2	(0.83-1.6)	0.39
PSMD7	0.625041	1.9	(1.3-2.6)	0.00041
PSMC2	0.426406	1.5	(1-2.2)	0.028
PSMB9	0.0830367	1.1	(0.92-1.3)	0.32
PSMB8	0.0209045	1	(0.84-1.2)	0.83
PSMB10	0.0879898	1.1	(0.88-1.4)	0.42
PSMA6	0.279377	1.3	(0.95-1.8)	0.099
PSIP1	0.271644	1.3	(1.1-1.6)	0.014
PSEN2	0.258089	1.3	(0.98-1.7)	0.07
PRRC1	0.238539	1.3	(1-1.6)	0.049
PRR7	0.391576	1.5	(1.2-1.9)	0.00078
PRPS2	0.118343	1.1	(0.91-1.4)	0.27
PRPF8	0.175276	1.2	(0.89-1.6)	0.24
PRPF4B	0.326548	1.4	(1.1-1.8)	0.015
PRPF31	0.542937	1.7	(1.2-2.4)	0.002
PRPF3	0.486985	1.6	(1.3-2.1)	0.00015
PROS1	0.0127405	1	(0.85-1.2)	0.89
PRNP	0.219893	1.2	(1-1.5)	0.016
PRMT2	0.354127	1.4	(1.1-1.9)	0.011
PRCP	0.0838632	1.1	(0.85-1.4)	0.51
PPWD1	0.295066	1.3	(0.98-1.8)	0.068
PPP4R1	0.413057	1.5	(1.1-2)	0.0053
PPP1R7	0.537991	1.7	(1.2-2.5)	0.0038
PPP1R15A	0.199566	1.2	(1-1.5)	0.025
PPP1R14B	0.400892	1.5	(1.2-1.8)	0.00024
PPP1R12A	0.287422	1.3	(1-1.8)	0.046
PPP1R11	0.218717	1.2	(0.92-1.7)	0.16
PPP1CB	0.661316	1.9	(1.4-2.6)	2.3e-05
PPM1G	0.913649	2.5	(1.8-3.4)	2.5e-08
PPIH	0.648973	1.9	(1.5-2.5)	3.6e-06
PPIE	0.628276	1.9	(1.3-2.6)	0.00029
PPID	0.00263827	1	(0.74-1.4)	0.99
PPFIBP2	0.175245	1.2	(0.85-1.7)	0.31
PPFIBP1	0.177242	1.2	(0.91-1.6)	0.19
PPCS	0.675877	2	(1.3-2.9)	0.00096
PPA1	0.301312	1.4	(1-1.8)	0.029
POLR2H	0.569573	1.8	(1.3-2.3)	4.2e-05
POLE3	0.402133	1.5	(1.2-1.9)	0.0023
PNRC2	0.467705	1.6	(1.2-2.2)	0.0024
PNN	0.281826	1.3	(1-1.7)	0.043
PMPCA	0.337879	1.4	(1-1.9)	0.031
PML	0.256265	1.3	(0.95-1.8)	0.11
PMAIP1	0.338082	1.4	(1.2-1.7)	0.00067
PLSCR1	0.13773	1.1	(0.97-1.4)	0.11
PLP2	0.200099	1.2	(1.1-1.4)	0.004
PLK3	0.16566	1.2	(0.94-1.5)	0.15
PLEKHF2	0.267485	1.3	(1-1.6)	0.023
PLEKHA1	0.184526	1.2	(0.91-1.6)	0.2
PLEK2	0.108045	1.1	(0.99-1.2)	0.063
PLCD1	0.128922	1.1	(0.83-1.6)	0.42
PLAUR	0.234914	1.3	(1.1-1.5)	0.0018
PLAU	0.177912	1.2	(1-1.4)	0.035
PLAC8	0.122983	1.1	(0.95-1.3)	0.17
PLA2G2D	-0.0431015	0.96	(0.8-1.1)	0.63
PKN2	0.362177	1.4	(1-2)	0.025
PITPNB	0.202134	1.2	(0.87-1.7)	0.25
PIN4	0.420781	1.5	(1.1-2.1)	0.0068
PILRB	0.125798	1.1	(0.93-1.4)	0.22
PIK3CD	0.0785008	1.1	(0.86-1.4)	0.5
PIGB	0.0848607	1.1	(0.78-1.5)	0.62
PICALM	0.286336	1.3	(0.96-1.8)	0.086
PIAS1	0.22537	1.3	(0.93-1.7)	0.14
PHLDA2	0.253897	1.3	(1.1-1.5)	0.00019
PHLDA1	-0.0219485	0.98	(0.83-1.1)	0.79
PHF3	0.0895669	1.1	(0.86-1.4)	0.47
PHF11	-0.0507296	0.95	(0.68-1.3)	0.77
PHC3	0.173276	1.2	(0.87-1.6)	0.27
PHC2	0.632966	1.9	(1.4-2.5)	2.7e-05
PGK1	0.370455	1.4	(1.2-1.8)	0.00088
PGGT1B	0.387667	1.5	(0.95-2.3)	0.087
PGF	0.233906	1.3	(1.1-1.5)	0.0025
PGAM1	0.322294	1.4	(1-1.9)	0.032
PFKFB3	0.171775	1.2	(1.1-1.3)	0.0048
PEX11B	0.353957	1.4	(1.1-1.9)	0.012
PERP	0.206836	1.2	(1-1.5)	0.031
PEPD	0.0513063	1.1	(0.84-1.3)	0.65
PELI1	0.235446	1.3	(1-1.6)	0.024
PDPN	0.159904	1.2	(0.95-1.4)	0.13
PDPK1	0.0951123	1.1	(0.85-1.4)	0.47
PDLIM7	0.286493	1.3	(1.1-1.6)	0.0072
PDLIM2	-0.026587	0.97	(0.72-1.3)	0.86
PDLIM1	0.0985024	1.1	(0.86-1.4)	0.44
PDK1	0.215437	1.2	(0.98-1.6)	0.073
PDIA3	0.15603	1.2	(0.88-1.6)	0.29
PDHB	0.289388	1.3	(0.92-1.9)	0.13
PDHA1	0.316434	1.4	(0.98-1.9)	0.065
PDGFB	0.0777688	1.1	(0.86-1.4)	0.51
PDE8A	-0.0451534	0.96	(0.7-1.3)	0.78
PDE4A	0.237944	1.3	(1-1.6)	0.027
PDCD2	0.70032	2	(1.4-2.9)	8.4e-05
PDCD1LG2	-0.0520505	0.95	(0.71-1.3)	0.72
PCSK7	0.111177	1.1	(0.8-1.6)	0.51
PCK2	-0.125063	0.88	(0.77-1)	0.083
PCGF2	0.315278	1.4	(1.1-1.7)	0.01
PCGF1	0.57039	1.8	(1.2-2.6)	0.0056
PARVB	0.124313	1.1	(0.94-1.4)	0.19
PARP4	0.169575	1.2	(0.91-1.5)	0.2
PARP1	0.299014	1.3	(1-1.7)	0.022
PANK2	0.629173	1.9	(1.3-2.7)	0.00076
PAK1	0.344522	1.4	(1.1-1.8)	0.008
PABPN1	0.596243	1.8	(1.3-2.5)	0.00024
PABPC1	0.396434	1.5	(1.2-1.9)	0.00094
P4HA1	0.0310069	1	(0.9-1.2)	0.67
P2RY13	0.0533815	1.1	(0.83-1.3)	0.66
P2RX4	0.365901	1.4	(1.2-1.8)	0.0015
OSTM1	0.338268	1.4	(1.1-1.7)	0.0016
OSGEP	0.447768	1.6	(1.1-2.3)	0.021
OPTN	0.494926	1.6	(1.2-2.2)	0.00078
OLR1	0.00318909	1	(0.84-1.2)	0.97
OLFML1	0.0923345	1.1	(0.92-1.3)	0.29
OGFR	0.386805	1.5	(1.1-2.1)	0.023
OCEL1	-0.267327	0.77	(0.58-1)	0.065
OAS1	0.143011	1.2	(0.96-1.4)	0.12
NXT1	0.434615	1.5	(1.2-2)	0.0022
NUPR1	0.157673	1.2	(1-1.4)	0.048
NUP93	0.56791	1.8	(1.3-2.3)	3.5e-05
NUP88	0.257823	1.3	(0.9-1.9)	0.17
NUP37	0.57825	1.8	(1.4-2.3)	2.5e-05
NUMB	0.0331517	1	(0.74-1.5)	0.85
NUMA1	0.171415	1.2	(0.9-1.6)	0.23
NUDT4	0.262908	1.3	(0.96-1.8)	0.087
NUDCD3	0.320184	1.4	(0.92-2.1)	0.12
NUCB1	0.178718	1.2	(0.88-1.6)	0.25
NT5E	0.155137	1.2	(1-1.4)	0.05
NSUN5	0.563671	1.8	(1.3-2.4)	0.00032
NSMCE4A	0.0996007	1.1	(0.78-1.6)	0.58
NRN1	-0.0679146	0.93	(0.75-1.2)	0.55
NRIP3	0.498955	1.6	(1.1-2.4)	0.011
NRBF2	0.183741	1.2	(0.9-1.6)	0.21
NRAS	0.523372	1.7	(1.3-2.2)	2.4e-05
NR3C1	0.0804479	1.1	(0.83-1.4)	0.56
NR2F1	0.173619	1.2	(1-1.4)	0.043
NR1H2	0.316644	1.4	(0.94-2)	0.099
NPC1	0.561664	1.8	(1.3-2.3)	4.8e-05
NOTCH1	0.180765	1.2	(0.95-1.5)	0.13
NOL8	0.402403	1.5	(1.1-2)	0.011
NOL3	0.129106	1.1	(0.94-1.4)	0.19
NOC2L	0.690923	2	(1.4-2.8)	4.4e-05
NNT	-0.110121	0.9	(0.74-1.1)	0.26
NMI	0.315035	1.4	(1.1-1.8)	0.018
NME6	0.852005	2.3	(1.6-3.4)	3.2e-06
NMB	0.143846	1.2	(0.97-1.4)	0.11
NLRP3	0.301821	1.4	(0.95-1.9)	0.09
NIPA2	0.22494	1.3	(0.94-1.7)	0.13
NGRN	0.134338	1.1	(0.85-1.5)	0.37
NGLY1	0.823872	2.3	(1.5-3.6)	0.00034
NGDN	0.406242	1.5	(1.1-2.1)	0.026
NFX1	0.166021	1.2	(0.81-1.7)	0.39
NFE2L3	0.264131	1.3	(1.1-1.6)	0.0066
NFATC3	0.189843	1.2	(0.87-1.7)	0.25
NEK9	0.140054	1.2	(0.81-1.6)	0.44
NEDD9	0.0910591	1.1	(0.92-1.3)	0.32
NECAP2	0.491693	1.6	(1.2-2.3)	0.0029
NDUFV2	-0.175072	0.84	(0.6-1.2)	0.31
NDUFV1	0.0959996	1.1	(0.79-1.5)	0.57
NDUFA4	-0.042425	0.96	(0.69-1.3)	0.8
NDRG3	0.511287	1.7	(1.3-2.1)	5.3e-05
NDRG1	0.30233	1.4	(1.2-1.6)	5.7e-05
NDEL1	0.0132831	1	(0.75-1.4)	0.93
NCR3	-0.23971	0.79	(0.55-1.1)	0.19
NCOR2	0.273953	1.3	(0.99-1.8)	0.062
NCOR1	-0.00181836	1	(0.77-1.3)	0.99
NCOA4	0.0721194	1.1	(0.84-1.4)	0.57
NCOA1	0.330756	1.4	(1-1.9)	0.051
NCLN	0.633737	1.9	(1.3-2.8)	0.0014
NCKAP1L	0.073312	1.1	(0.88-1.3)	0.49
NCF4	0.133225	1.1	(0.94-1.4)	0.19
NCF1	0.149475	1.2	(0.92-1.5)	0.21
NARF	0.399362	1.5	(1.2-1.9)	0.0017
NAPA	0.024591	1	(0.76-1.4)	0.87
NAGPA	0.358078	1.4	(1.1-1.9)	0.01
NADSYN1	0.46801	1.6	(1.2-2.2)	0.0021
NADK	0.0705452	1.1	(0.79-1.5)	0.66
MYO1F	0.0410289	1	(0.83-1.3)	0.73
MYO1B	-0.142932	0.87	(0.7-1.1)	0.18
MYL6B	0.335645	1.4	(1.1-1.7)	0.0013
MYD88	0.159156	1.2	(0.89-1.5)	0.26
MYCBP2	0.0788106	1.1	(0.82-1.4)	0.57
MXI1	-0.00866055	0.99	(0.75-1.3)	0.95
MX1	-0.0197561	0.98	(0.84-1.1)	0.79
MVP	0.162151	1.2	(0.95-1.5)	0.13
MTX2	0.491654	1.6	(1.2-2.2)	0.0021
MTMR3	0.272229	1.3	(0.9-1.9)	0.16
MTMR1	0.220125	1.2	(0.92-1.7)	0.16
MTHFS	-0.275838	0.76	(0.62-0.92)	0.0058
MTHFD2	0.1444	1.2	(0.99-1.4)	0.071
MTDH	0.266713	1.3	(1-1.7)	0.047
MTA1	0.43044	1.5	(1.1-2.1)	0.011
MT1X	-0.0624012	0.94	(0.86-1)	0.19
MT1G	-0.0111647	0.99	(0.92-1.1)	0.76
MT1F	-0.0332954	0.97	(0.87-1.1)	0.52
MT1E	-0.0324284	0.97	(0.89-1.1)	0.45
MSRA	-0.165933	0.85	(0.69-1)	0.12
MS4A6A	0.0486647	1	(0.89-1.2)	0.57
MRPS7	0.573187	1.8	(1.3-2.4)	0.00047
MRPS33	0.281291	1.3	(0.94-1.9)	0.11
MRPS22	0.435734	1.5	(0.99-2.4)	0.054
MRPS2	0.19217	1.2	(0.9-1.6)	0.21
MRPS18C	0.311322	1.4	(0.8-2.3)	0.25
MRPS18B	0.112458	1.1	(0.85-1.5)	0.43
MRPS12	0.237405	1.3	(0.96-1.7)	0.092
MRPL52	0.378382	1.5	(1.1-2)	0.012
MRPL49	0.397675	1.5	(1-2.1)	0.029
MRPL46	-0.139464	0.87	(0.65-1.2)	0.35
MRPL44	0.645079	1.9	(1.2-3)	0.0047
MRPL41	0.0466972	1	(0.8-1.4)	0.74
MRPL19	0.175291	1.2	(0.85-1.7)	0.32
MRPL18	0.46789	1.6	(1.2-2.2)	0.0044
MRPL16	0.296466	1.3	(0.86-2.1)	0.19
MRPL11	0.516661	1.7	(1.2-2.3)	0.001
MRFAP1L1	0.213203	1.2	(0.87-1.8)	0.23
MRC1	-0.0225447	0.98	(0.83-1.2)	0.79
MR1	0.157217	1.2	(0.88-1.6)	0.29
MPG	0.280404	1.3	(0.95-1.8)	0.095
MNAT1	0.489495	1.6	(1.1-2.4)	0.0088
MMRN1	0.182397	1.2	(0.97-1.5)	0.089
MMP25	-0.110499	0.9	(0.63-1.3)	0.54
MMP15	0.21792	1.2	(1-1.5)	0.042
MMP14	0.222458	1.2	(1.1-1.5)	0.0035
MLX	0.439064	1.6	(1.1-2.2)	0.019
MLLT11	0.0028865	1	(0.87-1.2)	0.97
MIF	0.00126191	1	(0.83-1.2)	0.99
MICALL2	0.21712	1.2	(1-1.5)	0.029
MICAL2	0.00513671	1	(0.79-1.3)	0.97
MIA3	-0.129739	0.88	(0.71-1.1)	0.23
MIA2	0.0303351	1	(0.82-1.3)	0.79
MGA	0.292594	1.3	(0.98-1.8)	0.068
MFSD5	0.569482	1.8	(1.3-2.4)	9.6e-05
MFAP4	-0.073223	0.93	(0.84-1)	0.18
MEF2D	0.203489	1.2	(0.92-1.6)	0.17
MED28	0.344639	1.4	(1.1-1.9)	0.014
ME2	0.45929	1.6	(1.2-2)	0.00047
ME1	0.234238	1.3	(1.1-1.4)	0.00067
MCTS1	0.407906	1.5	(1.1-2)	0.0046
MCRS1	0.63331	1.9	(1.3-2.7)	0.00049
MCM3AP	0.310711	1.4	(0.98-1.9)	0.065
MCM3	0.349562	1.4	(1.2-1.7)	0.0006
MCAM	0.192924	1.2	(1-1.5)	0.04
MBD1	0.477398	1.6	(1.1-2.3)	0.01
MAZ	0.314156	1.4	(1-1.8)	0.021
MAX	0.534055	1.7	(1.2-2.5)	0.0046
MAT2B	0.180258	1.2	(0.93-1.5)	0.16
MAST3	0.00709856	1	(0.79-1.3)	0.95
MAPKAPK3	0.338976	1.4	(1-2)	0.044
MAPK13	0.113291	1.1	(0.99-1.3)	0.081
MAP4K5	0.276277	1.3	(0.99-1.8)	0.06
MAP3K8	0.053559	1.1	(0.87-1.3)	0.58
MAP2K3	0.147815	1.2	(0.89-1.5)	0.27
MAP2K1	0.189895	1.2	(0.9-1.6)	0.2
MAOB	-0.102757	0.9	(0.75-1.1)	0.28
MAN2B1	0.104634	1.1	(0.86-1.4)	0.42
MAN1B1	0.683369	2	(1.4-2.7)	2.6e-05
MALT1	0.224279	1.3	(0.94-1.7)	0.12
MACF1	0.222556	1.2	(0.93-1.7)	0.14
LYZ	0.0138965	1	(0.93-1.1)	0.75
LYRM2	0.598458	1.8	(1.3-2.5)	0.00033
LY9	-0.193884	0.82	(0.57-1.2)	0.29
LY6E	0.0428071	1	(0.93-1.2)	0.45
LXN	0.00878708	1	(0.87-1.2)	0.91
LTBP3	0.0689055	1.1	(0.88-1.3)	0.49
LST1	0.0112049	1	(0.84-1.2)	0.91
LSM4	0.381133	1.5	(1.1-1.9)	0.0028
LSM12	0.571299	1.8	(1.3-2.4)	0.00042
LRRK1	0.153309	1.2	(0.85-1.6)	0.35
LRRC61	0.376507	1.5	(1.1-1.9)	0.0033
LRRC47	0.691235	2	(1.4-2.9)	0.00052
LRP10	0.46122	1.6	(1.3-2)	7.6e-05
LRCH3	0.52094	1.7	(1.3-2.2)	0.00019
LOXL2	0.219287	1.2	(1-1.5)	0.042
LOXL1	0.00888551	1	(0.86-1.2)	0.91
LONP2	-0.0539083	0.95	(0.77-1.2)	0.61
LONP1	0.556776	1.7	(1.2-2.5)	0.0017
LMO4	0.526681	1.7	(1.3-2.2)	4e-05
LMAN2	0.428269	1.5	(1.1-2.2)	0.026
LIPA	0.0998113	1.1	(0.89-1.4)	0.36
LIN7B	0.427307	1.5	(1.1-2.1)	0.0074
LIMD2	0.0224477	1	(0.85-1.2)	0.82
LILRA4	-0.213219	0.81	(0.51-1.3)	0.36
LIG1	0.294384	1.3	(1-1.7)	0.023
LGR4	0.0632555	1.1	(0.89-1.3)	0.5
LGALS9	0.189095	1.2	(1-1.4)	0.026
LGALS3BP	0.111016	1.1	(0.99-1.3)	0.066
LGALS2	0.0227035	1	(0.89-1.2)	0.75
LGALS1	0.220044	1.2	(1.1-1.5)	0.0082
LEPROTL1	0.386423	1.5	(1.1-1.9)	0.0028
LDHA	0.675822	2	(1.5-2.6)	5.5e-07
LBH	0.0204323	1	(0.86-1.2)	0.81
LAT	0.109679	1.1	(0.81-1.5)	0.5
LASP1	0.400991	1.5	(1.1-2)	0.0032
LARP7	0.315242	1.4	(0.91-2.1)	0.13
LARP1	0.401497	1.5	(1.1-2)	0.0089
LAP3	0.022096	1	(0.84-1.2)	0.83
LAMP3	0.100786	1.1	(0.91-1.3)	0.3
LAMC1	0.208474	1.2	(1-1.5)	0.019
LAIR2	0.0825124	1.1	(0.82-1.4)	0.56
LAGE3	0.417773	1.5	(1.2-1.9)	0.00035
LACTB2	0.101208	1.1	(0.9-1.4)	0.33
KYNU	0.179895	1.2	(1-1.4)	0.056
KRT81	0.0971276	1.1	(0.87-1.4)	0.41
KPNB1	0.545849	1.7	(1.3-2.3)	0.00018
KPNA5	0.370862	1.4	(1.1-2)	0.019
KPNA4	0.696602	2	(1.4-2.8)	7.9e-05
KMO	-0.104638	0.9	(0.78-1)	0.16
KLHL7	0.528052	1.7	(1.2-2.4)	0.0026
KLHL21	0.279868	1.3	(1-1.7)	0.021
KLHL18	0.844792	2.3	(1.5-3.5)	7.1e-05
KLHDC3	0.350343	1.4	(1.1-1.9)	0.014
KLF3	0.211941	1.2	(0.93-1.6)	0.15
KLF12	-0.0616459	0.94	(0.73-1.2)	0.64
KLF10	0.0404665	1	(0.87-1.2)	0.65
KIFC3	0.286714	1.3	(1-1.7)	0.026
KIFAP3	0.390047	1.5	(1.1-1.9)	0.0024
KIF1C	0.144527	1.2	(0.84-1.6)	0.37
KIF1B	0.268813	1.3	(1-1.7)	0.038
KIF13B	0.139112	1.1	(0.9-1.5)	0.27
KIAA1109	0.156377	1.2	(0.87-1.6)	0.3
KIAA0100	0.519717	1.7	(1.3-2.2)	0.00034
KIAA0040	0.0489	1.1	(0.85-1.3)	0.66
KEAP1	0.537891	1.7	(1.2-2.5)	0.0061
KCNQ1	0.0962399	1.1	(0.91-1.3)	0.33
KCNMB1	0.0418339	1	(0.76-1.4)	0.8
KCNMA1	-0.168394	0.85	(0.63-1.1)	0.27
JUND	-0.120266	0.89	(0.69-1.1)	0.33
JOSD1	0.364456	1.4	(1.1-1.9)	0.0053
JAM2	-0.329527	0.72	(0.55-0.94)	0.014
JAK2	0.104843	1.1	(0.83-1.5)	0.48
IVNS1ABP	0.322896	1.4	(1.1-1.7)	0.0041
IVD	-0.466614	0.63	(0.47-0.84)	0.002
ITSN2	0.31957	1.4	(1-1.9)	0.047
ITPR1	0.0716659	1.1	(0.81-1.4)	0.61
ITM2B	0.0570572	1.1	(0.77-1.4)	0.72
ITGB2	0.0992601	1.1	(0.94-1.3)	0.22
ITGB1	0.20022	1.2	(0.99-1.5)	0.06
ITGAM	0.232214	1.3	(1-1.5)	0.015
ITGAL	-0.0468371	0.95	(0.78-1.2)	0.64
ITGA5	0.328523	1.4	(1.1-1.7)	0.0017
ITGA4	0.0251133	1	(0.81-1.3)	0.84
ITGA2	0.226186	1.3	(1-1.5)	0.014
ITFG2	0.256668	1.3	(0.89-1.9)	0.18
ITFG1	0.122937	1.1	(0.89-1.4)	0.3
ISG20	-0.013067	0.99	(0.81-1.2)	0.89
ISCU	-0.069363	0.93	(0.64-1.4)	0.72
IRF2	0.184471	1.2	(0.9-1.6)	0.21
IRF1	0.054719	1.1	(0.86-1.3)	0.61
IRAK1	0.433818	1.5	(1.2-1.9)	0.00014
IQSEC1	0.0632599	1.1	(0.82-1.4)	0.64
INSIG2	0.0708833	1.1	(0.88-1.3)	0.5
INPP5D	-0.0421638	0.96	(0.76-1.2)	0.73
INPP4B	-0.293594	0.75	(0.52-1.1)	0.12
ING4	0.247261	1.3	(0.91-1.8)	0.16
IMMT	0.587645	1.8	(1.3-2.6)	0.0015
ILK	0.302098	1.4	(1-1.8)	0.032
ILF3	0.468038	1.6	(1.2-2.1)	0.0014
ILF2	0.504568	1.7	(1.3-2.1)	4.8e-05
IL21R	0.096503	1.1	(0.83-1.5)	0.51
IL1RN	-0.159414	0.85	(0.73-1)	0.044
IL18	0.120704	1.1	(0.97-1.3)	0.12
IL17RC	0.0689156	1.1	(0.8-1.4)	0.64
IL16	-0.102803	0.9	(0.67-1.2)	0.5
IL15RA	0.416726	1.5	(1.2-1.8)	3e-05
IL12RB1	0.0825695	1.1	(0.82-1.4)	0.56
IKZF1	-0.0897977	0.91	(0.7-1.2)	0.5
IGSF6	0.0697616	1.1	(0.89-1.3)	0.46
IFRD2	0.372897	1.5	(1-2)	0.025
IFITM1	-0.0503767	0.95	(0.83-1.1)	0.47
IFIT3	0.0559179	1.1	(0.88-1.3)	0.56
IFIT2	-0.0166376	0.98	(0.83-1.2)	0.85
IFIH1	0.0163975	1	(0.79-1.3)	0.9
IFI35	0.208543	1.2	(1-1.5)	0.052
IFI16	0.0232086	1	(0.87-1.2)	0.78
IER5	0.262468	1.3	(1.1-1.6)	0.0091
IER3	0.179703	1.2	(1.1-1.3)	0.0025
IDH3A	0.010134	1	(0.78-1.3)	0.94
IDH2	-0.103515	0.9	(0.72-1.1)	0.36
ID3	0.000249187	1	(0.84-1.2)	1
ID1	-0.0125198	0.99	(0.87-1.1)	0.85
ICAM1	0.161593	1.2	(1-1.4)	0.024
HTRA1	-0.0914384	0.91	(0.79-1.1)	0.21
HTATSF1	0.367199	1.4	(1.1-1.9)	0.011
HTATIP2	0.438246	1.5	(1.2-2)	0.00071
HSPH1	0.34742	1.4	(1.2-1.7)	0.00097
HSPG2	0.0204812	1	(0.87-1.2)	0.8
HSPE1	0.408136	1.5	(1.1-2)	0.0054
HSPD1	0.601505	1.8	(1.4-2.4)	3.4e-05
HSPB1	0.19139	1.2	(1-1.4)	0.036
HSPA8	0.461993	1.6	(1.2-2)	0.00024
HSPA6	0.173085	1.2	(1.1-1.3)	0.0024
HSPA1B	0.114409	1.1	(1-1.3)	0.055
HSD17B12	0.481521	1.6	(1.2-2.1)	0.00078
HSD11B1	-0.0431404	0.96	(0.89-1)	0.22
HPS1	0.288132	1.3	(0.97-1.8)	0.076
HOOK2	0.0889629	1.1	(0.87-1.4)	0.44
HOMER3	0.289419	1.3	(1.1-1.6)	0.00087
HMGN3	0.186323	1.2	(0.94-1.6)	0.15
HMGN2	0.363161	1.4	(1.1-1.9)	0.0064
HMG20B	0.350793	1.4	(0.98-2.1)	0.066
HMG20A	0.0502392	1.1	(0.81-1.4)	0.7
HLA_F	-0.0523982	0.95	(0.8-1.1)	0.54
HLA_E	-0.119732	0.89	(0.69-1.1)	0.34
HLA_DRB1	-0.0697429	0.93	(0.81-1.1)	0.33
HLA_DRA	-0.0487748	0.95	(0.84-1.1)	0.47
HLA_DQA1	-0.0125939	0.99	(0.87-1.1)	0.85
HLA_DPB1	-0.0616514	0.94	(0.81-1.1)	0.42
HLA_DPA1	-0.021996	0.98	(0.85-1.1)	0.76
HLA_DOA	-0.000562727	1	(0.84-1.2)	0.99
HLA_DMB	0.0166946	1	(0.87-1.2)	0.84
HLA_DMA	-0.0371599	0.96	(0.84-1.1)	0.6
HLA_C	-0.0279396	0.97	(0.8-1.2)	0.77
HLA_B	-0.0683335	0.93	(0.8-1.1)	0.39
HLA_A	-0.00615696	0.99	(0.81-1.2)	0.95
HK2	0.244993	1.3	(1.1-1.5)	0.00081
HIVEP3	0.467844	1.6	(1.2-2.2)	0.0025
HIP1R	0.207445	1.2	(0.97-1.6)	0.082
HIGD2A	0.541611	1.7	(1.2-2.5)	0.0035
HIGD1A	0.0200724	1	(0.79-1.3)	0.88
HIF1A	0.234237	1.3	(1.1-1.5)	0.0062
HGSNAT	-0.00529771	0.99	(0.8-1.2)	0.96
HERC4	0.290327	1.3	(0.92-1.9)	0.12
HDAC9	0.193057	1.2	(0.9-1.6)	0.2
HCK	0.142853	1.2	(0.95-1.4)	0.14
HCG18	0.344995	1.4	(1.1-1.9)	0.019
HCFC1R1	0.223844	1.3	(0.98-1.6)	0.067
HBEGF	0.303847	1.4	(1.1-1.7)	0.0068
HAX1	0.554623	1.7	(1.3-2.4)	0.00067
GYS1	0.354473	1.4	(1.1-1.8)	0.0043
GTF3C2	0.740335	2.1	(1.5-2.9)	1.2e-05
GTF3C1	0.565413	1.8	(1.3-2.5)	0.00084
GTF2I	0.0719663	1.1	(0.89-1.3)	0.44
GTF2F1	0.401272	1.5	(1-2.2)	0.035
GSTP1	0.0374455	1	(0.91-1.2)	0.57
GSTK1	-0.0482214	0.95	(0.71-1.3)	0.74
GRWD1	0.584968	1.8	(1.2-2.6)	0.0025
GRN	0.385837	1.5	(1.2-1.9)	0.0012
GRINA	0.223596	1.3	(0.97-1.6)	0.09
GRB10	0.143054	1.2	(0.85-1.6)	0.35
GRAP2	-0.0977429	0.91	(0.68-1.2)	0.5
GPX7	0.198569	1.2	(1.1-1.4)	0.0073
GPSM3	0.0392464	1	(0.85-1.3)	0.71
GPI	0.176011	1.2	(0.93-1.5)	0.16
GPATCH4	0.609489	1.8	(1.4-2.4)	1.8e-05
GOT2	-0.415698	0.66	(0.53-0.82)	0.00013
GOLGA4	0.193208	1.2	(0.93-1.6)	0.15
GNPAT	0.281592	1.3	(0.99-1.8)	0.055
GNL3	0.473523	1.6	(1.2-2.1)	0.00068
GMEB1	0.788205	2.2	(1.5-3.2)	7.1e-05
GJA1	0.0908252	1.1	(0.93-1.3)	0.26
GIMAP6	-0.158426	0.85	(0.69-1.1)	0.16
GIMAP5	-0.138426	0.87	(0.64-1.2)	0.37
GIMAP4	0.000368227	1	(0.81-1.2)	1
GHITM	0.0260359	1	(0.74-1.4)	0.87
GEM	0.0159219	1	(0.9-1.1)	0.79
GDI2	0.813179	2.3	(1.6-3.2)	4.5e-06
GCSH	0.184272	1.2	(0.92-1.6)	0.17
GCNT1	0.261634	1.3	(1-1.6)	0.023
GBP2	0.105595	1.1	(0.92-1.3)	0.26
GBP1	-0.00767443	0.99	(0.85-1.2)	0.93
GBF1	0.262907	1.3	(0.95-1.8)	0.099
GAPDH	0.527713	1.7	(1.3-2.2)	2.4e-05
GAN	1.18637	3.3	(1.9-5.8)	4.6e-05
GADD45G	-0.186809	0.83	(0.73-0.95)	0.0051
GABARAPL1	-0.240512	0.79	(0.65-0.95)	0.012
G6PD	0.403249	1.5	(1.3-1.7)	1.2e-09
G0S2	-0.0262884	0.97	(0.88-1.1)	0.62
FZR1	0.156219	1.2	(0.83-1.6)	0.37
FUBP1	0.527417	1.7	(1.3-2.2)	3.9e-05
FTSJ3	0.713124	2	(1.5-2.8)	1.5e-05
FSCN1	0.281223	1.3	(1.1-1.6)	0.0021
FRZB	-0.0629122	0.94	(0.79-1.1)	0.48
FRG1	0.256012	1.3	(0.92-1.8)	0.14
FOSL2	0.157807	1.2	(0.97-1.4)	0.11
FOSL1	0.0483922	1	(0.86-1.3)	0.63
FMO2	-0.273697	0.76	(0.6-0.97)	0.028
FMO1	0.0394363	1	(0.91-1.2)	0.55
FLT4	-0.153657	0.86	(0.65-1.1)	0.28
FLT3LG	0.0457759	1	(0.77-1.4)	0.77
FLT1	0.045208	1	(0.82-1.3)	0.72
FLOT1	0.469506	1.6	(1.2-2.2)	0.0027
FLNB	0.214051	1.2	(0.93-1.7)	0.15
FLII	0.352625	1.4	(1.1-1.9)	0.019
FLI1	-0.0459524	0.96	(0.72-1.3)	0.76
FKBP4	0.435096	1.5	(1.2-2)	0.00085
FIP1L1	0.451144	1.6	(1.2-2.1)	0.0029
FILIP1L	-0.070667	0.93	(0.79-1.1)	0.41
FHOD1	0.164639	1.2	(0.94-1.5)	0.15
FGL2	-0.033193	0.97	(0.81-1.2)	0.72
FGD2	0.131264	1.1	(0.87-1.5)	0.33
FCHSD2	0.205307	1.2	(0.92-1.6)	0.16
FCGRT	-0.0770048	0.93	(0.7-1.2)	0.58
FCGR3B	0.179669	1.2	(1-1.4)	0.043
FCGR3A	0.111361	1.1	(0.96-1.3)	0.16
FCGR2A	0.215249	1.2	(1-1.5)	0.015
FBXO7	0.0757114	1.1	(0.79-1.5)	0.64
FBXO3	0.178191	1.2	(0.91-1.6)	0.21
FBXO21	0.0957606	1.1	(0.86-1.4)	0.45
FAS	-0.155888	0.86	(0.7-1)	0.13
FARS2	0.181673	1.2	(0.83-1.7)	0.33
FAP	0.112362	1.1	(0.94-1.3)	0.21
FAM32A	0.40885	1.5	(1-2.2)	0.043
FAM111A	0.268676	1.3	(1-1.7)	0.037
FAH	-0.129894	0.88	(0.71-1.1)	0.24
F8	-0.0357536	0.96	(0.77-1.2)	0.75
EXOSC10	0.628365	1.9	(1.4-2.6)	0.00013
EXOC7	0.270545	1.3	(0.95-1.8)	0.1
EVL	0.107829	1.1	(0.91-1.4)	0.29
ETV7	-0.00215152	1	(0.84-1.2)	0.98
ETS2	-0.156304	0.86	(0.71-1)	0.1
ETS1	-0.112626	0.89	(0.72-1.1)	0.29
ERP29	0.624849	1.9	(1.3-2.6)	0.00023
ERICH1	0.447243	1.6	(1.1-2.2)	0.008
ERCC5	0.279542	1.3	(0.95-1.8)	0.093
ERAL1	0.609547	1.8	(1.3-2.6)	0.00078
EPS15L1	0.332996	1.4	(1-1.9)	0.047
EPN1	0.392599	1.5	(1-2.1)	0.035
EPHX1	-0.069795	0.93	(0.82-1.1)	0.3
EPHA2	0.104258	1.1	(0.93-1.3)	0.25
EPAS1	-0.0730345	0.93	(0.72-1.2)	0.57
EP400	0.473552	1.6	(1.2-2.2)	0.0034
ENTPD4	0.153319	1.2	(0.9-1.5)	0.25
ENPP2	0.130668	1.1	(1-1.3)	0.036
ENO3	-0.0502498	0.95	(0.83-1.1)	0.47
ENO2	0.203303	1.2	(1.1-1.4)	0.0031
ENO1	0.514878	1.7	(1.4-2)	5.9e-08
EMP3	0.131484	1.1	(0.98-1.3)	0.098
EMP1	-0.101682	0.9	(0.77-1.1)	0.19
EML3	0.282791	1.3	(0.96-1.8)	0.085
EMD	0.282497	1.3	(0.97-1.8)	0.079
ELOVL1	0.700663	2	(1.5-2.7)	1.2e-06
ELK4	0.0783336	1.1	(0.82-1.4)	0.59
ELF4	0.243129	1.3	(1.1-1.5)	0.0093
ELF2	0.226323	1.3	(0.88-1.8)	0.21
EIF4H	0.306484	1.4	(0.96-1.9)	0.086
EIF4G1	0.463179	1.6	(1.1-2.2)	0.0087
EIF4EBP1	0.306594	1.4	(1.1-1.7)	0.0023
EIF4E	0.647503	1.9	(1.4-2.7)	0.0002
EIF2S1	0.793408	2.2	(1.5-3.2)	5.3e-05
EID1	0.0578553	1.1	(0.82-1.4)	0.66
EHD4	-0.0655685	0.94	(0.7-1.3)	0.66
EGFL7	0.00658019	1	(0.83-1.2)	0.95
EFHD2	0.169235	1.2	(0.91-1.5)	0.21
EEF2	0.167503	1.2	(0.87-1.6)	0.29
EEF1A1	0.259371	1.3	(1-1.7)	0.038
EDEM1	-0.0292612	0.97	(0.75-1.3)	0.82
ECSIT	0.0411812	1	(0.74-1.5)	0.81
ECM1	0.0503724	1.1	(0.89-1.2)	0.56
EBP	0.0985852	1.1	(0.89-1.4)	0.37
DYSF	-0.0492638	0.95	(0.74-1.2)	0.7
DYRK2	0.400822	1.5	(1.2-1.9)	0.0011
DYNLT1	0.589044	1.8	(1.3-2.4)	0.00012
DYNC1LI1	0.917724	2.5	(1.8-3.4)	1.3e-08
DYNC1I2	0.33729	1.4	(1.1-1.8)	0.0074
DVL2	0.462582	1.6	(1.2-2.1)	0.0018
DTX2	0.507185	1.7	(1.2-2.3)	0.0014
DSC2	0.286215	1.3	(1-1.7)	0.019
DRG2	0.25094	1.3	(0.89-1.9)	0.18
DR1	0.583513	1.8	(1.4-2.3)	2.2e-05
DPAGT1	0.545866	1.7	(1.3-2.4)	0.00079
DOT1L	0.460968	1.6	(1.2-2.1)	0.0029
DOK3	0.234455	1.3	(0.99-1.6)	0.06
DOK2	0.0881583	1.1	(0.89-1.3)	0.4
DNPEP	0.653074	1.9	(1.2-3)	0.0054
DNASE2	0.131921	1.1	(0.88-1.5)	0.32
DNASE1L3	-0.276235	0.76	(0.67-0.87)	3.9e-05
DNAJC8	0.757517	2.1	(1.5-3)	2e-05
DNAJB4	0.381262	1.5	(1.2-1.8)	0.0002
DNAJB12	0.516029	1.7	(1-2.7)	0.039
DNAJB1	0.0887768	1.1	(0.91-1.3)	0.35
DNAJA3	0.153936	1.2	(0.83-1.6)	0.37
DNAJA1	0.212077	1.2	(0.95-1.6)	0.12
DLST	0.139735	1.1	(0.8-1.6)	0.44
DIDO1	0.295353	1.3	(1-1.8)	0.05
DIAPH1	-0.00763229	0.99	(0.75-1.3)	0.96
DHX32	0.294239	1.3	(1.1-1.7)	0.015
DHX15	0.403017	1.5	(1.1-2)	0.0062
DHTKD1	-0.0833913	0.92	(0.77-1.1)	0.35
DGKZ	0.543966	1.7	(1.3-2.3)	0.00027
DGKA	0.0240534	1	(0.83-1.3)	0.83
DENR	0.707202	2	(1.5-2.8)	9.6e-06
DENND4C	0.168877	1.2	(0.92-1.5)	0.18
DENND4B	0.396718	1.5	(1.1-1.9)	0.0032
DENND3	0.194063	1.2	(0.93-1.6)	0.15
DENND2D	0.0611804	1.1	(0.87-1.3)	0.54
DENND1C	-0.112498	0.89	(0.71-1.1)	0.33
DENND1A	0.198841	1.2	(0.84-1.8)	0.29
DECR1	-0.139307	0.87	(0.67-1.1)	0.31
DDX54	0.604363	1.8	(1.3-2.7)	0.0018
DDX52	0.637173	1.9	(1.3-2.7)	0.00043
DDX50	0.519762	1.7	(1.2-2.3)	0.0011
DDX41	0.619858	1.9	(1.3-2.6)	0.00055
DDX27	0.678764	2	(1.4-2.7)	4.2e-05
DDX17	0.151127	1.2	(0.93-1.5)	0.19
DDOST	0.50598	1.7	(1.3-2.2)	0.00039
DDIT4	0.0989758	1.1	(0.97-1.3)	0.14
DDIT3	0.263531	1.3	(1.1-1.6)	0.0058
DDAH2	0.242512	1.3	(1-1.6)	0.024
DCXR	-0.12201	0.89	(0.78-1)	0.062
DCTN6	0.370315	1.4	(1.1-1.9)	0.012
DCTN2	0.690558	2	(1.4-2.8)	3.4e-05
DCTN1	0.549298	1.7	(1.2-2.5)	0.0025
DCPS	0.0740024	1.1	(0.92-1.3)	0.37
DCP1A	0.502727	1.7	(1.2-2.3)	0.0024
DCLRE1C	0.51394	1.7	(1.3-2.2)	0.00035
DAPP1	-0.00694831	0.99	(0.76-1.3)	0.96
DAP3	0.579713	1.8	(1.3-2.5)	0.00039
CYP7B1	0.0226277	1	(0.86-1.2)	0.8
CYP27A1	-0.189061	0.83	(0.73-0.94)	0.0046
CYBB	0.154687	1.2	(1-1.4)	0.054
CYB5A	-0.128865	0.88	(0.74-1)	0.15
CXCR4	0.0592592	1.1	(0.92-1.2)	0.4
CXCL9	-0.0482138	0.95	(0.86-1.1)	0.34
CXCL5	0.16681	1.2	(1.1-1.3)	0.0018
CXCL11	0.020267	1	(0.88-1.2)	0.79
CXCL10	-0.0211923	0.98	(0.89-1.1)	0.68
CUTA	0.300285	1.4	(1-1.8)	0.042
CUL5	0.282288	1.3	(0.94-1.9)	0.11
CUL1	0.501528	1.7	(1.2-2.3)	0.0051
CTSW	-0.0694138	0.93	(0.77-1.1)	0.47
CTSS	0.0416815	1	(0.89-1.2)	0.61
CTSO	-0.1767	0.84	(0.7-1)	0.048
CTSD	0.237811	1.3	(1-1.6)	0.051
CTSC	0.259507	1.3	(1.1-1.5)	0.00027
CTR9	0.127292	1.1	(0.89-1.4)	0.3
CTNNA1	0.539794	1.7	(1.2-2.4)	0.0019
CTDSP1	0.331463	1.4	(0.95-2)	0.09
CSTB	0.445463	1.6	(1.2-2)	0.00016
CSNK1G3	0.492028	1.6	(1.1-2.4)	0.0085
CSNK1E	0.433058	1.5	(1.2-2)	0.00079
CSK	0.231449	1.3	(0.9-1.8)	0.18
CRYZ	0.0940522	1.1	(0.91-1.3)	0.33
CRTAP	0.218826	1.2	(0.97-1.6)	0.087
CRLF3	0.288644	1.3	(1-1.7)	0.035
CREM	0.250655	1.3	(0.96-1.7)	0.096
CRBN	0.0885876	1.1	(0.76-1.6)	0.64
CRAT	-0.18934	0.83	(0.62-1.1)	0.2
CPVL	0.186843	1.2	(1-1.4)	0.019
CPNE3	0.107841	1.1	(0.88-1.4)	0.36
COX7C	0.136456	1.1	(0.8-1.6)	0.45
COX6A1	0.103003	1.1	(0.77-1.6)	0.58
COX4I1	0.00465366	1	(0.73-1.4)	0.98
CORO1B	0.373732	1.5	(1.1-2)	0.024
COPS5	0.480068	1.6	(1.2-2.2)	0.003
COPS4	0.383897	1.5	(1.1-2)	0.017
COMMD8	0.46821	1.6	(1.3-2)	0.00013
COMMD10	0.318712	1.4	(1-1.8)	0.021
COMMD1	0.333059	1.4	(0.87-2.2)	0.17
COL4A2	0.129258	1.1	(0.98-1.3)	0.086
COL4A1	0.087975	1.1	(0.95-1.3)	0.23
COL18A1	-0.225036	0.8	(0.65-0.98)	0.028
CNR2	-0.701369	0.5	(0.18-1.4)	0.19
CNN2	0.130565	1.1	(0.91-1.4)	0.25
CMTM6	0.2198	1.2	(0.98-1.6)	0.078
CMKLR1	0.0286496	1	(0.8-1.3)	0.83
CLU	-0.0949276	0.91	(0.76-1.1)	0.29
CLTA	0.737475	2.1	(1.5-2.9)	1.5e-05
CLSTN3	0.137227	1.1	(0.85-1.5)	0.37
CLSTN1	0.23695	1.3	(1.1-1.5)	0.0081
CLNS1A	0.283291	1.3	(0.98-1.8)	0.066
CLIC2	0.13254	1.1	(0.92-1.4)	0.23
CLEC5A	0.449264	1.6	(1.2-2)	0.00021
CLEC10A	-0.0493313	0.95	(0.77-1.2)	0.64
CLDN1	0.050219	1.1	(0.89-1.2)	0.55
CLCN7	0.354385	1.4	(1.1-1.9)	0.016
CKLF	0.477617	1.6	(1.3-2)	1.7e-05
CKAP2	0.409787	1.5	(1.2-1.8)	8.3e-05
CIITA	-0.0392713	0.96	(0.75-1.2)	0.75
CHSY1	0.0475556	1	(0.87-1.3)	0.62
CHMP7	0.373272	1.5	(1-2.1)	0.04
CHMP5	0.361339	1.4	(1.1-1.9)	0.018
CGRRF1	0.529205	1.7	(1.2-2.4)	0.0028
CFD	0.0713157	1.1	(0.91-1.3)	0.39
CEP68	0.392392	1.5	(1-2.1)	0.026
CEP57	0.13843	1.1	(0.9-1.5)	0.27
CEP170	0.375573	1.5	(1.1-1.8)	0.002
CENPF	0.359765	1.4	(1.2-1.7)	6.4e-05
CEBPZ	0.67565	2	(1.4-2.8)	0.00032
CDKN2D	0.503907	1.7	(1.3-2.2)	0.00021
CDKN1B	0.176149	1.2	(0.92-1.5)	0.19
CDKN1A	0.0285614	1	(0.87-1.2)	0.73
CDIPT	0.282115	1.3	(0.95-1.9)	0.098
CDC73	0.428536	1.5	(1.1-2.1)	0.0061
CDC42SE1	0.260753	1.3	(1-1.6)	0.024
CDC25B	0.425793	1.5	(1.3-1.9)	1.6e-05
CDC14B	-0.193516	0.82	(0.66-1)	0.079
CD93	0.109815	1.1	(0.92-1.3)	0.25
CD9	0.0728088	1.1	(0.92-1.3)	0.37
CD86	0.122466	1.1	(0.92-1.4)	0.25
CD83	0.222696	1.2	(1-1.5)	0.036
CD82	0.000346825	1	(0.79-1.3)	1
CD74	-0.0455629	0.96	(0.82-1.1)	0.56
CD48	-0.0914719	0.91	(0.77-1.1)	0.28
CD47	0.183433	1.2	(0.94-1.5)	0.14
CD44	0.14532	1.2	(1-1.3)	0.056
CD3G	-0.0723257	0.93	(0.71-1.2)	0.59
CD38	0.0297405	1	(0.85-1.2)	0.76
CD37	-0.0440587	0.96	(0.79-1.2)	0.65
CD19	-0.0922827	0.91	(0.71-1.2)	0.48
CCPG1	-0.153295	0.86	(0.63-1.2)	0.32
CCNL2	0.00575658	1	(0.81-1.2)	0.96
CCND2	-0.0153087	0.98	(0.8-1.2)	0.88
CCND1	-0.00986532	0.99	(0.85-1.2)	0.9
CCL3	0.0662644	1.1	(0.9-1.3)	0.46
CCL21	-0.0670049	0.94	(0.86-1)	0.13
CCL20	0.113038	1.1	(1-1.2)	0.0066
CCL2	-0.0314575	0.97	(0.86-1.1)	0.6
CCL19	-0.0610425	0.94	(0.86-1)	0.16
CCDC28A	-0.00853615	0.99	(0.75-1.3)	0.95
CCDC22	0.641063	1.9	(1.3-2.8)	0.0012
CCDC14	0.265979	1.3	(1-1.7)	0.035
CCDC130	0.256976	1.3	(0.93-1.8)	0.12
CBR1	-0.0180448	0.98	(0.83-1.2)	0.83
CBL	0.434903	1.5	(1.1-2.1)	0.0042
CBFA2T3	-0.378977	0.68	(0.48-0.97)	0.035
CAT	-0.163985	0.85	(0.71-1)	0.074
CAST	0.0980153	1.1	(0.82-1.5)	0.51
CASP8	0.429474	1.5	(1.1-2.1)	0.0037
CASP5	0.452655	1.6	(1-2.4)	0.036
CASP4	0.215438	1.2	(0.97-1.6)	0.09
CASP3	0.264252	1.3	(0.97-1.8)	0.082
CASP1	0.143486	1.2	(0.94-1.4)	0.18
CASD1	0.227367	1.3	(0.95-1.7)	0.1
CARD9	0.565817	1.8	(1.3-2.4)	0.00025
CAPZB	0.617322	1.9	(1.3-2.6)	0.00066
CAMK2D	0.196177	1.2	(0.87-1.7)	0.25
CALM2	0.50706	1.7	(1.2-2.3)	0.0012
CALCOCO2	0.162557	1.2	(0.85-1.6)	0.33
CABIN1	0.282572	1.3	(1-1.8)	0.053
CA2	-0.00600815	0.99	(0.87-1.1)	0.93
C8orf33	0.407565	1.5	(1.2-1.9)	0.00075
C2	-0.118128	0.89	(0.75-1)	0.16
C1S	-0.228569	0.8	(0.67-0.94)	0.0066
C1QB	0.0604515	1.1	(0.93-1.2)	0.39
C1QA	0.0326351	1	(0.89-1.2)	0.66
C1orf54	0.091859	1.1	(0.87-1.4)	0.43
C1orf21	0.218379	1.2	(1-1.6)	0.054
BTN3A3	-0.173366	0.84	(0.68-1)	0.11
BTN3A2	-0.0164295	0.98	(0.79-1.2)	0.88
BTN3A1	-0.0531109	0.95	(0.76-1.2)	0.63
BTN2A2	0.126528	1.1	(0.87-1.5)	0.34
BTN2A1	0.295576	1.3	(1-1.8)	0.032
BTK	0.110962	1.1	(0.88-1.4)	0.37
BST2	0.0320527	1	(0.9-1.2)	0.65
BRD3	0.257273	1.3	(1-1.7)	0.044
BNIP3L	0.305693	1.4	(1.1-1.7)	0.0055
BNIP3	0.161362	1.2	(0.91-1.5)	0.22
BLVRA	0.184265	1.2	(1-1.4)	0.039
BLCAP	-0.0168504	0.98	(0.73-1.3)	0.91
BIRC5	0.371318	1.4	(1.2-1.7)	3.1e-06
BIN2	-0.0441863	0.96	(0.76-1.2)	0.7
BICD1	0.651715	1.9	(1.4-2.6)	2.3e-05
BECN1	0.212175	1.2	(0.94-1.6)	0.14
BDKRB2	-0.0636697	0.94	(0.77-1.1)	0.52
BCOR	0.459007	1.6	(1.2-2.1)	0.00053
BCKDK	-0.0465931	0.95	(0.71-1.3)	0.76
BCAT1	0.41409	1.5	(1.3-1.8)	2.1e-05
BCAP29	0.63407	1.9	(1.3-2.8)	0.0014
B3GNT2	0.197223	1.2	(0.94-1.6)	0.13
B3GALT4	-0.098727	0.91	(0.72-1.1)	0.4
B2M	-0.117026	0.89	(0.71-1.1)	0.31
AXL	0.102522	1.1	(0.9-1.4)	0.34
AUP1	0.686034	2	(1.4-2.8)	0.00017
ATXN3	0.382994	1.5	(0.86-2.5)	0.16
ATXN1	0.238921	1.3	(0.94-1.7)	0.12
ATP8A1	-0.071851	0.93	(0.69-1.2)	0.63
ATP6V0B	0.631723	1.9	(1.4-2.5)	7e-06
ATP6AP2	0.49026	1.6	(1.2-2.3)	0.0031
ATP13A3	0.0373397	1	(0.81-1.3)	0.76
ATP13A2	0.557186	1.7	(1.4-2.2)	7.6e-06
ATM	0.192913	1.2	(0.92-1.6)	0.17
ATG3	0.765203	2.1	(1.5-3.2)	9.1e-05
ATG12	0.668056	2	(1.3-3)	0.0022
ATF4	0.472701	1.6	(1.2-2.2)	0.0021
ATF2	0.357969	1.4	(1.1-1.9)	0.008
ATAD3A	0.586007	1.8	(1.4-2.4)	2.2e-05
ASXL2	0.175302	1.2	(0.95-1.5)	0.13
ASPSCR1	0.0253572	1	(0.84-1.3)	0.81
ASPH	0.230267	1.3	(1.1-1.5)	0.0097
ASF1A	0.695869	2	(1.5-2.7)	9.8e-06
ASCL2	0.211555	1.2	(0.94-1.6)	0.13
ASCC3	0.209469	1.2	(1-1.5)	0.054
ASCC2	0.551978	1.7	(1.2-2.5)	0.0033
ART4	-0.0354726	0.97	(0.82-1.1)	0.68
ARSB	0.247572	1.3	(0.96-1.7)	0.096
ARMCX6	0.235601	1.3	(1.1-1.5)	0.003
ARMC8	0.573726	1.8	(1.2-2.6)	0.0027
ARMC1	0.350701	1.4	(1.1-1.9)	0.011
ARL6IP5	0.185146	1.2	(0.94-1.5)	0.15
ARL4D	0.0255452	1	(0.86-1.2)	0.78
ARL4A	0.180623	1.2	(0.99-1.4)	0.063
ARL2BP	0.117105	1.1	(0.86-1.5)	0.38
ARID5A	0.125084	1.1	(0.89-1.4)	0.32
ARHGEF6	-0.0473565	0.95	(0.76-1.2)	0.69
ARHGEF3	-0.048343	0.95	(0.79-1.1)	0.6
ARHGDIB	0.0149896	1	(0.83-1.2)	0.88
ARHGAP25	0.0150839	1	(0.79-1.3)	0.91
ARHGAP17	0.446549	1.6	(1.1-2.2)	0.0073
ARHGAP1	0.53629	1.7	(1.3-2.3)	0.00051
ARFGAP3	0.312952	1.4	(1.1-1.8)	0.014
ARFGAP1	0.513901	1.7	(1.3-2.2)	0.0005
ARCN1	0.443086	1.6	(1.1-2.1)	0.0049
APOL6	-0.115369	0.89	(0.72-1.1)	0.29
APOL3	-0.0841223	0.92	(0.79-1.1)	0.28
APOL2	0.176752	1.2	(0.92-1.5)	0.18
APOL1	-0.0748934	0.93	(0.76-1.1)	0.46
APOE	-0.17133	0.84	(0.73-0.98)	0.025
APOBEC3G	-0.00709006	0.99	(0.8-1.2)	0.95
APOBEC3C	0.041781	1	(0.88-1.2)	0.64
APLP2	0.452032	1.6	(1.2-2.1)	0.0029
API5	0.522503	1.7	(1.1-2.5)	0.011
APEX1	0.634671	1.9	(1.3-2.7)	0.00048
APBB1IP	0.148867	1.2	(0.97-1.4)	0.098
AP2B1	0.467737	1.6	(1.2-2.1)	0.00038
AP1S1	0.298205	1.3	(1-1.8)	0.049
AOAH	0.035194	1	(0.84-1.3)	0.75
ANXA7	0.0868105	1.1	(0.79-1.5)	0.6
ANPEP	-0.085755	0.92	(0.79-1.1)	0.25
ANKRD28	0.0976203	1.1	(0.82-1.5)	0.51
ANKRD12	0.0640568	1.1	(0.8-1.4)	0.66
ANKRD11	0.392351	1.5	(1.1-1.9)	0.0048
ANKH	0.191486	1.2	(0.92-1.6)	0.18
ANGPTL4	-0.0908138	0.91	(0.81-1)	0.15
ANGPT1	0.324995	1.4	(1.1-1.8)	0.011
ANAPC1	0.622299	1.9	(1.3-2.6)	0.00025
ALOX5AP	0.104096	1.1	(0.96-1.3)	0.16
ALG3	0.677544	2	(1.4-2.7)	5.5e-05
ALG12	0.227229	1.3	(0.95-1.7)	0.11
ALDOC	0.0348438	1	(0.91-1.2)	0.6
ALDOA	0.361018	1.4	(1.2-1.7)	1.6e-05
ALDH2	-0.351745	0.7	(0.58-0.85)	0.00027
ALDH1A1	-0.0622883	0.94	(0.82-1.1)	0.36
AKR1C2	0.0613675	1.1	(0.95-1.2)	0.3
AKR1A1	0.245385	1.3	(0.98-1.7)	0.072
AKAP13	-0.132191	0.88	(0.67-1.1)	0.34
AKAP10	0.46946	1.6	(1.2-2.2)	0.0024
AIM2	0.0675341	1.1	(0.85-1.3)	0.56
AHCY	0.269745	1.3	(1-1.7)	0.031
AGPAT4	0.318177	1.4	(1.1-1.8)	0.01
AGPAT3	0.0487012	1	(0.79-1.4)	0.74
ADSL	0.688489	2	(1.5-2.6)	1.8e-06
ADPGK	0.125584	1.1	(0.83-1.6)	0.44
ADNP	0.402227	1.5	(1.1-1.9)	0.0028
ADM	0.224099	1.3	(1.1-1.4)	0.0019
ADI1	-0.265416	0.77	(0.63-0.94)	0.0093
ADCY3	0.125967	1.1	(0.9-1.4)	0.29
ADARB1	-0.04628	0.95	(0.67-1.4)	0.8
ADAR	0.365903	1.4	(1.1-1.9)	0.011
ADAMTS7	0.432633	1.5	(1.1-2.2)	0.013
ADAM8	0.0514024	1.1	(0.83-1.3)	0.67
ACTN4	0.289487	1.3	(1-1.8)	0.041
ACTG1	0.440036	1.6	(1.2-2)	0.00064
ACP2	0.369382	1.4	(1.1-1.9)	0.013
ACOT7	0.519316	1.7	(1.3-2.2)	0.0001
ACO2	0.140192	1.2	(0.91-1.5)	0.24
ABT1	0.26357	1.3	(0.95-1.8)	0.1
ABL1	0.288099	1.3	(1-1.7)	0.026
ABHD6	-0.0537016	0.95	(0.76-1.2)	0.63
ABCE1	0.462691	1.6	(1.2-2.1)	0.002
ABCB7	0.300262	1.4	(0.96-1.9)	0.082
AATF	0.560172	1.8	(1.3-2.4)	0.0003
AASDHPPT	0.260166	1.3	(0.97-1.7)	0.08
AAK1	0.383857	1.5	(1-2.1)	0.032

## Sheet: Table S3
Table S3 Differentially expressed genes identified by Boruta analysis
gene	meanImp	medianImp	minImp	maxImp	normHits	decision
TTC1	5.02938	5.00271	2.0439	8.82497	0.722723	Confirmed
STK25	4.52368	4.51575	1.26937	7.52754	0.626627	Confirmed
SPP1	4.64763	4.63814	0.751359	8.11862	0.650651	Confirmed
SOX11	7.28155	7.2765	3.74725	11.1872	0.906907	Confirmed
SNAPC2	7.48667	7.49271	4.01266	10.7815	0.923924	Confirmed
SFN	6.57136	6.5729	2.92915	10.4787	0.878879	Confirmed
SF3B4	5.47757	5.51789	1.57886	8.6374	0.767768	Confirmed
SAP30	8.35904	8.36726	4.76561	12.6956	0.950951	Confirmed
S100A9	10.5636	10.6208	7.08228	14.3245	0.991992	Confirmed
PPM1G	8.29728	8.25087	5.1389	12.4468	0.951952	Confirmed
PANK2	5.82626	5.78183	2.01802	9.14289	0.81982	Confirmed
ITGA5	6.74373	6.70185	3.41066	10.0428	0.892893	Confirmed
IL15RA	5.53203	5.52404	1.63652	8.93692	0.783784	Confirmed
GRWD1	4.33267	4.34554	0.640264	8.41286	0.57958	Confirmed
G6PD	5.90185	5.925	2.57427	9.6618	0.807808	Confirmed
DYNC1LI1	7.57345	7.5946	4.5038	10.3836	0.925926	Confirmed
ALG3	5.46929	5.45064	2.0578	8.81278	0.768769	Confirmed
TRIM25	3.76509	3.75464	0.197988	7.40108	0.482482	Tentative
TREM1	1.90475	1.84748	0.000903081	3.66028	0.00600601	Rejected
TRAPPC4	3.99087	4.01547	0.652107	7.09202	0.524525	Tentative
TMUB2	0.958757	1.0211	-0.867443	2.79057	0.001001	Rejected

## Sheet: Table S4
Table S4 Clinical characteristic between high- and low- risk groups
	High-risk	Low-risk	P value
Age (%)			0.562
≥60	83 (45.6%)	90 (49.2%)
＜60	99 (54.4%)	93 (50.8%)
Sex			0.48
Female	63 (34.6%)	56 (30.6%)
Male	119 (65.4%)	127 (69.4%)
T. Stage			1.52e-05
T1	68 (37.4%)	112 (62.2%)
T2	52 (28.6%)	39 (21.7%)
T3	52 (28.6%)	26 (14.4%)
T4	10 (5.5%)	3 (1.7%)
N. Stage			0.364
N0	121 (97.6%)	127 (99.2%)
Other	3 (2.4%)	1 (0.8%)
M. Stage			0.247
M0	130 (97.7%)	133 (100%)
Other	3 (2.3%)	0 (0%)
Stage			3e-05
I	62 (36.7%)	108 (62.8%)
II	47 (27.8%)	37 (21.5%)
III	57 (33.7%)	26 (15.1%)
Other	3 (1.8%)	1 (0.6%)
RFS			0.0103
Alive	80 (44%)	106 (57.9%)
Dead	102 (56%)	77 (42.1%)

## Sheet: Table S5
Table S5 The result of machine learning benchmark.
year	lasso	enet	ridge	plsR	coxboost	superpc	xgb
km_auc_1	0.8625	0.8625	0.875	0.8125	0.875	0.7875	0.80625
km_auc_3	0.523502	0.531628	0.519528	0.536765	0.537186	0.578859	0.730305
km_auc_5	0.190658	0.200761	0.214091	0.182859	0.207648	0.289096	0.574803
km_auc_10	0.190658	0.200761	0.214091	0.182859	0.207648	0.289096	0.574803
km_auc_1.1	0.887512	0.908096	0.906709	0.934046	0.894075	0.802955	0.942015
km_auc_3.1	0.544256	0.569073	0.566676	0.588417	0.544256	0.604429	0.670146
km_auc_5.1	0.544256	0.569073	0.566676	0.588417	0.544256	0.604429	0.670146
km_auc_10.1	0.667332	0.730504	0.746874	0.640351	0.639787	0.925882	0.350375
km_auc_1.2	0.562716	0.591018	0.580413	0.631685	0.574883	0.455708	0.65714
km_auc_3.2	0.54308	0.570623	0.5766	0.558496	0.557226	0.499338	0.504829
km_auc_5.2	0.749821	0.765014	0.741706	0.789651	0.749481	0.727576	0.600361
km_auc_10.2	0.749821	0.765014	0.741706	0.789651	0.749481	0.727576	0.600361
km_auc_1.3	0.674841	0.662891	0.726363	0.687056	0.670875	0.759151	0.8321
km_auc_3.3	0.380986	0.354427	0.335339	0.374686	0.348023	0.308164	0.679621
km_auc_5.3	0.354796	0.363852	0.320487	0.381077	0.318242	0.406878	0.642566
km_auc_10.3	0.354796	0.363852	0.320487	0.381077	0.318242	0.406878	0.642566
km_auc_1.4	0.865318	0.870937	0.881073	0.842631	0.865318	0.799923	0.841598
km_auc_3.4	0.840844	0.889896	0.90303	0.818429	0.855476	0.780548	0.761176
km_auc_5.4	0.665574	0.720217	0.749934	0.644272	0.679373	0.626933	0.572031
km_auc_10.4	0.515913	0.574434	0.591979	0.490421	0.532894	0.493597	0.549467
km_auc_1.5	0.644493	0.64411	0.606459	0.609003	0.635472	0.749855	0.463366
km_auc_3.5	0.804364	0.804696	0.780934	0.751361	0.79457	0.803638	0.711835
km_auc_5.5	0.637665	0.637837	0.725992	0.608995	0.622299	0.835108	0.772991
km_auc_10.5
km_auc_1.6	0.785354	0.760963	0.765479	0.791035	0.790304	0.725173	0.546243
km_auc_3.6	0.823764	0.820535	0.813109	0.768597	0.826324	0.747068	0.758981
km_auc_5.6	0.829724	0.830231	0.828776	0.809665	0.838366	0.868885	0.808985
km_auc_10.6
km_auc_1.7	0.584585	0.619773	0.64674	0.574727	0.589112	0.63313	0.675009
km_auc_3.7	0.693026	0.728155	0.763846	0.709244	0.697965	0.741565	0.780244
km_auc_5.7	0.567009	0.570017	0.558191	0.572941	0.572595	0.541942	0.593372
km_auc_10.7	0.706971	0.710628	0.701613	0.681166	0.712195	0.698149	0.761582
km_auc_1.8	0.796103	0.826294	0.842364	0.833164	0.800271	0.896163	0.808549
km_auc_3.8	0.652963	0.663319	0.665827	0.577701	0.657638	0.847618	0.753108
km_auc_5.8	0.69434	0.687527	0.718062	0.673803	0.694486	0.847436	0.809572
km_auc_10.8	0.465194	0.573664	0.646936	0.74482	0.463679	0.405472	0.711577
km_auc_1.9	0.80324	0.843157	0.864438	0.827443	0.817059	0.731151	0.902469
km_auc_3.9	0.524611	0.557265	0.582507	0.547789	0.543537	0.587967	0.748511
km_auc_5.9	0.524611	0.557265	0.582507	0.547789	0.543537	0.587967	0.748511
km_auc_10.9	0.334013	0.342156	0.342544	0.193442	0.312273	0.219392	0.692917

## Sheet: Table S6
Table S6 Curated published prognostic signatures for hepatocellular carcinoma
Signature	Article	Gene	DOI	coefficient
PMID33553243	Development and External Validation of a Novel Immune Checkpoint-Related Gene Signature for Prediction of Overall Survival in Hepatocellular Carcinoma	EGF	10.3389/fmolb.2020.620765.	0.384205
PMID33553243	Development and External Validation of a Novel Immune Checkpoint-Related Gene Signature for Prediction of Overall Survival in Hepatocellular Carcinoma	MAP2K2	10.3389/fmolb.2020.620765.	0.0128189
PMID33553243	Development and External Validation of a Novel Immune Checkpoint-Related Gene Signature for Prediction of Overall Survival in Hepatocellular Carcinoma	NRAS	10.3389/fmolb.2020.620765.	0.0637497
PMID33553243	Development and External Validation of a Novel Immune Checkpoint-Related Gene Signature for Prediction of Overall Survival in Hepatocellular Carcinoma	MCC	10.3389/fmolb.2020.620765.	-0.267498
PMID36189226	Regulatory T-cells-related signature for identifying a prognostic subtype of hepatocellular carcinoma with an exhausted tumor microenvironment	HMOX1	10.3389/fimmu.2022.975762.	0.164688
PMID36189226	Regulatory T-cells-related signature for identifying a prognostic subtype of hepatocellular carcinoma with an exhausted tumor microenvironment	MMP9	10.3389/fimmu.2022.975762.	0.049186
PMID36189226	Regulatory T-cells-related signature for identifying a prognostic subtype of hepatocellular carcinoma with an exhausted tumor microenvironment	CTSC	10.3389/fimmu.2022.975762.	0.165924
PMID36189226	Regulatory T-cells-related signature for identifying a prognostic subtype of hepatocellular carcinoma with an exhausted tumor microenvironment	SDC3	10.3389/fimmu.2022.975762.	0.0601754
PMID36189226	Regulatory T-cells-related signature for identifying a prognostic subtype of hepatocellular carcinoma with an exhausted tumor microenvironment	TNFRSF11B	10.3389/fimmu.2022.975762.	0.0916468
PMID32887635	A hypoxia-related signature for clinically predicting diagnosis, prognosis and immune microenvironment of hepatocellular carcinoma patients	PDSS1	10.1186/s12967-020-02492-9.	0.337
PMID32887635	A hypoxia-related signature for clinically predicting diagnosis, prognosis and immune microenvironment of hepatocellular carcinoma patients	SLC7A11	10.1186/s12967-020-02492-9.	0.383
PMID32887635	A hypoxia-related signature for clinically predicting diagnosis, prognosis and immune microenvironment of hepatocellular carcinoma patients	CDCA8	10.1186/s12967-020-02492-9.	0.356
PMID35078458	A novel prognostic model based on single-cell RNA sequencing data for hepatocellular carcinoma	CSTB	10.1186/s12935-022-02469-2.	0.257
PMID35078458	A novel prognostic model based on single-cell RNA sequencing data for hepatocellular carcinoma	TALDO1	10.1186/s12935-022-02469-2.	0.263
PMID35078458	A novel prognostic model based on single-cell RNA sequencing data for hepatocellular carcinoma	CLTA	10.1186/s12935-022-02469-2.	0.313

## Sheet: Table S7
Table S7 The detailed information of the datasets used in this study.
Accession	Organism	Disease	Tissue	Platform	Year	Sample size	Number of non-tumor tissue	Number of tumor tissue	Prognosis	Etiology	PMID/DOI
ICGC	Human	Hepatocellular carcinoma	Tumor and adjacent liver tissues	RNA-seq	2016	445	202	243	Available	Multiple	10.1158/1538-7445.AM2016-130
TCGA	Human	Hepatocellular carcinoma	Tumor and adjacent liver tissues	RNA-seq	2015	423	50	373	Available	Multiple	25691825
GSE14520	Human	Hepatocellular carcinoma	Tumor and adjacent liver tissues	Microarray	2010	488	241	247	Available	NA	21159642
GSE202069	Human	Hepatocellular carcinoma	Tumor and adjacent liver tissues	RNA-seq	2023	66	41	25	Available	HBV	37540187

## Sheet: Table S8
Table S8 The result of published prognostic signatures comparison.
Sample	Cohorts	Status	time	TPS	PMID35078458	PMID32887635	PMID36189226	PMID33553243
TCGA-2Y-A9GS-01	TCGA	1	724	1.36741	6.90895	5.13379	3.5226	0.0353799
TCGA-2Y-A9GT-01	TCGA	1	1624	0.30692	5.90993	2.55303	2.88839	-0.234416
TCGA-2Y-A9GU-01	TCGA	0	1939	0.272348	5.7039	3.54637	1.92627	0.385705
TCGA-2Y-A9GV-01	TCGA	1	2532	0.344155	6.10832	2.9236	3.42095	-0.116821
TCGA-2Y-A9GW-01	TCGA	1	1271	0.541474	6.64943	3.29054	3.14352	0.0927763
TCGA-2Y-A9GX-01	TCGA	0	2442	0.467715	6.64099	3.63307	3.34373	0.321021
TCGA-2Y-A9GY-01	TCGA	1	757	1.23224	7.17416	4.50527	3.61723	0.863609
TCGA-2Y-A9GZ-01	TCGA	1	848	0.354528	5.94399	2.83166	2.44357	-0.365286
TCGA-2Y-A9H0-01	TCGA	0	3675	0.457885	6.97594	3.5339	2.85759	0.500742
TCGA-2Y-A9H1-01	TCGA	1	1229	0.41958	6.72381	2.40397	2.47584	0.251407
TCGA-2Y-A9H2-01	TCGA	0	1731	0.609142	6.25342	4.11212	3.91592	0.126905
TCGA-2Y-A9H3-01	TCGA	0	1516	0.281091	6.1435	2.5281	2.64169	0.237513
TCGA-2Y-A9H4-01	TCGA	0	1452	0.355474	6.59135	3.19915	2.49712	-0.109174
TCGA-2Y-A9H5-01	TCGA	1	555	0.359638	6.35018	3.20736	2.44051	0.222395
TCGA-2Y-A9H6-01	TCGA	0	357	0.376658	6.00529	2.84772	2.73287	0.23114
TCGA-2Y-A9H7-01	TCGA	0	1168	0.265546	6.5742	2.99433	2.50005	0.268923
TCGA-2Y-A9H8-01	TCGA	1	633	0.824927	6.56951	3.80875	2.8908	0.178369
TCGA-2Y-A9H9-01	TCGA	0	697	0.313893	6.23627	3.05517	2.30097	-0.0677584
TCGA-2Y-A9HA-01	TCGA	1	36	1.34101	7.20222	4.35297	2.83575	0.400784
TCGA-2Y-A9HB-01	TCGA	0	260	0.335279	6.30976	3.18434	2.61851	0.483796
TCGA-3K-AAZ8-01	TCGA	0	396	0.366927	6.68209	3.07002	2.19935	0.387639
TCGA-4R-AA8I-01	TCGA	1	262	0.528265	6.6569	3.59704	2.97091	0.428982
TCGA-5C-A9VG-01	TCGA	0	328	0.797582	6.40727	4.29263	2.5632	0.254202
TCGA-5C-A9VH-01	TCGA	0	322	0.329607	6.85606	3.32704	2.38221	0.0713352
TCGA-5C-AAPD-01	TCGA	0	20	0.717387	7.09519	3.59842	3.25082	0.412343
TCGA-5R-AA1C-01	TCGA	0	520	0.613911	6.84044	4.0633	3.41896	0.30035
TCGA-5R-AA1D-01	TCGA	0	449	0.384076	6.4752	2.7641	2.67274	-0.225111
TCGA-5R-AAAM-01	TCGA	1	46	0.43161	6.33673	2.66913	3.15628	-0.192927
TCGA-BC-4072-01	TCGA	1	1490	0.625147	6.31361	4.07405	3.19538	0.501316
TCGA-BC-4073-01	TCGA	0	849	0.749298	6.80473	4.0539	3.50796	0.209534
TCGA-BC-A10Q-01	TCGA	1	1135	0.876083	6.57809	3.57451	3.07096	0.330058
TCGA-BC-A10R-01	TCGA	1	308	0.855446	6.21553	3.36209	2.43156	0.225334
TCGA-BC-A10S-01	TCGA	1	1423	0.417167	6.51661	2.7321	3.12626	0.0398804
TCGA-BC-A10T-01	TCGA	1	837	0.342958	6.28964	3.19375	2.50994	0.0330529
TCGA-BC-A10U-01	TCGA	1	837	0.892375	6.88865	3.82608	2.93329	0.492549
TCGA-BC-A10W-01	TCGA	1	91	3.3614	7.01056	5.42803	3.56737	0.579536
TCGA-BC-A10X-01	TCGA	1	770	0.459157	6.07009	2.52203	2.89126	-0.252484
TCGA-BC-A10Y-01	TCGA	1	711	0.433322	6.62493	3.84496	2.6261	0.147091
TCGA-BC-A10Z-01	TCGA	1	34	0.544089	6.57352	3.85682	2.24225	-0.0386662
TCGA-BC-A110-01	TCGA	1	2116	0.613222	6.02729	2.49671	3.22096	-0.0867932
TCGA-BC-A112-01	TCGA	1	153	1.95862	6.75171	5.14138	3.19404	0.852625
TCGA-BC-A216-01	TCGA	0	1351	0.377032	6.57241	3.80972	2.6138	-0.0501977
TCGA-BC-A217-01	TCGA	1	1397	0.789353	7.16943	3.80476	2.74352	0.443807
TCGA-BC-A3KF-01	TCGA	0	8	0.350094	6.5333	3.44959	2.356	-0.0523701
TCGA-BC-A3KG-01	TCGA	0	680	0.999065	7.1436	4.36825	2.40038	0.443154
TCGA-BC-A5W4-01	TCGA	1	547	0.71813	6.61508	3.17523	2.44397	0.257294
TCGA-BC-A69H-01	TCGA	0	444	0.858961	7.22898	3.51341	3.29372	0.393408
TCGA-BC-A69I-01	TCGA	0	387	0.358033	6.27963	2.43407	2.69168	0.208951
TCGA-BC-A8YO-01	TCGA	0	562	1.26793	7.14324	4.74303	3.3592	0.723134
TCGA-BD-A2L6-01	TCGA	0	1363	0.265107	6.31804	3.56753	2.24889	0.142732
TCGA-BD-A3EP-01	TCGA	0	409	0.337322	6.69823	3.41584	3.46565	0.4056
TCGA-BD-A3ER-01	TCGA	0	1115	0.444864	6.51632	3.09252	3.11078	0.321008
TCGA-BW-A5NO-01	TCGA	0	20	0.51259	6.80857	3.42627	2.83893	-0.0668561
TCGA-CC-5258-01	TCGA	1	129	0.949803	6.62641	4.40275	3.42573	-0.101223
TCGA-CC-5259-01	TCGA	0	250	0.364892	6.65535	2.58002	2.19505	0.201463
TCGA-CC-5260-01	TCGA	1	87	3.21136	6.98691	4.60323	3.31353	0.19917
TCGA-CC-5261-01	TCGA	1	97	2.49039	6.78716	3.78623	3.01668	-0.251363
TCGA-CC-5262-01	TCGA	1	103	2.21008	7.06378	4.16276	3.23983	0.107514
TCGA-CC-5263-01	TCGA	1	129	2.78963	6.92433	4.70351	3.19059	1.0153
TCGA-CC-5264-01	TCGA	1	102	3.63313	7.23392	4.83819	3.32423	0.466029
TCGA-CC-A123-01	TCGA	0	219	0.312392	6.92051	2.53844	2.49997	0.319351
TCGA-CC-A1HT-01	TCGA	1	101	4.39966	7.44561	5.37371	4.12745	0.579091
TCGA-CC-A3M9-01	TCGA	1	300	2.45125	7.32421	4.22786	3.88509	0.0759193
TCGA-CC-A3MA-01	TCGA	1	303	2.89148	6.51774	4.62111	3.70921	0.180364
TCGA-CC-A3MB-01	TCGA	1	315	1.73669	6.60873	4.51218	2.72616	0.294278
TCGA-CC-A3MC-01	TCGA	0	363	1.25172	6.63241	4.20011	2.97422	0.529898
TCGA-CC-A5UC-01	TCGA	1	347	0.597927	6.42535	4.1359	2.9547	-0.148092
TCGA-CC-A5UD-01	TCGA	1	304	2.63642	6.95589	4.79829	3.37561	0.307202
TCGA-CC-A5UE-01	TCGA	1	272	2.22285	6.86956	4.77524	3.15731	0.681822
TCGA-CC-A7IE-01	TCGA	1	217	0.930167	6.66548	3.67512	3.08109	0.344676
TCGA-CC-A7IF-01	TCGA	1	649	0.346007	5.98942	3.09456	1.99242	0.129177
TCGA-CC-A7IG-01	TCGA	1	299	2.12902	7.398	3.71469	3.17613	0.314307
TCGA-CC-A7IH-01	TCGA	0	365	0.369192	6.33217	3.48792	2.25557	0.312523
TCGA-CC-A7II-01	TCGA	0	399	0.977783	7.01888	4.26087	3.42134	0.204969
TCGA-CC-A7IJ-01	TCGA	0	382	2.02914	7.39066	5.71028	4.48381	0.617632
TCGA-CC-A7IK-01	TCGA	1	262	1.00734	6.57177	4.75778	2.60076	0.401826
TCGA-CC-A7IL-01	TCGA	1	278	0.451674	6.77333	2.84669	2.1656	-0.0336349
TCGA-CC-A8HS-01	TCGA	1	300	1.40576	6.68632	4.04531	2.39206	0.11768
TCGA-CC-A8HT-01	TCGA	1	140	3.58899	7.52312	5.03038	3.27582	0.626294
TCGA-CC-A8HU-01	TCGA	1	344	1.28237	7.13062	4.22684	2.46796	0.287284
TCGA-CC-A8HV-01	TCGA	1	279	1.58324	6.77456	3.68623	2.55708	0.218548
TCGA-CC-A9FS-01	TCGA	0	211	0.342973	6.30301	3.40655	2.31809	0.156155
TCGA-CC-A9FW-01	TCGA	0	248	1.0564	6.90353	3.87567	2.94829	0.382785
TCGA-DD-A113-01	TCGA	0	2425	0.325121	6.62975	3.74502	2.41606	0.593717
TCGA-DD-A114-01	TCGA	1	1149	1.22207	7.04965	4.73907	3.82471	0.465482
TCGA-DD-A115-01	TCGA	1	2542	0.488314	6.70143	3.58966	2.58412	0.40937
TCGA-DD-A116-01	TCGA	1	1622	0.51545	6.53765	3.73064	2.37578	0.415497
TCGA-DD-A118-01	TCGA	0	3437	0.320332	6.00213	3.54357	2.23181	0.240789
TCGA-DD-A119-01	TCGA	1	223	0.686415	6.84221	2.81767	2.394	0.236998
TCGA-DD-A11A-01	TCGA	0	79	0.446909	6.29689	3.44395	2.27333	0.0557612
TCGA-DD-A11B-01	TCGA	1	14	0.384551	5.92411	2.75858	2.27176	-0.0798618
TCGA-DD-A11C-01	TCGA	0	662	0.31886	6.398	3.54465	2.70352	-0.249342
TCGA-DD-A11D-01	TCGA	1	1560	0.335673	6.59709	2.6983	2.41516	-0.358346
TCGA-DD-A1EA-01	TCGA	0	2415	0.332207	6.31407	3.76566	2.65502	0.353077
TCGA-DD-A1EB-01	TCGA	0	2017	0.271055	6.28834	2.92956	2.02146	-0.0543046
TCGA-DD-A1EC-01	TCGA	0	602	0.528414	6.59952	3.80645	3.55277	0.723456
TCGA-DD-A1ED-01	TCGA	0	2301	0.2743	6.03446	2.57383	2.8456	-0.104315
TCGA-DD-A1EE-01	TCGA	1	349	0.905567	6.99832	3.44136	2.86449	1.22565
TCGA-DD-A1EF-01	TCGA	1	394	0.460873	6.07262	3.91711	3.22684	0.426331
TCGA-DD-A1EG-01	TCGA	1	1372	0.978865	7.21294	3.91265	3.38185	-0.0948999
TCGA-DD-A1EH-01	TCGA	0	1495	0.354734	6.51886	3.60077	2.35798	0.267166
TCGA-DD-A1EI-01	TCGA	0	183	0.831036	6.36825	4.00973	3.13615	-0.0153721
TCGA-DD-A1EJ-01	TCGA	1	1005	1.40273	6.99929	4.34438	3.03375	0.39898
TCGA-DD-A1EK-01	TCGA	1	558	0.744133	6.94845	3.06379	3.1802	-0.0944565
TCGA-DD-A1EL-01	TCGA	1	415	2.66636	7.2591	5.0478	3.55728	0.643782
TCGA-DD-A39V-01	TCGA	1	643	0.730926	6.97604	3.30782	2.59946	0.384635
TCGA-DD-A39W-01	TCGA	1	827	0.433667	5.96731	4.29739	2.42785	0.280082
TCGA-DD-A39X-01	TCGA	1	1694	0.598992	7.13029	3.30886	2.75884	0.205452
TCGA-DD-A39Y-01	TCGA	1	171	2.91197	7.69705	4.80629	3.52319	0.34518
TCGA-DD-A39Z-01	TCGA	1	601	0.374363	6.72323	3.09951	2.43467	0.358905
TCGA-DD-A3A1-01	TCGA	1	233	1.37975	6.992	4.14293	3.79533	0.467975
TCGA-DD-A3A2-01	TCGA	1	2131	0.355511	5.86438	2.39348	2.01002	0.307875
TCGA-DD-A3A3-01	TCGA	1	535	0.822428	7.06307	3.00944	2.24327	0.360983
TCGA-DD-A3A4-01	TCGA	1	612	0.576783	6.4983	2.86725	2.47755	-0.128389
TCGA-DD-A3A5-01	TCGA	1	3125	0.371795	6.76613	3.1882	2.15607	0.128668
TCGA-DD-A3A6-01	TCGA	1	3258	0.299598	6.7326	2.45877	2.64386	-0.0704532
TCGA-DD-A3A7-01	TCGA	1	419	1.05606	7.15851	3.24407	2.37742	0.641051
TCGA-DD-A3A8-01	TCGA	1	11	0.398042	6.2678	3.13893	2.38082	0.33498
TCGA-DD-A3A9-01	TCGA	1	931	0.826216	6.72834	2.95959	2.27452	0.277515
TCGA-DD-A4NA-01	TCGA	0	1008	0.568244	6.52347	3.88002	2.65063	0.229887
TCGA-DD-A4NB-01	TCGA	0	989	0.402551	6.39367	3.11654	2.73437	0.196912
TCGA-DD-A4ND-01	TCGA	0	2746	0.319304	6.30576	3.43487	3.10979	-0.407083
TCGA-DD-A4NE-01	TCGA	1	660	0.566424	6.33135	4.2364	2.61122	0.283456
TCGA-DD-A4NF-01	TCGA	0	942	0.350601	5.90985	4.17589	2.72669	0.358224
TCGA-DD-A4NG-01	TCGA	1	802	0.610362	6.23688	3.07811	2.58697	0.059214
TCGA-DD-A4NH-01	TCGA	0	917	0.972537	7.1345	3.93962	3.31502	0.0629169
TCGA-DD-A4NI-01	TCGA	0	816	0.267287	5.79922	2.26223	2.59167	-0.0566434
TCGA-DD-A4NJ-01	TCGA	0	928	0.457973	6.81256	3.85299	2.84418	-0.238164
TCGA-DD-A4NK-01	TCGA	1	1210	0.320679	5.95179	2.71384	2.20338	-0.232135
TCGA-DD-A4NL-01	TCGA	0	1711	0.276195	5.78247	2.30543	2.50206	-0.330968
TCGA-DD-A4NN-01	TCGA	1	899	0.771647	7.03756	3.53003	2.44878	0.0434207
TCGA-DD-A4NO-01	TCGA	0	2245	0.425988	6.50194	2.95522	2.60805	-0.00656513
TCGA-DD-A4NP-01	TCGA	0	3308	0.294082	6.06101	3.12993	2.33228	0.313916
TCGA-DD-A4NQ-01	TCGA	1	373	1.62687	7.32857	4.66914	3.49159	0.359268
TCGA-DD-A4NR-01	TCGA	1	9	1.73915	7.12745	4.51955	4.06055	0.491062
TCGA-DD-A4NS-01	TCGA	1	2456	0.602727	6.40081	3.16243	3.44659	-0.0937665
TCGA-DD-A4NV-01	TCGA	0	2398	0.284691	6.45325	2.8681	2.565	-0.220004
TCGA-DD-A73A-01	TCGA	0	728	0.286711	6.07513	3.44515	2.66508	0.161424
TCGA-DD-A73B-01	TCGA	1	283	0.930833	6.69312	3.42376	2.11298	-0.0482975
TCGA-DD-A73C-01	TCGA	0	701	0.311907	6.11819	3.28837	2.93622	-0.113924
TCGA-DD-A73D-01	TCGA	0	693	0.287757	6.05931	2.84109	1.71964	0.373797
TCGA-DD-A73E-01	TCGA	0	44	0.718715	6.6097	3.26761	2.86794	0.391166
TCGA-DD-A73F-01	TCGA	0	1085	0.339825	6.19737	3.72607	3.05811	0.189985
TCGA-DD-A73G-01	TCGA	0	3478	0.298735	6.86049	2.77305	2.06301	0.407023
TCGA-DD-AA3A-01	TCGA	1	410	2.70347	6.24054	4.55433	3.35424	0.412177
TCGA-DD-AAC8-01	TCGA	1	16	2.19195	7.10085	4.0332	2.96727	0.531058
TCGA-DD-AAC9-01	TCGA	0	347	0.337159	6.32901	2.67188	2.75676	0.0255231
TCGA-DD-AACA-01	TCGA	0	2301	0.347229	6.60289	3.28846	2.33888	0.332293
TCGA-DD-AACB-01	TCGA	0	2324	0.584275	7.18952	4.32075	3.38766	0.536453
TCGA-DD-AACC-01	TCGA	1	1685	0.347084	6.5082	3.194	3.38759	0.0261509
TCGA-DD-AACD-01	TCGA	1	381	0.457896	6.53021	2.93657	2.50831	0.309682
TCGA-DD-AACE-01	TCGA	0	2184	0.249653	5.77557	2.84823	2.00385	0.333609
TCGA-DD-AACF-01	TCGA	1	365	0.540925	6.54885	3.11185	2.73534	0.318718
TCGA-DD-AACG-01	TCGA	1	469	0.544914	7.0223	3.05919	2.78037	0.280751
TCGA-DD-AACH-01	TCGA	1	195	2.49382	7.27729	5.05601	3.46335	0.800295
TCGA-DD-AACI-01	TCGA	0	1618	0.393243	7.01588	2.76031	2.94278	0.686855
TCGA-DD-AACJ-01	TCGA	0	2102	0.328216	6.84338	2.25618	2.38849	0.420394
TCGA-DD-AACK-01	TCGA	0	9	0.484885	7.29899	4.52553	2.8281	0.702792
TCGA-DD-AACL-01	TCGA	1	107	3.56674	7.64428	4.03035	3.80899	-0.0120087
TCGA-DD-AACN-01	TCGA	0	1302	0.342954	6.43113	3.0719	2.95248	0.0477181
TCGA-DD-AACO-01	TCGA	0	1876	0.267075	6.85484	2.55474	1.93765	0.312522
TCGA-DD-AACP-01	TCGA	0	415	0.767452	6.91528	4.40978	3.04302	0.506669
TCGA-DD-AACQ-01	TCGA	1	432	0.313279	6.93924	3.9318	2.32306	1.02203
TCGA-DD-AACS-01	TCGA	0	1804	0.292228	6.63889	3.49939	2.27504	0.644578
TCGA-DD-AACT-01	TCGA	0	1562	0.25979	6.70453	3.05593	2.57823	0.000878653
TCGA-DD-AACU-01	TCGA	0	1567	0.436704	6.85206	3.42012	2.94427	0.497949
TCGA-DD-AACV-01	TCGA	0	1531	0.365513	6.47484	4.20126	2.40168	0.0536191
TCGA-DD-AACW-01	TCGA	0	1424	0.377295	6.56624	3.46414	2.51226	-0.209908
TCGA-DD-AACX-01	TCGA	0	170	0.760854	7.36434	3.50935	2.50874	0.454398
TCGA-DD-AACY-01	TCGA	0	1450	0.309363	6.13169	2.8472	2.41514	0.131909
TCGA-DD-AACZ-01	TCGA	1	171	2.60282	7.22727	4.37872	3.82284	-0.0860542
TCGA-DD-AAD0-01	TCGA	0	137	0.456253	6.93362	3.30202	2.31655	0.466127
TCGA-DD-AAD1-01	TCGA	0	564	0.353122	6.40429	3.58812	3.37359	0.103477
TCGA-DD-AAD2-01	TCGA	0	658	0.439183	6.49561	3.40886	3.09873	-0.0519666
TCGA-DD-AAD3-01	TCGA	0	1295	0.294244	6.36212	3.21053	2.74241	-0.0231977
TCGA-DD-AAD5-01	TCGA	0	1345	0.974996	7.56809	4.95497	3.50503	1.0717
TCGA-DD-AAD6-01	TCGA	0	672	0.374601	5.85871	3.57745	2.3064	0.441296
TCGA-DD-AAD8-01	TCGA	0	1219	0.247834	6.87998	3.36475	2.85195	0.805961
TCGA-DD-AADA-01	TCGA	0	1233	0.320977	6.11209	2.46767	2.32937	-0.00127265
TCGA-DD-AADB-01	TCGA	0	1242	0.736742	6.93744	3.84687	3.40015	0.377136
TCGA-DD-AADC-01	TCGA	1	425	1.31023	6.64439	4.67329	3.07324	0.39897
TCGA-DD-AADD-01	TCGA	0	1231	0.351593	6.48163	4.09713	2.63527	0.490898
TCGA-DD-AADF-01	TCGA	1	115	0.905358	6.645	3.20798	2.11217	0.0426683
TCGA-DD-AADG-01	TCGA	0	1145	0.274337	6.38349	3.44002	2.16002	0.317531
TCGA-DD-AADI-01	TCGA	0	1085	0.301938	7.18483	2.84497	2.68727	0.28146
TCGA-DD-AADJ-01	TCGA	0	1066	0.271674	6.61718	2.62753	2.2631	0.0450195
TCGA-DD-AADK-01	TCGA	0	1049	0.312694	6.16491	3.16196	2.77965	0.143741
TCGA-DD-AADL-01	TCGA	0	636	0.354464	6.50131	3.86617	2.68538	0.0254587
TCGA-DD-AADM-01	TCGA	1	12	0.596703	6.9528	3.37125	2.4446	0.0968114
TCGA-DD-AADN-01	TCGA	0	898	0.39125	7.31008	3.99391	3.1209	0.408585
TCGA-DD-AADO-01	TCGA	0	453	0.300127	7.21809	2.92603	2.80496	0.40389
TCGA-DD-AADP-01	TCGA	0	458	0.365045	6.01463	3.00935	2.34458	0.119311
TCGA-DD-AADQ-01	TCGA	0	436	0.290997	6.34353	2.94975	2.74906	-0.176148
TCGA-DD-AADR-01	TCGA	0	2028	0.368011	6.70118	3.3662	2.54082	-0.00779192
TCGA-DD-AADS-01	TCGA	0	474	0.308399	6.12396	1.8767	2.21867	0.0902744
TCGA-DD-AADU-01	TCGA	0	554	0.338354	6.47715	2.55437	2.02252	0.369281
TCGA-DD-AADV-01	TCGA	0	574	0.351187	6.52443	3.67901	2.78153	0.177158
TCGA-DD-AADW-01	TCGA	0	587	0.545885	6.73109	4.1652	2.834	-0.0117739
TCGA-DD-AADY-01	TCGA	0	555	0.342601	6.22813	3.10619	2.09781	0.278554
TCGA-DD-AAE0-01	TCGA	0	555	0.697966	7.1326	3.7934	2.40479	0.0688031
TCGA-DD-AAE1-01	TCGA	0	552	0.271312	6.50875	2.87944	2.80018	0.352439
TCGA-DD-AAE2-01	TCGA	0	638	0.248432	6.02951	3.05522	2.85049	0.256907
TCGA-DD-AAE3-01	TCGA	0	566	0.274297	6.25878	2.48296	2.2266	0.119135
TCGA-DD-AAE4-01	TCGA	0	608	0.311372	6.53978	2.47861	2.64131	0.0788955
TCGA-DD-AAE6-01	TCGA	0	141	0.275125	6.83345	3.56018	1.93032	0.0179375
TCGA-DD-AAE7-01	TCGA	0	644	0.278112	5.8845	2.61628	2.52209	-0.00270654
TCGA-DD-AAE9-01	TCGA	0	722	0.376129	6.87713	3.96365	2.85362	0.421079
TCGA-DD-AAEA-01	TCGA	0	575	0.288127	6.78074	3.27542	2.45211	-0.00481211
TCGA-DD-AAEB-01	TCGA	0	478	0.281234	5.9958	2.06868	1.73088	0.335892
TCGA-DD-AAED-01	TCGA	0	763	0.355207	6.58985	2.98659	2.11239	0.21009
TCGA-DD-AAEE-01	TCGA	0	810	0.422296	6.52571	3.93831	2.30341	0.28259
TCGA-DD-AAEG-01	TCGA	0	719	0.370614	6.66105	3.65782	2.53084	0.624417
TCGA-DD-AAEH-01	TCGA	0	784	0.28748	6.05413	2.99837	2.65286	0.0700083
TCGA-DD-AAEI-01	TCGA	0	1531	0.306148	6.58933	3.78082	2.67178	0.413035
TCGA-DD-AAEK-01	TCGA	0	1067	0.332409	6.38621	3.11498	3.09294	-0.177054
TCGA-DD-AAVP-01	TCGA	0	2752	0.281627	6.68085	3.86964	2.09826	0.310672
TCGA-DD-AAVQ-01	TCGA	0	2728	0.297847	6.69096	3.44335	3.05833	0.282356
TCGA-DD-AAVR-01	TCGA	0	2513	0.333922	6.81437	2.93332	2.86818	0.358364
TCGA-DD-AAVS-01	TCGA	0	1823	0.300659	6.62937	3.38606	2.48134	0.384638
TCGA-DD-AAVU-01	TCGA	0	2202	0.423739	7.11026	2.85465	2.62698	0.306783
TCGA-DD-AAVV-01	TCGA	0	2455	0.379014	6.89831	3.46919	3.0659	0.386943
TCGA-DD-AAVW-01	TCGA	0	2317	0.35153	6.47559	3.29943	2.73013	0.101428
TCGA-DD-AAVX-01	TCGA	0	1718	0.384223	6.44596	2.71942	2.65788	-0.242655
TCGA-DD-AAVY-01	TCGA	0	1970	0.312856	6.56622	2.63005	2.32656	0.0257118
TCGA-DD-AAVZ-01	TCGA	0	1900	0.336875	6.37826	3.46725	2.50623	0.0465895
TCGA-DD-AAW0-01	TCGA	0	2015	0.318831	6.38248	3.30645	3.08046	-0.0111505
TCGA-DD-AAW1-01	TCGA	0	1989	0.261141	6.04179	2.43659	2.11555	0.267492
TCGA-DD-AAW2-01	TCGA	0	1855	0.250984	6.07633	2.73938	2.13635	0.307356
TCGA-DD-AAW3-01	TCGA	0	1633	0.280543	6.24546	2.99485	2.39159	0.335195
TCGA-ED-A459-01	TCGA	0	910	0.68537	6.86347	3.91925	3.16536	-0.121241
TCGA-ED-A4XI-01	TCGA	0	819	0.274645	6.19327	2.67419	2.81347	0.216348
TCGA-ED-A5KG-01	TCGA	0	854	0.581124	6.66947	3.80301	3.71591	-0.0644149
TCGA-ED-A627-01	TCGA	0	423	0.460191	6.2265	2.72341	3.50678	-0.225741
TCGA-ED-A66X-01	TCGA	0	406	0.440229	6.5792	3.76052	3.39409	0.102478
TCGA-ED-A66Y-01	TCGA	1	296	0.674295	5.96843	3.62139	2.54077	-0.0425396
TCGA-ED-A7PX-01	TCGA	0	6	1.12316	7.05306	4.22603	3.01966	0.235253
TCGA-ED-A7PY-01	TCGA	0	390	0.302811	6.57089	2.83016	1.88397	0.197005
TCGA-ED-A7PZ-01	TCGA	0	6	0.673034	6.60294	3.25509	2.54323	0.277097
TCGA-ED-A7XO-01	TCGA	0	427	0.37424	6.79535	3.69101	2.66466	0.0280186
TCGA-ED-A7XP-01	TCGA	0	400	0.351113	6.83317	3.773	3.12469	0.407166
TCGA-ED-A82E-01	TCGA	0	408	0.806177	6.63083	3.2983	2.74745	0.197101
TCGA-ED-A8O5-01	TCGA	0	406	0.318021	5.834	3.25656	2.36305	0.181234
TCGA-ED-A8O6-01	TCGA	1	56	0.60901	7.03522	4.47672	2.89289	0.277331
TCGA-ED-A97K-01	TCGA	0	6	0.694375	6.8637	3.7687	3.69625	-0.0095033
TCGA-EP-A12J-01	TCGA	0	570	0.421462	6.44698	3.28564	2.28117	0.308762
TCGA-EP-A26S-01	TCGA	0	608	0.323021	6.16336	2.94334	2.50797	0.200694
TCGA-EP-A2KA-01	TCGA	1	627	0.863305	6.72607	3.72186	3.05795	0.473151
TCGA-EP-A2KB-01	TCGA	1	596	0.393266	6.61418	3.55941	2.37544	-0.0385988
TCGA-EP-A2KC-01	TCGA	1	19	0.385523	6.4632	3.61548	2.89004	0.156275
TCGA-EP-A3JL-01	TCGA	0	303	0.358143	6.53608	3.16329	2.91734	0.124969
TCGA-EP-A3RK-01	TCGA	0	363	0.596969	7.19547	4.5791	3.51792	0.379505
TCGA-ES-A2HS-01	TCGA	1	688	0.367665	6.63055	2.3908	2.06083	0.240415
TCGA-ES-A2HT-01	TCGA	1	438	0.767484	6.80707	2.70677	2.23837	-0.0746211
TCGA-FV-A23B-01	TCGA	1	1852	0.318789	5.97549	3.24118	2.87104	0.212892
TCGA-FV-A2QQ-01	TCGA	0	729	0.406087	7.04287	3.44276	2.90954	0.118281
TCGA-FV-A2QR-01	TCGA	1	581	0.38356	6.86474	3.68942	2.76523	0.0342305
TCGA-FV-A3I0-01	TCGA	0	848	0.769075	6.96191	3.15225	3.1304	0.376358
TCGA-FV-A3I1-01	TCGA	1	247	1.58624	6.99833	4.19437	3.25102	1.18831
TCGA-FV-A3R2-01	TCGA	1	194	1.76334	6.80783	3.79522	3.07022	-0.328176
TCGA-FV-A3R3-01	TCGA	1	366	0.659301	6.29364	2.63328	2.65616	0.264976
TCGA-FV-A495-01	TCGA	0	1	0.385042	6.92401	2.94632	2.5805	0.317147
TCGA-FV-A496-01	TCGA	0	10	0.315679	5.95118	3.1231	2.14832	-0.127584
TCGA-FV-A4ZP-01	TCGA	1	2486	0.526178	7.47185	3.39518	2.77148	0.368302
TCGA-FV-A4ZQ-01	TCGA	0	12	0.918927	6.8192	4.71581	3.29568	0.409646
TCGA-G3-A25S-01	TCGA	1	416	1.56064	7.28187	3.70523	2.47616	0.43877
TCGA-G3-A25T-01	TCGA	0	1553	0.451299	7.04199	3.89376	3.10854	0.249286
TCGA-G3-A25U-01	TCGA	0	1636	0.26868	5.99059	3.38773	2.20072	-0.154101
TCGA-G3-A25V-01	TCGA	0	860	0.480742	6.7601	3.25429	3.20875	0.0566977
TCGA-G3-A25X-01	TCGA	0	1779	0.593582	7.13704	4.02433	3.11707	0.308103
TCGA-G3-A25Y-01	TCGA	1	452	1.69627	6.96293	3.79262	3.28088	-0.21327
TCGA-G3-A25Z-01	TCGA	0	655	0.302076	6.38453	3.11084	2.43299	-0.111814
TCGA-G3-A3CG-01	TCGA	0	673	0.425943	6.53748	3.00584	2.48703	0.160567
TCGA-G3-A3CH-01	TCGA	0	780	0.299359	6.198	3.11589	2.46243	0.00780616
TCGA-G3-A3CI-01	TCGA	0	180	0.331614	5.7455	2.55297	2.7668	-0.157456
TCGA-G3-A3CJ-01	TCGA	0	594	0.346967	6.70466	2.23204	2.00638	0.287349
TCGA-G3-A3CK-01	TCGA	0	585	0.597789	6.74526	3.06472	2.66653	0.437532
TCGA-G3-A5SI-01	TCGA	1	768	0.715527	6.44118	3.58811	1.77982	0.350325
TCGA-G3-A5SJ-01	TCGA	0	698	0.630883	6.39273	4.28875	3.39562	0.476644
TCGA-G3-A5SK-01	TCGA	0	744	0.326742	5.93464	2.17224	2.50318	0.0594058
TCGA-G3-A5SL-01	TCGA	0	621	0.322121	6.04347	3.04319	2.31573	0.300592
TCGA-G3-A5SM-01	TCGA	0	520	0.410583	6.82211	3.14041	2.9761	0.0825632
TCGA-G3-A6UC-01	TCGA	0	671	0.273839	6.20338	2.6233	1.69101	0.0059756
TCGA-G3-A7M5-01	TCGA	0	447	0.293071	6.25321	2.44479	2.17473	-0.0651909
TCGA-G3-A7M6-01	TCGA	0	632	0.928472	6.55283	4.46058	3.53647	0.0592108
TCGA-G3-A7M7-01	TCGA	0	361	0.461652	6.8984	2.92063	2.68225	0.0114635
TCGA-G3-A7M8-01	TCGA	0	430	0.266911	5.85249	2.75151	2.63534	-0.224261
TCGA-G3-A7M9-01	TCGA	1	56	3.51891	7.25145	5.11297	3.45507	-0.0467488
TCGA-G3-AAUZ-01	TCGA	0	480	0.256164	6.54309	2.78423	2.30728	-0.0046744
TCGA-G3-AAV0-01	TCGA	0	476	0.333984	6.36426	2.63703	1.96708	0.183774
TCGA-G3-AAV1-01	TCGA	1	359	0.750592	6.30804	3.95194	2.47253	0.79538
TCGA-G3-AAV2-01	TCGA	0	372	0.273531	6.27683	2.56334	2.61275	0.273988
TCGA-G3-AAV3-01	TCGA	0	412	0.384009	6.68513	4.3618	3.63893	0.437386
TCGA-G3-AAV4-01	TCGA	1	27	0.923253	6.46386	3.87233	2.39099	0.371003
TCGA-G3-AAV5-01	TCGA	0	354	0.785205	7.11307	3.42247	2.902	0.419174
TCGA-G3-AAV6-01	TCGA	1	65	1.27208	7.14796	4.2713	2.9557	0.411886
TCGA-G3-AAV7-01	TCGA	0	361	2.09907	7.46935	5.03283	4.13516	0.366924
TCGA-GJ-A3OU-01	TCGA	0	879	0.600673	7.30656	3.69314	3.83646	0.0443997
TCGA-GJ-A6C0-01	TCGA	1	31	1.31527	6.92606	3.90737	3.48406	-0.273579
TCGA-GJ-A9DB-01	TCGA	1	67	0.678867	6.80567	4.10761	2.93648	0.0734956
TCGA-HP-A5MZ-01	TCGA	1	91	0.703874	6.69646	3.12157	3.12279	0.211262
TCGA-HP-A5N0-01	TCGA	1	752	0.342776	6.02586	3.03593	2.58454	0.0509977
TCGA-K7-A5RF-01	TCGA	0	631	0.351763	6.01997	2.44099	3.06067	-0.120192
TCGA-K7-A5RG-01	TCGA	0	519	0.327359	6.43482	3.53847	3.43206	0.162383
TCGA-K7-A6G5-01	TCGA	0	512	0.350672	6.72247	2.86898	2.77517	0.0558182
TCGA-K7-AAU7-01	TCGA	0	359	1.22587	6.68299	4.69977	3.59851	0.716746
TCGA-KR-A7K0-01	TCGA	1	65	0.93718	6.90725	3.30667	2.76141	1.11302
TCGA-KR-A7K2-01	TCGA	0	829	0.277969	6.39578	3.07735	1.98135	0.225475
TCGA-KR-A7K7-01	TCGA	0	951	0.46942	7.24524	3.57071	2.91022	0.384135
TCGA-KR-A7K8-01	TCGA	0	906	0.356165	6.82416	3.0942	2.96656	0.227247
TCGA-LG-A6GG-01	TCGA	0	387	0.487316	6.3638	3.57171	2.45772	-0.428277
TCGA-LG-A9QC-01	TCGA	0	425	0.394627	6.50501	3.30804	2.41435	0.267518
TCGA-LG-A9QD-01	TCGA	0	366	0.275641	6.17469	2.48261	2.46531	0.0291061
TCGA-MI-A75C-01	TCGA	0	291	0.990726	7.14333	3.53676	2.74867	0.367251
TCGA-MI-A75E-01	TCGA	0	507	0.349989	6.59287	3.01651	3.14749	-0.0663427
TCGA-MI-A75G-01	TCGA	0	698	0.411749	6.69292	2.8383	2.12242	-0.169383
TCGA-MI-A75H-01	TCGA	0	747	0.356823	6.62803	2.72782	3.00175	0.259766
TCGA-MI-A75I-01	TCGA	0	630	0.418756	6.82881	4.00702	2.88087	0.439997
TCGA-MR-A520-01	TCGA	0	229	0.312019	5.72659	2.59022	2.45534	-0.196548
TCGA-MR-A8JO-01	TCGA	0	330	0.381962	6.16779	3.36644	3.15519	-0.054641
TCGA-NI-A4U2-01	TCGA	1	1791	0.274658	6.16346	3.00777	1.84109	0.142644
TCGA-NI-A8LF-01	TCGA	0	799	0.318025	6.17991	2.60328	2.0313	0.25639
TCGA-O8-A75V-01	TCGA	0	538	0.398744	6.71236	2.98777	3.0574	0.232715
TCGA-PD-A5DF-01	TCGA	1	639	0.774755	7.04111	4.00086	3.07313	-0.00780178
TCGA-QA-A7B7-01	TCGA	0	94	0.330464	6.6713	4.14345	2.34365	0.0949963
TCGA-RC-A6M4-01	TCGA	0	22	0.387656	6.18093	2.83984	2.51496	0.436143
TCGA-RC-A6M5-01	TCGA	0	15	0.35251	6.27836	2.83198	2.56743	0.0787576
TCGA-RC-A6M6-01	TCGA	0	9	1.62579	7.49121	4.09707	3.05607	0.424632
TCGA-RC-A7S9-01	TCGA	0	640	0.421809	6.25735	3.3829	2.68513	0.265621
TCGA-RC-A7SB-01	TCGA	0	588	0.357711	6.26009	3.21311	2.60412	-0.0952516
TCGA-RC-A7SF-01	TCGA	0	579	0.277032	5.75999	3.10341	2.58098	0.16376
TCGA-RC-A7SH-01	TCGA	0	468	0.420758	7.29561	3.4707	1.65542	0.0821512
TCGA-RC-A7SK-01	TCGA	0	472	0.362657	6.75138	3.08964	2.40217	0.360877
TCGA-RG-A7D4-01	TCGA	0	1098	0.523186	6.49904	3.78422	2.93677	0.429286
TCGA-T1-A6J8-01	TCGA	0	23	0.368767	6.68023	2.88443	2.62013	0.0556166
TCGA-UB-A7MA-01	TCGA	0	848	0.990897	6.5781	4.00513	3.20059	0.0863624
TCGA-UB-A7MB-01	TCGA	0	601	0.831513	6.64281	4.34933	2.60345	-0.0269804
TCGA-UB-A7MC-01	TCGA	0	500	0.325866	6.87343	3.83013	2.58448	0.528579
TCGA-UB-A7MD-01	TCGA	1	52	1.28425	7.45636	4.15877	3.26945	0.647082
TCGA-UB-A7ME-01	TCGA	0	486	0.414649	6.52547	3.40296	2.74327	0.266786
TCGA-UB-A7MF-01	TCGA	1	214	1.08222	6.84975	3.676	2.96083	0.407432
TCGA-UB-AA0U-01	TCGA	0	327	0.495188	6.45194	3.47902	2.89157	-0.0478947
TCGA-UB-AA0V-01	TCGA	0	314	0.331864	5.76128	2.51189	2.80884	-0.111749
TCGA-WJ-A86L-01	TCGA	0	345	0.266542	6.35718	3.80717	2.41693	0.115518
TCGA-WQ-A9G7-01	TCGA	0	30	0.353051	7.06507	3.71511	2.5857	0.263242
TCGA-WQ-AB4B-01	TCGA	0	395	0.294968	6.84085	2.9171	2.39355	-0.00678986
TCGA-WX-AA44-01	TCGA	0	615	0.620882	6.8473	4.14384	3.09079	1.03563
TCGA-WX-AA46-01	TCGA	0	756	0.261586	5.94039	2.33287	2.52606	-0.150155
TCGA-WX-AA47-01	TCGA	1	556	0.489437	6.08406	2.99246	2.22469	0.0157653
TCGA-XR-A8TC-01	TCGA	0	1339	0.567009	6.34664	3.58322	1.92522	-0.0206667
TCGA-XR-A8TD-01	TCGA	0	1030	0.448111	7.06304	3.57697	3.09225	0.0344349
TCGA-XR-A8TE-01	TCGA	0	925	0.367273	6.27764	3.72977	3.11339	0.304126
TCGA-XR-A8TF-01	TCGA	1	693	0.71702	6.29834	3.00975	2.00277	-0.153458
TCGA-XR-A8TG-01	TCGA	0	898	0.505451	6.41568	3.87646	2.96888	0.463054
TCGA-YA-A8S7-01	TCGA	1	412	1.81938	7.4477	5.21418	4.05839	0.502075
TCGA-ZP-A9CV-01	TCGA	1	1088	0.447258	6.45447	3.10391	2.73064	0.031458
TCGA-ZP-A9CY-01	TCGA	0	782	0.338911	6.41193	2.76983	2.89526	-0.159329
TCGA-ZP-A9CZ-01	TCGA	0	706	0.488198	6.72548	3.67504	2.91786	0.447945
TCGA-ZP-A9D0-01	TCGA	0	1091	0.311971	6.06661	2.82468	2.01541	0.122522
TCGA-ZP-A9D1-01	TCGA	0	21	0.432263	6.76468	3.51589	2.62477	-0.161537
TCGA-ZP-A9D2-01	TCGA	1	765	2.16845	7.03365	4.39252	3.37568	0.555904
TCGA-ZP-A9D4-01	TCGA	0	395	0.276676	6.45568	2.79959	2.41067	-0.0822808
TCGA-ZS-A9CD-01	TCGA	1	1386	0.532186	7.05086	3.0906	2.78912	0.00782977
TCGA-ZS-A9CE-01	TCGA	0	1241	0.299299	6.44147	3.20714	2.23849	-0.133641
TCGA-ZS-A9CF-01	TCGA	0	2412	0.342238	6.4527	3.2603	2.53263	0.187217
TCGA-ZS-A9CG-01	TCGA	0	341	0.286093	6.21931	2.68098	2.94172	0.233607
SA560620	LIRI_JP	0	510	2.27501	6.98154	3.82842	3.44877	0.282564
SA560622	LIRI_JP	0	1080	0.929457	6.7158	4.21051	2.65041	0.00808512
SA560624	LIRI_JP	1	240	1.55536	7.59228	5.23934	3.14635	1.22622
SA560626	LIRI_JP	0	900	0.644411	5.87113	3.73494	2.21923	0.324467
SA560628	LIRI_JP	0	1350	0.521834	6.60097	3.81659	3.09358	0.951476
SA560630	LIRI_JP	1	540	0.766325	6.76127	4.71401	2.82036	0.571274
SA560632	LIRI_JP	0	360	0.729601	6.72813	3.3376	2.83734	0.243908
SA560634	LIRI_JP	0	1260	0.366448	6.61904	2.75244	3.17298	-0.0212594
SA560636	LIRI_JP	1	570	0.442771	6.68475	4.3394	2.80944	0.642713
SA560638	LIRI_JP	0	1560	0.709398	6.45216	3.69592	2.62109	-0.16741
SA560640	LIRI_JP	0	1020	0.295206	6.13696	3.05857	2.31346	-0.280015
SA560642	LIRI_JP	1	1320	0.375745	6.10836	2.95792	2.61202	0.130187
SA560644	LIRI_JP	0	1200	0.280878	5.69632	2.09777	2.23135	-0.253878
SA560647	LIRI_JP	0	1290	0.348112	6.8227	3.77866	3.09555	0.144291
SA560649	LIRI_JP	1	240	2.05773	7.46702	3.98269	3.55575	0.358419
SA560651	LIRI_JP	0	600	1.20935	7.16243	4.54941	4.1575	0.574385
SA560653	LIRI_JP	0	1680	0.367869	6.1844	3.19177	1.93566	0.215447
SA560655	LIRI_JP	0	300	1.24302	6.67611	3.60731	3.23803	0.232103
SA560657	LIRI_JP	0	750	0.406944	5.87159	2.73525	2.76107	-0.214679
SA560659	LIRI_JP	0	1620	0.28762	6.433	2.16264	1.7029	0.440492
SA560661	LIRI_JP	0	900	0.582084	6.42332	3.09386	3.46807	0.0465918
SA560663	LIRI_JP	0	210	0.309902	5.85343	2.98918	2.57372	0.0906288
SA560665	LIRI_JP	0	1200	0.492226	6.40702	3.38564	2.50851	0.0606877
SA560667	LIRI_JP	0	960	0.323684	6.5399	3.07996	1.48226	0.568569
SA560668	LIRI_JP	0	990	0.278427	6.46821	2.82003	2.86969	-0.0658704
SA560670	LIRI_JP	0	1020	0.423635	6.29555	3.38004	2.77633	0.0539806
SA560671	LIRI_JP	0	1170	0.33666	6.35694	3.84869	2.63425	0.140088
SA560673	LIRI_JP	1	1200	1.70936	7.44915	4.22877	3.07279	0.825642
SA560675	LIRI_JP	0	1590	0.282724	5.99015	2.771	2.26445	-0.27996
SA560677	LIRI_JP	0	450	0.515976	6.41744	3.22476	2.82098	-0.15578
SA560679	LIRI_JP	1	270	0.720253	6.88973	4.96241	3.17132	0.631892
SA560681	LIRI_JP	0	330	0.720193	6.74829	4.21353	2.34551	-0.00457945
SA560683	LIRI_JP	0	630	0.808554	6.41617	4.15471	3.32603	-0.110787
SA560685	LIRI_JP	1	60	1.79937	7.09395	5.34678	3.55843	1.61448
SA560687	LIRI_JP	0	870	0.354177	6.07319	3.60006	2.86213	0.402981
SA560689	LIRI_JP	0	600	0.433855	6.95201	3.86961	2.53797	0.460314
SA560691	LIRI_JP	0	930	0.654996	6.0559	3.94716	3.66921	0.297296
SA560693	LIRI_JP	1	90	1.98868	7.21187	5.25215	3.448	0.390883
SA560695	LIRI_JP	1	720	0.894129	6.72213	4.68547	2.90437	0.744149
SA560697	LIRI_JP	0	1320	0.35391	6.28058	3.26601	2.90501	0.186156
SA560699	LIRI_JP	0	1200	0.532296	6.52012	3.61265	2.78527	0.203714
SA560701	LIRI_JP	1	1260	1.02673	7.30551	4.99569	3.30268	0.340755
SA560702	LIRI_JP	0	1650	0.293639	6.48189	2.33223	2.73367	-0.0890507
SA560704	LIRI_JP	0	690	0.619314	7.0452	3.82332	3.15673	0.254401
SA560706	LIRI_JP	0	1170	0.323254	6.68725	4.16972	2.84825	0.241642
SA560707	LIRI_JP	0	900	0.322065	6.15616	3.18141	3.18632	-0.0326374
SA560709	LIRI_JP	1	390	0.82458	7.10342	4.29314	3.07519	0.218072
SA560711	LIRI_JP	0	390	0.35694	5.6377	2.31625	2.71263	-0.388409
SA560713	LIRI_JP	1	510	1.12893	7.30988	4.19508	2.86424	0.481986
SA560715	LIRI_JP	0	1290	1.09697	6.70175	3.32883	3.31692	0.0369475
SA560717	LIRI_JP	0	990	0.643426	6.80805	3.24154	2.73555	0.220753
SA560719	LIRI_JP	1	270	1.50709	7.05818	4.24953	3.42753	-0.111877
SA560721	LIRI_JP	0	480	0.834209	7.35211	2.73344	2.90395	0.518777
SA560723	LIRI_JP	0	1440	0.855944	7.88293	4.70622	2.44985	0.573332
SA560725	LIRI_JP	0	390	0.572749	6.88189	5.12864	3.66996	0.163758
SA560727	LIRI_JP	0	930	0.300013	6.54706	3.06046	2.54487	0.0819614
SA560728	LIRI_JP	0	600	1.76248	7.02455	4.12118	3.51744	0.427811
SA560730	LIRI_JP	1	1440	0.485424	5.72321	2.7605	2.66341	-0.295063
SA560733	LIRI_JP	0	1050	0.948733	6.50583	4.35643	3.35194	-0.0540679
SA560735	LIRI_JP	0	1680	0.297804	6.07718	2.57133	2.53028	-0.22156
SA560737	LIRI_JP	0	1170	0.608107	6.56356	3.62041	3.04063	-0.241844
SA560739	LIRI_JP	1	360	0.765771	7.18102	4.3935	3.05504	0.542105
SA560741	LIRI_JP	0	1320	0.634462	6.69811	3.30915	3.39423	-0.140748
SA560972	LIRI_JP	0	870	0.451352	6.49613	4.1899	2.42834	0.0666836
SA560984	LIRI_JP	0	1590	0.30561	6.2438	3.13633	2.23571	0.0384644
SA561015	LIRI_JP	0	1470	0.541974	6.47801	3.64571	3.11748	0.200947
SA561024	LIRI_JP	1	1440	0.606702	7.26486	4.50532	3.12181	0.270486
SA561027	LIRI_JP	1	660	0.301992	6.35378	3.30174	1.92933	0.32919
SA570928	LIRI_JP	1	10	2.35042	7.30485	4.50009	3.27689	0.787372
SA570931	LIRI_JP	0	750	0.674693	7.27487	4.26627	3.16718	0.118571
SA594207	LIRI_JP	0	1620	0.445181	6.4591	2.98964	2.76564	0.201393
SA594223	LIRI_JP	1	1290	0.307374	6.32962	3.0444	1.94417	0.390322
SA594231	LIRI_JP	1	1290	0.307374	6.32962	3.0444	1.94417	0.390322
SA594269	LIRI_JP	0	1680	0.365681	6.219	3.33362	1.97193	-0.0133956
SA594297	LIRI_JP	0	1710	0.306603	6.19767	2.51874	2.1779	-0.074783
SA594313	LIRI_JP	0	1590	0.368196	6.19727	2.2137	2.49964	0.0174587
SA594340	LIRI_JP	0	840	0.311858	6.96182	3.74087	2.87234	0.345478
SA594358	LIRI_JP	1	1110	0.416132	6.60692	3.1885	2.51765	0.180529
SA594368	LIRI_JP	0	1530	0.34418	6.7181	3.08789	2.34267	0.446415
SA594383	LIRI_JP	1	420	1.01927	6.4761	5.22283	3.54415	0.630187
SA594388	LIRI_JP	0	390	1.15169	7.50164	4.29984	2.77997	0.539987
SA594397	LIRI_JP	0	1470	0.356144	6.74408	2.98782	1.89237	0.111569
SA594402	LIRI_JP	1	780	0.616742	6.93714	3.83574	2.28907	1.66799
SA594414	LIRI_JP	0	1410	1.00238	6.97658	3.54034	3.38376	0.00460207
SA594432	LIRI_JP	0	1320	0.35814	5.93019	2.46557	2.28079	-0.165579
SA594445	LIRI_JP	0	870	0.986505	7.23674	3.94899	2.81382	0.335583
SA594458	LIRI_JP	0	1260	0.385587	6.14615	2.33278	2.22864	-0.105381
SA594463	LIRI_JP	1	180	0.703862	6.66306	3.68715	2.71613	0.570121
SA594486	LIRI_JP	0	1260	0.350664	6.37113	2.74681	2.42645	0.394463
SA594500	LIRI_JP	0	1260	0.350103	6.32757	2.77974	2.13386	0.233424
SA594507	LIRI_JP	0	1380	0.48101	6.92834	3.52917	3.1676	-0.0366203
SA594514	LIRI_JP	0	2160	1.28009	6.83724	5.37277	4.10914	0.0926615
SA594531	LIRI_JP	0	1980	1.05068	6.81196	4.61193	3.65564	-0.141665
SA594546	LIRI_JP	0	1200	1.34302	6.90384	4.60315	2.61044	0.544318
SA594558	LIRI_JP	0	1290	0.573178	6.56347	4.37034	3.13154	0.391578
SA594564	LIRI_JP	0	450	0.452705	7.09871	3.49887	2.40672	0.356543
SA594576	LIRI_JP	0	1230	0.555972	6.83012	3.60918	2.79052	0.0202576
SA594586	LIRI_JP	0	1140	0.645251	6.59537	2.75198	1.7106	0.296279
SA594599	LIRI_JP	0	600	0.376725	6.08645	3.07559	2.45073	0.0543296
SA594611	LIRI_JP	0	1200	0.339191	5.87286	2.33039	3.04943	-0.0849445
SA594627	LIRI_JP	1	570	0.280724	6.54258	3.07469	2.6104	0.029977
SA594647	LIRI_JP	0	1260	0.277995	6.43866	3.39362	2.74166	0.177387
SA594656	LIRI_JP	0	1260	0.335329	5.55292	1.65254	2.24591	-0.0518142
SA594677	LIRI_JP	0	1200	0.318217	6.35806	2.86392	2.8144	0.0336332
SA594692	LIRI_JP	1	120	0.340028	6.45245	3.79203	2.94995	0.484462
SA594724	LIRI_JP	1	20	0.301515	5.87373	3.61312	1.52116	0.488378
SA594739	LIRI_JP	0	1320	0.380119	6.62583	2.96897	2.54505	-0.2189
SA594753	LIRI_JP	0	1140	0.268114	6.1112	2.01585	2.04327	0.463436
SA594777	LIRI_JP	0	1350	0.388495	6.22026	2.82882	2.72129	0.432182
SA594785	LIRI_JP	0	1200	0.244123	7.15132	3.55688	3.31904	0.267178
SA594792	LIRI_JP	0	900	0.335749	6.37491	2.263	2.73185	0.0920107
SA594801	LIRI_JP	0	630	2.14243	8.10253	4.96472	3.34497	1.17528
SA594821	LIRI_JP	0	1050	0.298828	6.30828	3.70511	2.82922	-0.208632
SA595191	LIRI_JP	0	1110	1.66193	6.91919	5.62955	3.11452	0.563018
SA595195	LIRI_JP	0	1350	1.38006	6.88336	4.2673	2.46666	0.0411963
SA595204	LIRI_JP	0	240	1.15649	8.0001	4.45847	2.96585	-0.0658443
SA595212	LIRI_JP	0	1080	1.71662	7.91889	3.62814	3.81978	0.237235
SA595217	LIRI_JP	0	1050	1.08096	6.9057	3.96129	2.97074	-0.09203
SA595224	LIRI_JP	0	1170	0.327813	5.86429	2.17128	2.56787	-0.41997
SA595236	LIRI_JP	0	1050	0.753688	7.27683	4.23368	3.21867	0.176448
SA595242	LIRI_JP	0	1050	1.68344	6.68608	4.53635	3.02168	0.274759
SA595251	LIRI_JP	0	1050	0.28744	6.25856	2.72217	2.92295	-0.127118
SA595257	LIRI_JP	0	1020	0.327645	6.43412	2.88584	1.59027	0.268082
SA595264	LIRI_JP	0	930	0.320816	6.04532	3.04609	2.24188	0.380121
SA595269	LIRI_JP	0	900	0.731626	5.45122	4.6753	2.65754	0.398679
SA595276	LIRI_JP	1	180	0.724724	6.32478	2.94129	3.77423	0.119925
SA595282	LIRI_JP	0	900	0.561912	6.86998	4.17413	2.87567	1.21467
SA595288	LIRI_JP	0	900	0.284256	5.61632	2.11582	2.94521	-0.277035
SA595294	LIRI_JP	0	960	0.374727	6.02695	3.04002	2.28047	-0.0285134
SA595301	LIRI_JP	0	900	0.315531	6.45997	3.62093	1.72586	0.393521
SA595308	LIRI_JP	1	120	0.575541	6.90842	5.17571	3.00898	1.43462
SA595315	LIRI_JP	0	840	0.273558	6.12027	3.45285	1.78072	0.102309
SA595326	LIRI_JP	0	960	0.40422	7.29267	3.14965	3.40389	0.0154006
SA595329	LIRI_JP	0	930	0.313095	6.05875	2.36252	2.8574	0.283813
SA595338	LIRI_JP	1	900	0.797676	6.34746	4.1658	2.33215	-0.145772
SA595345	LIRI_JP	0	450	0.352976	5.70857	2.64522	2.3005	-0.198423
SA595353	LIRI_JP	0	1080	0.361309	6.30581	3.05595	2.51843	0.400446
SA595355	LIRI_JP	0	1110	0.365908	6.94272	3.664	2.11101	0.414342
SA595357	LIRI_JP	0	750	0.691666	6.75704	4.51079	2.75495	0.988832
SA595366	LIRI_JP	0	930	0.533663	6.7578	3.23414	3.03414	0.0380282
SA595371	LIRI_JP	0	960	1.27012	6.94869	4.89411	3.06433	0.457708
SA595378	LIRI_JP	0	1020	0.31471	6.57988	3.10282	3.06224	0.340827
SA595384	LIRI_JP	0	720	0.422168	6.39776	3.25393	2.45324	0.253098
SA595385	LIRI_JP	0	900	0.289141	6.38185	3.12064	2.96588	-0.155818
SA595386	LIRI_JP	0	960	0.333335	5.74205	2.49805	2.52962	-0.394092
SA595388	LIRI_JP	1	570	0.340018	6.22049	3.46969	2.52115	0.190498
SA595392	LIRI_JP	0	1050	0.431527	6.46093	4.30046	3.21757	0.406367
SA595394	LIRI_JP	0	1020	1.23556	7.75589	4.05293	3.76607	0.629657
SA595398	LIRI_JP	0	840	0.392447	6.44815	2.7269	2.53547	0.263567
SA595402	LIRI_JP	0	990	0.679598	6.7008	4.26023	3.27611	0.612562
SA595405	LIRI_JP	0	810	0.805615	6.84322	3.69883	3.16185	-0.0197795
SA595413	LIRI_JP	0	720	0.337435	6.79607	2.96638	1.93018	0.433696
SA595417	LIRI_JP	1	810	0.855867	6.97273	3.80871	2.94278	0.174683
SA595421	LIRI_JP	0	990	0.317249	6.12553	2.64102	2.92931	-0.179581
SA595425	LIRI_JP	0	990	0.593108	6.34626	2.26864	3.18833	0.365965
SA595428	LIRI_JP	0	1020	0.348466	6.24981	3.02038	3.16765	0.0351937
SA595432	LIRI_JP	1	150	0.439255	5.98324	2.46615	3.33805	-0.319324
SA595437	LIRI_JP	1	570	1.27677	7.78535	5.61963	3.23013	1.24922
SA595441	LIRI_JP	0	810	0.579491	6.8877	4.2693	3.30053	0.133791
SA595446	LIRI_JP	0	810	0.410305	6.74233	4.02212	2.33787	0.337529
SA595450	LIRI_JP	0	780	0.479518	7.40844	4.23165	2.56364	0.173333
SA595454	LIRI_JP	0	750	1.10911	6.54016	5.12072	3.43294	0.671184
SA595458	LIRI_JP	0	750	1.34582	6.84178	3.02158	2.46315	1.1054
SA595460	LIRI_JP	0	1320	1.55076	7.18231	4.83384	3.92791	0.603865
SA595462	LIRI_JP	0	480	1.44672	6.88216	3.94115	3.35321	0.343957
SA595463	LIRI_JP	0	480	1.44672	6.88216	3.94115	3.35321	0.343957
SA595464	LIRI_JP	0	870	0.263241	6.45774	3.00871	1.86228	0.278634
SA595466	LIRI_JP	0	810	0.385695	6.50121	3.78517	2.59966	0.0477631
SA595468	LIRI_JP	1	690	0.258278	6.45451	2.99152	2.43999	0.124195
SA595470	LIRI_JP	0	720	0.394341	6.73224	3.00574	3.0891	0.454441
SA595472	LIRI_JP	1	180	1.23587	6.5646	4.59243	2.70718	0.671792
SA595474	LIRI_JP	0	1320	0.427963	6.59833	4.00717	2.20865	-0.111185
SA595475	LIRI_JP	0	690	0.436238	6.29209	3.57	2.08957	0.276955
SA595477	LIRI_JP	0	570	1.10414	7.14166	4.35197	3.73426	0.191014
SA595480	LIRI_JP	1	720	0.4889	6.66907	3.54417	2.85038	0.153941
SA595481	LIRI_JP	0	900	0.316523	6.32126	2.69339	1.77136	-0.0585015
SA595483	LIRI_JP	0	600	2.05326	7.68671	4.02098	2.61907	-0.0222671
SA595485	LIRI_JP	0	780	0.317226	6.54678	3.15267	3.00848	-0.0590416
SA595487	LIRI_JP	1	390	0.38713	6.14034	2.72209	1.99371	0.42706
SA595489	LIRI_JP	0	150	0.859354	6.77904	4.12609	3.39115	0.055157
SA595491	LIRI_JP	0	630	0.759763	6.83788	4.62637	3.41561	0.0720262
SA595493	LIRI_JP	0	630	1.35136	7.14122	4.87405	3.28441	0.190367
SA595495	LIRI_JP	0	600	0.340453	6.49697	3.04054	3.13901	-0.0899711
SA595497	LIRI_JP	0	600	0.268987	6.60109	2.71686	2.80174	0.157321
SA595499	LIRI_JP	0	720	0.884735	6.75378	3.53978	2.97777	0.352437
SA595501	LIRI_JP	0	240	0.51141	7.11198	3.90588	2.32041	0.219675
SA595503	LIRI_JP	0	600	0.307902	6.35337	2.38155	2.67275	-0.368611
SA595504	LIRI_JP	0	570	0.367798	6.44859	3.28906	3.0506	0.231586
SA595506	LIRI_JP	0	570	0.236315	6.3308	2.87308	1.97048	0.413984
SA595508	LIRI_JP	0	540	1.37428	7.54768	3.96445	3.68435	0.383346
SA595510	LIRI_JP	1	480	0.712434	7.17263	4.04351	1.85097	0.56182
SA595512	LIRI_JP	0	480	0.790541	6.99014	4.55788	2.61427	0.45608
SA595514	LIRI_JP	0	720	0.340712	6.7608	2.53283	2.37566	-0.0745141
SA595516	LIRI_JP	0	690	0.350542	5.99318	2.26614	2.69651	-0.0770489
SA595517	LIRI_JP	0	870	0.408617	6.56815	3.35999	2.73705	0.480262
SA595519	LIRI_JP	0	720	0.456995	6.52074	2.93286	3.1623	0.63524
SA595521	LIRI_JP	0	690	0.37477	6.71649	3.15399	2.62572	0.28206
SA595522	LIRI_JP	0	630	2.21857	7.11148	4.74353	4.17268	0.362647
SA595524	LIRI_JP	0	480	0.285857	6.66272	2.53359	1.83456	0.360889
SA595526	LIRI_JP	1	90	0.327037	6.64097	3.27019	2.08081	0.565126
SA595528	LIRI_JP	0	480	0.290033	6.32607	2.87748	3.2536	0.211465
SA595530	LIRI_JP	0	570	0.277254	6.18752	2.78596	2.10854	-0.154745
SA595532	LIRI_JP	1	480	0.624489	7.04332	5.24122	3.00168	0.859105
SA595534	LIRI_JP	0	540	0.371112	6.63467	3.80116	2.27144	-0.347932
SA595535	LIRI_JP	0	540	0.371112	6.63467	3.80116	2.27144	-0.347932
SA595537	LIRI_JP	1	30	0.554225	7.1233	3.4605	2.37734	0.00870577
SA595539	LIRI_JP	0	540	1.53246	7.21647	4.03079	2.92146	1.04042
SA595541	LIRI_JP	0	510	0.63404	6.49875	2.47722	3.83028	-0.135383
SA595543	LIRI_JP	0	1320	2.39229	7.46229	4.94528	4.00099	0.0665567
SA595545	LIRI_JP	0	930	0.583011	6.86327	3.00643	2.25601	0.529896
SA595547	LIRI_JP	0	540	0.305452	6.39984	3.11206	3.35091	0.261722
SA595549	LIRI_JP	0	720	0.295936	6.46778	3.07244	2.09982	0.423316
SA595551	LIRI_JP	0	690	0.592901	7.13016	2.79248	3.16153	0.259616
SA595553	LIRI_JP	0	540	0.384354	6.74382	3.71941	3.02477	0.401369
SA595555	LIRI_JP	0	660	0.38304	6.26546	2.80527	2.77081	0.101691
SA595557	LIRI_JP	0	540	0.303237	6.27928	3.47554	2.87605	-0.220861
SA595559	LIRI_JP	0	570	0.371824	6.65941	3.59059	2.71172	0.467436
SA595561	LIRI_JP	1	720	0.687548	6.87978	4.53907	3.00816	0.151739
SA595563	LIRI_JP	0	450	0.274363	6.74814	3.13857	1.58108	0.411341
SA595564	LIRI_JP	0	420	0.377796	6.35982	2.47335	2.16307	0.0754416
SA595566	LIRI_JP	0	420	0.393756	6.82185	2.2612	1.72188	0.610639
SA595567	LIRI_JP	0	420	0.393756	6.82185	2.2612	1.72188	0.610639
SA595569	LIRI_JP	0	420	0.393756	6.82185	2.2612	1.72188	0.610639
SA595570	LIRI_JP	0	150	1.02387	6.64011	5.54007	2.99259	-0.26741
SA595571	LIRI_JP	0	390	0.402551	5.80036	2.52597	2.14341	0.35821
SA595573	LIRI_JP	0	390	0.296328	5.87329	2.19461	1.62362	0.359363
SA595574	LIRI_JP	0	510	0.330359	6.24984	2.29452	2.74563	0.359639
SA595576	LIRI_JP	0	510	0.717259	6.79379	3.68558	3.72503	0.0333667
SA595577	LIRI_JP	0	510	0.363916	6.32363	3.53705	2.60397	0.0866973
SA595579	LIRI_JP	0	510	0.502209	7.2197	3.48982	3.23103	1.88861
SA595581	LIRI_JP	0	390	0.557119	6.53245	3.29548	2.16803	0.0918368
SA595584	LIRI_JP	0	570	2.88966	7.83981	5.60064	3.76959	1.27429
SA595585	LIRI_JP	0	90	0.312695	6.398	3.57198	2.10733	-0.1291
SA595587	LIRI_JP	0	330	0.34416	6.80157	1.83355	1.4665	0.374024
SA595588	LIRI_JP	0	330	0.397536	6.75953	3.6844	2.54157	0.291964
SA595590	LIRI_JP	0	300	0.327359	6.68733	4.02086	2.06937	-0.455006
SA595595	LIRI_JP	0	1170	0.414343	6.96527	3.77144	1.58231	0.0585773
SA595598	LIRI_JP	0	210	0.561441	6.14132	3.49294	2.66997	0.820974
SA595600	LIRI_JP	0	720	0.337388	6.66143	3.50006	3.36429	0.303954
SA595602	LIRI_JP	0	570	0.348661	6.52296	2.86801	2.61478	-0.187674
SA595606	LIRI_JP	0	210	0.285744	6.12941	2.5733	2.08961	-0.155307
SA595608	LIRI_JP	0	180	0.448258	6.29395	3.51713	1.87575	0.33233
SA595610	LIRI_JP	0	180	0.448258	6.29395	3.51713	1.87575	0.33233
GSM362947	GSE14520	1	1776	0.651023	6.38163	3.98203	2.31323	-0.167241
GSM362948	GSE14520	0	1842	0.49931	7.07047	3.80038	2.90585	-0.167755
GSM362949	GSE14520	1	546	0.711576	6.56976	2.76426	2.53434	-0.296982
GSM362950	GSE14520	0	1725	0.649493	6.83635	3.05567	2.76688	-0.157748
GSM362952	GSE14520	0	1629	0.260308	5.99284	2.08619	1.9799	-0.372169
GSM362954	GSE14520	0	165	0.627521	6.86705	3.57441	3.13787	-0.214117
GSM362956	GSE14520	1	399	0.744261	6.36016	4.42308	2.59673	-0.117074
GSM362958	GSE14520	1	846	0.957054	7.05505	3.43346	2.57402	-0.13693
GSM362959	GSE14520	1	285	0.45847	6.62499	3.29088	3.16285	-0.142641
GSM362960	GSE14520	0	1983	0.270252	6.59252	2.56661	2.33496	-0.195115
GSM362964	GSE14520	0	2022	0.360325	6.52111	2.27121	2.58164	-0.0858953
GSM362965	GSE14520	0	1998	0.643947	6.57959	3.34415	3.32153	-0.100641
GSM362966	GSE14520	0	1983	0.260139	6.07722	2.2866	2.35042	-0.245673
GSM362970	GSE14520	0	2019	0.303805	6.65852	2.98086	2.12178	-0.0457461
GSM362971	GSE14520	1	1443	0.306248	5.99355	1.99612	2.7659	-0.481913
GSM362972	GSE14520	0	1980	0.346348	6.1378	2.30534	2.08614	-0.170781
GSM362976	GSE14520	0	2010	0.40028	6.75525	2.19365	2.95516	-0.00100366
GSM362977	GSE14520	0	1989	0.343175	6.34829	2.78549	2.06862	-0.488253
GSM362978	GSE14520	1	864	0.471766	6.66106	2.44264	2.61879	-0.139097
GSM362982	GSE14520	0	1938	0.728849	6.87909	4.50679	2.88315	-0.0752172
GSM362983	GSE14520	0	1926	0.830807	6.22536	3.64349	2.71068	0.0906748
GSM362984	GSE14520	0	1542	0.317844	5.77212	2.09564	2.58753	-0.220717
GSM362986	GSE14520	0	1935	0.514805	6.62675	3.0118	3.0804	0.0672545
GSM362987	GSE14520	0	1812	0.614405	7.1904	3.3569	2.49836	-0.116732
GSM362988	GSE14520	0	1533	0.561176	6.60238	3.354	2.48654	-0.0655595
GSM362992	GSE14520	0	1929	0.322521	6.48809	4.59793	2.49025	-0.132895
GSM362993	GSE14520	0	114	0.324353	6.51035	2.62147	1.97721	-0.0654083
GSM362994	GSE14520	0	1644	0.461715	6.48011	3.14374	1.99087	-0.0667981
GSM363008	GSE14520	0	1752	0.497458	6.22949	2.54684	3.51822	0.337265
GSM363009	GSE14520	0	1767	0.922476	6.41707	3.69107	3.15457	0.28623
GSM363010	GSE14520	0	1860	0.63954	5.96816	2.05181	3.35279	0.213159
GSM363011	GSE14520	1	528	0.478136	6.80555	2.77566	3.35552	0.23399
GSM363012	GSE14520	1	135	0.489038	6.14905	2.38746	2.20169	0.379221
GSM363013	GSE14520	1	231	0.575367	6.575	3.11886	3.6548	0.132162
GSM363014	GSE14520	0	1821	0.269805	6.45877	2.42963	2.10639	-0.120769
GSM363015	GSE14520	0	1791	0.390265	6.28624	2.38368	2.70347	-0.00142949
GSM363016	GSE14520	0	60	0.432173	6.293	2.448	3.05012	-0.14329
GSM363017	GSE14520	1	381	0.924442	7.2701	3.69555	3.77468	0.275088
GSM363029	GSE14520	0	1539	0.754584	6.67848	2.8111	3.54958	0.202011
GSM363030	GSE14520	1	135	0.614443	6.727	3.26131	2.75829	0.303019
GSM363031	GSE14520	0	1584	0.543815	6.19258	4.24365	2.79271	0.573448
GSM363032	GSE14520	0	747	0.648549	6.91074	3.29059	3.5117	0.285813
GSM363033	GSE14520	1	1092	0.514445	6.22126	3.29834	3.50142	0.214038
GSM363034	GSE14520	1	1377	0.339262	6.23548	2.90252	2.58208	0.174572
GSM363035	GSE14520	0	1683	0.294512	6.0679	2.26163	2.78447	0.0893616
GSM363036	GSE14520	1	981	0.458344	6.02752	2.63084	1.93244	0.186135
GSM363037	GSE14520	0	1836	0.710056	6.91154	4.16413	2.98534	-0.00616849
GSM363038	GSE14520	1	453	0.571953	6.66375	2.74072	2.32173	-0.585866
GSM363039	GSE14520	0	1584	0.210752	6.42259	2.14506	1.8468	0.029662
GSM363048	GSE14520	1	609	0.630831	6.87302	4.0551	2.85886	0.348681
GSM363049	GSE14520	0	1872	0.395981	6.14036	3.21714	2.69183	0.0421575
GSM363050	GSE14520	0	1626	0.419317	6.51434	2.61947	2.19232	0.119615
GSM363051	GSE14520	0	618	0.481893	5.27636	4.25262	3.00245	0.413778
GSM363052	GSE14520	1	429	1.12616	6.76749	4.73807	4.42741	0.591476
GSM363053	GSE14520	0	1710	0.43463	6.2658	3.00486	2.57475	0.0157692
GSM363054	GSE14520	0	1614	0.315298	6.96385	1.72545	2.83686	-0.106162
GSM363055	GSE14520	0	219	0.52416	6.23791	2.14918	2.36446	0.209848
GSM363056	GSE14520	1	576	0.946781	6.98653	2.80404	3.19176	0.268726
GSM363057	GSE14520	1	1815	0.356289	6.57164	2.81549	2.98444	0.182161
GSM363069	GSE14520	1	408	0.595536	6.6437	3.60573	2.87019	0.178438
GSM363070	GSE14520	0	1710	0.750724	7.02746	5.09779	3.09903	1.98736
GSM363071	GSE14520	1	414	0.79132	6.91525	3.17233	2.52632	0.196736
GSM363072	GSE14520	0	312	0.448494	6.83107	3.63918	3.26927	0.169566
GSM363073	GSE14520	1	795	0.647322	6.46821	3.56998	2.79751	0.615555
GSM363074	GSE14520	0	1731	0.533934	6.27007	2.70665	3.07663	0.0666753
GSM363075	GSE14520	1	540	0.54008	6.52894	3.64927	3.13841	-0.200477
GSM363076	GSE14520	1	690	0.572892	6.24587	3.71112	2.53894	0.790622
GSM363077	GSE14520	0	1581	0.279752	6.18545	2.91531	2.3936	0.0226938
GSM363078	GSE14520	1	1737	0.768547	7.03784	3.56603	3.24343	0.294531
GSM363079	GSE14520	1	234	0.703331	6.41766	2.70589	2.63056	-0.248383
GSM363080	GSE14520	1	69	0.958486	6.56087	3.28228	3.31916	0.468028
GSM363081	GSE14520	1	156	0.837675	7.24484	3.46424	3.53707	0.116569
GSM363082	GSE14520	0	1710	0.450658	5.92805	2.36014	2.44281	0.0832738
GSM363083	GSE14520	0	1599	0.43742	5.86046	3.27402	3.16869	-0.151179
GSM363084	GSE14520	0	1878	0.48344	6.47506	2.58359	2.34932	-0.0711115
GSM363085	GSE14520	1	1644	0.487115	5.94924	2.95406	2.97736	-0.0884025
GSM363086	GSE14520	0	1815	0.324115	6.70882	3.18926	2.00073	-0.361305
GSM363087	GSE14520	0	1620	0.254898	6.00412	2.9113	2.69724	0.0499544
GSM363098	GSE14520	0	1707	0.476956	5.93707	3.90849	3.22737	0.575915
GSM363099	GSE14520	1	927	0.977021	6.39965	3.20562	3.54317	0.715743
GSM363100	GSE14520	1	102	0.932272	6.23863	3.56855	3.17589	0.093117
GSM363101	GSE14520	0	1689	0.23934	6.20141	3.13687	2.85882	-0.11556
GSM363102	GSE14520	1	1137	0.419574	7.09411	2.54278	2.29706	-0.0417697
GSM363104	GSE14520	1	1077	0.28425	6.22197	1.97925	2.29751	0.165288
GSM363105	GSE14520	0	285	0.864786	6.31314	3.39278	3.15714	-0.0610187
GSM363106	GSE14520	1	438	0.415516	6.44493	2.67822	2.92324	0.168186
GSM363107	GSE14520	1	210	0.321228	6.35164	2.65106	2.88958	-0.230715
GSM363108	GSE14520	0	1464	0.414861	6.04674	2.43306	2.63191	-0.0625714
GSM363109	GSE14520	0	1656	0.859827	7.43223	5.38486	3.53759	0.74178
GSM363115	GSE14520	0	1998	0.349789	6.36389	2.75865	2.73431	-0.330942
GSM363121	GSE14520	0	1536	0.83814	6.66235	2.98646	3.94455	-0.395747
GSM363122	GSE14520	0	1662	0.288023	5.43959	3.48527	2.43562	0.00417284
GSM363123	GSE14520	0	1281	0.662407	6.88753	3.81693	2.5466	0.0985714
GSM363124	GSE14520	0	1605	0.235566	6.25011	2.14566	2.71293	-0.158681
GSM363125	GSE14520	1	495	0.434639	6.44571	2.32342	3.34357	-0.186058
GSM363126	GSE14520	0	1785	0.574028	6.31972	2.78902	2.35561	-0.11393
GSM363127	GSE14520	1	666	1.03419	6.98152	4.74699	3.39444	0.169524
GSM363128	GSE14520	1	903	0.747528	6.93136	2.31056	2.72116	1.80461
GSM363129	GSE14520	1	105	0.619848	6.18732	3.82523	3.04756	-0.164353
GSM363130	GSE14520	0	1854	0.235658	6.19025	2.00192	1.91172	-0.0130446
GSM363142	GSE14520	1	1383	0.428324	6.46603	3.38357	2.68953	0.140209
GSM363143	GSE14520	1	978	0.920679	6.80505	2.69415	3.37866	0.00375601
GSM363144	GSE14520	0	1533	0.458698	6.93561	2.88014	2.84348	0.0235715
GSM363145	GSE14520	1	990	0.49803	5.33618	3.32965	3.11963	0.0521106
GSM363146	GSE14520	0	1647	0.643914	6.33212	3.57814	3.96047	-0.0272588
GSM363147	GSE14520	1	861	0.380914	6.47938	3.08881	2.73334	-0.0704282
GSM363148	GSE14520	0	1572	0.379018	6.14428	2.21127	2.65178	-0.000478642
GSM363149	GSE14520	0	432	0.396092	6.74294	3.28441	2.29015	-0.200274
GSM363150	GSE14520	1	99	0.657682	6.34084	4.89387	3.52449	0.0576993
GSM363151	GSE14520	0	2013	0.610603	6.76623	3.19088	2.13454	0.0463052
GSM363152	GSE14520	1	249	0.237063	6.56852	2.64211	1.84498	-0.257932
GSM363164	GSE14520	0	1656	0.236571	6.49014	2.68629	1.9088	0.0819541
GSM363166	GSE14520	0	1614	0.354785	6.61978	3.02612	2.45888	-0.22961
GSM363168	GSE14520	0	1614	0.292174	6.41056	2.05981	1.62983	0.0679552
GSM363169	GSE14520	0	1182	0.877375	6.91882	3.87741	3.16404	0.269389
GSM363170	GSE14520	0	1599	0.768211	7.2061	4.18688	3.02469	0.641255
GSM363172	GSE14520	1	201	0.607945	6.37626	2.85015	3.15419	0.0398781
GSM363174	GSE14520	0	2013	0.278165	6.27194	2.86162	2.88712	-0.243605
GSM363176	GSE14520	0	1521	0.389792	6.47363	2.27539	2.94914	0.223647
GSM363178	GSE14520	0	1719	0.440598	6.22977	2.62351	2.3443	0.047482
GSM363180	GSE14520	1	1413	0.442657	6.30847	2.48799	2.85595	-0.163991
GSM363182	GSE14520	0	1581	0.388151	6.15322	2.86254	1.96668	-0.184289
GSM363184	GSE14520	0	489	0.960958	7.40083	3.96175	2.98253	-0.128969
GSM363186	GSE14520	1	228	0.306559	5.95128	1.98064	2.59662	-0.288585
GSM363188	GSE14520	0	1719	0.345975	6.35576	2.71444	2.79427	-0.221388
GSM363190	GSE14520	0	144	0.801559	7.08426	4.0082	3.46325	0.0619411
GSM363192	GSE14520	0	1566	0.787088	7.08561	3.07909	2.3393	0.0482488
GSM363194	GSE14520	0	135	0.704459	7.10162	4.65734	4.01614	0.257997
GSM363196	GSE14520	0	1731	0.451799	6.62036	2.38204	3.24735	0.161475
GSM363198	GSE14520	0	1737	0.469149	6.97158	2.8659	2.58357	-0.18605
GSM363200	GSE14520	1	717	0.569047	6.40673	3.08484	2.83197	-0.166332
GSM363202	GSE14520	0	1800	0.388434	6.41104	2.32159	2.10426	-0.195002
GSM363204	GSE14520	1	423	0.451244	6.43823	2.82348	2.28889	0.0992041
GSM363205	GSE14520	0	1740	0.209632	5.87409	2.40336	2.62602	-0.170502
GSM363207	GSE14520	1	1599	0.73069	6.61622	3.41331	3.10974	0.196709
GSM363209	GSE14520	0	1824	0.226596	6.51525	2.54766	2.91789	-0.179521
GSM363211	GSE14520	1	267	0.600217	6.42279	2.78989	2.90202	0.0208578
GSM363213	GSE14520	0	1728	0.265669	6.81264	2.4596	2.2881	-0.0314731
GSM363215	GSE14520	0	558	0.437114	6.37863	2.93258	2.95994	-0.00836402
GSM363217	GSE14520	0	1635	0.274469	6.32372	3.44105	2.05051	-0.300766
GSM363218	GSE14520	1	456	0.771968	6.47083	4.19011	3.54912	0.171913
GSM363220	GSE14520	0	1626	0.777337	6.73581	2.96541	3.44325	0.443973
GSM363222	GSE14520	0	1452	0.528035	7.02211	3.85982	2.86041	-0.210635
GSM363224	GSE14520	0	1737	0.384405	6.62711	2.65112	2.297	-0.323799
GSM363226	GSE14520	0	1812	0.318602	6.47292	2.29125	2.2353	-0.0850969
GSM363230	GSE14520	0	144	0.342518	6.8718	3.01685	2.01903	-0.0279809
GSM363232	GSE14520	0	1737	0.226504	6.33232	2.48873	3.15263	0.187211
GSM363235	GSE14520	0	984	1.03401	7.4405	4.88837	4.20906	0.210024
GSM363237	GSE14520	0	1725	0.734474	6.90615	4.17967	3.73663	0.32708
GSM363239	GSE14520	1	1266	0.436206	6.32893	2.80516	2.59837	-0.0242078
GSM363241	GSE14520	0	1626	0.244887	6.48456	2.55084	2.23954	0.142063
GSM363243	GSE14520	0	1674	0.259537	5.92668	2.07903	3.05723	-0.0514309
GSM363245	GSE14520	0	1725	1.03649	6.76734	5.13906	3.43288	0.148253
GSM363247	GSE14520	0	1587	0.398371	6.81007	2.74466	2.41915	-0.0277825
GSM363249	GSE14520	0	1776	0.349497	6.40942	3.11046	2.33077	0.0462987
GSM363251	GSE14520	1	588	0.914023	6.66351	2.61852	2.26901	0.0908557
GSM363263	GSE14520	1	90	1.08145	6.5864	3.76683	3.11929	0.0661395
GSM363264	GSE14520	1	534	0.688372	6.35805	2.93922	3.14454	0.106591
GSM363265	GSE14520	0	1953	0.289971	6.01772	2.66587	3.1853	0.0789754
GSM363266	GSE14520	1	75	0.657526	7.05677	3.30962	2.61223	0.273013
GSM363267	GSE14520	1	1437	0.499131	6.36417	3.36149	2.94681	0.153644
GSM363268	GSE14520	0	1680	0.947488	6.4512	5.22485	3.59734	0.205707
GSM363269	GSE14520	1	1581	0.289277	6.09324	2.81947	1.87965	-0.167426
GSM363270	GSE14520	1	639	0.342535	6.70815	2.88958	2.56201	-0.2649
GSM363271	GSE14520	0	861	1.04143	6.52136	3.78131	3.81702	0.0472069
GSM363272	GSE14520	0	1689	0.258623	6.72351	2.16361	2.83266	0.562182
GSM363273	GSE14520	0	1740	0.356582	6.06085	2.37072	2.76096	-0.0919428
GSM363274	GSE14520	1	807	0.341452	6.49375	2.63854	2.86073	-0.0475471
GSM363275	GSE14520	0	1794	0.4091	5.94695	2.31428	2.77237	0.136865
GSM363288	GSE14520	0	1809	0.275048	6.06131	2.66784	2.45573	-0.170961
GSM363289	GSE14520	0	1626	0.312265	6.27122	3.0702	2.06036	-0.178371
GSM363290	GSE14520	0	1641	0.325119	6.4279	2.58771	2.58786	-0.220525
GSM363291	GSE14520	1	1503	0.478318	6.47161	2.61414	2.93838	-0.216798
GSM363292	GSE14520	0	1797	0.332485	6.05553	3.60021	2.75519	0.0542907
GSM363293	GSE14520	0	1845	0.433953	6.48838	2.63163	2.73932	0.0616931
GSM363294	GSE14520	0	1878	0.335611	6.20568	2.5842	3.07786	-0.0577935
GSM363295	GSE14520	0	1647	0.273261	6.4905	2.84711	2.51428	0.109627
GSM363296	GSE14520	1	825	0.682406	6.51384	3.08336	2.65744	-0.0450926
GSM363297	GSE14520	0	90	0.803044	6.4721	3.68144	3.68704	0.282247
GSM363298	GSE14520	0	1608	0.378269	6.53025	2.2746	2.69248	0.0852341
GSM363309	GSE14520	1	1590	0.577629	6.34636	3.93587	3.22446	0.279661
GSM363310	GSE14520	1	705	0.815191	6.43132	3.85176	2.83043	-0.017437
GSM363311	GSE14520	0	570	0.452588	6.58679	2.98438	2.59666	0.0970581
GSM363312	GSE14520	0	1659	0.224952	6.23562	2.8788	2.39208	-0.211841
GSM363313	GSE14520	0	1098	0.260157	6.40154	3.28741	2.77811	0.0497353
GSM363314	GSE14520	0	1713	0.386868	6.25493	3.07966	3.40816	-0.0641708
GSM363315	GSE14520	0	1962	0.22083	6.14963	2.59164	2.29797	0.0914306
GSM363316	GSE14520	0	1641	0.25149	6.18092	3.48102	1.85514	-0.171614
GSM363317	GSE14520	0	1884	0.817162	7.1593	4.48843	3.61306	0.0585515
GSM363326	GSE14520	1	1116	0.863705	6.51668	3.07191	3.22855	-0.0548118
GSM363327	GSE14520	0	1803	0.348031	6.64439	3.23048	2.3881	0.0303955
GSM363328	GSE14520	1	360	0.882016	7.10977	3.14775	3.029	0.7323
GSM363329	GSE14520	0	1596	0.335183	6.33466	3.05246	2.6357	0.19341
GSM363330	GSE14520	1	378	0.699048	6.53441	3.5669	3.75124	0.281305
GSM363331	GSE14520	1	1095	0.889132	7.32204	3.62551	3.15518	1.2039
GSM363332	GSE14520	1	378	0.457597	6.54865	3.95765	2.54757	-0.0492342
GSM363333	GSE14520	1	405	0.690903	6.6038	2.55698	3.14384	0.151097
GSM363335	GSE14520	0	1782	0.306559	5.84958	1.97357	2.46986	-0.0359311
GSM363336	GSE14520	1	240	0.359278	6.52097	2.34502	2.4973	0.0392248
GSM363337	GSE14520	0	1965	0.475511	5.93692	2.46223	2.94823	0.0929382
GSM363339	GSE14520	0	1962	0.672947	6.49582	3.82067	3.20078	-0.313718
GSM363341	GSE14520	0	1962	0.529836	6.41582	3.51189	3.46529	0.105378
GSM363343	GSE14520	0	1953	0.217206	5.38692	2.59383	2.39462	-0.194463
GSM363344	GSE14520	0	1161	0.286395	6.39918	2.53952	1.96783	-0.0614644
GSM363346	GSE14520	1	429	0.772063	6.76507	2.85466	2.69269	-0.286256
GSM363348	GSE14520	0	429	0.506467	6.25175	3.63053	3.08309	0.316387
GSM363350	GSE14520	0	1887	0.984711	6.49588	3.37607	2.90652	0.25271
GSM363352	GSE14520	1	486	0.747871	6.71428	2.53411	3.88027	0.136505
GSM363354	GSE14520	1	312	0.616964	7.10665	5.1593	3.59853	0.432696
GSM363355	GSE14520	1	273	0.896322	6.89585	3.83173	2.93302	-0.077293
GSM363357	GSE14520	1	264	0.481089	6.21489	3.25103	2.78823	0.110654
GSM363358	GSE14520	0	1617	0.733238	7.29804	3.20953	2.63538	0.218676
GSM363360	GSE14520	0	1599	0.272545	6.37089	2.56437	1.98737	-0.102584
GSM363362	GSE14520	1	174	0.384202	6.18904	2.40334	2.64177	0.283502
GSM363364	GSE14520	1	813	0.222226	5.8749	2.14423	2.6352	0.157206
GSM363366	GSE14520	0	1569	0.25006	6.35931	2.58424	2.03917	-0.433366
GSM363368	GSE14520	1	462	0.392964	6.89819	3.08477	2.66875	-0.605662
GSM363371	GSE14520	0	1989	0.245042	6.49502	3.2691	2.53648	0.229709
GSM363376	GSE14520	0	1845	0.570103	6.65682	3.09723	3.07232	0.422825
GSM363378	GSE14520	1	957	0.317433	5.80866	2.74233	1.95467	-0.0714061
GSM363384	GSE14520	1	1548	0.585415	6.70918	4.29842	3.05119	0.680977
GSM363386	GSE14520	1	300	0.745436	6.25009	3.03181	3.06166	-0.197751
GSM363388	GSE14520	0	1719	0.720305	6.61541	2.82362	4.37947	0.0176061
GSM363391	GSE14520	0	1719	0.268153	6.33148	2.51803	3.04773	-0.0789582
GSM363393	GSE14520	1	120	0.510856	5.56883	2.29304	3.02914	-0.0771847
GSM363400	GSE14520	0	1668	0.502126	6.50125	3.21035	2.27484	0.269054
GSM363404	GSE14520	1	360	0.729544	6.13021	2.83054	2.27772	-0.140002
GSM363420	GSE14520	1	219	0.8222	6.78157	4.05069	3.48038	-0.131495
GSM363422	GSE14520	0	1548	0.92351	7.84837	3.74225	3.19444	1.69441
GSM363424	GSE14520	0	1914	0.316637	6.39654	2.14616	2.02585	-0.322905
GSM363426	GSE14520	1	54	0.453742	6.37577	2.54312	2.32291	-0.116211
GSM363428	GSE14520	1	114	0.449887	6.47287	2.88969	3.34819	-0.102219
GSM363430	GSE14520	1	111	1.2753	6.3141	3.10315	2.52643	-0.320905
GSM363432	GSE14520	1	1032	0.527496	6.79821	2.5963	2.07245	-0.226551
GSM363436	GSE14520	1	114	0.475363	5.98732	2.72067	2.08878	-0.237925
GSM363438	GSE14520	0	1698	0.520762	6.68962	3.34822	2.78344	0.159401
GSM363440	GSE14520	0	1665	0.571721	7.03797	2.48742	2.01611	-0.148986
GSM363442	GSE14520	1	138	0.641057	6.25466	3.16693	2.89004	-0.0745562
GSM363444	GSE14520	1	219	0.53256	6.41538	2.64606	2.96844	-0.125466
GSM363446	GSE14520	0	1563	0.637816	6.69061	2.68125	2.96154	-0.247757
GSM363448	GSE14520	0	1551	0.4453	5.74635	2.49416	2.40493	-0.155224
GSM712542	GSE14520	1	225	0.389628	5.75247	4.35668	3.544	-0.0359038

## Sheet: Table S9
Table S9 The result of Gene set variation analysis
Sample	N_GLYCAN_BIOSYNTHESIS	OTHER_GLYCAN_DEGRADATION	O_GLYCAN_BIOSYNTHESIS	GLYCOSAMINOGLYCAN_DEGRADATION	GLYCOSAMINOGLYCAN_BIOSYNTHESIS_KERATAN_SULFATE	GLYCEROLIPID_METABOLISM	GLYCOSYLPHOSPHATIDYLINOSITOL_GPI_ANCHOR_BIOSYNTHESIS	GLYCEROPHOSPHOLIPID_METABOLISM	ETHER_LIPID_METABOLISM	ARACHIDONIC_ACID_METABOLISM	LINOLEIC_ACID_METABOLISM	ALPHA_LINOLENIC_ACID_METABOLISM	SPHINGOLIPID_METABOLISM	GLYCOSPHINGOLIPID_BIOSYNTHESIS_LACTO_AND_NEOLACTO_SERIES	GLYCOSPHINGOLIPID_BIOSYNTHESIS_GLOBO_SERIES	GLYCOSPHINGOLIPID_BIOSYNTHESIS_GANGLIO_SERIES	RIBOFLAVIN_METABOLISM	NICOTINATE_AND_NICOTINAMIDE_METABOLISM	PANTOTHENATE_AND_COA_BIOSYNTHESIS	AMINOACYL_TRNA_BIOSYNTHESIS	BASAL_TRANSCRIPTION_FACTORS	NON_HOMOLOGOUS_END_JOINING	SNARE_INTERACTIONS_IN_VESICULAR_TRANSPORT	LYSOSOME	CARDIAC_MUSCLE_CONTRACTION	RENIN_ANGIOTENSIN_SYSTEM	CIRCADIAN_RHYTHM_MAMMAL	TASTE_TRANSDUCTION	PROXIMAL_TUBULE_BICARBONATE_RECLAMATION	PATHOGENIC_ESCHERICHIA_COLI_INFECTION	SYSTEMIC_LUPUS_ERYTHEMATOSUS	PRIMARY_IMMUNODEFICIENCY	HYPERTROPHIC_CARDIOMYOPATHY_HCM	ARRHYTHMOGENIC_RIGHT_VENTRICULAR_CARDIOMYOPATHY_ARVC	DILATED_CARDIOMYOPATHY	GLYCOLYSIS_GLUCONEOGENESIS	CITRATE_CYCLE_TCA_CYCLE	PENTOSE_PHOSPHATE_PATHWAY	PENTOSE_AND_GLUCURONATE_INTERCONVERSIONS	FRUCTOSE_AND_MANNOSE_METABOLISM	GALACTOSE_METABOLISM	ASCORBATE_AND_ALDARATE_METABOLISM	FATTY_ACID_METABOLISM	STEROID_BIOSYNTHESIS	PRIMARY_BILE_ACID_BIOSYNTHESIS	STEROID_HORMONE_BIOSYNTHESIS	OXIDATIVE_PHOSPHORYLATION	PURINE_METABOLISM	PYRIMIDINE_METABOLISM
TCGA-2Y-A9GS-01	0.312997	0.472125	0.0408399	0.267099	0.083137	0.12478	0.265767	0.174276	0.0192067	0.0503835	-0.226203	-0.0321472	0.0578432	0.00666097	0.214286	-0.000309024	-0.0386228	0.313053	0.522743	0.559797	0.366987	0.529102	0.522345	0.38347	-0.299941	-0.179208	0.193359	-0.189627	-0.415771	0.47166	0.189886	0.00734433	0.227287	0.293865	0.147654	0.315443	0.433529	0.512924	0.526102	0.367675	0.408869	0.540674	0.428377	-0.426078	0.420004	0.142191	-0.306116	0.290701	0.395197
TCGA-2Y-A9GT-01	-0.185568	-0.195255	0.309393	-0.348881	-0.400779	0.238226	-0.431763	0.0744412	0.173516	0.254016	0.457865	0.580517	-0.139881	-0.19072	-0.134538	-0.115034	-0.426222	0.0806464	-0.215175	-0.748755	-0.37634	-0.497618	-0.309838	-0.151114	-0.385981	-0.0463148	0.337289	0.383828	0.157902	-0.344197	0.187009	0.561285	0.0635121	0.0653614	0.167459	-0.0624643	-0.290865	-0.304673	0.00480721	-0.183316	-0.110925	0.0866794	0.33254	-0.454963	0.544773	0.213649	-0.643223	-0.242452	-0.427224
TCGA-2Y-A9GU-01	-0.0212515	0.0510657	0.0809461	-0.0929936	-0.339032	-0.0103435	-0.33731	0.0308877	0.281679	-0.0699365	0.33349	0.556226	-0.241561	-0.268035	-0.345478	-0.000109206	0.0595032	0.0261223	0.240214	-0.319133	-0.155547	-0.411961	-0.142662	-0.302225	0.328511	-0.0263699	0.319848	0.257544	0.277587	-0.443534	-0.149254	-0.4651	-0.179672	-0.183044	-0.0604116	0.245444	0.570828	0.0564246	-0.041951	-0.100428	0.288016	0.108759	0.599948	-0.427328	0.222156	0.103833	0.399986	-0.252352	-0.428825
TCGA-2Y-A9GV-01	0.0973243	0.28465	0.174737	-0.196594	-0.23624	0.251716	-0.20639	0.0100047	0.10774	0.137763	0.334953	0.341354	0.144099	0.0281565	-0.24618	0.338085	0.0481804	0.295678	0.358256	-0.428187	-0.100399	-0.282888	0.141547	-0.0797706	-0.423883	0.465526	0.41308	0.173717	-0.224666	-0.149171	-0.093547	0.291443	-0.0806084	-0.0670584	-0.0873302	0.00275383	-0.305935	0.0159477	-0.162312	0.197877	0.090325	-0.285837	0.211458	0.19852	0.420968	-0.0805745	-0.599748	-0.268113	-0.341615
TCGA-2Y-A9GW-01	-0.480168	-0.14447	0.178553	-0.273632	-0.00121446	0.074509	-0.564746	0.244924	0.352898	0.377715	0.460598	0.465575	-0.193767	0.201307	0.557194	0.260047	-0.178948	-0.123646	-0.330892	-0.497965	-0.334981	-0.503863	0.00469154	0.0335285	0.119599	-0.144751	-0.213985	0.182324	0.119375	-0.0794245	-0.0600341	0.448684	0.42943	0.20464	0.450147	-0.171615	-0.29804	-0.159104	0.24801	0.00443569	0.0767022	0.330164	-0.530785	-0.294043	0.0849867	0.314796	-0.355166	-0.169512	-0.40854
TCGA-2Y-A9GX-01	-0.240163	0.267649	0.533527	0.242864	0.3795	0.180312	-0.499011	0.0680535	0.190485	0.202997	0.094196	0.037884	0.263087	0.0218477	0.372866	0.412004	0.00304891	0.322344	0.103143	-0.00998523	-0.0587413	-0.198281	0.0916373	0.294852	-0.0890639	0.0938341	0.516518	-0.00680146	0.281315	0.245684	-0.216723	0.574825	0.515009	0.469773	0.515457	0.238595	0.00582243	-0.0456952	0.38425	0.0142728	0.162432	0.572932	0.105265	-0.679901	0.291432	0.130663	-0.567391	-0.0427371	-0.224906
TCGA-2Y-A9GY-01	0.205715	0.507006	-0.173239	-0.154515	0.295336	-0.257593	0.462095	-0.00707643	0.0131398	-0.10339	-0.452955	-0.214319	0.0406047	-0.0431101	0.255101	0.370627	0.379667	0.000321108	0.183813	0.441996	0.353936	0.405215	0.29732	0.266655	-0.0816379	-0.00898037	-0.524508	0.030027	-0.524924	0.470311	0.304357	0.600995	-0.157081	-0.293111	-0.278937	-0.185944	-0.426239	0.292731	0.0971069	0.24839	0.4152	-0.00513684	-0.632316	-0.518626	-0.708323	-0.320987	-0.019417	0.207688	0.32609
TCGA-2Y-A9GZ-01	0.0463563	-0.175681	-0.147237	-0.277279	-0.183256	0.188951	0.127072	-0.11786	-0.238255	-0.0521375	0.284673	0.014463	-0.233087	-0.300539	-0.346777	-0.441368	-0.173652	0.330605	0.13192	-0.448628	-0.297942	0.231899	-0.400581	-0.368862	-0.523264	0.180191	0.40487	0.0645161	0.0806518	-0.502081	-0.420335	-0.58797	-0.505806	-0.480813	-0.491177	0.0611033	0.0467883	-0.153039	0.229477	-0.132598	0.147303	0.344812	0.375262	0.37731	0.623212	0.222749	-0.554386	-0.25393	-0.212116
TCGA-2Y-A9H0-01	0.115584	-0.0209801	-0.263342	0.0333494	-0.1412	-0.0634908	0.131802	-0.146303	-0.154692	-0.15234	-0.213308	-0.318407	0.295406	0.0649498	-0.202382	-0.00479784	0.59048	-0.0549031	0.126695	0.140731	0.341634	-0.0890229	0.060966	0.137621	-0.069417	0.0353167	-0.0846711	-0.223204	-0.0514272	0.179097	0.244233	0.496465	-0.238083	-0.217943	-0.234169	0.112345	0.138645	0.4411	0.253759	0.392426	0.379666	0.0742434	-0.518058	0.242973	-0.0687779	0.0947781	0.0492769	0.0323884	0.10658
TCGA-2Y-A9H1-01	-0.505481	-0.571252	-0.343015	-0.46153	-0.537076	-0.28339	-0.508469	-0.193419	-0.291192	0.150587	0.26447	0.00934948	-0.570982	-0.0182758	-0.295094	0.0532463	-0.525034	-0.166889	-0.0672099	-0.489538	-0.640691	-0.588487	-0.337882	-0.333969	0.107753	-0.387139	-0.748932	-0.108187	-0.181248	-0.40778	-0.0193632	0.144317	-0.430615	-0.566356	-0.449063	-0.171277	-0.417157	-0.352571	0.0982191	-0.369026	-0.326031	0.213352	0.102486	-0.198807	0.372992	0.423539	0.33268	-0.247272	-0.245676
TCGA-2Y-A9H2-01	-0.390083	-0.52562	0.12946	-0.307539	0.326505	-0.203419	0.116062	0.109915	0.0786173	-0.178416	-0.283498	0.0163667	-0.144206	0.0722769	0.00391332	-0.451828	-0.166594	-0.226973	-0.600392	0.140876	0.0527825	0.486122	0.294362	-0.16011	0.00557982	-0.521337	0.312996	0.264283	-0.117862	0.207148	-0.0605965	0.422922	0.150524	0.130356	0.187192	-0.370339	-0.465002	-0.432021	-0.619314	-0.179477	-0.415255	-0.599343	-0.658035	-0.700039	-0.661321	-0.497778	-0.223256	-0.0412533	0.122262
TCGA-2Y-A9H3-01	-0.531866	-0.423472	0.15015	-0.389446	-0.181626	-0.193709	-0.613854	-0.0572575	0.0420547	0.0777316	0.0578354	-0.0676838	-0.415662	-0.236692	0.033181	-0.112298	-0.163573	-0.210369	-0.265409	-0.506402	-0.559516	-0.469231	-0.191966	-0.140908	0.531087	0.0994011	-0.547718	0.192524	0.00488267	-0.227888	-0.137676	0.506673	0.0802921	-0.168187	0.15709	-0.250584	-0.132841	-0.230666	-0.565964	-0.115115	-0.00130826	-0.602616	-0.461805	-0.611247	-0.426369	-0.239615	0.504977	-0.205355	-0.506331
TCGA-2Y-A9H4-01	-0.373815	-0.623117	-0.367083	-0.250505	-0.351372	0.0818299	-0.119815	-0.332333	-0.362398	-0.0972966	-0.201061	-0.447975	-0.383272	-0.209424	-0.429406	-0.213746	0.107142	-0.210149	0.101205	-0.0337246	0.0620226	-0.0816883	0.00962649	-0.298273	0.08973	0.085026	-0.289085	-0.155497	0.0600441	-0.467872	-0.147944	-0.18107	-0.414082	-0.47602	-0.450933	-0.0439025	-0.117504	0.186117	0.0918221	-0.25278	-0.137805	0.238276	0.258475	0.125143	0.546663	0.186883	0.240349	-0.10341	0.00582536
TCGA-2Y-A9H5-01	-0.0343974	0.159905	0.0570169	-0.200711	0.194648	-0.0391686	-0.0273053	0.20568	0.262911	-0.0259471	0.23989	0.25911	0.263596	0.289756	-0.0130777	-0.436801	0.391893	-0.121346	0.124722	-0.105654	0.0333841	0.116811	0.267838	-0.0111123	-0.166913	-0.324303	0.578455	0.157649	0.0920204	0.180718	-0.311336	0.295047	0.431896	0.375353	0.440653	-0.160944	-0.395756	-0.373812	-0.351428	-0.00334005	-0.380937	-0.426767	0.0139499	0.262794	-0.394217	-0.414214	-0.587822	-0.0122884	-0.260356
TCGA-2Y-A9H6-01	-0.213732	0.0878483	0.331389	-0.1123	-0.0788279	0.180056	-0.442703	0.126337	0.374075	0.398862	0.448147	0.521665	-0.213913	0.115936	-0.111164	0.421387	-0.232785	-0.212953	-0.263971	-0.423415	-0.330326	-0.209631	0.147012	-0.23464	0.227452	0.0998245	-0.0565342	0.355199	-0.0808	-0.105524	0.321022	0.323442	0.370359	0.253597	0.415052	-0.197595	-0.160176	-0.389869	-0.076337	-0.110395	-0.0215495	-0.0509206	0.24459	-0.595847	-0.343026	0.00280845	-0.0113984	-0.160372	-0.437771
TCGA-2Y-A9H7-01	0.0272792	-0.148312	-0.204438	-0.279403	0.0835209	-0.108883	-0.112733	-0.17276	-0.163085	-0.183863	-0.35439	-0.114463	-0.158833	-0.124956	-0.466213	-0.0416286	0.225675	-0.38824	0.180312	-0.0698001	-0.0362874	-0.246816	-0.254671	-0.374489	-0.209301	-0.234564	-0.561164	-0.165087	-0.194024	-0.162178	0.361107	0.238294	-0.195106	-0.158237	-0.144764	-0.253482	-0.326361	-0.506666	-0.456887	-0.38211	-0.320827	-0.469093	0.0403318	0.573192	-0.444107	-0.308819	-0.0219215	-0.0256909	0.0707684
TCGA-2Y-A9H8-01	0.117686	0.322149	0.0132264	0.0027596	0.104505	0.0713084	0.126604	0.0808316	-0.0162416	-0.185583	-0.0416356	0.186118	-0.0188197	-0.334206	-0.016001	-0.0853353	-0.128694	-0.32717	0.265944	-0.166811	-0.15019	-0.0239159	-0.176336	0.0865602	-0.361545	-0.098746	-0.00320608	0.154512	-0.107959	-0.353837	-0.140821	0.369556	-0.343936	-0.413426	-0.350665	-0.142966	-0.00366942	-0.177435	-0.422418	-0.012985	0.131666	-0.543728	0.0224095	0.495814	-0.216029	-0.443926	-0.345979	-0.307712	-0.299163
TCGA-2Y-A9H9-01	0.130268	0.136249	-0.376614	-0.124438	-0.303996	0.0337069	-0.0562846	-0.249934	-0.24122	-0.116924	0.138825	-0.0513804	-0.457046	-0.482089	-0.351277	-0.139156	-0.336749	0.0722851	-0.102068	-0.358019	-0.325485	-0.385555	0.0395455	-0.0790203	-0.0914698	-0.220333	-0.188448	0.140004	0.00184522	-0.237375	-0.361734	-0.418724	-0.304863	-0.259831	-0.28942	0.157355	0.419911	-0.0326089	-0.290719	0.0135543	-0.0714658	-0.121198	0.347475	0.394507	0.367067	0.130991	0.254579	-0.182999	0.034398
TCGA-2Y-A9HA-01	0.204049	0.36163	-0.00390719	0.271016	-0.287096	0.352477	0.0468281	-0.0347815	-0.190672	-0.20877	-0.0832931	-0.292251	-0.088884	-0.292639	0.345786	-0.010865	-0.339457	-0.267194	0.0344686	0.410569	0.277382	0.249271	-0.250644	0.078006	-0.144011	0.0663299	0.426066	-0.22717	0.172968	-0.0625467	-0.273983	-0.54883	-0.190085	0.0175249	-0.225393	0.353528	0.505115	0.226139	0.551797	0.0803037	0.180661	0.61175	0.415985	0.540575	0.45997	0.422185	0.183984	0.0545014	-0.059384
TCGA-2Y-A9HB-01	-0.338716	0.394085	-0.0590182	0.328117	-0.0874489	0.191801	-0.25633	0.0498661	0.270312	0.136686	0.455049	0.296047	-0.34016	-0.196942	-0.173646	-0.00762623	-0.124571	0.472087	0.315211	0.322814	0.0703613	-0.276905	-0.0396046	0.226695	0.0806474	0.280036	0.0571968	-0.101089	-0.0112272	-0.274976	-0.229801	0.466992	-0.0837796	-0.164317	-0.0838624	0.260034	0.741693	-0.0187775	0.254733	0.014453	0.303751	0.454464	0.636843	0.483444	0.270643	0.280619	0.362809	-0.100512	-0.187118
TCGA-3K-AAZ8-01	0.302202	0.525967	-0.189872	0.067525	-0.101523	0.0994622	0.437202	0.0314087	-0.0921052	-0.0167548	0.0908656	-0.0677896	-0.0414874	-0.148798	-0.335398	0.177347	-0.302966	0.176301	0.126126	0.572775	0.211603	0.0263351	0.339323	0.206949	-0.385472	0.00720071	0.0146482	-0.136023	-0.206269	-0.173468	0.143573	0.340565	-0.353298	-0.317305	-0.344052	0.202497	0.43426	0.044519	0.363839	-0.0300013	-0.0366556	0.51723	0.612002	0.604036	0.619487	0.511324	0.106351	-0.0186547	0.213185
TCGA-4R-AA8I-01	0.0891683	0.164761	0.170042	-0.131438	-0.101149	0.0362174	0.148227	-0.136679	-0.109596	0.144832	0.292998	0.0213123	0.0895294	-0.0482778	-0.13318	0.407308	-0.00698759	0.113044	0.07644	0.277342	0.0521256	0.154872	-0.0701985	-0.0101766	-0.321525	-0.123923	-0.505708	0.0865467	-0.386943	-0.280062	0.201328	-0.500219	-0.0488727	-0.126926	-0.13854	0.195677	0.0172102	-0.268217	0.157382	0.0984304	-0.0986115	0.447165	0.333084	-0.741046	0.171688	0.178348	-0.323194	-0.22859	-0.197344
TCGA-5C-A9VG-01	0.230972	-0.254458	0.151535	-0.0330471	0.122729	0.0630527	0.231844	0.0670811	-0.0826665	-0.242328	-0.376069	-0.253179	-0.3496	-0.399168	-0.353122	0.0267966	0.406713	-0.037308	-0.164638	0.662705	0.548118	0.447446	0.269988	-0.217563	0.302596	0.0772657	-0.181978	0.110938	0.0182268	0.0822484	-0.320625	-0.534081	0.163178	0.119077	0.18411	-0.10586	0.507082	-0.0768526	-0.57153	-0.000509444	0.0489065	-0.580778	-0.105564	-0.090755	-0.647317	-0.51828	0.418475	0.262442	0.282411
TCGA-5C-A9VH-01	-0.181054	0.30436	0.114153	-0.0497401	0.0211203	-0.0594582	0.105979	0.271108	0.17798	0.010577	0.143407	0.16897	-0.0575542	0.0063589	-0.0243729	-0.309768	0.031135	-0.372474	-0.322359	-0.0734536	0.0180974	0.155869	0.278204	0.0891157	0.0300899	-0.254353	-0.0103831	0.0294853	-0.0157272	0.359919	-0.475802	-0.264556	0.364375	0.386392	0.392689	-0.333143	-0.324406	-0.333761	-0.00748903	-0.303093	-0.317874	0.143475	-0.245684	-0.234771	-0.414136	-0.22458	-0.269882	0.0894957	0.0380856
TCGA-5C-AAPD-01	0.0305735	-0.258738	-0.155487	-0.294464	0.136286	-0.114969	0.0500754	7.61e-05	0.161946	0.235937	0.0769391	0.173173	-0.143556	0.0669302	0.228936	-0.0378679	-0.0770894	-0.163322	-0.0882407	-0.18473	0.0707116	-0.308418	0.391241	0.0738542	0.23999	-0.269985	-0.317487	0.220917	-0.336656	0.278906	0.4747	0.637245	0.213287	0.0826255	0.293418	-0.149051	-0.404036	0.41414	-0.452976	0.285323	0.236244	-0.534893	-0.433979	-0.279553	-0.518982	-0.360013	0.095707	0.0836976	0.179014
TCGA-5R-AA1C-01	0.375516	0.329965	0.0785981	0.161716	-0.386621	-0.132802	0.479464	-0.180776	-0.256218	-0.100129	-0.181644	-0.54337	0.0989088	-0.381441	-0.00201187	0.0947832	0.102267	0.333607	-0.00656728	0.622243	0.518263	0.451781	0.426225	0.128933	-0.00729779	0.0928213	-0.100119	-0.266135	-0.00215005	0.0884375	0.273139	-0.229275	-0.102794	-0.0137692	-0.193955	0.0562744	0.651194	0.256004	0.559982	0.137917	0.0741191	0.47002	0.416489	-0.112377	0.532363	0.341713	0.379064	0.207062	0.330729
TCGA-5R-AA1D-01	-0.494192	-0.547669	0.461215	-0.271865	-0.117822	-0.0701014	-0.433236	0.0171812	0.32859	0.169522	-0.0421755	0.157852	-0.156358	-0.251463	-0.061054	-0.194068	-0.227808	0.278692	-0.295778	-0.592538	-0.127506	-0.562404	-0.33322	-0.369653	0.278299	-0.0175329	-0.161827	0.267059	0.277394	0.0431001	0.0522822	0.233528	0.370752	0.366554	0.486483	-0.03224	-0.203365	-0.0542738	-0.517446	-0.121041	-0.243212	-0.571977	-0.468661	-0.771861	-0.377219	-0.379305	-0.117796	-0.0664852	-0.397685
TCGA-5R-AAAM-01	0.115856	-0.0088556	0.519856	0.321523	0.111367	0.379546	-0.211909	0.207157	0.319922	0.500685	0.479379	0.329581	0.0665106	-0.107141	0.362287	0.147116	-0.227617	0.278084	0.382906	-0.396468	-0.427815	-0.26468	-0.283851	0.121067	-0.0417824	0.310957	0.334275	0.345137	0.27909	0.0385206	0.0913877	0.395926	0.442813	0.374413	0.477998	0.486646	0.498415	0.325504	0.660427	0.343604	0.458076	0.610362	0.62289	0.515065	0.614301	0.53689	-0.45284	0.0120739	-0.287944
TCGA-BC-4072-01	-0.421004	-0.257381	0.149357	-0.134634	-0.0940191	-0.0165479	0.0486484	0.194355	0.328187	-0.0988828	-0.0144297	0.0524848	0.16108	-0.2117	0.0191194	-0.0390751	-0.502174	0.135835	-0.0392236	-0.269357	0.0988917	0.331607	-0.0564822	0.0957884	0.207645	-0.539227	-0.129047	0.0681206	0.104085	0.343228	0.302804	0.41675	0.215003	0.191993	0.280841	-0.285961	0.0704082	0.0388989	-0.273169	0.102793	0.0136332	-0.489377	-0.677114	-0.474231	-0.722378	-0.36381	0.0630835	0.105724	-0.029287
TCGA-BC-4073-01	0.428487	0.337745	0.404665	0.0993158	0.526189	-0.0598635	-0.0809678	0.00285816	0.0639729	-0.346351	-0.458264	-0.201459	0.267939	0.330127	0.604207	0.599316	-0.0512069	0.0462298	6.27e-05	0.304358	0.271122	0.379447	0.200253	0.377816	-0.192679	-0.153493	0.486753	-0.0959555	-0.508292	0.473845	0.147746	0.528945	0.15787	0.109436	0.149367	-0.130003	-0.153888	-0.0686798	-0.002769	0.115734	0.103197	-0.190588	-0.611748	-0.391867	-0.624796	-0.406272	-0.468433	0.0877865	0.0944167
TCGA-BC-A10Q-01	0.0987376	-0.154265	0.115513	0.392134	0.206983	-0.288898	0.421956	-0.0901567	0.036975	-0.217684	-0.56656	-0.495528	0.237627	0.0216018	0.118015	0.10325	-0.343985	-0.0365255	-0.396668	0.159575	0.0250039	0.384273	0.391967	0.169385	0.40083	-0.279151	0.456458	-0.0288459	-0.00107736	0.355503	0.0285278	-0.443367	0.291842	0.262204	0.277555	-0.0968892	0.456829	-0.0343464	-0.492976	0.0484336	0.186477	-0.672927	-0.619504	-0.801977	-0.694118	-0.508107	0.468569	0.000953029	0.0138118
TCGA-BC-A10R-01	-0.0929895	-0.223004	0.282987	-0.200363	-0.137484	0.0818982	-0.0732104	0.0815828	0.223941	0.139467	-0.120129	0.112508	0.146064	-0.0171986	-0.235401	0.0243982	0.0680777	-0.0340415	0.104725	-0.50125	-0.264568	-0.313667	-0.325755	-0.32204	0.222066	-0.195228	0.366978	0.323768	0.381702	0.280855	-0.00882909	-0.514858	0.337108	0.367035	0.429395	-0.00999386	0.317943	-0.208787	0.571378	-0.042508	-0.17377	0.608356	0.231431	-0.687095	-0.30123	0.317794	-0.0866957	-0.0942429	-0.29995
TCGA-BC-A10S-01	-0.455328	-0.495491	0.23584	0.0976028	0.265341	0.125543	-0.60792	-0.0330785	-0.0236042	0.327093	0.261687	0.00733107	-0.199344	0.40005	0.363243	0.100117	-0.522892	0.145178	0.0445147	-0.409715	-0.375627	-0.465338	-0.038895	-0.0460034	0.153149	-0.165581	0.313475	-0.0443328	-0.161655	0.178435	0.315997	0.351191	0.105435	0.0593769	0.143084	0.200689	-0.377398	-0.110053	0.209428	0.101301	0.0908398	0.152456	0.577515	-0.540125	0.624174	0.197179	0.039582	-0.123332	-0.14491
TCGA-BC-A10T-01	-0.221206	-0.492677	0.0773053	-0.465924	0.150991	-0.123837	0.214559	-0.279692	-0.327146	0.197601	-0.101198	-0.188545	-0.232072	-0.34963	-0.172087	-0.403932	-0.166762	0.106635	0.182001	0.151291	-0.413998	-0.230363	-0.335298	-0.482499	0.207644	0.0865069	-0.0562822	-0.068122	0.311383	-0.0811333	-0.209268	-0.447999	0.387019	0.354292	0.393887	-0.0263616	0.204472	0.0267397	0.0820004	-0.20749	-0.166044	-0.0155348	-0.187159	0.609298	0.617097	0.111222	-0.00940548	0.158987	-0.0213711
TCGA-BC-A10U-01	0.0255078	0.321916	-0.291239	0.256996	-0.357949	-0.237858	-0.17133	-0.0711859	-0.0716673	-0.169416	0.193609	-0.0392619	0.0757223	-0.10393	0.409732	0.157351	-0.212668	-0.0810787	-0.166472	0.309241	0.212622	0.259631	0.366235	0.277456	-0.409559	-0.253332	0.561058	-0.184974	-0.39518	0.05114	-0.218608	-0.450551	-0.184118	-0.0857292	-0.198102	-0.216702	-0.433892	0.0751479	0.125253	0.168638	0.0653945	-0.170338	-0.465636	-0.161292	-0.263925	-0.182162	-0.518058	-0.289118	-0.161924
TCGA-BC-A10W-01	0.602111	0.0488676	0.274302	-0.197074	0.687307	0.322976	0.487125	0.254407	0.249872	-0.0548585	-0.346013	-0.075574	0.258994	0.264074	0.534414	0.250552	0.388075	0.195132	0.275785	0.596418	0.475013	0.514889	0.280405	0.277618	0.000117249	-0.245261	0.574679	-0.082347	-0.11097	0.43272	-0.231423	0.0994353	0.22549	0.292872	0.187233	0.050411	0.253963	0.395611	0.130911	0.444952	0.247292	0.202575	-0.338772	0.0656626	-0.464898	-0.114353	-0.0320555	0.375631	0.468551
TCGA-BC-A10X-01	-0.535561	-0.237729	0.379901	0.297095	-0.0521567	0.150712	-0.510793	-0.0437897	0.265605	0.358908	0.348389	0.102503	0.155002	0.172958	-0.388857	-0.497618	-0.106087	0.324813	0.202802	-0.524346	-0.33937	-0.340576	-0.386171	-0.21373	-0.0699371	0.405855	0.362913	-0.0526792	0.464419	0.0582499	-0.000269221	0.0449029	0.265734	0.384473	0.384226	0.528556	0.403178	0.0889425	0.525619	0.0984859	0.210617	0.553227	0.70144	-0.534891	0.680767	0.35088	-0.437066	-0.0928799	-0.376518
TCGA-BC-A10Y-01	0.259121	-0.291704	-0.26326	-0.443431	0.0742383	-0.302777	0.436017	-0.302013	-0.113655	0.0383728	0.146111	0.0422316	-0.258921	-0.295707	-0.212996	-0.16392	0.0997028	-0.406243	0.122757	-0.133799	0.239901	0.354068	0.17249	-0.305897	-0.330443	-0.126122	-0.0214143	-0.115838	-0.0857832	-0.0240911	0.330483	0.0826274	-0.358515	-0.24946	-0.352486	-0.133073	0.0397854	-0.00719157	-0.465932	0.0653494	-0.193645	-0.549258	-0.0145885	0.39826	0.325268	-0.321229	-0.299418	-0.0168346	0.165333
TCGA-BC-A10Z-01	0.277352	0.427869	-0.275505	-0.253002	-0.204464	0.29614	0.405144	-0.0939189	-0.0808059	-0.0929182	-0.0102214	-0.117053	0.168937	-0.164168	-0.218092	-0.376175	0.304542	0.119799	0.199421	0.0852889	0.358231	0.410515	-0.254807	0.0188782	-0.349362	-0.551913	0.535859	-0.122982	0.20638	0.0145214	-0.517692	-0.658274	-0.397563	-0.319995	-0.41198	0.134004	0.471678	0.199674	0.247706	0.214776	-0.120349	0.335041	0.501225	0.694685	0.337373	0.272131	-0.0215873	-0.118238	0.0249718
TCGA-BC-A110-01	-0.624524	-0.649485	0.312223	0.164568	-0.111922	0.116429	-0.666997	-0.133065	0.0321734	0.322205	0.27619	-0.113739	0.0787586	0.135586	-0.198453	-0.0559661	-0.557373	0.121176	-0.180934	-0.598374	-0.462335	-0.729988	-0.48916	-0.34357	0.15983	0.404718	0.234188	0.191873	0.281471	0.285396	0.0936721	0.442023	0.50113	0.459549	0.528795	0.295388	-0.349931	0.0811896	0.232211	-0.085723	0.170243	0.133543	0.514639	-0.604414	0.315341	0.337523	-0.430226	-0.158596	-0.453689
TCGA-BC-A112-01	0.185127	-0.200678	0.146601	0.0369983	0.0425955	-0.0981914	0.12196	-0.0592062	-0.208695	-0.197148	-0.516166	-0.369071	0.121567	0.0816609	0.10589	-0.124082	-0.0613414	-0.0944341	-0.126922	0.488445	0.420634	0.651391	0.31391	0.153624	0.243117	-0.13107	0.534691	-0.0396036	-0.0547809	0.3697	0.148259	-0.175776	0.370284	0.491741	0.42243	-0.106569	-0.335548	0.0746859	0.0781788	-0.0704765	-0.32976	0.288972	-0.576101	-0.587499	-0.753483	-0.282813	-0.119194	0.322198	0.210192
TCGA-BC-A216-01	-0.337644	-0.659281	-0.0493992	-0.644251	0.0766611	-0.146793	-0.30559	-0.0537229	0.0511474	-0.241379	-0.00135751	0.0749536	-0.298366	0.513398	-0.39811	-0.542713	-0.252832	-0.243245	-0.0734561	-0.349264	-0.0525612	-0.127405	-0.295747	-0.544619	-0.332953	-0.379285	0.504066	0.300409	-0.423622	-0.202539	0.149838	0.329718	-0.235331	-0.24622	-0.212419	-0.472823	-0.596303	-0.465703	-0.40138	-0.305179	-0.496594	-0.412514	-0.529221	-0.56285	-0.648976	-0.347115	-0.485132	-0.159677	-0.267503
TCGA-BC-A217-01	0.161664	0.45802	-0.509747	-0.328723	-0.172488	-0.294814	0.455934	-0.407235	-0.258052	-0.175974	-0.252895	-0.268924	0.00028782	0.0871299	-0.169786	-0.0648044	-0.0126051	-0.38447	-0.0979989	0.0587875	0.0606053	0.0468707	0.314312	-0.0283842	-0.378529	-0.499888	0.211304	-0.277963	-0.590885	-0.0835741	0.250081	0.398613	-0.350139	-0.321181	-0.369218	-0.0926214	-0.305284	0.143804	-0.506043	0.0239851	0.0498185	-0.665027	-0.408551	-0.600021	-0.486796	-0.484242	-0.210474	-0.180155	0.0396794
TCGA-BC-A3KF-01	-0.261121	0.252009	-0.334018	0.116665	-0.287486	0.253867	-0.143576	0.0667891	-0.0838317	-0.0257962	0.142483	0.129675	0.0257494	0.215855	0.110135	-0.209323	0.0961731	-0.0498224	0.487723	-0.0613366	0.0236016	-0.0532559	-0.090563	0.160976	-0.00829325	0.437816	0.0233767	-0.0914528	0.208339	-0.248253	0.0234554	-0.463053	-0.335815	-0.343753	-0.378553	0.203766	0.357289	-0.0257507	-0.333428	-0.0267595	-0.0828237	-0.15532	0.162102	0.615818	0.206755	0.0715499	0.14044	-0.277662	-0.205688
TCGA-BC-A3KG-01	0.271023	-0.0286709	-0.27334	-0.55167	-0.52975	-0.0958702	0.0328353	-0.338723	-0.409581	-0.460454	-0.49641	-0.335492	-0.17923	-0.281159	-0.516026	-0.598906	0.0762199	-0.349588	-0.204857	0.267351	0.417363	0.34713	-0.28495	-0.435844	-0.324828	-0.670276	0.296717	-0.0723122	-0.534233	-0.0785787	-0.254958	-0.441107	-0.412651	-0.273479	-0.413952	-0.18554	-0.0921661	-0.292484	-0.3309	-0.0380949	0.0839196	-0.34185	0.0828014	0.200304	-0.527309	-0.351102	-0.0718592	-0.142612	-0.0177738
TCGA-BC-A5W4-01	0.121466	-0.30468	-0.357581	-0.210833	-0.00799069	-0.139325	0.230587	-0.200899	-0.418426	-0.0820831	0.029065	-0.398601	-0.0359134	0.0763126	-0.346049	-0.577304	-0.0689546	-0.23633	-0.452425	0.0100388	-0.200344	-0.496385	0.100919	-0.162976	-0.0663278	-0.0741948	-0.234201	0.00124037	-0.1401	-0.0955991	-0.2881	-0.494633	-0.376076	-0.282685	-0.327492	-0.122863	-0.068154	0.349407	0.308971	-0.0726235	-0.102838	0.391806	-0.148966	0.574007	0.221315	0.348191	0.24237	-0.122403	-0.0553951
TCGA-BC-A69H-01	0.140788	-0.00220794	-0.22098	0.0682051	0.10908	-0.338348	-0.0556095	-0.164076	-0.109789	-0.122768	-0.432825	-0.18077	-0.301504	-0.0600831	-0.0064891	-0.0526776	0.106839	-0.188013	-0.123639	0.11401	-0.339709	0.077057	0.0195005	0.0656204	0.10598	0.10645	-0.465603	-0.160874	-0.424372	0.232656	0.367757	0.253895	-0.158874	-0.234206	-0.25142	-0.178339	-0.568818	0.196449	-0.0205417	0.208642	0.114145	-0.264259	-0.620405	0.226219	-0.660517	-0.307329	0.259552	0.0375805	0.189027
TCGA-BC-A69I-01	-0.253802	-0.0977525	-0.163276	0.298426	-0.0922201	0.0384456	-0.473379	-0.0985577	-0.133214	0.301706	0.1389	0.136852	0.0316003	0.0677333	-0.0690342	-0.0490886	-0.550378	0.265008	-0.320732	-0.371017	-0.255726	-0.622763	-0.304436	-0.15815	-0.0479783	0.432628	0.024559	-0.147312	0.278418	-0.460637	0.498675	-0.337441	-0.0337881	0.0769996	0.054309	0.0346879	0.00553821	0.0770932	-0.0602952	-0.100782	0.331698	0.0737798	0.600818	0.252617	0.843518	0.340365	0.0569772	-0.01637	-0.153622
TCGA-BC-A8YO-01	0.260589	-0.0768739	-0.138459	-0.202365	-0.170855	0.113193	0.262734	-0.0949423	-0.183487	-0.296973	-0.313835	-0.191581	0.134045	-0.398564	-0.184198	-0.349424	0.322898	-0.183002	0.469576	0.489383	0.269409	0.482117	0.00678472	-0.0124195	-0.37586	-0.35745	0.687297	-0.105237	-0.355188	0.194368	0.236753	0.533858	-0.0806689	-0.0683104	-0.149361	0.284262	0.180759	0.48826	0.626613	0.435973	-0.0121373	0.670287	-0.0215063	-0.334819	-0.401432	0.103672	-0.472682	0.0579512	0.0897824
TCGA-BD-A2L6-01	-0.0549838	-0.131649	-0.375493	-0.314281	-0.276614	0.0961368	-0.0711494	-0.208213	-0.283273	-0.0696075	-0.104855	-0.0211385	-0.152298	-0.0274211	-0.233289	-0.396799	-0.127152	-0.0101664	0.376419	-0.617228	-0.224412	-0.300409	-0.443348	-0.284554	-0.00654908	0.449027	-0.019258	-0.320955	-0.224491	-0.425457	0.0734081	0.0762838	-0.441691	-0.454072	-0.416452	-0.0303329	-0.212173	-0.15957	0.307052	-0.247418	-0.147269	0.219446	0.414647	-0.430172	0.069188	0.0848843	0.213581	-0.136562	-0.130364
TCGA-BD-A3EP-01	0.183634	0.0528433	0.505825	0.113912	0.406065	0.137787	-0.406912	0.0657643	-0.0364698	0.0277845	-0.24392	-0.0950947	-0.108508	0.0462139	0.350685	0.517802	-0.00469531	0.139076	-0.429385	-0.238868	0.155934	-0.338721	-0.0122761	0.115408	-0.0261128	-0.189392	0.0206232	0.23309	-0.327073	0.20701	-0.0909959	0.598267	0.367082	0.275492	0.374609	-0.127565	-0.283578	0.106531	0.289538	-0.102752	0.173139	0.19069	-0.423715	-0.383318	-0.344773	-0.00115009	-0.358283	-0.0664892	-0.126186
TCGA-BD-A3ER-01	-0.423934	-0.534977	0.302479	-0.371125	0.147634	0.252219	-0.76405	-0.111896	0.0562398	0.337863	0.132962	0.309776	-0.303737	0.317026	0.13553	0.195716	-0.45759	0.0690015	-0.196085	-0.559399	-0.357094	-0.6388	-0.503192	-0.406425	0.087244	0.0151516	-0.102216	0.234636	0.375164	-0.0817806	-0.0790431	-0.0566429	0.348213	0.328534	0.376492	0.410905	0.116788	0.102101	0.547579	0.00164685	0.191101	0.680419	0.591159	-0.509366	0.215201	0.393607	-0.404728	-0.164034	-0.387252
TCGA-BW-A5NO-01	0.446312	-0.0156137	-0.182912	0.0477123	-0.0904226	-0.0247487	0.251073	-0.0967943	-0.110544	0.0691218	-0.163259	-0.345881	0.0418524	-0.0618677	-0.178377	0.163805	0.225367	-0.180271	0.318285	-0.504163	0.278447	-0.2593	0.173224	0.173042	-0.239458	-0.121794	-0.155032	-0.185329	-0.322226	0.134765	0.0233556	0.287554	-0.261897	-0.343007	-0.33377	-0.05339	-0.395212	0.0345559	-0.372055	0.0365404	0.229691	-0.515985	-0.194512	0.717146	0.000146369	-0.0638523	-0.0706174	-0.0572504	-0.0549572
TCGA-CC-5258-01	0.407648	0.21608	0.233956	0.118649	0.539371	-0.0962139	0.127362	-0.0766429	0.0910152	-0.268636	-0.155791	-0.270448	0.0823087	-0.0931218	0.174149	0.0679193	0.325175	0.0268075	0.0441798	0.54613	0.276982	0.625092	-0.0820086	0.157183	-0.292032	0.0239555	-0.315146	-0.0440966	0.044763	0.455728	-0.124869	0.240957	0.126401	0.242081	0.152663	-0.166966	-0.286966	0.183618	0.0184455	0.0175022	0.264603	-0.176531	-0.427463	0.688159	-0.382051	-0.139585	-0.500333	0.254095	0.202968
TCGA-CC-5259-01	-0.585283	-0.458737	-0.207768	-0.678094	-0.58761	-0.421025	-0.42141	-0.235593	-0.274709	0.0383418	-0.086856	-0.151948	-0.326412	0.0654207	-0.207974	-0.287518	-0.285517	-0.408299	-0.477653	-0.640222	-0.637293	-0.603743	-0.609093	-0.515208	0.204978	-0.548406	-0.723279	-0.049809	-0.199561	-0.268238	0.188643	-0.12616	-0.469611	-0.488737	-0.381414	-0.329599	-0.719865	-0.318171	0.0939591	-0.392146	-0.522199	0.15267	-0.537086	-0.268575	-0.311101	-0.0147224	0.104768	-0.392291	-0.380245
TCGA-CC-5260-01	0.382551	0.237356	0.490453	0.364984	0.658408	-0.041987	0.569268	0.212234	0.132095	-0.273774	-0.640625	-0.308838	0.44286	0.396585	0.444567	0.477135	-0.00630239	-0.0860256	-0.262105	0.55358	0.405664	0.575237	0.467028	0.492012	0.0701667	-0.433527	0.509921	0.232981	-0.0495833	0.481365	-0.153983	0.17955	0.426529	0.440363	0.474149	-0.382629	-0.113433	-0.202782	-0.59067	-0.00891042	0.0294422	-0.62905	-0.680991	-0.488038	-0.71664	-0.588591	-0.230342	0.254895	0.281487
TCGA-CC-5261-01	0.570322	0.40474	0.324183	-0.00463022	0.267535	0.0931407	0.534535	0.185904	0.219855	-0.189032	-0.459495	-0.144274	0.443322	0.417018	0.322255	0.183445	0.40901	-0.280739	-0.0505093	0.353441	0.500679	0.440343	0.274091	0.40673	-0.285744	-0.1783	0.417258	0.04672	-0.079071	0.468856	-0.14805	0.529437	0.425297	0.479259	0.425683	-0.405214	-0.271641	-0.300435	-0.63746	-0.0972526	-0.160188	-0.701002	-0.549145	-0.205343	-0.660811	-0.625032	-0.572937	0.156192	0.0808777
TCGA-CC-5262-01	0.535606	0.309798	0.454413	0.508096	0.652125	0.303853	0.336907	0.232119	0.224093	0.249175	-0.102892	0.0286851	0.325203	0.270951	0.613007	0.534877	0.317576	0.394799	0.245627	0.444986	0.216368	-0.247571	0.312988	0.507624	0.41152	0.0881293	0.0193633	-0.235779	0.48773	0.409244	0.0861998	0.491982	0.399245	0.343831	0.347524	0.337633	0.382877	0.425618	0.333339	0.251393	0.32696	0.334952	-0.0210259	0.38593	0.368549	0.293411	0.38743	0.431952	0.514033
TCGA-CC-5263-01	0.550206	0.318881	0.368619	0.0255229	0.589728	-0.069549	0.548376	0.0019302	-0.139026	-0.381584	-0.482922	-0.208365	0.335646	0.364954	0.241489	0.089905	0.0828418	-0.167532	0.127517	0.300435	0.465832	0.674413	0.449501	0.3886	-0.392026	0.208128	0.655511	-0.0607436	-0.63913	0.478114	-0.0126641	0.1113	0.247766	0.427451	0.213604	-0.235373	-0.482766	0.160589	-0.227495	0.231937	0.197996	-0.39551	-0.65836	-0.062905	-0.811847	-0.480022	-0.364091	0.250288	0.312777
TCGA-CC-5264-01	0.483839	0.0735023	0.020606	0.0492956	0.231402	-0.0222322	0.40697	0.163769	-0.105695	-0.200014	-0.27882	-0.313924	0.224852	-0.0937845	0.174653	-0.24514	0.411294	0.258585	0.292266	0.305532	0.578274	0.463915	0.386337	0.243994	-0.224305	0.130075	0.421988	-0.0359972	-0.429051	0.533087	0.0795241	0.287384	0.117142	0.285536	0.0608	-0.125594	0.145597	0.318916	-0.115854	0.254184	-0.0406516	-0.227903	-0.442573	0.40185	-0.34524	-0.256675	-0.234567	0.205408	0.320733
TCGA-CC-A123-01	-0.080279	-0.570053	-0.260743	-0.537993	-0.107754	-0.368962	-0.359446	-0.318952	-0.245482	0.0458286	-0.0714227	-0.219983	-0.353039	-0.133008	-0.370769	-0.219969	0.238806	-0.197922	0.154722	-0.240462	-0.382398	-0.30554	-0.30597	-0.267757	0.175827	-0.421683	-0.771106	-0.309611	-0.220751	-0.0691665	0.227373	-0.315215	-0.324404	-0.263047	-0.347352	-0.518935	-0.744548	-0.272025	-0.483782	-0.23476	-0.257134	-0.607975	-0.507157	0.372885	-0.264037	-0.236955	0.314537	-0.106902	-0.0681571
TCGA-CC-A1HT-01	0.123929	-0.0101763	0.217797	-0.0683683	0.319233	-0.29067	0.341603	0.110042	0.0687916	-0.376393	-0.618078	-0.148076	0.0437267	-0.0718366	0.271186	0.241697	-0.195253	-0.207491	-0.285382	0.486562	0.561424	0.644892	0.604842	0.388244	-0.0717756	-0.666071	0.355288	0.198418	-0.63326	0.450991	0.188496	0.577674	0.249837	0.17386	0.223186	-0.191318	-0.467516	0.245638	-0.254463	-0.0239084	-0.00960639	-0.384701	-0.836175	-0.744108	-0.768868	-0.486533	-0.280269	0.207349	0.306778
TCGA-CC-A3M9-01	0.172738	0.283288	0.17694	0.37537	0.60205	-0.235005	0.167826	-0.12602	-0.257077	-0.454011	-0.751725	-0.556313	0.00566941	-0.0900105	0.596205	0.580898	0.133266	-0.344899	-0.307915	0.353208	0.402711	0.412307	0.554176	0.467055	0.0110983	-0.53927	-0.10126	-0.000760506	-0.546217	0.449847	0.268185	0.573921	0.272033	0.146459	0.285821	-0.140153	-0.342976	-0.0323901	-0.712607	-0.00434299	0.287187	-0.8269	-0.765384	-0.61879	-0.791083	-0.806165	-0.0762779	0.263977	0.395126
TCGA-CC-A3MA-01	-0.111941	-0.454482	0.0847384	-0.284624	0.472724	-0.129929	0.354613	0.127985	0.00521418	-0.423528	-0.451011	-0.204823	-0.0785272	0.134628	0.0875891	-0.331303	-0.202096	-0.202232	-0.597374	0.17614	0.358321	0.504823	0.359494	0.00261312	0.127228	-0.269373	-0.12897	0.260459	-0.214846	0.337569	-0.448472	-0.140221	0.326257	0.412714	0.39438	-0.322814	-0.47443	-0.30953	-0.679183	-0.177458	-0.206651	-0.744168	-0.700687	-0.646171	-0.740516	-0.650385	0.0387764	0.181595	0.205158
TCGA-CC-A3MB-01	0.319111	0.529523	-0.0448484	0.413258	0.0941785	0.191408	0.384529	0.219666	-0.0996781	-0.294419	-0.113116	-0.164511	0.1599	0.0592939	0.266756	-0.0481638	0.439106	0.0420118	0.301019	0.562545	0.355913	0.636871	0.478775	0.263752	-0.0841693	-0.194494	0.522409	-0.210682	-0.142074	0.275471	-0.359238	-0.323837	0.0146287	0.0655166	-0.0774475	-0.064064	0.332774	0.159056	0.329898	0.154345	0.22829	0.27833	-0.0121672	0.29474	-0.29811	0.246591	0.0959894	0.212636	0.40517
TCGA-CC-A3MC-01	0.334896	0.639652	0.293405	0.219507	0.527149	0.32741	0.292655	0.20694	0.120588	0.167664	-0.127429	0.280789	0.345892	0.363328	0.736748	0.363213	0.248594	0.098123	0.0972139	0.222309	-0.074067	0.145029	0.104845	0.309265	0.49469	0.0263726	0.229215	0.427559	0.191798	0.331375	-0.0497013	-0.0640752	0.493295	0.516458	0.564183	0.17869	0.575664	0.268039	0.418985	0.319067	0.237809	0.514713	-0.163097	-0.255975	-0.320094	0.164902	0.46595	0.308565	0.307535
TCGA-CC-A5UC-01	0.327828	-0.376729	0.0192949	0.139129	0.561883	0.0706572	-0.102352	0.163446	0.01473	-0.137315	-0.135393	-0.274678	0.0837041	0.337195	0.242838	-0.157468	0.461054	-0.180038	0.262199	0.301819	-0.0711261	0.292778	-0.2919	-0.0164265	0.267024	0.300953	-0.487469	-0.0364761	0.0827285	0.243022	-0.0950714	0.162138	0.347672	0.254108	0.321371	-0.0703506	-0.309516	-0.262233	-0.253997	-0.246471	0.110558	-0.226204	-0.408771	0.652584	-0.469743	0.0295089	0.0256458	0.315431	0.245421
TCGA-CC-A5UD-01	0.378365	0.311089	-0.111686	0.560144	0.214633	0.0132993	0.420401	0.261112	-0.00586327	-0.210851	-0.316977	0.0880449	0.243309	-0.147335	0.309983	0.133836	0.0773027	-0.11943	-0.331351	0.201945	0.407847	0.580683	0.312464	0.378759	0.341737	-0.105324	0.344614	0.117257	-0.141801	0.330683	0.212187	-0.197568	0.202523	0.202312	0.175733	-0.324591	-0.186097	0.0760444	-0.129237	0.0183243	-0.280868	-0.123869	-0.379141	-0.179545	-0.619617	-0.289946	0.306722	0.166118	0.360386
TCGA-CC-A5UE-01	0.0798542	0.221252	-0.269375	0.0669453	-0.0716571	0.0597481	0.478135	0.069439	0.0786486	-0.271571	-0.335527	-0.259555	0.0935807	0.106377	0.192904	-0.0595037	0.363544	0.0149727	0.46617	0.434101	0.231613	0.397467	0.359153	0.268711	-0.172655	-0.333707	0.0319856	-0.394622	-0.368942	0.210549	-0.268524	-0.168039	-0.256653	-0.318818	-0.321004	-0.151604	0.170184	0.323348	0.37876	-0.0639214	0.199479	0.237114	-0.269003	0.273163	-0.523064	-0.0661322	0.109936	0.175124	0.454229
TCGA-CC-A7IE-01	0.199449	-0.588713	-0.322114	-0.12968	0.464504	-0.241838	-0.126122	0.158666	0.331169	-0.0387983	0.0378594	0.237955	-0.160264	0.33903	0.0332969	-0.25766	0.339499	-0.329439	-0.368905	-0.15787	-0.0712252	-0.101438	-0.489488	-0.342506	0.117121	-0.312544	-0.611468	0.211255	-0.0670573	0.0641976	0.028188	0.4337	-0.0594541	-0.0253148	-0.0928481	-0.41703	-0.66433	-0.410575	-0.536513	-0.260601	-0.356301	-0.573451	-0.645668	-0.20722	-0.678854	-0.451474	-0.152901	0.0516334	-0.1265
TCGA-CC-A7IF-01	-0.586514	-0.440761	-0.237411	-0.450665	-0.349158	-0.00858923	-0.266724	-0.236283	-0.105051	0.122123	0.294649	0.293816	-0.355521	-0.125759	-0.292155	-0.344497	-0.506758	-0.465071	-0.155906	-0.709599	-0.55855	-0.506436	-0.517078	-0.542117	0.195653	-0.459777	-0.501999	0.29623	-0.0386375	-0.533185	-0.117041	-0.55268	-0.224735	-0.255407	-0.154053	-0.210247	-0.493101	-0.41537	0.055916	-0.426188	-0.355891	-0.129423	-0.369222	0.198287	0.162906	0.0154169	0.166197	-0.339702	-0.409719
TCGA-CC-A7IG-01	-0.0731	0.257463	-0.255189	0.0613358	0.071192	-0.0822603	-0.0479689	-0.104863	-0.256355	-0.217744	-0.479961	-0.233066	-0.123737	0.186537	0.246626	-0.0459303	-0.286058	-0.285639	-0.1461	0.101142	-0.198179	0.168083	0.107047	0.096855	0.352164	-0.417267	-0.442061	0.00326037	-0.197271	0.244563	0.0325918	-0.366953	-0.0359819	-0.0801726	0.0143244	-0.354504	-0.537687	0.0335452	-0.439912	0.0216338	-0.175842	-0.457113	-0.625912	-0.295992	-0.712119	-0.412775	0.415836	0.0373093	0.118641
TCGA-CC-A7IH-01	0.0207328	0.170951	-0.143706	-0.110559	-0.227063	-0.120003	0.245639	-0.0956671	-0.143953	-0.141114	0.240741	0.025927	-0.0354345	-0.128745	-0.280124	-0.176803	-0.281806	-0.112345	-0.149708	0.225916	0.15829	0.104054	-0.0627729	-0.215996	-0.181987	0.302583	-0.0977189	-0.122412	-0.22372	-0.198104	-0.18308	-0.616174	-0.209689	-0.0680123	-0.185679	-0.0952427	0.0121857	-0.103939	0.254421	-0.426009	-0.304154	0.259006	0.579679	0.309418	0.535001	0.307036	-0.0790793	-0.102034	-0.168676
TCGA-CC-A7II-01	0.0891681	-0.645673	0.0184129	-0.491124	0.241736	-0.407143	0.0789042	-0.369475	-0.404808	-0.545036	-0.6999	-0.576709	-0.368239	-0.275491	-0.178737	0.0210336	-0.262154	-0.509663	-0.462756	0.514965	0.388607	0.37633	-0.0737305	-0.437422	-0.0498715	-0.647456	-0.560665	-0.0829191	-0.620675	0.0721158	-0.295745	-0.480612	-0.315013	-0.262242	-0.331205	-0.377378	-0.569629	-0.233887	-0.769821	-0.221384	-0.267696	-0.785744	-0.834129	-0.564096	-0.800993	-0.753481	-0.0898729	0.162943	0.178288
TCGA-CC-A7IJ-01	0.0941055	-0.0117805	0.230617	0.346706	0.496409	-0.158292	-0.0975618	0.045197	-0.0758293	-0.432946	-0.555736	-0.243618	0.00768781	-0.0694129	0.296631	0.555638	-0.139433	-0.282591	-0.415217	0.299392	0.432127	0.344524	0.351922	0.37798	-0.0596662	-0.606557	0.464178	0.261014	-0.413321	0.39311	0.091614	0.536069	0.235418	0.240603	0.265133	-0.255351	-0.343769	0.103124	-0.730464	-0.26965	0.0179597	-0.797955	-0.722329	-0.572864	-0.771054	-0.703469	-0.24113	0.21444	0.248735
TCGA-CC-A7IK-01	0.341637	-0.183801	-0.236304	0.0283126	-0.23599	0.00665739	0.361123	0.0729412	-0.104555	-0.350303	-0.133809	-0.336202	0.0178046	-0.434628	-0.339416	0.0320705	0.142156	0.114951	-0.0988057	0.187725	0.43177	0.379319	-0.0203694	-0.07722	-0.222623	0.200219	0.262964	-0.0842358	-0.253956	-0.0127883	-0.232364	-0.528333	-0.171904	0.0327961	-0.181221	-0.163504	-0.160623	0.121367	0.345541	-0.0866046	-0.356299	0.401791	0.0985572	-0.20812	0.109399	-0.0151409	-0.196603	0.177725	0.276613
TCGA-CC-A7IL-01	0.260468	0.380679	-0.310614	0.305409	0.0162753	-0.0540948	0.526129	-0.189566	-0.236263	-0.10036	-0.0770823	-0.242018	0.0719823	-0.182307	-0.219465	-0.00949365	-0.33335	0.0031679	0.162941	0.307436	-0.26328	0.0646522	-0.0489522	0.220682	-0.0611785	0.0924148	-0.322978	-0.284355	0.320771	-0.404334	0.108717	-0.514214	-0.398507	-0.296851	-0.407176	0.142534	0.378084	0.0904773	0.424142	0.0240806	-0.0784355	0.479799	0.651335	0.671782	0.616215	0.416431	0.326108	-0.242628	0.055521
TCGA-CC-A8HS-01	0.125996	-0.435324	-0.0627977	-0.515238	0.222535	-0.0293836	0.159507	0.139622	-0.131746	-0.490284	-0.53594	-0.278208	0.0328372	0.34418	0.063207	-0.357701	0.435727	-0.309711	0.130937	0.179142	0.348971	0.290146	0.0536409	-0.379383	-0.250917	-0.330454	0.124671	0.190204	-0.125001	-0.00431741	-0.553142	-0.167868	-0.0929364	-0.143118	-0.104331	-0.459806	-0.459991	-0.402894	-0.678868	-0.379563	-0.362173	-0.626815	-0.488432	-0.275323	-0.755178	-0.621664	-0.210446	0.0583203	0.196821
TCGA-CC-A8HT-01	-0.132185	-0.057664	-0.31765	-0.243049	-0.454292	-0.194476	-0.4249	-0.155375	-0.153681	-0.357946	-0.461436	-0.370715	-0.227808	-0.106827	0.152513	0.0275806	0.0768954	-0.390397	0.0417839	0.0430242	0.270416	-0.0492129	-0.103375	-0.152276	-0.0333467	-0.188554	0.00902433	0.0132332	-0.57772	-0.145473	-0.0507749	0.253849	-0.354236	-0.414404	-0.404485	-0.200088	-0.377722	0.173413	0.0204846	-0.15019	-0.241902	0.0347789	-0.718416	-0.277979	-0.634289	-0.0817775	0.26528	-0.0941845	-0.0433036
TCGA-CC-A8HU-01	-0.175912	0.241848	-0.0133056	-0.217793	0.0214632	0.0576985	0.212916	0.191634	-0.215605	-0.0348123	-0.320847	-0.292247	0.189819	0.0498023	0.29289	-0.160988	0.564529	0.121778	0.26857	0.32862	0.272103	0.520953	0.415468	0.272509	0.105475	0.112182	-0.0465881	0.019689	0.133407	0.221236	-0.375778	-0.451403	-0.28507	-0.320001	-0.307967	0.0155502	0.269765	0.5092	-0.449577	0.190213	0.0558389	-0.709598	-0.459966	0.253086	-0.419828	-0.449479	0.441825	0.13453	0.264358
TCGA-CC-A8HV-01	-0.280322	-0.185589	-0.329304	-0.435502	-0.0993556	-0.330804	-0.244718	-0.199401	-0.114831	-0.350364	-0.223591	-0.305058	-0.156256	0.308705	-0.171331	-0.369773	0.383705	-0.186486	-0.38047	-0.43197	-0.1087	-0.0421554	-0.174239	-0.391613	-0.0948795	-0.488983	-0.327378	0.264771	-0.429976	0.0660777	-0.251752	-0.384426	0.0923999	-4.58e-05	0.0419124	-0.567956	-0.811432	-0.389544	-0.646444	-0.397273	-0.525358	-0.67203	-0.740801	-0.526156	-0.851148	-0.59785	-0.40164	-0.129354	-0.144854
TCGA-CC-A9FS-01	-0.321494	-0.231246	-0.411991	-0.410744	-0.12635	-0.232197	-0.346776	-0.233389	-0.0443492	0.00668014	0.296068	-0.0679859	0.131985	-0.284523	-0.0977606	-0.526097	0.0172759	-0.298788	-0.0833707	-0.247827	-0.110589	-0.463749	-0.397531	-0.345989	-0.202848	-0.231003	-0.361473	0.158819	0.262284	-0.1606	0.263638	-0.407602	-0.351343	-0.267685	-0.24869	-0.453264	-0.368964	-0.206549	-0.193994	-0.385969	-0.0265561	-0.226515	-0.281624	-0.171977	0.312238	0.0629018	-0.102551	-0.127545	-0.26619
TCGA-CC-A9FW-01	0.21438	0.215081	-0.283317	0.0892249	-0.132575	-0.302341	0.118428	0.0696959	0.0355602	-0.241528	-0.387584	-0.229534	0.343676	-0.474278	0.146852	-0.00038824	0.437301	-0.0492062	-0.0110971	0.377421	0.146958	0.570373	0.233194	0.232332	-0.305796	0.230206	-0.424468	-0.229052	-0.401555	-0.16731	-0.416586	0.222458	-0.225848	-0.133394	-0.315521	0.00718599	-0.102796	-0.0820219	-0.552533	-0.15758	-0.291198	-0.552621	-0.425231	0.721146	-0.306882	-0.479385	-0.245706	0.153729	0.205645
TCGA-DD-A113-01	-0.044134	0.281833	0.00848537	-0.0602433	-0.248814	-0.0230305	0.274413	-0.0689962	0.423203	0.00974028	-0.00755166	0.271854	-0.00655176	-0.27985	-0.0647068	-0.468345	0.0910218	0.242254	0.164256	0.268454	-0.16083	-0.0965468	0.0149371	0.148739	0.191602	-0.138953	-0.348137	0.128032	0.27721	-0.0197979	0.295483	0.276019	0.272918	0.342043	0.281305	0.0497433	0.465725	0.0478369	0.103996	-0.0448959	0.00915221	0.158033	-0.027571	0.17055	-0.303286	0.0625806	-0.0545008	0.113866	-0.0226294
TCGA-DD-A114-01	0.56356	0.409566	0.542014	0.453742	0.554602	0.0299125	0.2979	0.152093	0.145888	-0.0543712	-0.379183	-0.149852	0.517292	0.382613	0.484489	0.393222	0.44199	0.406734	0.154228	0.502399	0.509131	0.496893	0.517873	0.576147	-0.0264615	0.423007	0.632969	-0.11176	0.161003	0.51129	0.21301	0.739552	0.450082	0.542105	0.467642	0.0100883	0.125631	0.375019	0.138466	0.431433	0.375183	-0.0157817	-0.614648	-0.29502	-0.489575	-0.196443	-0.277929	0.412775	0.409518
TCGA-DD-A115-01	0.456993	0.117165	0.276753	0.252031	0.310304	0.169848	0.275959	-0.12363	-0.194761	0.135935	-0.279564	-0.217987	0.135346	0.0881993	0.221714	0.0960062	-0.00384464	0.318818	0.0886031	-0.32715	-0.228491	-0.448049	0.0554296	0.240848	0.073653	0.337996	0.108869	-0.0148376	0.289474	0.0763014	0.239974	-0.046854	0.190641	0.193507	0.181654	0.225389	-0.208467	0.263658	0.0444517	0.262713	-0.000176928	0.156622	0.338314	0.175588	0.617904	0.171999	-0.0725462	0.150965	0.147919
TCGA-DD-A116-01	-0.508331	-0.483664	-0.143114	0.140521	0.0901657	-0.0716235	-0.213911	-0.0337924	0.0242286	0.337146	0.171515	0.018138	-0.00409449	0.103661	0.344403	-0.0136303	-0.62905	-0.0615875	-0.279579	-0.33688	-0.334903	-0.159428	-0.222411	-0.155718	0.459196	0.373993	-0.166964	-0.140526	0.297174	-0.0793541	-0.0419998	-0.262993	0.0869068	0.145074	0.0503478	0.0607417	-0.358568	-0.0626006	0.224277	-0.128768	0.165771	0.0527738	0.232799	0.329193	0.58613	0.200732	0.489055	-0.0729664	-0.158581
TCGA-DD-A118-01	0.41639	0.135699	0.405041	0.255929	0.124981	0.305325	0.378889	-0.000272779	0.042382	-0.221286	-0.121608	0.0130022	0.0485161	-0.322849	0.187868	0.127169	0.249187	-0.163539	0.168118	0.437623	0.107438	-0.470809	-0.148003	0.0922793	0.450147	0.237296	-0.0671227	0.0615169	0.0582952	0.34265	0.166467	-0.589324	0.144447	0.193809	0.242881	-0.0341233	0.58077	0.18868	-0.23715	0.115366	0.219706	-0.352633	-0.0808242	-0.0447098	-0.168998	-0.186405	0.561688	0.0404439	-0.0414044
TCGA-DD-A119-01	-0.325329	-0.519916	-0.284486	-0.396482	-0.0926639	-0.0888038	-0.1505	-0.0538246	0.0180813	0.397271	0.377326	0.0173251	-0.176686	-0.00180613	0.0592905	0.271394	-0.163118	-0.289272	-0.0642599	-0.361235	-0.295672	-0.738285	-0.158604	-0.124722	0.470654	-0.124899	-0.678578	-0.0294517	0.218466	-0.324208	0.33284	-0.36855	-0.0784932	-0.219856	-0.0839388	0.138899	0.191717	0.0122061	0.216159	0.161886	-0.275195	0.174655	0.23927	0.530623	0.185	0.401942	0.646807	-0.215686	-0.120968
TCGA-DD-A11A-01	0.0709995	-0.25258	-0.141921	0.164064	-0.172948	0.0284	0.127992	-0.0252656	-0.31324	-0.188356	0.00616055	-0.139413	-0.0585325	-0.228727	-0.127152	-0.426406	0.262607	0.336732	0.283643	0.286336	0.40969	0.0127779	0.113342	0.0174079	-0.0637244	-0.095378	0.296875	0.0619454	0.183712	0.134244	-0.231935	-0.538444	-0.235148	-0.100168	-0.274157	0.156284	0.712846	0.312582	0.440131	0.191551	-0.216284	0.450458	0.266222	0.695802	0.392308	0.136266	0.26498	0.0344681	0.0571041
TCGA-DD-A11B-01	0.0593519	-0.160902	0.173485	0.44728	-0.281801	0.346124	0.35818	0.118245	0.0209962	0.116091	0.195565	0.0777037	0.136029	0.137927	-0.0710255	-0.0154601	0.401373	0.212983	0.332508	-0.15703	0.146447	0.4189	0.0414104	0.006242	-0.403323	0.366906	0.139655	-0.0821068	0.245343	-0.256033	-0.512035	-0.50458	-0.128154	-0.182711	-0.209781	0.331166	0.488561	-0.080739	0.414751	-0.156991	-0.34903	0.567014	0.545465	-0.332359	0.650196	0.403287	-0.259078	0.0440277	-0.0722816
TCGA-DD-A11C-01	0.153655	-0.279845	0.196649	-0.51518	0.330799	0.105627	0.121476	-0.0976208	-0.136796	-0.0938281	-0.245124	-0.286042	-0.346013	-0.0683825	0.165514	0.145568	-0.399703	-0.0508483	-0.169751	-0.136584	0.175725	0.217886	-0.174371	-0.313604	0.107113	-0.0331148	0.252843	-0.0366146	0.157513	0.111492	0.1287	0.0084229	0.194345	0.146643	0.185214	0.148153	0.0482254	-0.164381	-0.410412	-0.00594077	-0.0651046	-0.411759	0.126039	-0.390746	0.523612	-0.224843	-0.128485	-0.0680463	-0.127102
TCGA-DD-A11D-01	0.599294	0.346998	0.342583	0.52562	0.250227	0.260874	0.442174	0.0942771	0.133108	0.152926	0.450035	0.264055	0.285637	-0.0024253	0.0185499	0.23013	0.0967076	-0.0272121	0.0778477	-0.117103	-0.266085	-0.116229	-0.161986	0.502607	-0.30306	0.552864	0.575605	-0.0259909	0.40378	-0.180734	-0.271608	-0.48641	0.0740707	0.332825	0.114675	0.544773	0.341374	0.136308	0.400598	0.193437	0.255072	0.45656	0.672908	0.299263	0.58064	0.250398	-0.226292	-0.0133458	-0.132889
TCGA-DD-A1EA-01	0.360385	0.443565	0.171592	0.366336	-0.101721	0.170768	0.125968	0.0788763	0.173339	-0.118128	0.262742	0.150557	0.304811	-0.316308	0.0969785	0.270177	-0.0667012	0.00529509	-0.0298053	0.341101	0.34458	0.507946	0.154039	0.155251	-0.405786	0.160968	0.394098	-0.212763	-0.286785	-0.207247	-0.0130397	0.5289	-0.137686	0.0280747	-0.17039	-0.0403633	0.358735	-0.0145594	-0.0535377	0.0839115	-0.0850443	0.202319	0.253455	-0.031598	0.552023	0.176599	-0.446078	-0.112986	-0.117516
TCGA-DD-A1EB-01	0.210254	0.224239	0.155103	0.178373	-0.0170303	0.0765108	0.0729577	0.0260229	-0.115727	-0.0838377	0.185006	0.214104	0.133699	-0.174477	0.0235266	0.107023	-0.022364	0.0667279	0.0414496	0.0283528	-0.172436	-0.544426	-0.120099	0.101877	-0.100188	0.090184	0.492857	-0.239185	0.0461725	-0.0926157	0.0514942	-0.389035	-0.0235448	0.0171688	0.00781992	0.287529	0.619948	-0.0341577	-0.259032	-0.0818096	0.188573	-0.268147	0.39869	0.209734	0.494229	-0.0669767	0.0673691	-0.136007	-0.142928
TCGA-DD-A1EC-01	0.250215	0.249558	0.353003	0.302069	0.231946	-0.0475935	0.0438195	0.168364	0.319319	-0.223182	-0.267576	0.0505797	0.315503	-0.114942	-0.182051	0.119743	0.130833	0.402155	-0.24736	0.268769	0.313376	0.304758	0.413251	0.464366	0.114602	0.0217372	0.347408	-0.0236065	0.0980165	0.287249	0.189533	0.608787	0.166283	0.0793729	0.234089	-0.148686	-0.0371667	-0.0713848	-0.395186	-0.0262353	0.00882877	-0.440163	-0.583819	-0.617694	-0.592777	-0.47085	-0.0383542	0.199731	0.154764
TCGA-DD-A1ED-01	-0.484826	-0.508385	0.349711	-0.271876	-0.0022678	-0.124268	-0.610707	-0.262066	0.0291699	0.103664	0.167905	-0.206725	0.00885729	0.125477	-0.0112502	0.114981	-0.553187	0.277013	-0.105583	-0.61879	-0.444633	-0.593867	-0.535702	-0.413392	-0.256032	0.251469	0.0398859	-0.011282	0.279382	-0.272086	0.1163	0.306821	0.195665	0.228432	0.153017	0.114495	-0.0316784	-0.274677	0.104874	-0.136129	-0.178307	0.219079	0.527943	-0.742898	0.678398	0.0919598	-0.556479	-0.335401	-0.510424
TCGA-DD-A1EE-01	0.302037	0.545428	0.172107	0.164087	-0.0702534	0.248113	0.456379	0.129169	0.177693	-0.0905389	0.262938	0.250281	0.266519	-0.26627	0.11269	0.0743273	-0.14732	0.197389	-0.179568	0.691978	0.270426	0.594593	0.265653	0.230785	-0.33113	-0.0800737	0.53208	-0.17008	-0.225137	-0.127486	0.149955	-0.452242	-0.177588	-0.0571437	-0.203062	0.0929569	0.553489	0.352202	0.44743	0.140549	-0.0853916	0.544228	0.109672	0.603371	0.549349	0.416626	-0.339174	0.161756	0.306576
TCGA-DD-A1EF-01	0.404356	-0.298171	0.102212	-0.178385	0.496398	0.00405412	0.0486199	0.222149	0.17371	-0.238718	-0.241423	0.0880436	-0.0778611	0.0883673	-0.38518	-0.0296037	0.458118	-0.266467	0.301627	0.214987	0.449762	0.250409	-0.00537563	-0.093314	-0.306596	-0.0568454	-0.303344	0.00827521	-0.0492806	0.347668	-0.0178485	0.315044	0.00664741	0.0833762	0.0488019	-0.40953	-0.336014	-0.335982	-0.443366	-0.175724	-0.188577	-0.561429	-0.23197	0.530871	-0.33195	-0.34906	-0.391841	0.164583	-0.0282254
TCGA-DD-A1EG-01	0.435364	0.227706	0.221617	0.284151	0.422474	0.249361	-0.0681375	0.060056	-0.00374952	0.0692233	-0.349599	-0.0785706	-0.0372243	0.0743499	0.263701	0.524338	0.268877	0.224295	-0.0568653	0.488667	0.0234663	0.498586	0.227959	0.340315	0.296336	0.0889649	-0.180889	-0.287314	-0.258536	0.519368	0.338826	0.645252	0.265638	0.260476	0.304047	0.0585941	0.407614	0.262957	0.564104	0.204398	0.222283	0.614764	-0.195392	0.555316	-0.0316861	0.160683	0.0919423	0.211694	0.353865
TCGA-DD-A1EH-01	0.510108	0.0848204	0.0988172	0.184913	0.296221	0.0733193	0.465248	0.0951628	0.13839	-0.416701	-0.38583	0.0600195	0.36364	0.0312754	-0.030631	-0.138291	0.643721	-0.0328531	-0.0245458	0.500891	0.417148	0.555338	0.250808	0.172723	-0.27943	0.070689	0.689838	-0.0419916	0.0629889	0.220222	-0.0317228	-0.0195728	0.357996	0.397274	0.351624	-0.227202	-0.319304	-0.313713	-0.360488	0.00315205	-0.0409398	-0.340275	-0.363361	-0.0655364	-0.511898	-0.465272	-0.517564	0.215416	0.234115
TCGA-DD-A1EI-01	0.324922	-0.116609	0.39822	0.401122	0.380262	0.163625	0.280263	0.194983	0.00472675	0.0804464	0.0509935	-0.0352427	0.267908	0.382723	0.332262	0.245382	0.251293	0.136091	0.393746	0.202966	0.123704	0.432693	0.254854	0.146261	0.0394657	-0.0796461	0.176213	0.0203677	0.27974	0.46315	-0.321945	0.166074	0.465895	0.46874	0.469563	-0.0547623	-0.268224	0.21343	0.0739883	-0.0899906	0.370021	-0.0217561	-0.100824	0.126685	-0.222207	0.0502428	-0.194109	0.278078	0.195114
TCGA-DD-A1EJ-01	0.514941	0.497181	-0.0726138	0.528472	0.113674	0.152943	0.51695	0.019029	0.0363532	-0.167402	-0.310551	-0.12788	0.272995	-0.0326625	-0.0923257	-0.0201679	0.55686	-0.0785425	0.274881	0.530357	0.417165	0.488218	0.13421	0.362294	-0.20368	-0.304427	-0.0798816	-0.289749	-0.0418188	0.334917	0.141254	-0.42698	-0.213747	-0.0573979	-0.281866	-0.0462036	0.206655	0.328822	-0.13802	0.336226	0.17495	-0.372053	0.122742	0.72322	-0.562143	-0.366228	-0.121946	0.177991	0.256622
TCGA-DD-A1EK-01	-0.108438	0.184473	0.218914	0.383421	0.0536414	0.135431	-0.413494	-0.17108	0.0557908	0.13424	0.00584839	-0.0537768	0.35961	0.341989	0.396661	0.0123187	-0.332085	-0.0658108	0.0591666	-0.507569	-0.59169	-0.562547	-0.514206	0.411244	-0.276672	0.143685	0.416948	0.101627	0.0582396	0.241475	0.476922	-0.292492	0.0222263	0.09614	0.0690158	0.533268	0.193719	0.386423	0.582617	0.41743	0.573303	0.553418	0.359062	0.445611	0.6078	0.361778	-0.254793	-0.188495	-0.358987
TCGA-DD-A1EL-01	0.254861	-0.0114719	-0.208746	0.112093	-0.317861	-0.0972943	0.369891	0.0277034	-0.114601	-0.312829	-0.444527	-0.351236	0.30334	-0.0853562	0.34035	0.416749	0.401211	0.178485	-0.137137	0.501583	0.350946	0.737281	0.293072	0.0663603	-0.0445428	-0.149524	-0.530409	-0.164544	-0.234557	0.148596	0.0998085	-0.280319	-0.121703	-0.0503246	-0.178992	0.0308981	0.157824	0.272527	0.285853	0.233958	-0.0694318	0.345963	-0.231192	0.0999422	-0.245296	0.0190548	0.11761	0.251875	0.312856
TCGA-DD-A39V-01	-0.219679	-0.313872	-0.21224	-0.315021	-0.00788979	-0.308553	-0.486801	-0.0519871	-0.114618	-0.00755536	-0.112215	-0.245322	-0.3112	-0.096022	0.26365	0.525618	-0.328925	0.0562623	-0.576246	0.0124454	-0.39072	-0.0242845	-0.110135	-0.160239	0.266124	-0.060583	-0.704059	-0.145138	-0.248394	-0.255422	0.333801	0.352334	-0.082127	-0.111722	-0.129901	-0.164166	-0.486286	-0.0576406	0.186941	-0.148433	-0.175135	0.217975	-0.259657	-0.551523	0.00189326	0.166425	0.221147	-0.0308926	0.108566
TCGA-DD-A39W-01	0.123974	0.324496	-0.0946551	0.332178	-0.10104	0.014193	0.251478	-0.127609	-0.0320145	-0.210471	-0.245304	-0.323651	0.20408	-0.162103	-0.560358	0.194346	-0.106935	-0.208577	-0.000482577	0.507813	0.262904	0.454128	-0.221169	0.00763418	-0.256832	0.230924	0.11109	-0.134028	0.211904	-0.312668	-0.119539	-0.515462	-0.120473	0.00584212	-0.139263	-0.0407299	0.236484	-0.183586	-0.0346032	-0.280422	-0.225623	0.0741316	0.454109	0.675345	0.0636259	0.0289872	-0.211664	0.140528	0.0242685
TCGA-DD-A39X-01	-0.294874	-0.0196231	-0.00432728	0.153826	-0.230719	0.16558	-0.283513	-0.00534609	-0.0425009	0.341579	-0.294397	-0.269594	-0.0459347	0.473025	0.359054	0.150518	-0.00333191	-0.0797516	-0.177999	0.340885	-0.511853	-0.0223512	-0.18932	0.0205366	0.408745	0.40398	-0.718363	-0.0488457	0.308033	0.00835863	0.140345	0.104343	0.170099	-0.0436151	0.210789	0.236828	0.0554039	0.223152	0.368118	0.18362	0.172181	0.26657	-0.0245348	0.174389	-0.0807805	0.122768	0.441806	0.141563	0.0805837
TCGA-DD-A39Y-01	0.228965	0.299124	-0.489769	-0.182397	-0.0650815	-0.141856	-0.121849	-0.173772	-0.136852	-0.125768	-0.468147	-0.483717	-0.213908	0.133768	-0.167125	-0.0166333	0.243386	0.228091	0.401195	0.634252	0.186103	0.501424	0.288374	0.215939	0.0572521	-0.0819409	-0.232355	-0.241015	-0.298333	0.248992	0.170833	-0.397947	-0.381404	-0.425303	-0.384585	0.0665996	-0.0371146	0.249936	0.258738	0.152172	0.340934	0.291228	-0.517518	0.305017	-0.574194	-0.0722423	0.408928	0.181355	0.401687
TCGA-DD-A39Z-01	0.0788507	0.146469	-0.459848	0.196275	-0.168433	-0.0220002	0.105203	-0.112928	-0.138782	-0.226147	-0.0595896	-0.129716	-0.380333	0.132361	-0.362611	0.0779807	-0.365261	-0.295097	0.0101044	0.0548808	-0.353076	-0.0953147	-0.0898344	-0.0276608	0.120235	-0.0485702	-0.631845	-0.364827	-0.240419	-0.435231	-0.233894	-0.532637	-0.429424	-0.501964	-0.483109	-0.083157	-0.256224	-0.350713	-0.0685419	-0.474075	-0.283358	-0.107282	0.0188108	0.175517	-0.334267	-0.083387	0.505958	-0.0848812	0.0606932
TCGA-DD-A3A1-01	-0.10046	-0.260272	-0.255761	-0.278479	-0.205823	-0.0200756	-0.431864	-0.158247	-0.2664	0.155599	-0.371928	-0.254387	-0.279486	0.208109	0.266787	-0.0243661	-0.0640807	0.00842337	-0.247561	0.312512	-0.397532	-0.151024	0.0407571	0.146673	-0.0233143	0.0432702	-0.0651989	-0.39938	-0.354853	-0.159583	0.145821	0.0402688	-0.359138	-0.483019	-0.439301	0.23443	0.142548	0.105917	0.394728	0.218586	0.0294992	0.460122	0.294834	0.323328	0.14271	0.36792	0.368865	-0.14059	0.122548
TCGA-DD-A3A2-01	-0.660715	-0.525725	-0.298562	-0.227824	-0.453784	-0.0653549	-0.512636	-0.462989	-0.387882	0.0616084	-0.0337595	-0.270943	-0.174667	-0.50127	-0.568837	-0.304239	-0.476815	-0.0492077	-0.179454	-0.570723	-0.651281	-0.685533	-0.552606	-0.523817	0.0444242	-0.189075	-0.285419	-0.0621435	0.117387	-0.628513	-0.310313	-0.581648	-0.45907	-0.46654	-0.436787	0.330387	0.563265	-0.160251	-0.0822314	-0.21497	-0.106761	-0.0439467	0.698574	0.114956	0.515343	0.13312	0.326235	-0.460979	-0.478869
TCGA-DD-A3A3-01	-0.0789517	0.164262	-0.458621	-0.105152	-0.4003	-0.169071	-0.441333	-0.0343538	0.0487969	0.194539	0.14139	0.210009	-0.185409	0.124197	0.409873	-0.00672402	-0.228857	-0.111846	-0.337913	-0.484618	-0.571789	-0.514389	-0.385041	-0.0433938	0.416799	-0.0988036	-0.793223	-0.0333021	-0.0143913	-0.306166	0.20192	-0.429865	-0.205418	-0.290898	-0.256552	-0.144706	-0.479604	-0.194935	0.310262	0.00280274	-0.0716202	0.298861	-0.131714	0.381393	0.235305	0.253625	0.437008	-0.262531	-0.180674
TCGA-DD-A3A4-01	0.12822	0.422932	0.100638	0.475372	-0.535387	-0.174041	-0.096144	-0.311109	-0.0818474	-0.13291	0.145885	-0.0574682	0.0587401	-0.374545	-0.329982	0.518634	0.159288	0.464037	0.124671	0.00409594	0.0243131	-0.63951	-0.391463	0.0892605	-0.286561	0.0696875	-0.432536	-0.138244	0.493226	-0.270573	0.0562522	-0.554765	-0.236164	-0.317273	-0.240977	0.197066	0.182048	0.303681	0.59315	-0.0666279	0.145414	0.600628	0.476015	-0.373311	0.0532218	0.260856	-0.353735	0.0463142	0.00248776
TCGA-DD-A3A5-01	-0.00420473	-0.113272	-0.286161	-0.153736	0.0521767	-0.0260561	0.0639715	-0.207507	-0.283956	0.0229077	-0.00632537	-0.0753912	-0.220599	-0.197634	-0.10522	0.196888	-0.337398	0.0595274	0.0650458	-0.446941	-0.0364551	-0.189177	-0.0701095	-0.129095	0.139483	0.0707661	0.151529	-0.152868	0.142352	-0.0522154	0.316835	-0.202812	-0.128752	-0.143639	-0.102394	0.13098	0.157191	0.338932	0.399014	-0.0659386	-0.112207	0.173562	0.247408	0.354836	0.590643	0.336474	0.424323	-0.00426395	0.0736028
TCGA-DD-A3A6-01	-0.666617	-0.588012	-0.074121	0.108964	-0.284143	-0.274356	-0.654101	-0.181019	-0.41064	-0.188416	-0.600221	-0.502619	-0.339828	-0.138397	0.191611	0.0439798	-0.273407	-0.114186	-0.571712	-0.661222	-0.432219	-0.638222	-0.165174	-0.130937	0.418226	0.0106446	-0.333177	0.151234	-0.231996	-0.169841	-0.190906	0.221573	0.204737	0.110445	0.318042	-0.351855	-0.622892	-0.199352	-0.642482	-0.257955	-0.18883	-0.727669	-0.674505	-0.667405	-0.582586	-0.557985	0.33955	-0.218342	-0.527212
TCGA-DD-A3A7-01	-0.435905	-0.582732	-0.392667	-0.171655	-0.49518	-0.394966	-0.506905	-0.228096	-0.331078	-0.0990938	-0.303909	-0.154665	-0.486214	0.177891	-0.106035	-0.153336	-0.105898	-0.243922	-0.340231	-0.112251	-0.438711	-0.526707	-0.229581	-0.217092	0.228951	-0.286007	-0.521889	-0.296716	-0.416315	-0.412511	-0.111983	-0.237622	-0.268687	-0.434872	-0.34734	-0.277783	-0.49576	-0.0207531	-0.00649209	-0.00895349	-0.0452361	-0.167535	-0.441375	-0.481691	-0.317223	0.0208368	0.47063	-0.128422	-0.0201696
TCGA-DD-A3A8-01	-0.117967	0.289813	-0.395298	0.292703	-0.0766986	0.025335	0.18521	-0.106358	-0.213194	-0.0506387	0.0384879	-0.171691	-0.0389938	-0.196387	-0.13372	0.15976	-0.465128	-0.0414664	0.0865484	-0.102958	-0.369937	-0.240455	-0.35536	-0.0723383	0.102848	0.686602	-0.216704	0.0113191	0.346821	-0.452102	0.0414502	-0.525048	-0.13832	0.011998	-0.142757	0.204641	0.546153	-0.165599	0.386321	-0.219242	0.102062	0.516304	0.664165	0.555691	0.706585	0.575426	0.415766	-0.118453	-0.223909
TCGA-DD-A3A9-01	0.136476	0.183076	0.275087	0.120364	0.203534	-0.0489211	0.228136	0.146969	0.10428	-0.0341524	-0.229134	0.0451294	0.0389847	0.346058	0.11535	0.294092	0.365348	-0.192926	0.251532	-0.159665	-0.16818	-0.164877	0.30638	0.173416	0.450759	0.13803	-0.0940267	0.177919	0.0971877	0.435542	-0.19143	0.359037	0.390441	0.343468	0.409589	-0.172521	-0.164155	-0.153305	-0.609746	-0.13709	0.00737148	-0.663857	-0.307426	-0.599594	-0.523845	-0.422655	0.442499	0.17915	0.131314
TCGA-DD-A4NA-01	0.177868	0.0105121	0.248598	-0.00405222	0.039252	-0.29194	0.309686	-0.00469042	0.173649	-0.479133	-0.515357	-0.304448	0.298975	0.0575846	-0.00267912	-0.0832076	-0.196705	-0.00423473	-0.178723	0.266403	0.422432	0.364854	0.415869	0.252508	0.101423	-0.406927	0.426566	0.217527	-0.288475	0.365746	0.237355	-0.0303873	0.269249	0.270459	0.282227	-0.230787	0.0676596	-0.0619767	-0.707584	-0.0106146	-0.124315	-0.804725	-0.719797	-0.630526	-0.74574	-0.662178	-0.0666627	-0.0836771	-0.102019
TCGA-DD-A4NB-01	-0.216902	-0.267076	0.461893	-0.0679794	0.239476	0.0891707	-0.287911	0.112841	0.166384	-0.0736717	-0.259001	-0.0277965	-0.0145322	0.0336595	0.16978	0.413881	-0.0897224	0.0405114	-0.296344	-0.459422	-0.0581328	-0.317826	-0.130225	-0.0556024	0.0613628	-0.2427	0.135251	0.254151	0.193708	0.0398381	-0.177755	0.233255	0.392463	0.325152	0.455048	0.0563951	0.455941	0.299296	-0.0235576	0.122415	-0.210902	-0.0363455	-0.110687	-0.606282	-0.459618	-0.13333	-0.318053	-0.0474656	-0.317976
TCGA-DD-A4ND-01	-0.323952	-0.543637	0.435614	-0.274815	0.0480276	-0.0759778	-0.284608	0.23179	0.300463	0.0416973	0.121163	0.26319	0.145878	-0.00478304	0.135834	-0.131112	-0.0976519	-0.0225624	0.141228	-0.539362	-0.128075	0.0784011	-0.316299	-0.253348	-0.156949	0.244976	0.569809	0.445432	-0.0122822	-0.223066	-0.169065	0.231711	0.42607	0.38237	0.431745	-0.381557	-0.364513	-0.450214	-0.654648	-0.170234	0.0692946	-0.663858	-0.387835	0.220535	-0.474011	-0.512746	-0.569503	-0.133267	-0.382804
TCGA-DD-A4NE-01	-0.08276	0.214079	-0.195691	-0.21976	0.0929194	0.23015	0.171407	-0.0309177	0.0208714	-0.173086	-0.135499	0.146061	0.215406	-0.0625865	-0.36503	-0.534815	-0.111987	0.0533726	0.197443	-0.0618023	0.0768689	-0.0607234	-0.027676	-0.244856	-0.104145	-0.184344	0.341006	0.231124	0.135726	0.103189	-0.351084	-0.588544	0.0735528	0.0894574	0.0922445	0.39243	0.386966	0.192932	0.445344	-0.0810145	-0.167811	0.480057	0.312555	0.383359	0.190066	0.151672	-0.294065	-0.0214989	-0.00115808
TCGA-DD-A4NF-01	-0.124517	0.292297	-0.13958	0.073624	-0.26149	0.166222	0.382387	-0.163151	-0.282926	-0.307675	-0.0587033	-0.436375	0.12587	-0.177516	-0.169227	0.146596	-0.1343	0.0345069	-0.0781068	0.0513057	0.39869	0.16796	-0.32521	-0.172075	-0.172938	0.515712	0.286394	-0.135523	0.0860576	-0.400382	0.117753	-0.609442	-0.171666	0.00703449	-0.163374	0.00354522	0.528096	-0.351505	0.329313	-0.225318	-0.0437537	0.501774	0.631111	0.347541	0.492558	0.422444	-0.15358	-0.150563	-0.320699
TCGA-DD-A4NG-01	-0.543858	-0.373953	-0.0523141	-0.394083	-0.409989	-0.147191	-0.509542	-0.174081	-0.288892	-0.379369	-0.310263	-0.277803	-0.0777228	0.251719	0.538962	-0.136524	-0.477735	-0.195615	-0.515486	-0.4711	-0.334198	-0.5262	-0.392761	-0.453603	-0.27412	-0.101609	-0.482223	-0.11321	-0.151908	-0.33126	-0.335633	-0.022459	-0.0995469	-0.0524915	-0.182455	-0.14122	-0.395895	-0.467999	-0.051727	-0.283043	-0.425847	0.264117	-0.265877	-0.521782	-0.215625	0.189386	-0.475746	-0.399615	-0.503411
TCGA-DD-A4NH-01	0.180698	0.273834	0.0964373	0.381637	0.316903	-0.214008	0.257626	0.16474	0.101984	-0.280661	-0.37219	-0.0931924	0.408354	0.436471	0.472213	0.449922	0.474147	-0.186672	0.11365	-0.447359	0.260914	0.0171796	-0.0110988	0.262919	-0.134915	0.173112	0.103261	-0.102009	-0.412295	0.332106	-0.22522	-0.327333	0.293317	0.114834	0.147726	-0.523149	-0.659463	-0.500388	-0.644091	-0.236993	0.0319575	-0.665761	-0.797632	-0.449176	-0.731351	-0.599781	-0.344612	-0.0646474	-0.10683
TCGA-DD-A4NI-01	-0.588908	-0.64981	-0.0382567	-0.453211	-0.640882	0.030358	-0.519776	-0.195016	-0.125654	0.142019	0.487578	0.0912184	-0.453227	-0.364331	-0.703654	-0.443337	-0.391881	0.451566	-0.12571	-0.701605	-0.406628	-0.648837	-0.584065	-0.537682	-0.400885	0.203775	0.112493	0.160923	0.137878	-0.487211	-0.0772981	0.401267	-0.0124396	-0.0480033	0.0712688	0.221157	-0.134606	-0.426951	0.509411	-0.405373	-0.0551793	0.560808	0.374296	-0.53704	0.61029	0.46537	-0.501495	-0.390498	-0.568571
TCGA-DD-A4NJ-01	0.202848	0.247278	0.00276388	0.282766	-0.0540881	0.0044699	0.396204	0.0226337	0.109662	0.0112606	-0.161598	-0.12369	0.102804	0.20619	0.0200637	-0.0116246	-0.165222	0.242072	0.35512	0.163748	0.0419956	0.49073	0.176787	0.339199	-0.175775	-0.17529	-0.16032	0.207571	0.105198	0.0727058	0.243054	0.393631	0.21653	0.238415	0.190711	-0.226107	-0.0890058	-0.321931	-0.415312	0.0624623	0.334387	-0.436304	-0.374863	0.190858	-0.281744	-0.340589	-0.392754	0.0787866	0.110659
TCGA-DD-A4NK-01	-0.24889	-0.090244	-0.302315	-0.130399	-0.382628	0.0705512	-0.300503	-0.124757	-0.103307	0.0471301	0.391029	0.224325	-0.268689	-0.315867	-0.549534	-0.4941	-0.417753	0.231929	0.0915466	-0.0145122	-0.227877	-0.0521481	-0.0978171	-0.212024	-0.411674	0.348412	0.162305	0.0721293	-0.022701	-0.506114	-0.184766	-0.554832	-0.159323	-0.0740203	-0.132035	0.243654	0.560635	-0.103602	0.327805	-0.22979	0.128152	0.295396	0.528487	0.660611	0.594607	0.326885	-0.38828	-0.180854	-0.241991
TCGA-DD-A4NL-01	-0.484693	-0.413927	0.0652409	-0.431238	-0.282764	0.116833	-0.626049	-0.12413	0.205329	0.395643	0.540452	0.499388	-0.139054	0.0758814	-0.193468	-0.367225	-0.626006	0.333869	-0.0468908	-0.719393	-0.532569	-0.655475	-0.602145	-0.545993	-0.305585	0.506988	-0.198645	0.352243	0.177962	-0.467952	-0.139363	-0.342852	0.167059	0.202801	0.171432	0.37452	-0.0184591	-0.157416	0.235457	-0.0775045	-0.00309187	0.439204	0.592816	0.183392	0.742892	0.420673	-0.621455	-0.341714	-0.568868
TCGA-DD-A4NN-01	0.251195	0.325517	-0.279865	-0.0471511	-0.064808	-0.140846	0.410015	-0.0597515	-0.260331	-0.363972	-0.433167	-0.264644	0.0976549	0.151743	0.164892	-0.20869	0.514698	-0.390836	-0.181524	0.267914	0.236887	0.422368	0.187054	0.0478624	-0.0533768	-0.313741	-0.353773	0.0281282	-0.247122	0.243351	-0.312696	-0.552067	0.291709	0.308893	0.292928	-0.31347	-0.418589	-0.286355	-0.638551	-0.151114	-0.271011	-0.686365	-0.514272	0.10851	-0.678425	-0.596707	-0.15778	0.158449	0.110786
TCGA-DD-A4NO-01	-0.0479961	0.401919	0.225776	0.0589085	-0.242868	0.158305	0.0670751	0.0392571	0.141859	0.174392	0.237529	0.145102	-0.0204804	0.0710251	0.572415	0.418743	-0.092383	0.153303	0.166255	-0.122834	0.291274	-0.0190242	0.079866	0.0295683	-0.144152	0.274274	-0.191244	-0.0306267	0.166808	-0.134338	-0.379817	-0.401712	0.193801	0.0736101	0.224799	0.174183	0.496254	0.334425	0.448261	-0.143803	-0.24939	0.514529	-0.0206076	0.507638	0.61631	0.407175	-0.342221	-0.161636	-0.262315
TCGA-DD-A4NP-01	-0.415064	-0.453834	-0.284599	-0.0184516	-0.295147	-0.324766	-0.428236	-0.2661	-0.134223	-0.016303	0.14931	-0.191925	-0.19433	-0.0847915	-0.37069	0.104301	-0.563757	0.225583	0.0222037	-0.543028	-0.479164	-0.549029	-0.557226	-0.421935	-0.21192	0.463005	-0.638684	-0.140107	-0.00225407	-0.545304	-0.0947275	-0.545392	-0.23551	-0.21955	-0.334864	0.0786576	0.0930526	-0.216518	-0.0766121	-0.309576	-0.179799	0.143649	0.518888	-0.617949	0.684649	0.265912	-0.162533	-0.448029	-0.479169
TCGA-DD-A4NQ-01	-0.138291	0.213077	-0.0240609	0.0813788	-0.0688563	-0.246304	-0.259181	-0.0145052	-0.0705707	-0.21538	-0.285246	0.0792929	-0.131205	-0.232487	-0.0682657	-0.10555	0.0736117	0.199546	0.0437336	0.0478237	0.0726605	-0.0303901	-0.0566397	0.0992785	-0.0862546	-0.230646	-0.473452	-0.173324	-0.430412	0.0684168	-0.13741	-0.359509	-0.0901097	-0.152245	-0.164893	0.0867651	0.375897	0.373444	0.171398	0.224772	-0.0177996	0.181071	-0.490568	-0.0782245	-0.677005	-0.172089	0.0605685	0.0960751	0.123481
TCGA-DD-A4NR-01	0.231298	0.275135	0.176051	0.00717295	0.15408	0.0363453	-0.1275	0.179893	0.346702	0.144386	-0.0356227	0.400301	0.211935	0.272474	0.495547	0.504301	0.307473	-0.269076	0.133966	0.45085	0.0299175	0.307911	0.223801	0.417953	-0.25279	-0.318931	-0.56441	0.0446782	-0.484164	0.323762	-0.0289296	0.614845	0.155448	-0.0112133	0.175511	-0.195156	-0.418986	-0.0940778	-0.401342	0.244655	0.209831	-0.58594	-0.562154	0.478867	-0.606652	-0.528403	-0.439573	0.130825	0.272277
TCGA-DD-A4NS-01	-0.257782	-0.202872	0.479416	0.28784	0.370672	0.155389	0.0253046	0.250954	0.0216315	0.155495	0.00106741	-0.224617	0.233776	0.470843	-0.0855974	-0.12709	-0.200775	0.325837	-0.0548934	-0.291465	0.213481	-0.14016	0.281472	0.0218149	-0.133416	0.144157	0.463152	0.154032	0.106075	0.294173	-0.294738	0.502015	0.56816	0.614876	0.583352	0.0435845	-0.467047	-0.301762	-0.163822	-0.0128365	0.0807613	-0.0173207	0.171393	-0.620538	0.191239	-0.246312	-0.654496	0.037197	-0.274211
TCGA-DD-A4NV-01	0.276341	-0.101609	0.323797	0.368168	0.315321	0.234701	-0.0853865	0.0640264	-0.00347188	0.185257	0.232111	0.240537	0.316094	-0.0564616	-0.0173709	0.182677	0.267863	0.16932	-0.0146149	-0.122734	0.152719	0.0193586	0.110725	-0.0591506	-0.298349	0.232771	0.328572	-0.0823836	0.0379546	-0.260098	-0.0795416	-0.381067	0.268776	0.146841	0.299948	0.223788	0.404782	0.0729911	0.0728541	0.189959	0.332982	-0.102361	0.430002	0.203091	0.465949	0.0734935	-0.422921	-0.0166299	-0.17634
TCGA-DD-A73A-01	-0.288215	-0.668667	-0.171857	-0.382359	-0.344779	0.273885	-0.560492	-0.103348	0.00290439	0.119064	0.277021	0.205322	-0.315138	-0.0574122	-0.562924	-0.485966	-0.533393	-0.172238	0.11083	-0.525381	-0.523141	-0.477519	-0.46892	-0.434223	-0.328403	0.0635544	-0.203367	0.198279	0.20863	-0.399441	0.0677747	0.183069	-0.263519	-0.200664	-0.203191	-0.0404567	-0.138451	-0.367232	0.564523	-0.263289	-0.329048	0.658116	0.50024	-0.137175	0.323191	0.242425	-0.432442	-0.438506	-0.389088
TCGA-DD-A73B-01	-0.123381	-0.0322867	-0.322135	-0.273029	-0.298164	-0.0470218	0.188307	-0.288361	-0.260236	-0.0708323	0.0564323	-0.130051	0.135832	-0.369133	-0.616048	-0.462478	0.347284	0.172496	0.32065	-0.303215	0.220633	0.107661	0.0885512	-0.092249	-0.109572	-0.0705565	0.027669	-0.0799478	0.434457	-0.0208191	0.0786755	-0.481922	-0.446889	-0.380052	-0.466804	0.231594	0.531539	0.163854	0.0804835	-0.0943076	-0.0402558	0.036641	0.10683	0.441194	0.534088	0.256197	0.324958	-0.00312565	0.0787579
TCGA-DD-A73C-01	0.269858	0.0862965	0.0484657	0.217742	-0.0246049	0.113097	0.207421	0.0493597	0.0230152	-0.0390601	-0.323111	0.115041	0.16825	-0.304558	0.202999	0.347536	-0.00156269	0.156805	0.352978	0.541729	0.0234869	0.0697565	0.05376	0.147249	-0.0518074	0.128984	0.250723	0.109809	0.168197	-0.310192	-0.160231	-0.361116	-0.0437582	-0.0169701	0.0124221	0.299572	0.755851	0.14417	-0.478767	0.158571	0.243577	-0.430039	0.655147	0.468956	0.573539	-0.248734	0.0761216	0.0646118	-0.124054
TCGA-DD-A73D-01	-0.271819	0.0145372	-0.390565	-0.15965	-0.412572	-0.105777	0.21666	-0.256068	-0.187602	-0.0641401	0.307863	-0.14666	-0.284	-0.231722	-0.557123	-0.492513	-0.179617	-0.0173152	0.0355468	0.0157789	0.24036	-0.359008	-0.142578	-0.297721	-0.451744	-0.512922	0.0752651	-0.271132	-0.0140143	-0.408922	-0.079668	-0.607793	-0.535112	-0.509008	-0.578239	-0.0752175	-0.043181	-0.272562	0.539028	-0.322521	-0.35444	0.719421	0.589182	0.0444942	0.660855	0.559895	-0.0589293	-0.206116	-0.00597602
TCGA-DD-A73E-01	0.477332	0.572395	-0.251118	0.391715	-0.186215	-0.0117247	0.579618	-0.127771	-0.136735	-0.232081	-0.171577	-0.190995	0.21836	-0.300625	-0.165535	-0.0209026	-0.240149	0.0924599	0.0924609	0.496772	0.307065	0.431325	0.256338	0.265626	-0.261201	0.434414	0.269515	-0.289249	-0.277008	-0.266011	-0.27704	-0.619771	-0.274147	0.056909	-0.214576	0.0738792	0.419391	0.149954	0.463574	0.0763038	0.0563073	0.536943	0.6084	0.232645	0.472517	0.315033	0.109095	0.213599	0.284101
TCGA-DD-A73F-01	-0.187093	-0.391591	0.052823	-0.433641	-0.116602	0.15412	-0.502357	-0.0584047	0.0429445	0.0240986	0.120121	0.122817	-0.232219	-0.242676	0.0488254	-0.182988	-0.231802	-0.208453	0.303817	0.0675295	-0.355687	-0.385409	-0.381702	-0.215359	-0.212608	0.152306	-0.21848	-0.16678	0.321178	-0.0597794	0.514703	0.521482	-0.183493	-0.0999143	-0.101465	0.267426	0.423767	0.0767325	0.218247	0.141825	0.305865	0.31832	0.297814	0.695201	0.42938	0.239532	-0.209946	-0.00782785	-0.0842324
TCGA-DD-A73G-01	-0.223867	-0.100197	-0.184945	-0.325451	-0.118772	-0.126454	-0.307498	-0.0537707	-0.149144	-0.0110193	-0.0997478	0.0531756	-0.318562	0.00350022	-0.0111858	0.0943245	-0.20042	-0.532324	-0.269413	-0.22145	-0.490137	-0.477227	-0.125582	-0.180569	0.452681	-0.0166068	-0.70248	-0.243751	-0.181052	-0.266278	0.0363696	-0.37465	-0.156666	-0.400362	-0.118215	-0.139793	-0.248359	-0.130281	-0.492617	-0.0896339	0.00457533	-0.532883	-0.184231	0.346906	-0.303674	-0.0715599	0.455758	-0.196826	-0.10462
TCGA-DD-AA3A-01	-0.127598	-0.381704	0.140058	-0.0434186	0.240156	-0.343765	0.0709925	-0.158294	-0.112795	-0.375961	-0.544866	-0.469158	-0.207067	-0.0208466	-0.193052	-0.0358999	-0.303383	-0.481756	-0.629875	0.304297	0.457514	0.557334	0.449231	-0.174455	0.0272972	-0.479919	-0.0634282	0.14701	-0.214982	0.233948	0.00231591	-0.382851	-0.0519209	0.0413756	-0.00458062	-0.513421	-0.442393	-0.381744	-0.455189	-0.149307	-0.228344	-0.600505	-0.744822	-0.73341	-0.766844	-0.57666	0.0370012	0.203828	0.227298
TCGA-DD-AAC8-01	0.287725	0.373778	-0.0852619	0.361409	-0.128016	-0.0964584	0.349404	-0.0851322	-0.339683	-0.428431	-0.576493	-0.6386	0.231708	-0.332704	0.105475	0.301525	0.328471	-0.0451207	-0.384705	0.506869	0.47271	0.314386	0.468057	0.180793	-0.0235605	-0.265948	-0.0759127	-0.0950712	-0.37607	0.266211	-0.176004	-0.480971	0.0185373	0.0795622	-0.0421676	-0.0541643	0.0918502	-0.0124237	-0.0757555	0.142416	-0.341532	-0.0941424	-0.25156	0.206985	-0.393192	-0.151325	0.214478	0.201861	0.146631
TCGA-DD-AAC9-01	-0.562943	-0.411613	0.14854	-0.50873	-0.0872378	-0.233975	-0.656809	-0.160964	-0.100249	0.496147	0.50846	0.282405	-0.46548	-0.13955	-0.0826611	0.096957	-0.590565	0.144301	-0.464095	-0.59331	-0.629456	-0.678874	-0.55301	-0.389711	0.216828	-0.0126175	-0.706729	-0.00180677	0.176053	-0.33665	-0.0235653	0.498447	0.0653534	-0.242534	0.0925896	0.198454	0.180038	0.0216761	0.131981	-0.235456	-0.325004	0.296947	0.264933	0.566678	0.517502	0.32445	0.17531	-0.373861	-0.427353
TCGA-DD-AACA-01	0.343877	0.532247	-0.230836	0.474549	0.019846	0.205279	0.325198	0.207193	-0.127821	-0.307039	-0.15923	-0.0963443	0.297533	-0.297897	0.0324397	0.156328	-0.269544	0.0852547	-0.291416	0.154913	0.422473	0.616088	0.0947318	0.145885	-0.0902789	0.0647129	0.396824	-0.034802	0.116326	-0.125611	-0.0495012	-0.328454	-0.0707185	0.169	-0.102207	-0.158239	0.201079	0.0745484	-0.0687758	-0.235555	-0.0328954	-0.0138436	0.279431	0.428062	-0.00193951	0.0488971	0.170258	0.244215	0.245345
TCGA-DD-AACB-01	0.102735	0.341462	-0.382169	0.244518	0.399088	-0.0666117	0.166438	0.207941	0.204477	-0.0992846	0.0300462	0.00880622	-0.00800875	-0.0149964	0.500761	0.576024	-0.0133442	-0.259324	0.368957	0.293912	0.0751052	0.324652	0.209838	0.130357	0.257442	0.0203232	-0.157359	-0.0703867	-0.00688668	0.137697	0.344355	0.701318	-0.0881613	-0.159898	-0.17134	0.199348	-0.234607	0.226128	0.260025	0.184955	0.307453	0.154786	-0.0562887	0.325736	-0.113178	0.189567	0.251327	-0.00507345	0.115597
TCGA-DD-AACC-01	-0.150908	-0.272476	0.291337	-0.134508	0.216108	-0.123801	-0.444964	0.0411652	0.159883	0.437541	0.353345	0.347663	-0.132662	0.338276	0.00341397	0.323692	0.115725	0.0590434	0.21347	-0.518178	-0.269072	-0.355408	0.00585538	0.0559073	0.112613	0.217779	-0.179754	0.183967	-0.0456673	0.126805	0.423524	0.759674	0.11247	-0.184632	0.222146	-0.0951291	-0.617878	-0.220873	-0.608868	0.0298993	0.102271	-0.685459	-0.0914851	0.470278	-0.372225	-0.402657	-0.170083	-0.100945	-0.0940414
TCGA-DD-AACD-01	-0.469663	-0.747091	-0.0580822	-0.378358	-0.23562	-0.187018	-0.565593	-0.101452	0.134212	0.196866	0.268863	-0.0620176	-0.405945	0.130816	0.185529	0.145582	-0.436846	-0.256335	-0.560086	-0.240138	-0.48556	-0.722104	-0.450885	-0.38158	0.441687	-7.14e-05	-0.771274	-0.0668117	-0.214948	-0.390478	0.518898	0.0745534	-0.140665	-0.199538	-0.142291	-0.0773888	-0.174795	-0.156726	-0.313376	-0.215062	-0.325555	-0.360577	-0.164195	0.136848	0.523378	0.0735488	0.468763	-0.181671	-0.275752
TCGA-DD-AACE-01	-0.169636	-0.210823	-0.386943	-0.355472	-0.114029	-0.14748	-0.429061	-0.351305	-0.414227	-0.438774	-0.0747415	-0.163769	-0.22592	0.0767847	-0.630914	-0.444147	-0.431404	-0.176545	0.183949	-0.206413	-0.113868	0.142234	-0.13986	-0.276373	-0.044983	0.0351967	0.571864	-0.0687273	-0.159952	-0.285218	-0.231002	-0.444625	-0.315253	-0.31053	-0.261712	0.0245757	0.19144	-0.0420698	0.115631	-0.0320968	-0.0252027	0.0123048	0.164364	0.371771	0.349661	0.177681	0.105978	-0.323357	-0.362591
TCGA-DD-AACF-01	0.336418	-0.110101	-0.125739	-0.0367161	-0.197412	-0.143319	0.494684	-0.301857	-0.272774	-0.0695648	0.187327	-0.39108	-0.200847	-0.132961	-0.321947	-0.596583	0.379804	0.167878	-0.291734	0.121906	0.232761	0.2073	0.238571	0.0881514	0.215161	-0.235067	-0.30645	-0.104299	0.111314	0.0550646	0.278168	-0.0776074	-0.215679	-0.133167	-0.192835	-0.110532	0.218628	0.179745	-0.309482	0.267432	0.171381	-0.418931	-0.33167	-0.387844	0.369184	-0.0347078	0.457762	0.055387	0.358418
TCGA-DD-AACG-01	-0.305686	-0.529304	-0.477853	-0.532474	-0.545988	-0.0876167	-0.427942	-0.106365	-0.0657647	0.0567404	0.0635943	-0.0264363	-0.32215	-0.235604	-0.485324	-0.149991	0.274821	0.0984958	0.290248	-0.509572	-0.234245	-0.146502	-0.288353	-0.342661	0.155377	-0.503077	-0.767583	-0.360264	-0.363891	0.0288168	0.446472	0.160726	-0.373827	-0.336637	-0.447818	0.0592578	-0.513508	0.228106	-0.177906	-0.017892	-0.259799	-0.186895	-0.0626532	0.20208	-0.484014	-0.295281	0.229782	-0.108513	-0.0177883
TCGA-DD-AACH-01	0.439902	0.243923	0.233516	0.374912	0.449221	0.0322822	0.439619	0.128466	0.259181	-0.149871	-0.103833	0.0064552	0.0844959	-0.0946984	0.186027	0.177321	0.243574	0.179091	0.0504202	0.47893	0.221511	0.62442	0.221866	0.284469	0.0289256	-0.208739	0.706386	-0.162732	-0.524196	0.325674	-0.21091	-0.13435	0.235559	0.347655	0.200828	0.140107	0.341157	0.433089	0.299652	0.359763	0.381988	0.451093	-0.234369	-0.542862	-0.570921	0.11338	0.0400684	0.375929	0.436857
TCGA-DD-AACI-01	-0.117933	-0.0867603	-0.0144451	-0.0415975	-0.419924	-0.220098	-0.182779	0.119315	0.171998	0.425198	0.198686	0.127863	-0.188112	0.195734	0.3977	0.117632	0.12761	0.205575	-0.219178	0.217216	-0.43877	-0.519312	0.195548	0.239971	0.519999	0.108601	-0.560768	-0.208128	-0.0469068	0.222061	0.316047	0.606886	0.226301	-0.184857	0.177209	-0.239777	-0.244896	-0.0912862	-0.135765	0.192468	-0.241182	-0.179671	-0.315126	-0.42986	-0.418723	0.0175747	0.444571	0.0497695	0.0332484
TCGA-DD-AACJ-01	-0.265334	0.131943	-0.547729	-0.0887938	-0.578337	-0.138104	-0.0532409	-0.188893	-0.371891	-0.0906539	-0.292197	-0.302707	-0.235259	-0.201476	-0.354469	-0.332839	-0.0682714	-0.0508941	0.0803129	0.0306647	-0.198693	-0.169913	-0.186338	0.030234	0.120638	-0.277866	-0.488988	-0.267033	-0.180826	-0.463084	0.120303	-0.560054	-0.515755	-0.473625	-0.536586	0.1307	-0.14625	0.151312	0.395547	-0.0920843	-0.156263	0.599391	0.443037	0.327405	0.334591	0.441306	0.515821	-0.192348	-0.120923
TCGA-DD-AACK-01	0.368367	0.345129	0.132521	0.175788	-0.232844	0.278401	0.046459	0.00137442	-0.15656	-0.0654762	0.112423	0.0264707	0.040993	-0.310031	-0.289395	0.209161	0.145698	0.116417	0.190335	0.603913	0.214363	0.259064	-0.266037	0.0713041	-0.469776	-0.0693706	0.216216	-0.0138622	-0.251266	-0.0272868	-0.356696	-0.395007	-0.310997	-0.200375	-0.290418	0.352012	0.532296	0.489821	0.469828	0.21979	0.150235	0.616334	0.63284	0.663189	-0.053692	0.358274	-0.378579	0.120765	0.293999
TCGA-DD-AACL-01	0.111534	0.352447	-0.169757	0.247875	0.442211	-0.0888825	-0.0622888	0.0902928	-0.0266893	-0.188575	-0.27293	-0.159746	0.0399217	0.208717	0.243875	0.455663	0.465289	-0.135398	0.0387054	0.183166	0.429212	-0.175171	0.0853014	0.277643	0.224446	0.296723	-0.390725	0.0189769	-0.443723	0.410458	0.290112	0.521704	-0.0231312	-0.0550605	0.00830568	-0.0778014	-0.345511	0.261289	-0.551843	0.0454459	0.165662	-0.606041	-0.697856	-0.0734819	-0.690309	-0.445612	0.391275	0.20621	0.278537
TCGA-DD-AACN-01	0.182637	0.0236985	0.162068	-0.0941933	-0.0166357	0.0415832	0.304052	0.18996	0.167759	-0.0313474	0.259576	-0.0831504	0.215003	-0.205873	-0.410792	-0.231422	0.581238	0.225021	0.0120693	0.359811	0.315931	0.341185	0.43675	-0.168758	-0.258104	-0.273763	0.56763	0.0196933	0.0523576	0.384326	-0.375154	0.411562	0.360787	0.431941	0.363386	-0.157097	-0.36096	-0.305247	-0.491802	-0.0367375	-0.136781	-0.368299	-0.131805	-0.529671	-0.356975	-0.355469	-0.430878	0.19318	0.0646487
TCGA-DD-AACO-01	-0.257213	-0.555656	-0.192096	-0.313057	-0.0412371	-0.158813	0.0371003	-0.160812	-0.163264	0.417745	0.31035	0.197067	-0.336325	-0.018701	-0.247634	-0.49801	-0.00208213	0.164153	0.387143	-0.357969	-0.450563	-0.338182	-0.204932	-0.319445	0.278265	-0.060296	-0.491326	-0.0507737	-0.206753	-0.313497	0.0799871	0.176687	-0.207854	-0.286421	-0.256614	-0.142041	-0.390357	-0.201974	0.132308	-0.145901	-0.516991	0.18216	0.0776856	0.239059	-0.121259	0.253205	0.290707	-0.132967	0.014762
TCGA-DD-AACP-01	0.451485	-0.0857352	-0.151717	0.27143	0.170596	-0.0434324	0.36727	0.228118	0.20827	-0.0108481	-0.00592814	0.062916	0.112523	0.00373942	0.419424	0.115546	0.363053	-0.250671	-0.1703	0.465235	0.258208	0.365156	-0.119672	-0.133116	0.291005	0.158186	-0.480232	-0.0596409	-0.216857	0.0910388	-0.140494	-0.078617	0.0951804	0.109358	-0.00735353	-0.0966778	-0.293856	0.0854031	-0.419927	0.0576224	0.0146018	-0.486499	-0.50941	0.398138	-0.483204	-0.328474	-0.0535617	0.306517	0.368676
TCGA-DD-AACQ-01	-0.01177	-0.276247	-0.51196	-0.160304	-0.0773601	0.163789	0.37605	0.0509839	-0.275592	0.0423634	-0.121828	0.081534	-0.0344405	-0.0322034	-0.467764	-0.498578	0.116284	0.141723	0.142086	-0.327699	-0.132705	0.0378654	0.211512	-0.31284	-0.44728	-0.46217	0.238655	-0.0933691	-0.477672	-0.487488	-0.569396	-0.582574	-0.449712	-0.523984	-0.486322	-0.0299062	-0.384847	0.0877381	0.2884	0.132994	-0.0402202	0.503602	0.195482	-0.0821123	0.102981	0.268005	-0.470013	-0.204239	0.113516
TCGA-DD-AACS-01	0.355876	0.31687	-0.00808935	0.472696	-0.176361	0.28401	0.565014	0.0533304	-0.0698675	0.00699759	0.219371	0.164653	0.346636	0.346736	0.358189	-0.167705	0.410612	0.378313	0.156778	0.0916645	0.404897	0.499252	0.424239	0.237585	-0.364789	0.168464	0.233475	-0.00648729	0.138031	0.203791	-0.288437	-0.47014	-0.220395	-0.168247	-0.216758	-0.0168451	0.160337	0.421866	0.167375	0.13755	0.0287736	0.149837	0.349158	0.226454	0.301614	0.071401	-0.263883	0.11722	0.252657
TCGA-DD-AACT-01	0.0104606	0.408582	0.0794963	-0.25837	-0.0963585	-0.0702665	-0.558944	0.202856	0.244336	0.279562	0.435306	0.34477	0.177029	0.308848	0.12663	0.0778824	-0.102338	-0.175984	-0.29486	-0.299332	-0.326845	-0.603969	0.0532959	0.111989	-0.0131261	-0.209836	-0.522406	-0.105928	0.0143201	-0.130484	0.169332	0.664966	-0.0828444	-0.293566	-0.0357276	-0.244468	-0.0686375	-0.355193	0.317173	-0.0725037	0.0783956	0.155665	0.108626	-0.353809	-0.102548	0.172343	-0.0836122	-0.19057	-0.305781
TCGA-DD-AACU-01	0.42664	0.670923	0.321147	0.634712	0.412807	0.324944	0.435455	0.394531	0.263552	0.433785	0.483472	0.389613	0.27776	0.146377	0.111506	0.227908	0.364999	0.347821	0.604365	0.452232	0.192802	0.505907	0.522004	0.506663	-0.263604	0.0711026	0.228569	-0.105204	0.0839313	0.429128	-0.132493	0.361803	0.12379	0.216447	0.100253	0.338397	0.556912	0.202563	0.130126	0.309571	0.192923	0.170656	0.482428	0.493563	0.510606	0.301282	-0.15316	0.234468	0.300606
TCGA-DD-AACV-01	0.161346	-0.185915	-0.453792	-0.248933	-0.502393	-0.101175	0.441105	-0.313007	-0.374945	-0.160783	-0.0925141	-0.225104	-0.35556	-0.402039	-0.445014	-0.463337	0.0332387	0.0964529	0.29538	-0.342405	0.305781	0.429828	0.232573	-0.119712	-0.428311	0.09349	0.412948	-0.0721349	0.00325504	0.0337421	-0.261333	-0.497846	-0.435063	-0.383944	-0.457975	-0.020797	0.158158	0.275648	0.170535	-0.0384567	-0.14344	0.121709	0.125854	0.410314	0.425245	0.145496	-0.21626	-0.0822841	0.177092
TCGA-DD-AACW-01	-0.00191053	-0.244162	-0.322464	0.0107515	-0.175163	0.032519	0.385835	0.0527006	0.100863	-0.276045	-0.3128	0.0824671	-0.0484783	-0.179709	-0.34394	-0.348083	0.576979	0.118605	0.347045	0.0329882	0.321118	0.52903	0.032591	-0.195784	-0.24292	0.275251	-0.445999	0.0169957	-0.148256	-0.0567816	-0.220802	-0.130952	-0.35749	-0.187924	-0.404834	-0.261999	-0.158818	-0.158477	-0.415215	-0.362241	-0.248817	-0.436827	0.140488	0.47192	-0.210445	-0.296116	-0.10218	0.0479563	0.170297
TCGA-DD-AACX-01	-0.13237	0.685302	-0.226324	0.616765	-0.551302	-0.0574824	-0.162621	-0.165057	-0.219483	-0.246521	-0.358532	-0.460728	0.351489	-0.260856	-0.138079	0.17149	-0.0340993	0.360583	-0.264434	0.149673	0.254013	0.314046	0.0973978	0.422061	-0.295165	0.00466568	0.0884676	-0.150024	-0.129348	0.0424101	-0.413237	-0.205292	-0.317933	-0.282718	-0.365969	0.210811	0.11908	0.197327	0.435194	0.283855	-0.00116995	0.443768	0.154322	-0.386131	0.332987	0.44128	0.0456566	0.0132595	0.277585
TCGA-DD-AACY-01	0.0602738	0.0999525	-0.0548749	0.164711	-0.154546	0.0737251	-0.375937	-0.0644056	0.0693619	0.384429	0.626093	0.252188	-0.277553	-0.025375	-0.502827	0.138894	0.192607	-0.20364	-0.25576	-0.0037814	-0.253472	-0.48123	-0.155539	-0.000366583	0.101196	0.167907	0.0858824	-0.171532	0.312006	-0.152722	0.390794	-0.140549	0.0312653	-0.0818965	0.0853232	-0.102643	0.433497	-0.209928	0.232974	0.111123	-0.111906	0.47667	0.153348	0.159469	-0.196539	0.136818	-0.125517	-0.0738182	-0.0154098
TCGA-DD-AACZ-01	0.390384	0.542278	-0.00636631	0.288888	0.0533229	-0.0335148	0.31314	0.0917407	0.117719	-0.261978	-0.37338	-0.405677	0.28058	-0.0695853	0.109015	0.389543	0.531505	0.0103949	0.218736	0.419016	0.327866	0.538995	0.243377	0.357137	-0.0819779	0.151443	-0.0332678	0.0301791	-0.410714	0.381743	-0.013377	0.534184	-0.0868756	-0.113744	-0.156177	-0.156255	-0.213874	0.0854227	-0.280737	0.212853	0.354685	-0.487112	-0.618498	0.309332	-0.538295	-0.380873	-0.164882	0.164337	0.237553
TCGA-DD-AAD0-01	0.24376	0.45831	-0.205345	0.233432	-0.231761	0.0623515	0.499756	-0.0778243	-0.298136	-0.0688138	-0.127015	0.0506	0.338018	-0.290539	-0.294305	-0.234979	-0.0362113	-0.248764	-0.348176	0.253705	0.23965	0.422246	0.074169	0.140447	-0.486795	0.359301	0.612362	-0.277739	-0.270205	-0.193465	0.115817	-0.428662	-0.358705	-0.200333	-0.379859	0.325424	0.0278587	0.19737	0.465764	0.179808	0.339653	0.584408	0.46126	0.216013	0.555678	0.232503	-0.0629145	-0.0883991	0.296047
TCGA-DD-AAD1-01	0.525358	0.132775	0.496631	0.211984	0.3733	-0.00999837	0.427716	0.262985	0.449004	0.0339143	-0.0556526	0.0697938	0.43597	0.318898	0.150065	0.399663	0.177365	0.192803	0.200708	0.206153	0.333148	0.508834	0.332729	0.355003	-0.0213358	0.0369664	0.399464	0.215624	0.233254	0.418424	-0.341753	0.611664	0.542813	0.519896	0.573266	-0.397319	-0.482898	-0.332796	-0.551239	-0.258513	-0.0396477	-0.503938	-0.414602	0.0321572	-0.547774	-0.502828	-0.572276	0.274653	0.0927335
TCGA-DD-AAD2-01	0.184676	0.550504	0.497265	0.115776	0.496955	0.145219	-0.488237	0.253861	0.476575	0.506587	0.492791	0.436883	0.100916	0.264887	0.695781	0.664581	-0.461288	0.0875214	0.158576	0.315458	-0.331179	0.010339	0.00684336	0.423705	0.477501	0.280956	-0.573117	0.250582	0.457266	0.322895	-0.0220313	0.488008	0.543612	0.538243	0.549154	0.398875	0.625315	0.0276945	0.0578221	0.159495	0.329438	0.199038	0.162264	-0.113561	0.255216	0.124517	0.140163	0.141557	-0.0603864
TCGA-DD-AAD3-01	0.392139	0.421532	0.425653	0.490336	0.326258	0.287039	0.405013	0.0690675	0.146451	0.281778	0.0990086	0.0117356	0.332273	0.128897	0.235152	0.211711	-0.0643539	0.190001	0.290624	0.117726	0.23636	0.41146	0.425902	0.417631	-0.198359	0.447226	0.591292	-0.0441226	0.23339	0.0381792	-0.1593	0.528144	0.471683	0.511984	0.508596	0.169712	0.35412	0.192791	0.344607	0.149258	0.437654	0.147134	0.283049	0.00372654	0.25609	0.137186	-0.531618	0.0857822	-0.127962
TCGA-DD-AAD5-01	-0.132673	0.200499	-0.130177	-0.0510244	0.119832	-0.374998	0.0249976	-0.0213789	0.0623968	-0.0683015	-0.300076	-0.0213751	-0.155365	0.0165288	0.110167	0.00745565	-0.103192	-0.135165	-0.37137	0.268121	0.0541575	0.108752	-0.0485594	0.22668	0.200194	-0.365147	-0.377633	0.0638152	-0.461911	0.210838	0.28779	-0.16154	0.00498981	-0.198512	-0.00475954	-0.182374	-0.387481	-0.137057	-0.312083	-0.0212666	0.00585483	-0.311476	-0.666143	-0.55678	-0.696209	-0.309984	0.226191	0.18508	0.213221
TCGA-DD-AAD6-01	-0.298254	-0.30879	-0.503411	0.0210553	-0.605015	-0.325029	-0.452019	-0.186106	-0.226905	-0.120285	-0.00748633	-0.239098	-0.522037	-0.461808	-0.509563	-0.411585	-0.101675	-0.203066	-0.0798589	-0.517204	-0.410153	-0.600526	-0.57974	-0.491306	-0.214086	-0.290095	-0.216513	0.0739606	-0.275577	-0.424155	-0.211159	-0.570085	-0.372512	-0.397699	-0.438373	-0.397886	-0.58535	-0.281101	0.432872	-0.513355	-0.504304	0.569614	-0.157343	-0.0019082	-0.0673318	0.203982	-0.325077	-0.205317	-0.12677
TCGA-DD-AAD8-01	-0.464654	-0.394184	-0.573317	-0.574661	-0.597056	-0.115458	-0.26792	-0.340039	-0.408785	-0.153927	-0.0420785	-0.148349	-0.394706	-0.308333	-0.50532	-0.547174	-0.301443	-0.0956505	-0.0181269	-0.575813	-0.0803072	-0.511579	-0.2831	-0.481379	-0.351289	-0.454188	0.329149	0.0355113	-0.458087	-0.447356	0.161998	-0.474427	-0.311494	-0.411935	-0.385471	-0.102564	-0.544956	-0.11172	0.321538	-0.0835052	-0.0445797	0.239117	0.158014	-0.636634	-0.14728	0.016072	-0.386838	-0.38997	-0.163255
TCGA-DD-AADA-01	-0.491444	-0.518614	-0.248853	-0.451444	-0.43468	-0.259172	-0.586703	-0.151439	-0.0448132	-0.0297187	0.213209	0.211466	-0.541179	-0.245601	-0.594897	-0.474967	-0.268206	-0.608802	-0.193706	-0.584246	-0.267846	-0.744843	-0.354154	-0.555405	-0.0927361	-0.294321	-0.327535	0.192204	-0.0699865	-0.32173	-0.153427	0.49696	0.0536393	-0.11641	0.0955922	-0.33741	-0.68962	-0.547125	-0.395188	-0.432857	-0.313922	-0.166189	-0.137571	-0.583416	-0.423764	-0.406067	-0.44517	-0.391587	-0.552854
TCGA-DD-AADB-01	0.383004	-0.0491046	-0.00366954	-0.0807287	0.302041	-0.00185145	0.0244278	0.161747	0.156935	-0.347634	-0.351469	-0.0392761	0.191504	-0.0422592	0.00988712	0.100994	0.544663	-0.089192	0.421151	0.320567	0.394234	0.442528	0.0230489	0.135951	-0.282088	-0.329431	-0.107018	0.149168	-0.146786	0.403913	0.159296	0.635093	-0.276951	-0.148957	-0.307084	-0.0970655	-0.357824	0.173388	-0.536208	0.00629605	0.0642427	-0.571463	-0.482736	0.564103	-0.615178	-0.527756	-0.152995	0.173386	0.312747
TCGA-DD-AADC-01	0.0695303	-0.0891063	-0.151559	0.142619	0.144594	-0.326208	0.198625	-0.0218051	-0.0993396	-0.261623	-0.341492	-0.0752607	0.122483	0.0531433	0.162595	-0.0579017	0.214732	-0.0271116	0.0990498	0.144208	0.374755	0.160464	-0.0173968	-0.10985	0.0869722	-0.450464	-0.144313	-4.8e-05	-0.245656	-0.14771	0.00610044	-0.216513	0.108525	0.273737	0.168725	-0.361994	-0.515917	-0.117232	-0.476568	-0.366806	-0.0496334	-0.497325	-0.543194	0.418705	-0.600241	-0.377446	0.0169599	0.280281	0.243205
TCGA-DD-AADD-01	0.226552	0.398915	-0.118607	0.441527	0.0681351	0.0421558	0.544985	0.167469	-0.003646	-0.311885	-0.0699056	-0.0194813	0.198701	-0.228551	0.168716	0.25076	0.319267	-0.300856	0.179492	0.489752	0.487745	0.623482	0.226274	0.312384	-0.275324	0.121247	0.261659	-0.0650165	-0.0540134	-0.0183162	0.115027	-0.1295	-0.394427	-0.209225	-0.469101	0.00972133	0.247183	0.0896525	-0.231307	-0.131109	-0.0933325	0.0272184	0.3743	0.6489	-0.349701	-0.194876	-0.137087	0.0357233	0.345824
TCGA-DD-AADF-01	-0.303239	-0.762709	-0.578333	-0.60935	-0.558391	-0.294146	-0.501821	-0.41314	-0.498233	-0.124015	-0.18859	-0.18181	-0.555365	-0.541919	-0.521748	-0.349189	-0.316852	-0.249227	-0.404146	-0.465125	-0.32703	-0.447567	-0.287856	-0.358374	0.236291	-0.410415	-0.239175	-0.283985	-0.0460678	-0.519129	0.3294	0.334171	-0.452877	-0.514377	-0.44126	-0.0552295	0.00305317	0.0602159	-0.323228	-0.0377565	-0.267293	-0.324092	0.0298809	0.301388	0.363675	0.00525519	0.502665	-0.171712	-0.0253961
TCGA-DD-AADG-01	0.298753	0.337058	-0.105687	0.385546	0.111569	0.00164346	0.221753	-0.287157	-0.399425	-0.280385	-0.0805968	-0.35471	-0.0371464	-0.177966	-0.350554	-0.101123	-0.136042	0.0734846	0.247026	0.242567	0.0750247	-0.095779	-0.0718992	-0.0487544	-0.00627839	0.462056	0.559873	-0.192184	-0.0677189	-0.385052	-0.290578	-0.521584	-0.265088	-0.137133	-0.297892	0.156633	0.354131	0.178987	0.111981	-0.136019	0.199163	0.250588	0.579383	0.236793	0.614324	0.27419	0.404125	-0.0375234	0.0517812
TCGA-DD-AADI-01	0.144149	-0.0710083	0.0199965	0.0541381	-0.350727	-0.161303	0.330785	-0.000798743	-0.0487573	0.0613174	-0.0698744	-0.158474	-0.0594486	0.192513	0.0687218	0.0400191	0.565708	-0.187772	-0.074214	-0.000800673	-0.0407878	0.257552	0.188822	0.146759	0.377407	-0.212993	-0.316053	-0.0707704	0.0243716	0.204117	0.0666735	0.543059	0.249738	0.11693	0.237293	-0.230008	-0.451891	-0.35105	-0.684523	-0.120813	-0.145982	-0.649229	-0.339257	-0.675991	-0.663801	-0.600449	0.356994	0.219479	0.126768
TCGA-DD-AADJ-01	-0.335284	-0.249064	-0.263082	0.0516383	-0.220902	0.136826	-0.108906	-0.159846	-0.319	0.0185227	-0.0376402	-0.130964	-0.0245644	0.339942	-0.0888338	0.0290599	0.30773	-0.0909222	-0.308515	-0.327531	-0.291833	-0.473176	-0.21698	-0.226888	0.242547	0.241482	-0.310515	-0.246037	0.405314	-0.251979	-0.168915	-0.227825	-0.425394	-0.37692	-0.398944	0.192361	0.240838	0.113089	0.0302063	-0.141502	-0.0445253	0.286191	0.410238	0.215695	0.274577	0.228402	0.541719	-0.104951	-0.0199944
TCGA-DD-AADK-01	-0.100098	-0.195967	0.0740712	-0.395778	0.0145213	-0.157252	-0.308391	0.0329465	0.195622	0.343202	0.418862	0.173472	-0.105931	0.369443	0.0353346	-0.137363	-0.381686	-0.00683011	-0.404623	-0.223475	-0.61514	-0.657419	-0.315577	-0.295622	0.27358	-0.387141	-0.671729	0.421564	0.140015	-0.0942785	0.21172	0.516535	0.462448	0.248338	0.491558	-0.231147	-0.488045	-0.253805	-0.216432	-0.321102	-0.162942	-0.27638	-0.326888	0.271783	-0.188892	-0.0701267	-0.116715	-0.128071	-0.279218
TCGA-DD-AADL-01	0.354383	0.334315	-0.193322	0.254109	-0.13395	0.0617397	0.302328	0.0484668	-0.135276	-0.283663	-0.192787	-0.151249	0.00552382	-0.0362027	-0.0286248	-0.176977	0.292294	0.0344798	0.445153	0.32259	0.100418	0.305019	0.174393	0.167338	-0.334129	-0.0338555	0.0214027	-0.195666	-0.113251	-0.0100919	-0.392399	-0.601329	-0.29865	-0.278841	-0.366478	-0.0670519	0.233592	-0.0322673	-0.0293705	-0.000729629	-0.156553	-0.0479687	-0.05289	0.310317	0.33088	0.128477	-0.0454166	-0.0767595	0.0654524
TCGA-DD-AADM-01	-0.186063	-0.597062	-0.210091	-0.419037	-0.393927	-0.0600437	-0.302904	-0.141376	-0.0735678	0.40061	0.348186	0.162207	-0.54837	-0.152507	-0.375956	-0.164477	-0.148656	0.121624	-0.0632695	0.181545	-0.354701	-0.283424	-0.0482814	-0.25799	0.285646	0.270063	-0.696005	-0.361404	0.0584222	-0.229154	-0.117301	0.00146162	-0.234904	-0.474558	-0.284412	0.305123	0.0880933	0.136714	0.336574	0.0294066	-0.479662	0.469816	0.393546	-0.0121974	0.408334	0.549006	0.473057	-0.00193977	0.200011
TCGA-DD-AADN-01	-0.257347	-0.409266	-0.205823	-0.342147	-0.176142	-0.33036	-0.56627	-0.199065	-0.283121	-0.110354	-0.436047	-0.381907	-0.486889	0.0471608	-0.162204	0.50286	-0.282789	-0.366896	-0.507338	0.0644389	-0.58527	0.0693312	-0.311953	-0.169182	0.111489	-0.329385	-0.804404	-0.117238	-0.342291	-0.0630524	0.329283	0.513168	-0.382256	-0.507544	-0.410619	-0.303216	-0.55378	-0.15562	-0.0617971	-0.0060347	-0.353562	-0.204429	-0.612894	0.439876	-0.409004	-0.218269	0.189045	-0.142901	0.0613066
TCGA-DD-AADO-01	-0.22343	-0.485737	-0.552943	-0.132695	-0.377212	-0.174977	-0.105299	-0.0102807	0.004597	0.137348	0.0583231	0.173719	-0.456947	0.0509409	-0.110403	-0.177828	0.170195	-0.153031	-0.158506	-0.207339	-0.507509	-0.0519657	-0.250598	-0.166324	0.213518	0.21236	-0.763719	-0.321965	-0.261	-0.0951624	0.171057	0.517738	-0.364387	-0.498434	-0.397155	-0.367047	-0.566542	-0.21684	-0.425262	-0.0838067	-0.125618	-0.558534	-0.419947	0.654201	-0.482551	-0.319709	0.237525	-0.100859	-0.067273
TCGA-DD-AADP-01	0.250518	-0.380476	-0.143601	-0.123444	0.307501	-0.103617	0.274201	-0.0129959	0.0119194	0.210395	0.364618	0.207384	-0.00764459	-0.0321772	-0.251067	-0.300582	0.12361	0.168254	0.272436	0.236716	0.222422	0.282273	0.148217	-0.14845	-0.0774645	-0.39075	0.497094	0.0280675	0.322381	-0.0902189	-0.243419	0.0129703	0.336566	0.366127	0.315594	-0.0397575	0.0937591	0.0230342	-0.450178	-0.0547524	-0.0668062	-0.403396	-0.0479435	0.525118	0.24498	-0.21536	-0.301869	0.137322	0.118473
TCGA-DD-AADQ-01	-0.0211462	-0.621424	-0.37126	-0.378813	-0.51417	-0.329198	-0.489211	-0.161917	-0.0506648	-0.121646	0.00662618	0.00541336	-0.432305	-0.145415	-0.392097	-0.130674	-0.531192	-0.0476318	-0.313913	0.287479	-0.0884282	-0.301276	-0.304301	-0.419087	-0.152055	-0.372416	-0.664816	-0.248615	-0.442237	-0.363317	0.0804533	-0.253544	-0.512114	-0.466654	-0.51635	-0.117907	-0.143141	-0.109042	-0.346897	-0.208058	-0.102294	-0.133627	-0.000935319	-0.594692	0.245747	-0.074401	0.20612	-0.289554	-0.300854
TCGA-DD-AADR-01	-0.175847	-0.537028	-0.150652	-0.405746	-0.0671756	0.0637748	-0.157786	-0.122534	0.0912627	0.0563281	-0.136615	-0.195301	-0.252001	-0.0658124	-0.0888731	-0.356853	0.0548282	0.0921946	0.110509	-0.0861196	-0.0278655	-0.161238	-0.522057	-0.456827	0.203271	-0.139949	-0.655217	-0.250603	0.322257	-0.248804	0.0526662	0.230759	-0.315882	-0.350922	-0.318215	0.119888	-0.0614914	0.250944	0.28914	-0.203991	-0.00434059	0.554755	0.266068	-0.0134642	0.394174	0.352754	0.451487	0.00663775	0.0146906
TCGA-DD-AADS-01	-0.665056	-0.651053	-0.433817	-0.267274	-0.300671	-0.24803	-0.539935	-0.24098	-0.422181	0.139473	0.130697	-0.155025	-0.518566	-0.195198	-0.354501	-0.0850382	-0.288255	-0.179016	-0.312005	-0.664261	-0.635993	-0.774069	-0.458682	-0.397697	0.170549	-0.422883	-0.607476	-0.113817	-0.27626	-0.364303	0.20958	0.410065	-0.449061	-0.554575	-0.454468	-0.109097	-0.347764	-0.363475	-0.211522	-0.296528	-0.36977	-0.215757	0.124225	-0.260907	0.486226	0.204875	0.467165	-0.353529	-0.352972
TCGA-DD-AADU-01	-0.572263	-0.256883	-0.316078	0.0262144	-0.176506	-0.170652	-0.400689	-0.370958	-0.529823	-0.0833966	0.0370486	-0.465007	-0.527307	-0.0874332	-0.171301	0.1331	-0.64335	-0.422624	-0.401334	-0.645345	-0.559219	-0.762404	-0.474157	-0.331023	0.144325	0.214192	-0.12143	-0.197562	0.363315	-0.52655	-0.28823	-0.620906	-0.24781	-0.213384	-0.24058	-0.320863	-0.584885	-0.606023	0.554714	-0.536656	-0.389298	0.646777	0.259357	-0.0794952	0.573672	0.495168	0.127755	-0.418098	-0.462327
TCGA-DD-AADV-01	0.119186	0.0762042	-0.0147179	0.00786094	-0.247394	-0.0125521	0.260226	-0.19326	-0.184869	0.0517386	-0.131492	-0.395297	-0.118486	-0.336306	-0.0873245	-0.165125	-0.30203	-0.336435	0.234489	0.0988137	0.369707	0.575576	0.203407	0.0554976	-0.287819	0.117525	0.348131	0.0825763	0.103872	0.0355124	0.337919	-0.29783	-0.025674	0.080258	-0.0193809	0.0629232	0.275666	0.338623	0.285068	0.0270756	-0.0602632	0.0945992	0.24138	-0.502732	0.369496	0.0379712	-0.314664	-0.0134869	-0.022702
TCGA-DD-AADW-01	0.334499	0.272053	0.0799342	0.277102	0.331243	-0.0109243	0.327225	0.0188519	-0.0378042	-0.475423	-0.410543	-0.183833	0.300037	0.127832	0.201508	-0.120558	0.409903	-0.0202049	-0.0543402	-0.0206232	0.281273	0.470822	-0.0418702	0.242098	-0.23741	-0.192108	0.574691	0.186012	0.210655	0.323828	-0.386558	-0.255752	0.244513	0.391359	0.257214	-0.371465	-0.232276	-0.239003	-0.61596	-0.233642	0.113709	-0.644079	-0.604199	0.43933	-0.749251	-0.596752	-0.375449	0.232051	0.218932
TCGA-DD-AADY-01	0.58887	0.299616	0.0816646	0.212355	0.00655896	0.0886772	0.494842	0.103299	-0.0811759	-0.145222	-0.241939	-0.0127014	0.427609	0.164294	0.0841178	0.00699639	0.592742	-0.153516	0.0526549	0.484083	0.300302	0.468095	0.295748	0.363751	-0.321402	0.207457	0.505862	-0.293327	0.120626	0.214118	-0.1383	-0.449345	0.15578	0.370239	0.197085	-0.164136	0.148701	-0.20987	-0.0946561	-0.00834682	0.0500082	-0.0468915	-0.0502058	-0.264313	-0.103829	-0.168514	-0.114054	0.254412	0.320384
TCGA-DD-AAE0-01	0.289729	-0.163245	0.220595	-0.0243996	0.405244	-0.309573	0.254997	0.11876	0.0851424	-0.173362	-0.47625	-0.224814	0.020789	0.157798	0.35714	-0.277695	0.00113748	-0.330882	-0.328884	0.18481	0.228632	0.344148	0.236818	0.168874	0.443684	-0.474195	-0.379051	0.202175	-0.00569259	0.316948	-0.267531	-0.0326985	0.366124	0.326091	0.340229	-0.438353	-0.626707	-0.361681	-0.731534	-0.177838	-0.398199	-0.799607	-0.70968	-0.290017	-0.878065	-0.59637	0.242884	0.201881	0.223618
TCGA-DD-AAE1-01	-0.333103	-0.211614	-0.333718	-0.216503	-0.571986	-0.218339	-0.0282762	-0.0981055	-0.288006	-0.136014	0.178418	0.0754158	-0.324931	-0.31068	-0.337681	-0.290915	0.481349	-0.359841	-0.0999617	-0.570446	-0.0567012	-0.215985	-0.468444	-0.281021	-0.294917	0.484301	-0.44765	0.0690561	-0.123374	-0.309091	-0.324765	-0.208521	-0.400728	-0.254012	-0.437633	-0.458542	-0.688638	-0.308809	-0.431955	-0.399293	-0.478639	-0.427435	-0.221789	0.561902	-0.35253	-0.204332	-0.359089	-0.186658	-0.228419
TCGA-DD-AAE2-01	0.0509452	-0.297384	0.1859	-0.319078	0.032493	0.258667	-0.119395	0.00144373	-0.218594	0.147391	0.190843	0.232163	0.00389445	-0.181792	-0.409739	-0.485754	-0.121238	0.0623568	0.402998	-0.391657	0.157664	-0.0880401	-0.0233393	-0.177429	-0.166362	0.418421	0.282378	-0.074758	0.104643	-0.0532603	0.231217	0.488261	-0.117496	-0.0295664	-0.0951352	0.343688	-0.191565	0.10683	0.542426	0.301597	0.166553	0.604005	0.514858	-0.205394	0.4002	0.322061	-0.359779	-0.0347355	-0.0749553
TCGA-DD-AAE3-01	-0.499875	-0.394234	-0.263398	-0.0147886	-0.444466	-0.189121	-0.324824	-0.240984	-0.189719	0.165258	0.263466	-0.0298897	-0.311725	-0.542132	-0.119487	-0.399429	-0.583073	0.0740596	-0.47472	-0.451876	-0.421737	-0.656286	-0.356768	-0.225846	0.318141	0.129378	-0.431044	-0.293158	0.368598	-0.498456	-0.320548	-0.622882	-0.304727	-0.339167	-0.236769	0.0910613	-0.0952323	-0.154867	0.383516	-0.312026	-0.0362046	0.1244	0.36054	-0.14285	0.774384	0.361055	0.547939	-0.175491	-0.347639
TCGA-DD-AAE4-01	-0.503355	-0.489328	-0.137172	-0.225011	-0.581246	-0.00680108	-0.489414	-0.401303	-0.326936	0.280759	0.225131	-0.100661	-0.614613	-0.155953	-0.109298	-0.323649	-0.410059	0.0116969	0.134302	-0.546372	-0.471932	-0.265402	-0.28296	-0.32561	0.340999	-0.0929307	-0.500869	-0.300849	-0.0935114	-0.287723	0.312682	0.596938	-0.280681	-0.313265	-0.221767	0.141621	-0.00858212	-0.0477486	0.0465747	-0.0103757	-0.257949	0.0617783	0.685662	-0.217003	0.518478	0.198467	0.421521	-0.111407	-0.119809
TCGA-DD-AAE6-01	-0.0611282	0.300675	-0.227454	0.247322	0.122849	0.0167324	0.032649	0.0860857	-0.32658	-0.21585	-0.207876	-0.115421	-0.216421	-0.189575	-0.1457	-0.211618	0.134682	-0.0372646	0.283207	-0.114514	-0.210165	-0.337412	0.0542131	-0.0451812	0.0811535	-0.195753	0.103905	-0.0442118	0.169653	-0.247549	-0.283522	-0.485203	-0.470733	-0.476581	-0.485252	-0.0433414	0.182468	0.121734	-0.125624	-0.029197	-0.307279	-0.143054	-0.0513261	0.199376	-0.291006	-0.345441	0.321257	-0.110611	0.110526
TCGA-DD-AAE7-01	-0.566499	-0.568658	0.183439	-0.295681	0.0468607	0.0920547	-0.526479	-0.129236	0.105267	0.325238	0.523643	0.227528	-0.363687	-0.0191468	-0.252684	-0.230203	-0.239791	0.368771	0.277571	-0.463057	-0.570269	-0.549424	-0.551989	-0.511706	-0.0925297	0.340783	-0.0730642	0.322948	0.237711	-0.476987	0.00647796	0.373022	0.0710867	0.00299939	0.181371	0.106838	-0.195739	-0.33243	0.328419	-0.191669	0.0122032	0.466137	0.6547	-0.506187	0.135979	0.259083	-0.522743	-0.274153	-0.36262
TCGA-DD-AAE9-01	0.196601	0.354303	-0.117116	0.48115	-0.0402936	0.160121	0.438637	0.0306947	-0.332518	-0.0695025	0.0940429	-0.300628	0.127789	0.048812	0.256727	0.278509	0.0293097	-0.115649	-0.157362	-0.0648235	-0.172509	-0.335094	-0.225422	0.163769	0.0850698	0.389508	-0.629089	-0.0839778	0.113348	-0.153449	0.0868181	-0.478477	-0.228903	-0.145894	-0.175644	-0.0495381	0.0770971	-0.0553923	0.547347	-0.0595487	0.0943211	0.481714	0.394858	0.129272	0.504723	0.482227	0.492697	-0.159569	-0.0836624
TCGA-DD-AAEA-01	-0.53299	-0.05507	-0.384895	0.0607634	-0.274266	-0.0263867	-0.140702	-0.0643785	-0.160181	0.0255991	0.330695	0.0764698	-0.110811	-0.222697	-0.12176	-0.264938	-0.0642202	-0.323779	0.0598097	-0.580649	-0.149968	-0.524149	-0.109922	-0.0474369	-0.241609	-0.232011	0.173379	0.155155	-0.142809	-0.445175	-0.181512	0.439353	-0.463591	-0.494539	-0.488068	-0.169103	-0.483331	-0.273652	-0.172832	-0.117499	0.00245323	-0.361117	-0.410383	0.627366	0.452778	0.0694694	0.123705	-0.336937	-0.187006
TCGA-DD-AAEB-01	-0.705584	-0.599887	-0.499149	-0.428189	-0.499034	-0.294848	-0.680701	-0.359778	-0.37084	-0.0206232	0.36642	0.0207343	-0.537183	-0.181883	-0.553675	-0.452015	-0.404559	-0.195416	-0.319021	-0.755782	-0.626563	-0.699133	-0.693043	-0.638632	0.138545	0.103365	-0.68538	-0.129662	-0.129762	-0.652803	-0.406688	-0.538045	-0.426749	-0.366342	-0.412935	-0.153842	-0.552342	-0.697099	-0.118555	-0.649019	-0.473885	0.234937	0.375509	-0.223016	0.637369	0.372217	0.11807	-0.497877	-0.582207
TCGA-DD-AAED-01	-0.58252	-0.513407	-0.432351	-0.51917	-0.555159	-0.280045	-0.281908	-0.15868	-0.194088	-0.134897	0.143638	-0.198402	-0.472671	0.153618	-0.387663	-0.71677	-0.357347	-0.492832	-0.00808575	-0.361357	-0.260728	-0.0734262	-0.233525	-0.513933	-0.206173	-0.483461	-0.216543	0.110454	-0.541953	-0.302816	-0.349121	-0.435672	-0.294913	-0.301712	-0.371754	-0.440539	-0.744935	-0.566532	-0.425841	-0.438373	-0.512995	-0.299523	-0.491706	0.0182692	-0.670451	-0.378053	-0.207804	-0.400657	-0.403893
TCGA-DD-AAEE-01	-0.131361	0.316841	-0.269025	-0.282972	-0.219804	-0.0539219	-0.342584	-0.202008	-0.0718814	-0.0557561	0.168524	0.164562	-0.104103	-0.397161	-0.23202	0.275339	-0.367181	-0.0865247	-0.119153	0.0524948	0.0601554	-0.107761	-0.0264848	-0.141977	-0.0337793	-0.348394	-0.438807	-0.269024	0.326415	-0.0614907	0.0293334	-0.578899	-0.433359	-0.309145	-0.424593	0.126121	0.156491	-0.0785916	0.117133	-0.42363	-0.129643	0.3731	0.415993	0.170647	0.524419	0.260834	0.404376	-0.125221	0.0319543
TCGA-DD-AAEG-01	0.215617	0.388036	0.204104	0.288741	0.0438392	-0.0233849	-0.19237	0.020046	0.280809	0.189854	0.26847	0.317509	-0.113641	-0.066908	0.23321	0.141467	-0.149345	0.149665	0.162952	0.478991	-0.25556	-0.387861	0.176907	-0.0763777	0.464091	0.394077	-0.462044	0.115533	0.26248	0.0235084	0.037463	-0.473214	0.309565	0.212406	0.385614	0.456365	0.722057	0.0992622	-0.0637015	0.162943	0.0589405	0.0508569	0.375627	0.361418	-0.210409	0.211155	0.542927	0.209971	0.162539
TCGA-DD-AAEH-01	-0.37951	-0.378464	-0.0895341	-0.313322	-0.178569	0.154006	-0.145021	0.0230684	0.214901	0.436258	0.554378	0.138601	-0.02666	-0.137346	-0.207701	-0.110486	-0.455584	-0.0607747	0.224917	-0.475268	-0.0520504	-0.529843	-0.360832	-0.277351	0.0416364	0.544642	-0.490016	-0.250044	0.383374	-0.3698	0.233694	0.665665	-0.101856	-0.203424	-0.0809958	0.115185	0.203163	-0.309436	0.526225	-0.222673	-0.287357	0.626144	0.492437	-0.196161	0.605619	0.528808	0.230773	-0.0935175	-0.208831
TCGA-DD-AAEI-01	-0.22733	-0.118739	-0.269718	-0.144297	-0.401408	0.238968	-0.581921	-0.102713	-0.172366	0.317311	0.338027	0.0503531	-0.0857456	-0.281882	-0.065034	-0.223572	-0.327938	-0.160818	-0.171359	-0.468891	-0.443867	-0.285897	-0.480769	0.0329756	-0.125322	-0.0823318	-0.577978	-0.150773	0.0311102	0.0161702	0.178457	-0.227839	-0.280862	-0.256808	-0.28265	0.425435	0.186592	0.556329	0.71905	0.185555	0.271756	0.690385	0.490123	0.721586	0.57545	0.584455	-0.0445136	-0.0692664	0.152015
TCGA-DD-AAEK-01	-0.0479055	0.346335	0.409256	0.489603	0.205168	0.351735	0.319027	0.304175	0.200967	0.335743	0.188703	0.248584	0.366547	0.186785	0.328814	0.444081	-0.214156	0.25323	0.133593	-0.0568886	-0.153936	0.513629	-0.0941571	0.241357	-0.0960525	0.568579	0.462792	0.23799	0.315679	0.329839	-0.00857742	0.708262	0.434385	0.449979	0.461155	0.378908	0.282596	-0.0993109	0.383037	0.1358	0.39056	0.429986	0.652801	0.56648	0.628091	0.287321	-0.480446	0.129508	-0.0443423
TCGA-DD-AAVP-01	-0.0653795	0.425108	-0.124103	0.288207	-0.22771	0.326845	-0.0507085	0.176771	-0.0791439	0.1273	0.152541	0.164579	0.0544438	0.143015	0.338522	-0.0320242	0.267086	-0.154429	-0.0719737	0.335406	0.0375157	-0.118145	0.025795	0.121024	0.505761	0.56483	0.161464	-0.28241	0.167563	-0.254372	0.174908	-0.244985	0.12837	0.12462	0.0820281	0.248845	0.333042	0.0833265	0.150392	0.296789	0.452328	0.113989	0.54709	0.194526	0.491505	0.204488	0.608498	0.0602229	0.119653
TCGA-DD-AAVQ-01	-0.145903	-0.203143	0.163348	-0.143385	0.0637882	-0.164797	-0.172443	0.10343	0.203185	0.0936148	0.106727	0.280185	0.187476	0.113014	0.0664067	-0.22579	0.0609193	-0.356154	-0.390596	-0.481922	0.0825681	0.037952	0.0950132	0.0652177	0.158197	-0.176804	0.127328	0.272821	-0.0568528	0.376154	0.0423593	0.770539	0.324884	0.250254	0.370182	-0.25589	-0.625558	-0.334317	-0.667607	-0.110103	-0.230792	-0.647371	-0.284801	-0.0121132	-0.572172	-0.518474	-0.316244	0.0637698	0.00404758
TCGA-DD-AAVR-01	-0.259778	-0.319236	0.191576	-0.137023	-0.273927	0.115899	-0.524723	0.0326685	0.0760679	0.389186	0.457353	0.182495	-0.199797	-0.168629	-0.234594	-0.108291	-0.470091	0.0490994	0.285549	-0.18813	-0.189149	-0.503601	-0.0263155	-0.201567	0.536073	0.265844	-0.551332	-0.0150605	0.51369	0.368914	0.516729	0.633119	0.277046	0.182925	0.319638	0.16719	0.384815	-0.0257785	0.439052	-0.172391	0.0177523	0.524696	0.452269	-0.573219	-0.197823	0.20663	0.492064	0.00313021	-0.143929
TCGA-DD-AAVS-01	0.291456	0.169222	0.138783	0.044765	-0.0472732	0.135589	0.392563	0.179126	0.284926	0.0095936	-0.0367824	0.092384	0.250581	0.0799114	0.215649	-0.312121	0.47435	-0.327636	0.201839	0.196109	0.289522	0.545929	0.342729	0.110595	0.076131	-0.0319117	0.34228	0.0289577	0.367181	0.347712	-0.257785	0.0422126	0.322172	0.371956	0.232374	-0.122423	0.0456692	-0.129497	-0.0523649	-0.0523271	-0.176425	0.0680048	0.0147918	-0.24695	-0.00663691	-0.11319	-0.0209661	0.109504	0.121521
TCGA-DD-AAVU-01	-0.053079	0.236238	-0.54828	-0.15736	-0.286518	-0.049497	0.0880396	-0.0844242	-0.212012	0.0327428	-0.0804352	-0.276565	-0.182693	-0.0367811	0.123678	-0.129762	0.130684	0.216394	0.173254	0.287666	-0.155197	0.368254	0.0422021	0.0562215	-0.0130563	-0.47429	-0.56399	-0.336232	-0.0586431	-0.13011	-0.0904331	-0.517008	-0.482145	-0.410544	-0.490779	0.174058	0.326441	0.376201	-0.0789032	-0.0204561	-0.0315888	-0.0226953	0.270887	-0.0771455	0.228498	0.181877	0.401039	0.0302028	0.174211
TCGA-DD-AAVV-01	0.489163	0.00968469	0.431484	-0.0067665	0.410204	0.0294521	-0.109829	0.334482	0.205656	0.032863	-0.016371	0.0403737	-0.0181175	0.358164	0.462663	0.415917	0.183074	0.298023	0.0314481	0.0942908	0.159715	-0.243404	0.413003	0.257502	0.426696	0.00693312	0.0138314	0.0255988	0.0262086	0.415321	0.105142	0.605263	0.464982	0.4245	0.475446	-0.166267	-0.174084	0.0511883	-0.0353036	0.0220955	0.150972	0.10775	-0.411628	-0.429382	-0.630808	-0.171636	0.241048	0.127224	0.145759
TCGA-DD-AAVW-01	-0.0793352	-0.0481391	0.426043	0.19904	0.236416	0.23781	-0.0937427	0.225612	0.377871	0.341036	0.381793	0.36	0.394347	0.250371	0.334174	0.214738	0.0173622	-0.23171	0.0384136	-0.417642	-0.0462487	0.384637	-0.017261	0.205703	0.0998212	0.0491901	0.359395	0.247878	0.24598	0.288366	-0.0332116	0.446995	0.517579	0.555598	0.542758	-0.274704	-0.0695327	-0.265402	0.232885	0.0467372	-0.114252	0.270974	-0.00289086	0.301298	0.214758	0.183614	-0.34831	-0.0332472	-0.372807
TCGA-DD-AAVX-01	-0.427699	-0.383141	0.229628	-0.294589	0.373427	-0.173262	-0.433154	-0.0545479	0.199122	0.0330908	0.277459	0.153877	-0.0196413	0.0628733	0.00645173	-0.0747457	-0.264141	0.424137	-0.0158568	-0.0522436	-0.167059	-0.500476	-0.26468	-0.359294	-0.19306	-0.188413	-0.4079	0.202181	-0.00494798	-0.343943	0.1088	0.525371	-0.428247	-0.127583	-0.353513	0.120401	0.103584	0.25167	-0.00165512	-0.15221	-0.0309252	0.0391319	0.244609	-0.372831	0.59564	0.182858	0.0653679	-0.02451	-0.173798
TCGA-DD-AAVY-01	0.231414	0.218534	-0.289626	0.449306	-0.141401	-0.0221164	0.274894	-0.159803	-0.0890402	-0.161579	-0.0309773	-0.235509	0.205176	-0.396503	-0.141241	0.273713	-0.362787	0.108754	-0.213411	0.623697	0.207461	0.325681	0.0227458	0.0439763	-0.329195	-0.0784928	0.209053	-0.218756	-0.144012	-0.204284	-0.150281	-0.527029	-0.251721	-0.116072	-0.244948	0.0112541	0.59046	0.00525521	0.424141	-0.163391	-0.0549533	0.532126	0.445947	0.686661	0.729695	0.531042	-0.103622	-0.0350525	0.184959
TCGA-DD-AAVZ-01	0.113968	-0.0817121	-0.184128	0.098514	-0.419533	0.209088	0.0646856	0.140564	0.356913	0.195537	0.385871	0.19482	0.247524	-0.0404978	-0.326272	-0.413912	0.455287	-0.215927	0.112104	0.133811	0.243269	0.36625	0.184847	-0.0372074	-0.0960153	0.163018	0.321813	0.0824851	0.100182	0.240545	-0.165215	-0.154218	0.138344	0.334745	0.191398	-0.10623	0.0876757	-0.422441	-0.128057	-0.224839	-0.376413	0.0141801	0.392104	0.37377	0.170245	0.105348	-0.218836	0.0879964	-0.00518501
TCGA-DD-AAW0-01	0.147191	0.174463	0.37578	0.368408	0.012121	0.12424	0.120003	0.129277	0.169871	0.352939	0.287491	0.00253744	0.4804	0.228512	0.24303	0.00889112	0.226838	-0.0746963	0.00637349	0.360388	-0.0157191	0.266645	0.384384	0.335513	0.119215	0.142849	0.42003	0.00742888	0.272252	0.168375	-0.10336	0.438046	0.478516	0.490216	0.463247	0.317371	0.466123	0.0300909	0.130626	0.301054	0.33391	0.185762	0.336271	0.260699	0.412052	0.144493	-0.244931	0.0909794	-0.216498
TCGA-DD-AAW1-01	-0.274812	-0.233223	-0.205374	0.0782778	-0.575713	0.0011051	-0.355495	-0.246806	-0.219411	-0.0827214	0.286805	0.111314	0.0336103	-0.365285	-0.223715	-0.225208	-0.459542	0.0095326	-0.442286	-0.517708	0.00776688	-0.317294	-0.374098	-0.209239	-0.291651	0.475708	0.252173	-0.0619422	0.0679347	-0.30012	-0.150035	-0.519618	-0.142885	0.00299353	-0.168597	-0.123726	-0.0667917	-0.159864	0.33418	-0.342965	-0.125499	0.50028	0.462146	0.179201	0.668107	0.43414	-0.286279	-0.344535	-0.353812
TCGA-DD-AAW2-01	-0.0354638	-0.110387	-0.11204	0.126052	-0.0723908	-0.12017	0.39634	-0.294587	-0.37585	-0.193216	0.0792781	-0.485187	-0.146756	-0.440738	-0.0938451	0.103581	-0.605565	-0.0831697	-0.0550405	0.361787	0.2172	0.300972	0.0286949	-0.248901	-0.180132	0.196648	-0.17654	-0.195	0.205836	-0.361089	0.0772909	-0.578429	-0.305071	-0.0648245	-0.303479	-0.00693756	0.436151	-0.0926205	0.523339	-0.377865	-0.31395	0.566489	0.417794	0.307586	0.700865	0.391486	-0.149107	-0.10761	-0.0447377
TCGA-DD-AAW3-01	0.124716	-0.0439337	-0.442127	0.336578	-0.0200159	-0.0531025	0.100647	0.0167954	-0.138899	-0.0961912	0.236116	-0.131503	-0.21026	-0.276476	-0.399675	-0.308512	-0.46269	0.219285	-0.113061	0.367477	0.327562	0.127802	0.189266	-0.173804	-0.180484	0.321926	0.223187	-0.33634	-0.115113	-0.149592	-0.276658	-0.549822	-0.315379	-0.272094	-0.377657	-0.111537	0.439826	-0.363908	0.354351	-0.398798	-0.412806	0.539222	0.50145	0.245026	0.489247	0.380726	0.0545574	-0.0154202	0.182317
TCGA-ED-A459-01	0.244092	0.114476	0.218247	-0.0379905	0.315825	-0.00448422	-0.126683	0.043982	0.108401	0.0848799	0.244123	0.234747	0.242242	0.392385	0.408524	0.175373	-0.197085	0.211359	-0.0106516	0.332232	0.068653	0.20135	0.327079	0.12288	-0.0636086	-0.286102	-0.0837985	0.133101	-0.17367	0.388386	0.234799	-0.227464	0.132893	0.237282	0.206716	-0.0511629	0.249388	0.496824	-0.375239	0.366846	0.198283	-0.534889	-0.568226	-0.153113	-0.210176	-0.168784	-0.160277	-0.0201601	0.0661072
TCGA-ED-A4XI-01	-0.351418	0.114611	0.49605	0.330353	0.0792868	0.298147	-0.412245	0.295889	0.409294	0.477191	0.582387	0.439022	0.22265	-0.051097	-0.0147611	0.0490318	-0.434955	0.0734575	0.0989427	-0.501935	-0.269825	-0.329635	-0.399814	0.0252078	-0.107644	-0.00325012	-0.40723	0.253086	0.425243	-0.0601058	0.0600328	0.303264	0.409771	0.408231	0.454349	0.34251	0.351017	0.0468127	0.48729	-0.0185253	0.258163	0.615898	0.687594	-0.295429	0.448475	0.414553	-0.506887	-0.153664	-0.392133
TCGA-ED-A5KG-01	0.217525	0.338886	0.259294	0.221298	0.0759105	-0.334562	0.4414	-0.0461665	0.0938082	-0.319099	-0.496118	-0.279946	0.251315	-0.146959	0.166162	0.400646	0.0715474	-0.246133	-0.370914	0.302409	0.54164	0.610904	0.490846	0.320896	-0.212346	-0.330816	-0.0180962	0.0311051	-0.427778	0.325985	0.154701	0.782403	0.420212	0.356383	0.394377	-0.479173	-0.596451	-0.417941	-0.752807	-0.245101	-0.168699	-0.891293	-0.752676	-0.539812	-0.765993	-0.795683	-0.584455	0.21592	0.201042
TCGA-ED-A627-01	-0.246395	-0.014203	0.58087	0.494145	0.469714	0.166711	-0.248832	0.224836	0.165237	0.258859	0.0368929	-0.114956	0.294933	0.404841	0.397157	0.19644	-0.103164	0.358999	0.0854402	-0.084441	0.120917	0.0961467	0.386784	0.256713	-0.0691143	-0.0503038	0.568014	0.051225	0.283052	0.458919	-0.0360415	0.651701	0.499472	0.514091	0.554176	0.334908	0.306538	0.201905	-0.374356	0.232125	0.209984	-0.370049	0.437313	-0.647782	0.485069	-0.313591	-0.55236	0.153426	-0.0207306
TCGA-ED-A66X-01	0.00542551	0.553449	0.2863	0.384511	0.436799	0.134913	0.188336	0.376889	0.250589	8.98e-05	-0.342334	0.23227	0.0721543	0.104077	0.551314	0.271229	0.196283	-0.314627	-0.16868	0.391192	0.288488	0.268226	0.242933	0.468252	0.0394744	-0.34759	-0.228949	0.0699499	0.0641781	0.553961	-0.146443	0.38529	0.450168	0.429053	0.460584	-0.0540619	-0.191177	-0.169023	-0.659765	0.0904535	0.244921	-0.69437	-0.362523	0.521886	-0.58986	-0.607006	-0.434209	0.0990254	-0.122402
TCGA-ED-A66Y-01	0.378418	-0.271101	0.0848115	-0.348435	0.135047	0.0399765	0.273429	-0.114983	-0.30689	-0.37333	-0.485561	-0.463409	0.197381	0.260795	-0.354546	-0.241743	0.400751	-0.398327	-0.0627968	0.198207	0.271476	0.458688	-0.0218363	-0.206744	-0.297408	-0.350011	0.248512	-0.00243885	-0.0882712	0.199463	-0.565845	-0.498655	0.0623977	0.161748	0.053741	-0.489026	-0.388493	-0.365503	-0.590331	-0.199336	-0.30626	-0.649608	-0.624392	-0.698996	-0.762155	-0.678356	-0.592046	0.0635059	0.217153
TCGA-ED-A7PX-01	0.138556	-0.0463765	0.432766	0.0715025	0.144213	-0.154518	-0.179823	-0.0268236	-0.0522088	-0.373838	-0.605255	-0.355435	0.193943	0.248643	0.164302	0.198436	-0.106885	-0.256165	-0.394575	0.416661	0.506671	0.550507	0.344894	0.296367	0.387992	-0.270144	-0.0143431	0.143489	-0.173254	0.498558	-0.13566	-0.089994	0.36231	0.415568	0.350878	-0.360997	-0.106718	-0.268816	-0.317775	-0.0353847	0.198432	-0.356437	-0.77747	-0.374963	-0.833619	-0.39972	0.404043	0.171491	0.174959
TCGA-ED-A7PY-01	-0.460766	-0.0943372	-0.357132	-0.49496	-0.572433	-0.0153627	-0.130837	-0.0438183	-0.105068	-0.030707	0.161464	0.00792032	-0.0207279	-0.0837861	-0.323549	-0.652144	0.577448	-0.230936	0.0503575	-0.553991	-0.155868	-0.314309	-0.239514	-0.342595	0.126061	-0.368372	-0.495344	0.216809	0.28164	-0.249027	-0.387054	-0.543241	-0.302249	-0.3393	-0.27748	-0.280094	-0.516801	-0.380571	-0.475792	-0.484469	-0.566022	-0.4136	0.230341	-0.160349	-0.184406	-0.303889	0.0493732	-0.257598	-0.266488
TCGA-ED-A7PZ-01	-0.282299	0.312368	-0.362985	-0.00245563	-0.462198	-0.229224	0.354373	-0.0693641	-0.0978476	-0.254277	-0.266891	0.0899991	-0.351405	-0.466194	0.0904871	-0.0374507	-0.188334	-0.320496	-0.0481871	0.450951	-0.236035	0.136813	-0.244145	0.121357	0.345071	-0.205546	-0.661893	-0.215984	-0.149634	-0.434787	0.172666	-0.555153	-0.28153	-0.331879	-0.345643	0.178988	0.417972	0.154849	-0.482307	0.0613983	-0.327149	-0.413415	-0.0886967	0.222336	-0.482113	-0.223725	0.643258	-0.104379	0.0181681
TCGA-ED-A7XO-01	-0.298138	-0.309481	-0.165739	-0.1841	0.262532	0.024825	-0.226727	-0.160528	-0.364476	0.312639	0.0565796	-0.204747	-0.365129	-0.357478	-0.173605	-0.244079	-0.252016	-0.0437538	0.284448	-0.315046	-0.0889164	-0.371328	-0.0609523	-0.108325	0.224908	0.306984	-0.0659619	0.00288798	0.116369	0.0185894	0.347618	0.37801	0.0712145	-0.00883185	0.0886792	0.27985	0.0171658	0.375663	-0.154078	0.0729471	0.26467	-0.291881	0.296869	-0.362373	0.395226	-0.114902	0.105032	-0.0641672	0.0345825
TCGA-ED-A7XP-01	0.0764771	0.288408	0.416677	-0.176753	-0.0107677	-0.100079	-0.109837	-0.00882646	0.0421678	-0.0454753	0.0941333	-0.058146	0.0615036	-0.124115	-0.270388	0.00529702	0.180181	0.354726	-0.271956	0.326842	0.24342	-0.0305625	0.301208	0.0530192	-0.0483044	0.0297312	-0.195754	0.100174	0.074439	0.0249089	-0.30152	0.23874	0.178147	0.14759	0.245709	-0.327627	-0.119644	-0.0333575	0.28653	-0.156847	0.0540535	0.237353	-0.440382	-0.568981	-0.186715	0.00996152	-0.133627	0.0264491	-0.283862
TCGA-ED-A82E-01	0.0319426	-0.105246	0.0616898	0.0665968	0.407069	-0.222129	0.399406	0.0245063	-0.00557736	-0.350479	-0.599421	-0.377886	0.166928	0.104265	0.147109	0.305919	-0.0533283	-0.056012	-0.512337	0.397863	0.282491	0.469006	0.521279	0.0707387	0.270775	-0.618785	0.0671285	-0.0598977	-0.110144	0.221832	-0.188045	-0.365411	0.195996	0.176343	0.22698	-0.247303	0.329171	-0.251625	-0.731305	-0.225058	-0.193329	-0.76279	-0.688399	-0.760908	-0.784347	-0.592304	0.362803	0.117489	0.0711978
TCGA-ED-A8O5-01	0.103823	0.112025	-0.26431	0.0364397	-0.124459	-0.0693864	0.0870307	0.17762	0.180844	-0.267383	-0.143479	-0.0320715	0.0265611	-0.24389	-0.249609	-0.375107	0.495188	-0.252151	0.00711814	0.0202115	0.267321	0.569208	-0.0183626	-0.152799	-0.291784	0.278719	0.132406	-0.121874	-0.0710742	-0.0617911	-0.262146	-0.118794	0.00379563	0.133835	-0.0995502	-0.24204	-0.25497	-0.28642	-0.476885	-0.209802	-0.26828	-0.495435	-0.168461	-0.463694	-0.557357	-0.513201	-0.545688	-0.026926	-0.112335
TCGA-ED-A8O6-01	0.0529151	-0.0962084	-0.245503	0.0867664	0.350865	-0.128244	-0.195417	0.250288	0.302789	0.0995637	0.0705164	0.275426	-0.0190523	0.379636	0.207868	-0.143079	0.336379	-0.472793	-0.100526	-0.0410653	-0.25905	-0.172643	-0.393312	-0.11605	-0.0862007	-0.0227313	-0.43681	0.208464	-0.0992684	-0.00878642	0.262453	-0.155064	0.0702291	0.101042	0.0825205	-0.38081	-0.427118	-0.370331	-0.430023	0.0409932	-0.327659	-0.447606	-0.423876	0.546637	-0.558314	-0.341113	-0.451577	-0.00346957	-0.0399692
TCGA-ED-A97K-01	0.129145	0.126657	0.557696	0.159277	0.258169	-0.110709	0.302631	0.126381	0.0874028	-0.111599	-0.249018	-0.0650822	0.25314	0.368328	0.414557	0.0190033	0.0260219	0.0159703	-0.663137	0.215938	0.308084	0.504225	0.145978	0.193375	-0.309422	-0.429442	0.504501	0.343027	-0.343108	0.350492	0.0790945	0.23553	0.395952	0.377531	0.410915	-0.127193	-0.570617	-0.188239	-0.63963	0.0986974	-0.203419	-0.695513	-0.687261	-0.722842	-0.721992	-0.572743	-0.62214	0.047368	-0.0357174
TCGA-EP-A12J-01	0.214614	0.220599	-0.0869779	0.406045	0.205777	0.142089	0.209606	-0.0441995	-0.0806225	-0.159512	0.111235	-0.0564182	0.0824026	-0.265196	-0.0744341	0.185983	-0.406485	0.15699	0.054773	0.389282	0.182924	0.379987	-0.174817	0.0111128	-0.248682	0.165311	0.171853	-0.204585	0.178619	-0.0932273	0.0903445	-0.264837	-0.186345	-0.0346735	-0.215337	0.0399274	0.529872	-0.128214	0.329521	-0.261485	0.0494446	0.437745	0.573942	0.57437	0.645071	0.295678	-0.137515	0.124831	0.151346
TCGA-EP-A26S-01	-0.211482	0.0901712	-0.223141	-0.0856353	-0.24211	-0.0101352	0.152658	-0.229453	-0.144333	-0.196799	0.144278	-0.0706259	-0.146829	-0.348284	-0.270835	-0.187903	-0.11539	0.0136683	0.161736	0.21237	0.185307	0.453651	-0.0595452	-0.300553	-0.301238	0.157494	0.505472	-0.0041325	-0.281303	-0.451335	-0.468405	-0.508002	-0.25095	-0.0846206	-0.321383	0.0537532	0.291366	-0.330308	0.128514	-0.274277	-0.201974	0.305662	0.675472	0.158638	0.549539	0.286664	-0.0885678	-0.0814555	-0.0659804
TCGA-EP-A2KA-01	-0.239175	0.326769	0.106257	0.268011	0.223345	-0.306701	0.333318	-0.137237	0.00438721	-0.184453	-0.0389338	-0.214369	-0.204801	0.349748	-0.0695192	0.0523391	-0.344368	-0.190008	-0.0523723	0.349591	-0.245726	0.484948	0.0150234	0.0567832	-0.187599	-0.0360407	0.469117	-0.0693528	-0.312027	0.236451	-0.0734468	0.709499	-0.264676	-0.395461	-0.334039	-0.102297	-0.457255	-0.0296431	-0.285315	0.0699768	-0.263964	-0.151162	-0.476845	-0.236602	-0.699617	-0.315435	-0.0735916	0.0352408	0.174246
TCGA-EP-A2KB-01	-0.391421	-0.517208	-0.308943	-0.28674	-0.0481994	-0.100717	-0.0791905	-0.103241	-0.0938163	-0.205172	-0.0943686	-0.444282	-0.204851	-0.247827	-0.508848	-0.588078	0.395357	-0.123805	0.191929	-0.321465	0.295125	0.327587	-0.107483	-0.301242	-0.426701	0.297358	-0.282867	-0.113872	0.0184854	-0.137631	-0.168578	-0.360631	-0.455193	-0.319744	-0.454197	-0.245761	-0.576352	-0.363861	-0.438301	-0.43117	-0.45894	-0.466881	-0.0372383	-0.0918957	-0.0565324	-0.223283	-0.281025	-0.119239	-0.0731401
TCGA-EP-A2KC-01	0.0819353	0.551244	-0.263656	0.0354317	-0.29488	0.0916954	0.395876	0.0759077	-0.0479168	-0.239862	0.0804529	-0.0210778	0.210011	-0.367899	-0.410179	-0.122984	0.0998012	0.310762	-0.1855	-0.227918	0.0323248	0.146064	0.205575	0.0144033	-0.252518	0.280574	-0.0580017	-0.223246	-0.0917809	-0.383712	-0.430924	-0.0959069	-0.180042	-0.0947666	-0.206855	-0.374666	-0.484696	-0.186076	0.236724	-0.302635	-0.384954	0.475006	0.212191	-0.0923285	0.450119	0.349403	-0.354898	0.0190998	0.0158549
TCGA-EP-A3JL-01	-0.529288	-0.57111	-0.00264952	-0.307688	-0.534013	-0.268027	-0.616909	-0.129799	-0.0588491	0.34845	0.366643	0.237818	-0.505745	-0.0890956	0.393818	0.0648463	-0.552261	-0.143891	-0.468788	-0.538413	-0.55011	-0.557248	-0.480125	-0.359869	0.220789	-0.0893265	-0.802384	0.058189	0.0484404	-0.193353	0.150763	0.483099	-0.00201681	-0.212941	0.0139457	-0.232538	-0.189616	-0.159216	0.308327	-0.237444	-0.301314	0.351048	-0.446465	0.171769	0.241645	0.434455	0.0450171	-0.222054	-0.21063
TCGA-EP-A3RK-01	0.211654	0.494394	0.247634	0.444169	0.210168	0.0553215	0.0664807	0.138294	0.110125	0.0344788	-0.192963	-0.208643	0.3717	0.313652	0.649289	0.549062	-0.241173	-0.131049	-0.294062	0.442509	0.306351	0.414422	0.184772	0.420035	0.114446	0.296643	-0.468455	-0.172504	-0.00148635	0.130006	0.280413	0.665283	0.0621107	0.0479512	0.0539519	0.102584	-0.00546478	0.160408	0.279978	0.212451	0.173819	0.360331	-0.0485626	0.232565	0.413535	0.262309	0.172344	0.204504	0.270998
TCGA-ES-A2HS-01	-0.481732	-0.59945	-0.291871	-0.346747	-0.342362	-0.104316	-0.288481	-0.282637	-0.420729	0.351041	0.239814	-0.0732799	-0.420668	-0.135021	-0.222895	-0.0844614	-0.30992	-0.375958	0.0544842	-0.679392	-0.632094	-0.628721	-0.51664	-0.291207	0.0999865	-0.0921133	-0.66159	-0.300045	0.0971115	-0.380825	-0.0610953	-0.643118	-0.260029	-0.333672	-0.214425	-0.152291	-0.363101	-0.21339	0.420344	-0.162096	-0.142372	0.30342	0.355282	-0.368241	0.33727	0.501778	0.247075	-0.322111	-0.203118
TCGA-ES-A2HT-01	-0.396146	0.0943453	0.0109519	0.0953761	-0.611222	-0.273627	-0.431696	-0.364569	-0.280179	0.268698	0.350341	-0.123072	-0.32919	-0.236425	-0.0572077	0.261314	-0.0753618	-0.174172	-0.432067	-0.449355	-0.675874	-0.754953	-0.461175	0.0694148	0.328415	0.145441	-0.683558	-0.144889	0.249075	-0.29061	0.402093	-0.0925812	-0.146556	-0.301095	-0.126105	0.24726	0.347586	0.0786368	0.27172	0.0915356	-0.106203	0.296236	0.220537	-0.184108	0.211301	0.519655	0.527094	-0.290097	-0.227695
TCGA-FV-A23B-01	0.22253	-0.546168	0.181255	-0.31265	0.124264	-0.0670885	0.0551807	-0.0543677	-0.106445	-0.210358	-0.239798	0.113383	0.0392586	-0.141317	-0.0995177	0.0337013	0.481229	-0.114015	0.06292	-0.0711503	0.351224	0.477728	-0.343361	-0.197608	-0.302868	-0.194997	0.0500183	-0.0972328	0.215296	0.118981	0.228636	0.370204	0.0173924	0.0495574	0.000373659	-0.339079	-0.233272	-0.41513	-0.382082	-0.337899	-0.124292	-0.463769	-0.270527	0.059459	-0.307045	-0.44791	-0.425419	0.101807	0.113497
TCGA-FV-A2QQ-01	-0.047436	0.088934	0.1109	-0.246458	-0.000251272	0.397499	-0.298897	0.228191	0.0560325	0.421233	0.201026	0.225059	-0.164406	0.150468	0.528238	0.421358	0.338572	0.0190889	0.0184753	0.548887	-0.0690573	-0.249697	0.209564	-0.0525268	0.104467	0.250534	-0.537639	-0.188255	0.409247	0.245679	0.11156	0.473865	-0.121508	-0.143016	-0.113685	0.516406	0.647	0.395667	0.565362	0.400541	0.243234	0.655021	0.659472	0.105032	0.581288	0.514612	0.27491	-0.00040654	0.0612616
TCGA-FV-A2QR-01	0.626414	0.142688	0.161451	0.44405	0.277968	0.400457	0.517925	0.142672	-0.126872	-0.259413	-0.403325	-0.120487	0.266488	0.0609338	0.220951	-0.0662212	0.23249	0.0674326	-0.0710117	0.307874	0.0152722	-0.117966	0.348685	0.409809	-0.0301091	0.1367	0.420798	-0.0987428	-0.0112335	0.390397	0.0256903	-0.507441	0.251462	0.234486	0.343984	0.179215	0.300797	-0.0103005	0.323916	0.380525	0.422748	0.193751	-0.144225	0.477742	0.429703	0.156945	0.123798	0.2248	0.167051
TCGA-FV-A3I0-01	0.0859919	0.0359315	0.367384	0.0639587	0.424249	-0.272319	0.190441	0.00623841	0.0618865	-0.329109	-0.496913	-0.347476	0.162745	0.402579	0.0663915	0.274764	-0.301893	-0.448625	-0.617746	0.288843	0.0596658	0.160608	0.455963	0.250848	0.195709	-0.523417	0.359519	-0.0192469	-0.0148192	0.193884	-0.334495	-0.329517	0.356363	0.259464	0.318691	-0.19805	-0.427948	-0.174874	-0.543548	0.0530385	0.0271923	-0.54442	-0.787376	-0.792148	-0.758731	-0.460764	0.0604064	0.108876	0.0919449
TCGA-FV-A3I1-01	0.270279	0.63629	0.0667235	0.441277	0.316785	0.23229	0.236966	0.230518	0.155442	0.168167	-0.183004	0.141483	0.224008	-0.0964025	0.217741	0.121657	-0.217431	0.305833	0.595752	0.578361	0.0890674	0.281196	0.242818	0.489125	-0.28554	-0.320523	0.205018	-0.154955	-0.106357	0.538513	-0.105796	0.422043	0.393485	0.351801	0.359242	0.401589	0.464318	0.278193	0.423909	0.303487	0.575021	0.455289	0.491288	0.57495	0.0504747	0.139569	-0.484247	0.227471	0.243267
TCGA-FV-A3R2-01	0.305706	0.527642	0.126989	0.614749	0.23699	0.174906	0.365761	0.0590205	-0.14929	-0.326013	-0.192059	-0.37696	0.116383	0.175882	0.413938	0.211035	-0.178925	0.317494	0.644011	0.570988	0.195915	0.294004	0.199869	0.315864	-0.264827	0.0288671	0.273205	-0.360785	0.233556	0.0728853	-0.23081	-0.30408	-0.307136	-0.153251	-0.338028	0.17481	0.646408	0.267397	0.178237	-0.14803	-0.00586198	0.25886	0.33673	0.540103	0.254415	0.214042	0.191247	0.0848133	0.320253
TCGA-FV-A3R3-01	-0.0573164	0.363221	0.650394	0.371537	0.464094	0.351385	-0.0706723	0.372553	0.389685	0.186958	0.0626839	0.095532	0.364904	0.257388	0.395695	0.578757	0.261528	0.194624	0.159394	-0.302781	-0.0359527	-0.342147	-0.0897533	0.397061	0.277923	0.307313	0.214391	0.182192	0.574229	0.361088	0.350251	0.0753314	0.421392	0.487662	0.460581	0.120467	0.485453	-0.15904	-0.289691	0.115063	0.202918	-0.0967208	0.199938	-0.539485	-0.37402	-0.19119	0.00240201	-0.0400086	-0.320512
TCGA-FV-A495-01	-0.331075	-0.45962	-0.0794884	-0.0718079	0.243454	-0.0767928	-0.360739	-0.17874	-0.227866	0.356899	0.178465	-0.112312	-0.389608	0.359672	0.442864	0.144858	-0.257528	-0.134289	-0.241156	-0.415789	-0.523417	0.0864152	-0.203716	-0.166106	0.449818	-0.353386	-0.444308	-0.169004	-0.120418	0.00954412	0.0125043	0.379287	0.119156	-0.0147717	0.173262	0.116575	-0.357661	-0.045298	-0.298949	0.0610146	0.161332	-0.275633	0.240362	-0.0442712	0.179931	0.111615	0.320202	0.118884	0.129661
TCGA-FV-A496-01	0.226493	-0.505687	-0.38953	-0.0660622	-0.499727	-0.383141	-0.06899	-0.191196	-0.362196	-0.441429	-0.425792	-0.0905872	-0.134149	-0.246254	-0.577745	-0.598539	0.067338	0.169368	0.0721182	-0.311491	-0.256907	-0.274569	0.129765	-0.258979	-0.360628	-0.389381	0.248261	-0.00664628	-0.423771	-0.396613	-0.125968	-0.650824	-0.352811	-0.398606	-0.355742	0.0148794	-0.0169015	0.268152	0.0832575	0.123571	0.0475364	0.0603542	-0.234574	0.371022	0.014737	-0.0434772	-0.442406	-0.214223	-0.186685
TCGA-FV-A4ZP-01	-0.478195	-0.502913	-0.291833	-0.212088	-0.212432	-0.330036	-0.339985	-0.303057	-0.343007	-0.0650419	-0.329877	-0.192551	-0.489384	0.114407	-0.249476	-0.0812123	-0.359376	-0.423199	-0.432439	-0.225131	-0.597759	-0.272569	-0.169839	-0.13165	0.359271	-0.42615	-0.579474	-0.345416	-0.463346	-0.0609963	0.343989	0.0462103	0.0215956	-0.223402	-0.0497117	-0.198493	-0.624988	-0.120926	-0.0675631	-0.0497121	0.114144	-0.089871	-0.525166	-0.013313	-0.601534	-0.227573	0.178561	-0.0932489	0.0604321
TCGA-FV-A4ZQ-01	0.356503	0.203451	-0.0944834	-0.00470044	0.177918	-0.00204222	0.390083	0.211495	0.0989649	-0.404384	-0.43426	-0.111309	0.240949	-0.233455	-0.00392272	0.348277	0.111783	0.10794	0.354433	0.518774	0.469216	0.632534	0.290089	0.179216	-0.280793	0.056507	-0.45389	0.144987	-0.121058	0.200056	0.328883	0.685888	-0.163422	-0.110205	-0.14846	0.0708536	-0.11454	0.00847959	-0.192561	0.0217926	0.0948632	-0.187613	-0.155172	0.621853	-0.326326	-0.221998	-0.345176	0.124674	0.290718
TCGA-G3-A25S-01	-0.211899	-0.0496921	-0.386111	0.016467	-0.559557	-0.335541	0.101231	-0.162587	-0.143249	-0.124486	-0.170098	-0.242264	-0.36274	-0.111659	-0.0490386	-0.38394	0.18509	-0.23809	0.124072	0.450619	-0.167463	0.308272	0.25502	0.0649304	0.044943	0.235783	-0.322257	-0.389607	-0.389007	-0.186548	0.343304	-0.0949695	-0.375222	-0.471511	-0.445455	-0.151208	-0.124074	0.201834	0.296398	0.170736	-0.280635	0.164899	-0.224733	-0.369428	-0.00957721	0.195544	0.508972	-0.0170874	0.269059
TCGA-G3-A25T-01	-0.150169	-0.282557	0.139125	0.422278	0.13358	-0.271029	0.378903	0.0040206	0.0882788	-0.212984	-0.503151	-0.400208	0.084336	0.0532207	-0.134952	-0.177208	-0.335039	-0.106623	-0.299223	0.229273	-0.164348	0.14019	0.304413	0.191729	0.437138	-0.365627	-0.0125147	-0.0732028	-0.0153818	0.397695	0.050908	-0.129935	0.142975	0.0120896	0.157977	-0.200012	0.252054	0.0430768	-0.614962	-0.0398097	0.00491849	-0.717438	-0.41788	-0.68771	-0.714542	-0.537811	0.534231	0.0751215	0.234775
TCGA-G3-A25U-01	-0.0729353	-0.459962	-0.367067	-0.498987	-0.459194	-0.0914401	0.265525	-0.379184	-0.361264	-0.171177	-0.0480117	-0.254973	-0.213565	-0.306382	-0.616089	-0.652573	-0.0350405	0.0656529	0.18718	-0.160233	0.248418	-0.0876011	-0.255279	-0.492336	-0.388607	-0.366843	0.584661	0.0431365	-0.0786923	-0.314018	-0.141192	-0.613756	-0.372723	-0.427322	-0.406189	-0.039665	0.129586	-0.0535734	0.304801	-0.14628	-0.153278	0.421473	0.466919	0.135075	0.468169	0.319302	-0.410859	0.0059196	0.220905
TCGA-G3-A25V-01	0.126902	-0.221772	0.440216	0.046968	0.162393	0.473606	-0.440358	0.313276	0.42827	0.572326	0.558322	0.602095	0.0951312	0.290255	0.266639	0.346605	-0.0841518	0.381798	0.194921	-0.367451	-0.342081	-0.503577	-0.0732819	0.175986	0.213575	0.463615	-0.275981	0.0892839	0.43864	-0.076857	-0.0540731	0.500194	0.298886	0.195901	0.370913	0.495023	0.344902	0.280531	0.638501	0.151795	0.224981	0.689139	0.608467	-0.66065	0.453035	0.483616	-0.0477868	0.110921	-0.0476842
TCGA-G3-A25X-01	0.190727	-0.0670949	0.258168	0.0911129	0.397232	-0.233822	0.400556	0.0660135	0.067908	-0.0401344	-0.438619	-0.0315417	0.00195413	0.465619	0.448904	0.297862	0.236742	-0.176652	-0.312585	0.29366	-0.127638	0.037033	0.268193	0.28127	0.426061	-0.0120283	-0.184494	-0.166511	-0.188268	0.294932	0.451558	0.422517	0.35684	0.338029	0.350085	-0.160784	-0.567639	0.119379	-0.406326	0.211569	0.0792416	-0.470435	-0.678614	-0.523994	-0.688048	-0.398406	0.318252	0.312626	0.24836
TCGA-G3-A25Y-01	0.471771	0.261386	0.342815	0.286012	0.458477	0.228595	0.508756	0.127589	0.0701869	-0.11325	-0.01615	-0.0853669	0.306836	0.286556	0.394757	0.192997	0.380201	0.042714	-0.0729992	0.215578	0.393065	0.606294	0.353557	0.322257	0.158013	-0.0234681	0.670114	0.152731	0.248317	0.382543	-0.204202	0.440084	0.402536	0.367494	0.378933	-0.29299	-0.0310816	0.0812226	-0.635797	0.0899771	0.227637	-0.687726	-0.483166	0.0509793	-0.622683	-0.526522	-0.0584613	0.411935	0.414417
TCGA-G3-A25Z-01	-0.160844	-0.192659	-0.337909	-0.202174	-0.279926	-0.0554073	0.176486	-0.213946	-0.156457	-0.0355183	-0.112932	-0.145801	-0.278028	-0.164333	-0.26095	-0.18902	0.370466	0.464425	0.0684142	-0.0498225	-0.090106	-0.399402	-0.0880547	-0.0676612	0.243318	-0.00802173	-0.110667	-0.355148	-0.0951311	-0.0103274	-0.188693	-0.403624	-0.1814	-0.273339	-0.128309	0.208651	0.619189	0.541473	0.30502	0.269137	0.447266	-0.0793043	0.318936	0.527387	0.172876	0.229891	0.633436	0.0984845	0.182826
TCGA-G3-A3CG-01	0.479547	0.11441	0.346429	0.426685	0.00890689	0.377829	0.480601	0.0326043	0.044632	-0.124063	0.193381	-0.180556	0.060656	0.12457	0.140554	0.360178	0.102872	0.335807	0.0213164	0.449326	0.228252	-0.262572	0.372774	0.250345	0.0446427	0.134116	0.658993	-0.110376	0.142075	0.209661	0.00837978	0.213873	0.143125	0.127112	0.215946	0.263303	0.715757	-0.0252469	0.28834	0.156849	0.214905	0.409579	0.34428	0.0657293	0.344211	0.326223	0.162664	0.130165	0.111791
TCGA-G3-A3CH-01	-0.383123	-0.641923	0.324117	-0.284318	0.0129439	0.251872	-0.258913	0.0698394	0.354607	0.254789	0.467501	0.352099	0.153946	0.445696	-0.0440467	-0.408011	-0.183458	-0.0154633	0.332818	-0.596004	-0.282956	-0.111276	-0.543141	-0.331864	0.0651918	0.282788	-0.0949177	0.225127	0.364019	-0.0594626	0.146308	0.493302	0.376193	0.414267	0.393798	0.110823	-0.00852886	0.0453583	0.185002	-0.154106	0.0216117	0.217142	0.260738	0.301315	0.590694	0.307598	-0.398128	0.101822	0.0220056
TCGA-G3-A3CI-01	-0.452631	-0.644687	0.154132	-0.407768	-0.212163	0.158376	-0.608039	-0.214592	-0.449762	0.188104	0.199963	-0.259805	-0.336123	-0.103015	-0.367306	-0.426508	-0.512893	0.334893	0.295171	-0.651968	-0.665603	-0.593423	-0.5405	-0.372088	-0.198257	0.323898	0.224732	0.264515	0.327708	-0.496289	-0.169205	0.148805	-0.217175	-0.252749	-0.0841697	0.427463	0.485998	-0.224005	0.18521	0.193861	-0.0238389	0.350393	0.587288	0.514683	0.584007	0.297776	-0.309942	-0.364498	-0.572223
TCGA-G3-A3CJ-01	-0.589452	-0.297731	-0.423671	-0.470908	-0.397439	-0.198519	-0.382125	-0.308742	-0.307186	0.146013	0.351598	-0.0201623	-0.548754	-0.327003	-0.314863	-0.153451	-0.585295	0.237217	-0.463383	-0.58147	-0.525204	-0.716718	-0.325243	-0.526	0.10821	-0.044172	-0.502011	-0.291559	-0.100045	-0.585698	0.139684	-0.589046	-0.520107	-0.50026	-0.568803	0.052216	0.0088963	0.000568031	0.365471	-0.260532	-0.184116	0.461083	0.419559	0.372763	0.700903	0.489658	0.528965	-0.270432	-0.115958
TCGA-G3-A3CK-01	0.319959	0.253724	-0.077209	-0.0595818	-0.137458	0.105379	0.059245	-0.147247	-0.105622	-0.197627	-0.101168	-0.0918882	0.136157	-0.161826	-0.168433	0.111586	0.0117786	0.425934	0.375276	0.472237	0.367574	0.120469	0.150212	-0.0637139	-0.329633	0.155497	-0.1784	-0.34214	-0.0586179	-0.232109	0.147091	0.556775	-0.288328	-0.1386	-0.326341	0.24724	0.601973	0.361316	0.299631	0.249045	0.242221	0.495443	0.512485	-0.250406	0.659668	0.310603	-0.0719535	0.216177	0.278228
TCGA-G3-A5SI-01	0.32131	-0.388026	-0.412028	-0.157965	0.0288205	-0.125226	0.551043	-0.332386	-0.388957	-0.152806	0.0523378	-0.371481	-0.176176	0.0718037	-0.371375	-0.523198	0.580915	0.000205328	-0.159401	-0.0832805	0.511158	-0.267507	-0.127567	-0.146017	0.0486005	-0.294772	-0.0240414	0.137292	0.170966	0.0392244	0.0970233	-0.594781	-0.435931	-0.319292	-0.331185	-0.149964	0.209228	-0.102802	-0.0397783	-0.0795719	0.0299695	-0.0468015	-0.205041	-0.479387	0.20289	0.112646	0.52436	-0.00920352	0.22692
TCGA-G3-A5SJ-01	-0.0364401	-0.0376931	-0.0716637	-0.046907	0.0186209	-0.273444	0.173139	0.011346	0.10606	-0.0519827	-0.270267	-0.081482	-0.286842	-0.0120541	-0.292015	-0.148189	-0.478467	-0.366227	-0.241187	-0.106068	0.135418	0.0385088	-0.06506	-0.0244881	-0.0645013	-0.00280258	-0.157645	0.0535996	-0.261248	0.12969	0.0368491	0.536285	0.0528004	0.131509	-0.0229757	-0.288239	-0.563232	0.0946705	0.0436643	0.00745706	0.301261	-0.079024	-0.587394	-0.705078	-0.671916	-0.313946	-0.363331	-0.052992	-0.0227278
TCGA-G3-A5SK-01	-0.408856	-0.294872	-0.121451	-0.359978	-0.507659	-0.0909477	-0.266196	-0.276474	-0.105518	0.157647	0.446121	0.1171	-0.168445	-0.258873	-0.66782	-0.51304	-0.275448	0.292762	-0.261347	-0.743908	-0.398002	-0.655236	-0.496858	-0.370403	-0.251776	0.118966	-0.326821	-0.0192706	0.149201	-0.437834	-0.0720732	0.0113273	-0.228506	-0.327707	-0.271616	-0.0402668	-0.290175	-0.176716	0.480646	-0.114647	-0.254504	0.519881	0.4372	-0.636431	0.519125	0.415891	-0.453545	-0.406917	-0.457529
TCGA-G3-A5SL-01	-0.0216811	0.0480415	-0.27464	0.210733	-0.100328	0.0692999	0.215588	-0.0656157	-0.0637608	-0.137717	0.264527	-0.156407	-0.0758963	-0.1216	-0.179247	0.0642559	-0.447445	0.0220884	-0.0121979	0.154753	0.104301	-0.187106	-0.413043	-0.103154	-0.124884	0.447422	0.329117	-0.187977	-0.00474055	-0.0704454	0.0255883	-0.486713	-0.0291345	0.0859908	-0.0929931	0.218333	0.623734	-0.205588	0.598383	-0.0470793	0.168894	0.713648	0.707659	0.885686	0.735957	0.619516	0.0496494	-0.0541918	-0.0872107
TCGA-G3-A5SM-01	-0.246241	0.0101083	0.42917	0.070396	-0.259311	-0.0725068	-0.420252	-0.12807	0.0102245	0.291377	0.315848	0.2345	-0.0422399	-0.165304	0.240779	0.282805	-0.212001	0.0954952	-0.17542	-0.492434	-0.384554	-0.606557	-0.220778	0.125209	0.175173	0.173916	-0.23453	-0.0272953	0.339661	-0.050092	0.294194	0.423717	0.374958	0.352835	0.424503	0.399697	0.457737	0.305395	0.418582	-0.00536159	0.109959	0.353063	0.147558	-0.537551	0.476023	0.490799	0.0186506	-0.11646	-0.363187
TCGA-G3-A6UC-01	0.00165848	0.406928	-0.280493	0.0993494	-0.206202	-0.0868953	0.331824	-0.229143	-0.238208	-0.184916	0.16529	-0.0977462	-0.0522512	-0.396985	-0.293204	-0.160707	-0.374721	-0.182164	-0.0574192	-0.101872	-0.0145969	0.0601266	-0.135516	-0.157542	-0.484202	-0.261954	0.215095	-0.0191262	-0.0758868	-0.47332	-0.163957	-0.581482	-0.442832	-0.411932	-0.422959	-0.0258456	0.341487	-0.359941	0.0510556	-0.205571	-0.0525881	0.217318	0.461302	0.417637	0.798276	0.31634	-0.421328	-0.350238	-0.285929
TCGA-G3-A7M5-01	-0.545667	-0.259685	-0.44078	-0.0804548	-0.535949	-0.0364208	-0.268236	-0.303269	-0.335018	0.0840119	0.386396	-0.106461	-0.37671	-0.242715	-0.0457815	-0.458286	-0.257866	0.197866	0.12024	-0.433668	-0.466394	-0.294302	-0.102922	-0.221559	-0.0589065	0.328163	0.092331	-0.363949	0.127545	-0.602528	-0.0991976	-0.463309	-0.464441	-0.554859	-0.45917	0.139705	0.257075	0.21867	0.00233439	-0.0969268	0.102933	-0.00705116	0.432843	0.396341	0.661195	0.32225	0.360012	-0.206172	-0.219226
TCGA-G3-A7M6-01	0.0281834	0.213589	0.105812	0.0272706	0.265351	-0.328877	0.452552	0.165743	-0.053257	-0.466119	-0.535406	-0.296992	0.0272852	0.211041	0.0166672	0.0507293	-0.0576452	-0.361368	-0.385357	0.185702	0.381509	0.555964	0.322346	0.0966521	-0.185567	-0.649197	0.107264	-0.0120346	-0.519084	0.394777	-0.0575382	0.134717	0.272168	0.342292	0.305515	-0.433344	-0.735154	-0.291712	-0.562608	-0.192299	-0.454801	-0.54719	-0.724958	-0.708454	-0.740647	-0.561464	-0.525699	0.0614953	0.0738845
TCGA-G3-A7M7-01	-0.247835	-0.166639	-0.112363	-0.34773	-0.527568	0.104454	-0.380082	0.0456384	0.011041	0.19771	0.261931	-0.0400797	-0.203107	0.150443	0.501113	0.010222	-0.365173	0.0674	0.0334947	0.348214	-0.330382	-0.560239	0.0530496	-0.0108252	0.137271	-0.451052	-0.461047	0.0289936	0.312602	-0.0111859	-0.288843	-0.520643	-0.22644	-0.334427	-0.210293	0.140797	0.607228	0.363272	0.326745	0.150944	-0.0141406	0.469583	0.480464	-0.48592	0.410919	0.4559	0.501073	-0.121762	-0.133202
TCGA-G3-A7M8-01	-0.332278	-0.602885	-0.0163437	-0.469886	0.269282	0.0598866	-0.511391	-0.434878	-0.239505	0.196706	0.165035	-0.0681716	-0.319375	-0.285859	-0.556822	-0.43559	-0.400712	0.0889179	0.431549	-0.523442	-0.578536	-0.686999	-0.398735	-0.312964	-0.088997	0.314815	-0.0789705	0.018223	0.386965	-0.414216	-0.0807535	-0.619793	-0.145075	-0.137058	-0.0710702	0.305696	0.325697	-0.14826	0.449005	0.0211113	0.221124	0.548391	0.65648	-0.664477	0.572838	0.320222	-0.0210241	-0.206699	-0.388421
TCGA-G3-A7M9-01	0.248656	-0.474183	0.271532	-0.528849	0.534319	-0.200724	0.19083	-0.0128175	0.128864	-0.409808	-0.606621	-0.194299	-0.115078	0.321292	0.122753	0.0516867	0.46642	-0.379824	-0.205451	0.533412	0.603124	0.560283	0.0985425	-0.228558	0.0281489	-0.320876	-0.229629	0.232301	-0.666393	0.252227	-0.28009	0.0179236	0.206454	0.180232	0.200355	-0.303569	-0.178	0.0483457	-0.723745	-0.06275	0.106861	-0.748837	-0.775018	-0.560043	-0.878394	-0.73506	-0.223221	0.299853	0.267541
TCGA-G3-AAUZ-01	-0.503849	-0.644525	-0.220217	-0.307564	-0.392438	0.199311	-0.244618	-0.0920084	-0.156235	0.465095	0.362337	0.173571	-0.298544	0.0741457	-0.0499023	-0.456977	-0.193241	-0.0494515	0.365869	-0.694556	-0.548407	-0.244552	-0.482369	-0.305642	0.172748	0.205724	-0.488863	-0.183213	-0.0118354	-0.376088	0.129221	0.445881	-0.266474	-0.452109	-0.335258	0.0905911	-0.444829	-0.0709633	0.0449155	-0.15531	-0.211095	0.159649	0.498559	0.423821	0.572287	0.387918	0.257216	0.0255352	0.156726
TCGA-G3-AAV0-01	-0.579432	-0.509584	-0.218427	-0.4114	-0.638253	-0.0502419	-0.649559	-0.325755	-0.327446	0.196149	0.277679	0.0255185	-0.457622	-0.159043	-0.497992	-0.552502	-0.163302	-0.504555	-0.215862	-0.583258	-0.56124	-0.716008	-0.456371	-0.527622	-0.180065	0.115459	-0.342785	0.0587341	-0.096912	-0.587964	-0.246781	-0.360152	-0.500397	-0.573573	-0.47564	-0.0767884	-0.510548	-0.0956133	-0.0862931	-0.104305	-0.00256827	-0.0350405	0.416795	-0.400397	0.567191	0.144141	0.0613248	-0.413376	-0.348838
TCGA-G3-AAV1-01	0.205259	0.0850926	-0.0663342	0.133246	0.0675216	0.116087	-0.24849	0.049658	-0.0851376	-0.0728224	0.0769201	-0.196916	0.132324	-0.234621	0.231727	0.217579	-0.0769395	-0.0740765	-0.224126	0.545286	0.220129	0.342118	-0.112292	0.0057984	-0.14114	0.0590997	0.135907	0.107794	0.421859	-0.137835	-0.395958	-0.541207	-0.0102751	0.108684	-0.0862225	0.13502	0.387196	0.209365	0.485167	0.117517	0.23957	0.560252	0.239189	-0.0637025	0.500711	0.388023	-0.230892	0.0219955	0.0547899
TCGA-G3-AAV2-01	0.0490524	0.482363	-0.368256	0.437269	-0.101594	-0.0489651	-0.0266842	-0.16303	-0.305962	0.0116317	-0.00747521	0.0655771	-0.0681519	-0.387205	-0.18697	0.232004	-0.114348	-0.0744742	-0.2229	0.00823323	0.0365752	-0.124572	-0.0481868	0.0909071	-0.103003	0.403525	0.023903	-0.127987	0.0833251	-0.397803	-0.11307	-0.584614	-0.241511	-0.120046	-0.203345	-0.178933	0.208313	-0.0459505	-0.0880332	-0.133494	0.0678144	-0.0791089	0.556022	-0.404114	0.54277	0.0294233	0.100047	-0.192196	-0.185067
TCGA-G3-AAV3-01	0.339192	0.337013	-0.0516432	0.282018	0.118631	-0.16336	-0.440707	-0.124243	-0.0648647	0.148136	0.0079994	-0.236889	-0.0523999	-0.279941	0.0151943	0.524356	-0.2395	-0.109023	-0.152144	0.0769974	0.351441	-0.0746825	0.0137994	0.259491	-0.263502	0.237429	-0.175461	0.0457313	-0.0186468	-0.017253	0.284109	0.676683	0.0997791	0.0634311	0.0795521	0.0153665	0.222193	0.0608979	0.386037	-0.0879389	0.223584	0.4228	0.415769	-0.214335	0.60807	0.246503	-0.30661	-0.0169554	-0.0598801
TCGA-G3-AAV4-01	0.442936	0.527265	-0.0136811	0.429756	-0.0468365	-0.0430508	0.516936	-0.0210055	-0.0697864	-0.180362	-0.157479	-0.246285	0.418246	-0.279461	-0.15818	0.0883421	-0.23768	-0.0106678	-0.0212797	0.451023	0.438305	0.542496	0.325616	0.359318	-0.271778	0.0586853	0.502595	-0.202822	0.125812	-0.00856438	0.0776455	-0.360358	-0.273596	-0.104018	-0.387223	0.164649	0.35069	0.136392	0.0586355	0.0297979	0.104845	0.107632	0.545575	0.430994	0.291533	0.127865	0.253421	0.126143	0.294022
TCGA-G3-AAV5-01	0.130258	0.530949	-0.489102	0.419734	-0.150993	-0.207351	0.310051	-0.231294	-0.426152	-0.348016	-0.279569	-0.265273	-0.196715	-0.225661	-0.279392	-0.0177856	-0.0762807	0.0637215	-0.377161	0.644295	0.117441	0.337373	0.291294	0.149705	-0.10378	0.107179	-0.358732	-0.353227	-0.381012	-0.171345	-0.344325	-0.45425	-0.420795	-0.474926	-0.437866	-0.153214	0.234621	0.347522	0.451766	-0.236296	-0.144579	0.39937	0.266644	-0.179308	-0.0535102	0.265779	0.490973	0.0878798	0.311709
TCGA-G3-AAV6-01	0.018306	-0.335472	-0.0142937	-0.185578	0.167847	-0.357981	0.178654	0.0290106	0.168202	-0.238187	-0.40435	0.0755788	-0.111492	-0.241534	-0.0947935	-0.378195	0.471639	-0.350055	-0.50793	-0.0637695	-0.285258	0.299703	-0.144821	-0.197832	0.0117209	-0.0040764	-0.716216	-0.297771	-0.362668	-0.0807833	-0.0393636	-0.173152	-0.200029	-0.105571	-0.302025	-0.320989	-0.450637	-0.15339	-0.545973	-0.127962	-0.229996	-0.666517	-0.522302	0.340099	-0.5852	-0.536759	0.134314	0.264326	0.25293
TCGA-G3-AAV7-01	0.516406	0.518156	0.235674	0.249633	0.618303	0.0177426	0.457496	0.201311	0.132732	-0.239769	-0.501958	-0.182255	0.372031	0.494253	0.606391	0.475061	0.366796	0.313958	0.223451	0.415015	0.384372	0.319682	0.468559	0.438096	-0.208278	-0.144645	0.332773	-0.263574	-0.234511	0.448144	-0.179408	0.178535	0.202287	0.315784	0.192219	-0.0992159	0.139921	0.174691	-0.491794	0.130658	0.258001	-0.520124	-0.620379	-0.198974	-0.793368	-0.503512	-0.00302035	0.327344	0.387883
TCGA-GJ-A3OU-01	0.2194	0.568062	0.430271	0.433006	0.362632	0.163823	-0.122087	0.429103	0.408415	0.137933	-0.132803	0.134831	0.407437	0.202976	0.654411	0.555638	0.119365	0.109946	-0.238563	-0.137205	0.225929	0.0633917	0.445164	0.567617	0.261936	-0.0802611	-0.246555	-0.0278258	0.0909268	0.498695	-0.04855	0.650853	0.504416	0.458934	0.515472	-0.0765725	-0.36967	0.271598	-0.0956971	0.26881	0.0575483	-0.133901	-0.542928	0.189715	-0.441426	-0.094828	-0.0346474	0.251533	0.121711
TCGA-GJ-A6C0-01	0.302005	0.585141	-0.325453	0.128981	0.219495	-0.00812875	-0.33891	-0.0113274	0.230423	0.0367885	-0.233006	-0.0257293	0.448949	0.139241	0.402078	0.250349	0.144025	0.201147	0.221115	-0.0140046	0.150238	-0.477531	-0.0453454	0.426125	-0.184962	-0.13809	0.613792	0.0940154	-0.210586	0.344019	0.0714127	0.223913	0.15166	0.0755694	0.0760177	0.16881	-0.383525	0.251981	0.0287455	0.395396	0.53378	-0.176596	-0.382717	-0.536407	-0.0488826	-0.120818	-0.46546	-0.0178144	0.108769
TCGA-GJ-A9DB-01	-0.0433539	0.273883	-0.00655882	0.262539	0.110564	0.0819798	-0.0430011	-0.0232205	0.144753	0.0674118	-0.0420997	0.0777908	0.0861846	-0.1676	0.051278	0.427038	-0.144364	0.0504568	0.524226	0.293167	0.293179	0.234726	0.187729	0.383631	-0.341188	-0.310468	0.504409	0.0808206	-0.278523	-0.0231836	-0.181185	-0.415596	0.218018	0.340565	0.198142	0.342058	0.363994	0.163904	0.378537	0.317226	0.370392	0.367525	0.477036	0.422151	0.518793	0.118498	-0.464885	-0.0117379	-0.0620017
TCGA-HP-A5MZ-01	-0.491348	-0.241025	0.405863	-0.211491	-0.166111	0.245791	-0.592257	0.262649	0.39367	0.431335	0.452601	0.414292	-0.0998569	0.142347	0.466219	0.450257	-0.43253	-0.110295	-0.392584	-0.670052	-0.350419	-0.521375	-0.20722	-0.124849	0.340529	0.332419	-0.376136	0.393466	0.433372	-0.17531	0.0499186	0.563613	0.470032	0.391558	0.503966	0.286802	0.318028	-0.0597754	0.420395	-0.037323	-0.0880778	0.547379	0.252201	-0.0992235	0.399501	0.465856	-0.196443	-0.181881	-0.455181
TCGA-HP-A5N0-01	0.575601	0.0637948	0.377469	-0.216595	0.441113	0.258972	0.357337	0.129472	-0.00377436	0.0297527	-0.0584968	-0.115769	0.176703	0.0277352	0.303571	0.104384	0.037901	-0.0857873	0.181549	-0.24542	-0.350106	-0.289528	-0.00870425	0.0275001	-0.0607363	0.380299	-0.0253978	0.276189	-0.0780886	-0.252086	0.336987	-0.154169	0.354731	0.252982	0.400438	0.0388657	0.173624	-0.0910553	0.0770354	0.267087	0.226484	0.0327961	0.402378	-0.24499	0.670161	0.130085	-0.16736	0.066687	-0.134002
TCGA-K7-A5RF-01	-0.336193	-0.212315	0.526103	0.115783	0.187509	0.26931	-0.559506	-0.0144064	0.178141	0.454206	0.41551	0.223624	0.225814	0.408412	0.268944	0.27545	-0.324576	0.472073	0.169258	-0.58137	-0.536276	-0.663801	-0.253392	0.0436379	-0.0571476	0.480256	0.277704	0.198476	0.547906	-0.114451	0.142911	0.552148	0.342065	0.259777	0.41368	0.500608	0.314634	-0.0216539	0.551609	-0.0153624	0.432339	0.560101	0.69026	-0.295146	0.781149	0.483756	-0.418146	-0.0998331	-0.391204
TCGA-K7-A5RG-01	-0.30205	-0.491795	0.329879	-0.365857	-0.117851	-0.0720176	-0.51034	-0.0304071	0.00217405	-0.034378	-0.356633	-0.100834	-0.281498	-0.283454	-0.439872	0.116329	-0.277966	0.0416469	-0.0567201	-0.288992	0.184858	-0.375465	-0.0452287	-0.0310452	-0.258974	-0.0950364	-0.209384	0.421913	-0.361887	0.351811	0.0184814	0.727125	0.139911	0.0250553	0.133296	-0.051872	-0.422491	0.0367393	-0.378751	0.145229	-0.038263	-0.340352	-0.531379	-0.587443	0.0455789	-0.289977	-0.46838	-0.0895141	-0.220154
TCGA-K7-A6G5-01	0.282333	0.237079	-0.0446664	0.435251	0.130282	0.244981	0.167753	0.211107	0.364798	0.493037	0.434647	0.395418	0.0837761	0.177722	0.375447	0.225665	-0.0445524	0.102172	0.118556	-0.351792	-0.520201	-0.497691	-0.309812	0.358071	0.0566976	0.163349	-0.157353	-0.156016	0.367202	-0.152996	0.370238	0.448132	-0.0654582	-0.306855	-0.0828856	0.517795	0.659203	0.426836	0.550583	0.310431	0.150443	0.522435	0.656342	0.0321003	0.59825	0.566587	0.354864	-0.0929326	-0.0560425
TCGA-K7-AAU7-01	0.204669	-0.222009	0.339409	-0.236298	0.145112	-0.223221	0.0755557	0.140953	0.143778	-0.0642828	-0.156618	0.109184	0.0509239	0.114596	-0.00843459	0.0389894	-0.398336	-0.324386	-0.438924	0.125915	0.433853	0.395372	0.0642648	-0.00161544	-0.104546	-0.242975	-0.0218911	0.0628994	-0.440758	0.415763	-0.436615	0.245424	0.322553	0.309574	0.236021	-0.371408	-0.643573	-0.0255802	-0.273374	-0.157207	-0.0778434	-0.224035	-0.712595	-0.719414	-0.752686	-0.428634	-0.462205	0.0443485	-0.0691802
TCGA-KR-A7K0-01	-0.31131	0.412606	-0.0913986	-0.113023	-0.446411	0.130231	-0.403658	-0.089591	-0.160055	0.15353	0.172921	0.0956061	0.0951402	-0.138306	0.184721	0.175504	-0.201121	0.307535	-0.247695	-0.486964	-0.0251056	-0.268534	-0.439601	0.0374205	-0.0598679	0.184379	0.339082	0.153797	-0.0345335	-0.286617	-0.28859	-0.460159	0.0941427	0.133664	0.137717	-0.0342355	-0.303798	-0.108483	0.614075	-0.135986	-0.215788	0.631162	0.386777	-0.249668	0.369034	0.453389	-0.056289	-0.19755	-0.421785
TCGA-KR-A7K2-01	-0.574816	-0.486459	-0.337928	-0.574273	-0.500391	-0.322238	-0.548866	-0.0115898	-0.128351	0.0265336	0.383915	0.0700948	-0.514866	-0.0388365	-0.290221	-0.441692	-0.42182	-0.489232	-0.572794	-0.579335	-0.312617	-0.630047	-0.331217	-0.391911	0.280769	-0.13812	-0.536594	0.166201	-0.00937422	-0.240834	-0.245153	-0.218058	-0.0535329	-0.260952	0.0654583	-0.450382	-0.511501	-0.372077	-0.462583	-0.443515	-0.49725	-0.485992	-0.494536	-0.207151	-0.15967	-0.159214	0.0994224	-0.313929	-0.4196
TCGA-KR-A7K7-01	-0.195183	-0.429197	-0.405797	-0.51196	-0.189872	-0.21804	-0.305691	0.0199169	-0.150246	-0.191464	-0.205638	-0.109381	-0.377246	-0.197581	0.119129	-0.0174099	0.158318	-0.316055	-0.312537	-0.136114	-0.154423	-0.126346	-0.229171	-0.392426	-0.00398905	-0.213199	-0.629929	-0.171158	-0.427941	-0.312988	0.0323512	0.349513	-0.469293	-0.51325	-0.488683	-0.283288	-0.536975	-0.0330987	-0.473385	-0.153767	-0.26319	-0.475822	-0.458827	0.161358	0.0885043	-0.129446	0.274653	0.0406619	0.164616
TCGA-KR-A7K8-01	-0.354327	-0.0265764	-0.181693	-0.34094	-0.0435121	-0.00348042	-0.480899	0.139923	-0.125309	0.0453448	0.0548421	-0.0578693	0.0146769	0.0731431	-0.227113	-0.285605	-0.169721	-0.453077	-0.239173	-0.535332	-0.481545	-0.181744	-0.00684763	-0.030891	0.10155	0.05631	0.0497839	0.116538	-0.218324	0.0968253	0.228107	0.614289	0.205842	-0.0159029	0.258163	-0.253722	-0.671132	0.143808	-0.108599	0.246443	0.194963	-0.305774	-0.418233	0.246615	-0.0896232	-0.0769734	-0.29126	-0.167279	-0.258151
TCGA-LG-A6GG-01	0.555631	0.296029	0.0310168	0.211445	-0.00315512	0.222232	0.134901	0.14215	-0.0232453	-0.147584	0.120179	-0.014059	0.328703	0.313117	-0.074786	0.0409619	0.380076	0.357203	0.264676	0.426005	0.37376	0.342318	0.211375	0.283524	-0.290687	-0.0756552	0.5463	-0.132772	0.0619424	-0.0661216	-0.403229	-0.512677	-0.21345	-0.146329	-0.274375	0.00738146	0.369022	0.0839412	0.163914	0.095122	0.0206052	0.0267176	0.159551	-0.117141	-0.0846849	-0.0965078	-0.223804	-0.130936	0.169685
TCGA-LG-A9QC-01	0.0431106	0.260221	-0.187864	0.114076	-0.330986	0.0707456	0.030919	0.063384	-0.213405	-0.181458	0.0231378	-0.245618	0.195111	-0.166819	0.115352	-0.216131	-0.0314861	-0.146187	-0.162923	0.322904	0.1617	0.358286	0.288021	0.181427	-0.332336	-0.0471877	0.559562	-0.144067	-0.265191	-0.392102	-0.249548	-0.554597	-0.102569	-0.153035	-0.153485	0.0892051	0.219488	-0.145843	0.0102243	-0.152325	0.00155042	0.1853	0.414869	-0.0534922	0.332306	0.209329	0.113121	0.0213205	0.0642171
TCGA-LG-A9QD-01	-0.440442	-0.452696	-0.0688501	-0.389342	-0.471403	-0.190633	-0.558389	-0.275135	-0.259659	0.22079	0.4917	-0.094677	-0.333744	0.0796676	-0.30242	0.139275	-0.741073	0.258854	0.148059	-0.498349	-0.453193	-0.536115	-0.378639	-0.540724	-0.34889	0.271999	-0.431952	-0.0265065	-0.0705074	-0.380471	0.102971	0.322118	-0.278074	-0.436044	-0.275858	0.123173	-0.066058	-0.160148	0.0223651	-0.284097	-0.433419	0.0109373	0.568774	-0.216983	0.427312	0.32858	-0.23907	-0.304709	-0.277699
TCGA-MI-A75C-01	-0.394427	-0.185325	-0.512112	-0.269118	-0.608575	-0.194806	-0.38315	-0.0948292	0.059369	-0.0103485	0.129708	0.242589	-0.506005	-0.106775	-0.222913	-0.130595	-0.40833	-0.104093	-0.228144	-0.0133468	-0.496519	-0.597062	-0.285409	-0.422029	-0.040448	-0.293814	-0.541119	-0.00792557	-0.460527	-0.313631	-0.0464878	0.218854	-0.391469	-0.493574	-0.423317	0.0237839	-0.251486	0.251127	0.45636	-0.0384956	-0.376155	0.516848	-0.0213903	-0.359284	-0.119873	0.315047	0.251783	-0.126692	0.0455084
TCGA-MI-A75E-01	0.0258442	0.137518	0.365101	0.397552	0.257049	0.261977	-0.355721	-0.0749152	0.0757275	0.434472	0.482212	0.341717	-0.078196	0.0448311	0.434607	0.3481	-0.287873	0.190197	-0.220008	-0.35324	-0.347406	-0.565391	-0.271069	0.211656	0.28467	0.281023	-0.08063	0.0522952	0.332806	-0.0682741	0.24875	0.478702	0.350037	0.181492	0.347167	0.312005	0.179978	0.441511	0.584974	0.183601	0.0417353	0.541042	0.312032	0.124965	0.581927	0.507681	0.205987	0.0229435	0.024382
TCGA-MI-A75G-01	0.0577068	-0.0898411	-0.442424	0.268839	-0.401081	0.0350508	-0.158712	-0.169362	-0.422234	-0.0645832	0.0832539	-0.231498	-0.0801694	-0.329804	-0.28858	-0.0699457	-0.051632	-0.0756982	-0.311044	-0.347251	0.199574	-0.423753	-0.125963	-0.0187647	-0.135713	0.00482465	0.400024	-0.216425	0.255573	-0.237535	-0.0316573	-0.662381	-0.424969	-0.409334	-0.401051	0.05323	0.382833	0.0899624	0.43282	0.0999018	-0.296634	0.324989	0.227786	0.438336	0.623801	0.425724	0.280043	-0.180911	0.0124531
TCGA-MI-A75H-01	-0.22574	-0.00318663	-0.257775	0.0301267	-0.220246	-0.0799998	-0.160371	-0.175595	-0.244091	0.0250632	0.132452	-0.018442	-0.238308	-0.147513	-0.0668948	0.0934673	-0.531025	-0.30955	-0.479506	0.206085	0.0194717	-0.227962	-0.475484	-0.215518	0.0203407	0.26501	-0.57653	-0.196961	0.00178072	-0.384543	0.464865	0.384012	-0.29273	-0.270331	-0.216115	0.0149346	-0.209121	-0.258004	0.449555	-0.15137	0.183699	0.623569	0.466187	-0.310251	0.549747	0.477224	0.448073	-0.012797	0.030111
TCGA-MI-A75I-01	0.315878	0.621318	-0.466953	0.283708	0.157206	0.146421	0.340253	-0.0317802	0.0656605	-0.0707639	-0.131241	-0.193797	0.341925	0.287119	0.00172592	-0.0609761	0.0153185	-0.183553	0.241294	0.509978	0.249777	0.0014397	0.17688	0.446709	-0.150968	0.373919	0.0297516	-0.344126	-0.296426	0.0128177	-0.183249	-0.270272	-0.287071	-0.229418	-0.331514	0.239646	0.323625	0.184959	0.619852	0.194401	0.242096	0.527421	0.0814841	-0.388713	0.237375	0.4149	0.256986	-0.015492	0.179424
TCGA-MR-A520-01	-0.336218	-0.420044	0.0371293	-0.439452	-0.39492	0.146431	-0.47477	-0.26783	-0.136343	0.161559	0.37923	0.268682	-0.281746	-0.427839	-0.609838	-0.650708	-0.23109	0.346624	0.455105	-0.380852	-0.5775	-0.577207	-0.500475	-0.247789	-0.0881527	0.472273	-0.0244385	-0.030288	0.484867	-0.529327	-0.242854	-0.497199	-0.276337	-0.354142	-0.261776	0.460569	0.716443	0.0467116	0.47373	0.0327627	0.00366116	0.626891	0.70659	0.507915	0.720254	0.520619	0.13402	-0.316776	-0.47147
TCGA-MR-A8JO-01	-0.676953	-0.607002	0.01448	-0.549924	-0.222507	-0.267804	-0.626139	-0.157026	0.155007	-0.0697204	-0.217293	0.0642687	-0.551999	-0.354136	-0.0991982	-0.192247	-0.305807	-0.277587	-0.69656	-0.627557	-0.36448	-0.647499	-0.554917	-0.530807	0.321888	-0.243939	-0.599161	0.458921	0.110033	-0.334556	-0.0601871	0.266888	0.33233	0.175993	0.397309	-0.279343	-0.561998	-0.225921	-0.558085	-0.226389	-0.281471	-0.595236	-0.781401	-0.813965	-0.588769	-0.500735	-0.227788	-0.254457	-0.528106
TCGA-NI-A4U2-01	-0.591585	-0.44362	-0.256658	-0.408565	-0.647063	-0.140397	-0.599102	-0.333138	-0.2198	-0.0280768	0.0385268	0.0614878	-0.387875	-0.492076	-0.426714	-0.342486	-0.38756	-0.200489	-0.445548	-0.601096	-0.575629	-0.749356	-0.556794	-0.499524	0.0495345	-0.14259	-0.422922	-0.150361	0.144928	-0.517032	-0.215135	-0.657591	-0.295745	-0.34939	-0.325078	0.0935714	0.26724	-0.177419	-0.0869746	-0.477817	-0.216225	-0.000703593	0.352458	-0.69344	0.615417	0.0970073	0.377818	-0.487125	-0.592694
TCGA-NI-A8LF-01	-0.56785	-0.592378	-0.258831	-0.310024	-0.137515	0.0486861	-0.727005	-0.0243539	-0.00727988	0.195792	0.429922	0.306048	-0.243819	-0.0165118	-0.3854	-0.357957	-0.641684	-0.115059	-0.180541	-0.694212	-0.547815	-0.677573	-0.479619	-0.559518	-0.136372	0.155187	-0.426489	0.00670664	0.232041	-0.499788	0.00125825	-0.56895	0.0372322	0.0305344	0.0538347	0.00650439	-0.408139	-0.405849	0.384018	-0.455438	-0.565333	0.519176	0.486574	0.321905	0.659764	0.415802	-0.363171	-0.377283	-0.585902
TCGA-O8-A75V-01	0.138781	0.543137	-0.101124	-0.0974148	0.0157493	0.0950993	0.0845863	0.10824	0.148696	0.457591	0.47767	0.345918	-0.317643	0.257499	0.382771	0.243467	-0.313	-0.0272519	-0.0429038	-0.285682	-0.526811	-0.24254	-0.0713005	0.194002	0.31149	0.358757	-0.673531	-0.136038	0.323027	0.113255	0.305352	0.572235	0.0654067	0.0722822	0.0399517	0.0832752	-0.277832	-0.0179053	0.260598	0.118662	0.191585	0.291497	-0.0620366	0.625015	0.465506	0.321952	0.233968	-0.0346652	-0.0573968
TCGA-PD-A5DF-01	0.155823	0.0403588	0.123005	0.230569	0.415263	0.24628	-0.141242	0.181218	0.231675	0.119246	-0.184353	0.144365	0.151177	0.212357	0.31156	-0.07249	0.207171	0.207066	0.236333	0.257867	0.288984	-0.422587	0.308005	0.307845	0.208357	-0.129097	0.459301	0.0246018	-0.160216	0.500491	0.0600118	-0.0094075	0.320669	0.275214	0.295949	0.400464	0.17214	0.217706	0.0682389	0.227869	0.462007	0.153489	0.128555	0.0767687	-0.108753	0.079901	0.0764092	0.179436	0.313452
TCGA-QA-A7B7-01	0.367381	-0.125032	-0.214781	-0.481156	-0.320003	-0.121572	0.210747	-0.342496	-0.354183	-0.48335	-0.518357	-0.290217	-0.230247	-0.171178	-0.423149	-0.45259	0.286526	-0.215225	0.13813	0.230735	0.318906	0.329799	0.0387597	-0.462438	-0.367726	-0.462881	0.202477	0.0135347	-0.454953	-0.159744	-0.379753	-0.0904309	-0.440711	-0.461794	-0.46162	-0.088196	-0.336651	0.347296	0.0701717	-0.0794696	-0.00268566	0.0220312	-0.299927	0.299545	-0.584219	-0.149987	-0.21879	-0.110619	0.0746559
TCGA-RC-A6M4-01	-0.343819	0.29965	-0.546281	0.0495716	-0.236367	0.0226696	0.0964897	-0.144823	-0.195772	0.114909	0.382519	0.137061	-0.266088	-0.0977628	-0.539544	-0.43896	-0.67314	-0.185946	-0.078079	0.192796	-0.271774	-0.14052	-0.24468	-0.100316	-0.28314	-0.341489	-0.328724	-0.271299	0.0281268	-0.392562	-0.0165884	-0.630189	-0.517523	-0.37285	-0.493606	0.0948867	0.168029	0.0367668	0.606913	0.019048	0.0124072	0.699205	0.546711	0.685962	0.79011	0.675653	-0.0712138	-0.105759	0.210277
TCGA-RC-A6M5-01	-0.527807	-0.291432	0.401184	-0.12961	-0.0916692	-0.0152754	-0.508696	0.0554181	0.167952	0.0589536	-0.0134922	0.123431	-0.344605	-0.177477	0.187841	0.121441	-0.313729	0.125059	-0.337758	-0.468697	-0.215846	-0.633036	-0.470918	-0.20963	0.37919	0.0324672	-0.3832	0.327126	0.397973	-0.354884	-0.192886	-0.356949	0.236521	0.143328	0.355423	-0.0418281	0.273708	0.0242505	-0.494	0.0498935	-0.211486	-0.615627	-0.471262	-0.781335	-0.496002	-0.371408	0.119331	-0.164665	-0.48157
TCGA-RC-A6M6-01	0.228203	0.527785	0.244733	0.162537	0.346879	-0.247536	0.201305	0.0792492	0.220631	-0.115631	-0.224345	0.0341281	0.0770621	0.10195	0.0352647	0.157542	0.00986095	-0.445711	-0.125841	0.464716	-0.0154394	0.383472	0.191975	0.401759	-0.134073	-0.376333	-0.105811	0.0265834	-0.530701	0.443645	-0.202322	0.143095	-0.139808	-0.05025	-0.135042	-0.31931	-0.324442	0.118214	-0.195193	0.0163355	0.123984	-0.383697	-0.664562	-0.562395	-0.749207	-0.417714	-0.0300429	0.115989	0.309608
TCGA-RC-A7S9-01	-0.37755	-0.555866	-0.480598	-0.328448	-0.254738	-0.304198	-0.295603	-0.166967	-0.151562	-0.398806	-0.129727	-0.0916284	-0.360847	0.0704927	-0.593443	-0.308511	0.244566	-0.290334	-0.147083	-0.414739	-0.23193	-0.000504718	-0.309284	-0.446023	0.219386	-0.0252215	-0.399438	-0.0907298	0.200266	-0.332865	0.274115	0.375088	-0.261593	-0.384957	-0.230923	-0.306911	-0.171497	-0.201231	-0.225823	-0.0195844	-0.336138	-0.368569	-0.43297	-0.664724	-0.486597	-0.327295	0.40333	-0.0576877	0.0299011
TCGA-RC-A7SB-01	-0.45593	-0.136023	0.00198571	-0.0472186	-0.0525073	0.18381	-0.20287	-0.177132	-0.153268	-0.0367472	-0.193887	0.137828	-0.101697	-0.0795458	-0.275111	-0.117293	-0.467264	-0.342722	-0.0923848	-0.65336	-0.386284	-0.741142	-0.359607	-0.19042	-0.0839198	0.28835	0.220146	0.0988419	-0.228469	-0.472106	-0.477829	-0.533429	-0.373908	-0.299856	-0.371887	0.133297	-0.0424909	0.213169	-0.0844475	-0.299844	0.0876033	-0.329559	-0.000448592	0.474093	0.427618	-0.145679	0.177962	-0.367758	-0.420937
TCGA-RC-A7SF-01	-0.577331	-0.498038	-0.47146	-0.491704	-0.565366	-0.346796	-0.589817	-0.34761	-0.229408	0.0528959	0.276589	0.0390786	-0.373804	-0.392181	-0.48582	-0.612684	-0.555071	-0.342901	-0.172441	-0.696784	-0.615802	-0.549263	-0.672826	-0.513353	-0.0713903	-0.0203357	-0.370222	0.0914681	-0.148231	-0.522033	-0.445691	-0.256277	-0.373028	-0.447278	-0.400323	-0.218378	-0.684919	-0.306599	0.351626	-0.389221	-0.359489	0.545265	-0.216193	-0.0470831	0.181891	0.503683	-0.183691	-0.435525	-0.463932
TCGA-RC-A7SH-01	-0.202752	-0.383918	-0.269254	-0.280227	-0.252812	-0.197964	0.00501858	0.0483363	-0.0862352	-0.429225	-0.261171	0.0640369	-0.205643	0.196569	-0.299958	-0.413727	0.300104	-0.432304	-0.272022	-0.443042	-0.179494	-0.107743	0.262141	-0.242902	0.00355744	-0.451047	0.557517	0.104084	-0.464948	-0.0394423	-0.416859	-0.368135	-0.161116	-0.22751	-0.130772	-0.442161	-0.735775	-0.379448	-0.728335	-0.109531	-0.359913	-0.730299	-0.633972	-0.0338335	-0.695208	-0.579194	-0.052166	-0.173877	-0.076086
TCGA-RC-A7SK-01	-0.292739	0.290466	-0.394612	0.0329027	-0.189699	-0.0801191	-0.0225036	-0.0349373	-0.143717	-0.00376015	0.0109384	0.048642	-0.371919	-0.173001	-0.472608	-0.448967	-0.435452	0.112359	0.390553	-0.0835196	-0.364835	0.0768747	-0.0187177	-0.109234	0.158958	-0.306637	-0.241028	0.102361	0.0736861	0.074444	-0.343877	-0.381155	-0.0862737	-0.0072536	-0.0863753	0.193349	0.330799	0.165661	0.444626	-0.199208	-0.153232	0.503127	0.451937	-0.167349	0.317238	0.23781	0.321034	-0.18249	-0.0930974
TCGA-RG-A7D4-01	-0.0464623	-0.433041	-0.38617	-0.467767	-0.050698	-0.436114	-0.0700292	-0.232591	-0.228181	-0.329717	-0.273336	-0.130104	-0.358142	-0.382398	-0.394591	-0.344945	0.0691429	-0.291682	-0.116316	0.289026	0.0817754	0.501366	-0.252266	-0.284665	-0.0778814	-0.50708	-0.435314	-0.00511297	-0.405946	-0.0925228	0.276463	0.61186	-0.33804	-0.327832	-0.380875	-0.361167	-0.580253	-0.206692	-0.471041	-0.339905	-0.460812	-0.532355	-0.439818	-0.168911	-0.659078	-0.410276	-0.11325	0.000879707	0.0648169
TCGA-T1-A6J8-01	0.0605245	0.332254	0.395917	0.299526	0.0694903	0.223565	0.0648527	-0.0464359	-0.0837522	0.18316	0.0803982	-0.117998	-0.0630141	0.299804	0.347519	0.118957	-0.178723	0.0256335	0.0328704	0.449467	-0.146128	-0.21325	-0.0698287	0.27623	0.221711	-0.187544	0.0134178	-0.109164	0.423556	0.381712	-0.295094	-0.418814	0.206637	0.369415	0.265991	0.499312	0.728138	0.5484	0.697244	0.347694	0.471745	0.634132	0.487375	-0.0315745	0.279416	0.538685	0.397658	-0.03713	-0.116552
TCGA-UB-A7MA-01	0.0668635	0.0239733	0.106877	-0.0361055	0.217126	-0.338922	0.363363	-0.0236876	0.0175561	-0.160863	-0.445029	-0.321597	0.135084	0.0983032	0.334893	-0.130282	-0.203288	-0.34448	-0.48928	0.441826	0.263211	0.457366	0.103613	0.142475	-0.160019	-0.315979	0.148572	-0.17864	-0.425083	0.284442	-0.390191	-0.0846881	0.246151	0.212954	0.279393	-0.480125	-0.457839	-0.324647	-0.578388	-0.248567	-0.194447	-0.613078	-0.687654	-0.655177	-0.842669	-0.531474	-0.410731	0.18214	0.161017
TCGA-UB-A7MB-01	0.298168	0.232607	-0.44298	-0.0167303	-0.0609626	0.193143	0.31695	-0.104014	-0.24949	-0.279002	-0.237469	-0.18206	0.0575159	0.206439	0.113554	-0.543857	0.241171	0.201512	0.381079	0.30674	0.13924	0.489436	-0.059343	0.00252015	-0.198487	-0.334376	0.584	0.260821	-0.0673389	0.0354037	-0.107981	-0.590824	-0.24928	-0.15718	-0.199528	0.269366	0.541133	0.356312	0.245947	0.28087	0.205132	0.181223	0.26573	0.295899	0.268175	0.278445	-0.0588355	0.157881	0.309708
TCGA-UB-A7MC-01	-0.0852501	-0.0156293	-0.168126	-0.261516	-0.433946	-0.189633	0.385998	-0.123999	-0.256523	-0.277119	0.0234043	-0.166919	-0.173597	-0.424514	-0.266335	-0.511282	0.330854	0.0776982	-0.267644	0.302861	0.409654	0.555921	0.197217	-0.133336	-0.3791	-0.371814	0.338054	-0.109725	-0.383415	-0.236737	-0.393451	-0.585252	-0.316114	-0.144877	-0.315658	-0.264203	-0.158416	-0.173795	0.291473	-0.174046	-0.298931	0.409543	-0.0716963	0.186125	0.0300391	0.0797353	-0.335861	0.0140141	0.177847
TCGA-UB-A7MD-01	0.362336	0.554838	0.375158	0.431981	0.21497	0.084646	0.0461129	0.180275	0.155163	0.1648	0.0166869	0.0529918	0.268987	-0.0645311	0.411576	0.553992	0.00819866	0.421179	-0.180292	0.251872	0.303523	0.0291162	0.30852	0.444199	0.0349601	0.103097	0.50644	-0.210228	0.0849137	0.302064	0.339331	0.332218	0.130408	0.178753	0.110202	0.35253	0.172204	0.492147	0.555637	0.344747	0.148115	0.570103	-0.0141676	-0.497616	0.598897	0.360436	0.174918	0.222736	0.279106
TCGA-UB-A7ME-01	0.0621976	0.133291	-0.0898185	-0.293109	-0.135501	-0.264414	-0.145181	0.0231068	0.0639941	0.112349	0.19815	0.11959	0.0676239	-0.165772	0.0619464	-0.312723	-0.178278	-0.464031	-0.441974	0.228884	-0.136751	0.358077	0.156108	0.0663075	0.0328379	-0.515062	0.0530622	0.248476	-0.213778	0.261116	0.522831	0.594849	0.144151	0.269362	0.231987	-0.270436	-0.0609291	-0.307222	-0.558686	0.173177	-0.140718	-0.642684	-0.0421366	0.60583	-0.446298	-0.570538	-0.321704	-0.0866261	-0.135131
TCGA-UB-A7MF-01	-0.197648	-0.21826	0.0272824	-0.419664	0.00840592	-0.268779	-0.315267	-0.0239364	0.109311	-0.150564	-0.173732	0.194023	0.129211	-0.0500588	0.0928921	0.140061	0.375242	-0.179541	0.30285	0.0694205	0.148382	-0.132382	0.106166	0.125294	0.227506	0.0543713	-0.0777475	0.127211	0.161304	-0.0697082	0.176824	0.636214	-0.267556	-0.420109	-0.206066	0.240906	0.546865	0.242783	-0.349759	0.335557	0.0221418	-0.29535	-0.0128667	0.568034	-0.649301	-0.187534	0.390357	0.0109537	0.0522651
TCGA-UB-AA0U-01	0.290926	0.438854	0.353339	0.353818	0.487013	0.109586	0.436467	0.150253	0.322977	0.299958	0.368641	0.243557	0.410103	0.368622	0.0492309	-0.0106577	-0.246687	0.0175676	0.496306	-0.00698185	0.0692501	0.44977	0.186129	0.329878	-0.2635	0.0520103	0.421949	0.232671	0.20297	0.256983	0.231615	0.346344	0.344852	0.34681	0.386293	0.0768376	-0.00512268	-0.198552	0.0790195	0.160289	0.12294	-0.0459422	0.240183	-0.0119192	0.140215	0.0404712	-0.497545	0.277976	0.209054
TCGA-UB-AA0V-01	-0.446544	-0.634882	0.498863	-0.164082	-0.00909748	0.153937	-0.504952	-0.091272	-0.0439252	0.188556	0.360153	0.0299568	0.00506251	0.141775	-0.28187	-0.407143	-0.398489	0.350072	0.190278	-0.622182	-0.386656	-0.460563	-0.407364	-0.496326	-0.100955	0.126632	0.231535	0.375223	0.256286	-0.107811	-0.357425	-0.0582863	0.429686	0.353288	0.490049	0.267616	-0.0388579	-0.11188	0.17227	-0.0940804	-0.0649177	0.318255	0.62845	-0.531186	0.602496	0.260333	-0.553417	-0.138916	-0.439974
TCGA-WJ-A86L-01	-0.1842	-0.565636	-0.309505	-0.478479	-0.300747	-0.117139	-0.210934	-0.183735	-0.194927	-0.392681	-0.321018	0.0420548	0.0870679	0.0392174	-0.296651	-0.372547	0.358916	-0.389117	-0.224301	-0.691119	-0.422583	-0.463926	-0.125896	-0.414043	-0.391652	-0.48899	0.163974	0.2668	-0.619409	-0.330442	-0.232008	-0.375137	-0.392643	-0.423584	-0.396041	-0.528332	-0.770132	-0.470361	-0.430738	-0.432581	-0.515629	-0.329215	-0.592427	0.238301	-0.520331	-0.317945	-0.550945	-0.457311	-0.485991
TCGA-WQ-A9G7-01	-0.415157	-0.422121	-0.143477	-0.283125	-0.414162	-0.242721	-0.433949	-0.157269	-0.24495	-0.309619	-0.45447	-0.477016	-0.224494	0.134332	-0.241787	-0.347356	0.0131763	-0.484789	-0.527006	-0.356726	-0.0597922	-0.347079	-0.133567	-0.157973	0.22206	-0.501	-0.435408	0.28863	0.0160428	0.165672	-0.392763	-0.463982	0.0174043	-0.087458	0.0275915	-0.471286	-0.636386	-0.340026	-0.588018	-0.243833	-0.433134	-0.599012	-0.675339	-0.341534	-0.676641	-0.462819	0.169315	-0.171453	-0.121294
TCGA-WQ-AB4B-01	-0.645786	-0.49503	-0.0587936	-0.574839	-0.38737	-0.0717853	-0.625138	-0.0252167	-0.0816181	0.446722	0.492573	0.327562	-0.520309	-0.0239677	0.1479	-0.0465233	-0.532567	-0.379625	-0.344363	-0.565223	-0.434305	-0.673665	-0.161171	-0.421217	0.452236	-0.300349	-0.636305	-0.0287056	-0.0975388	-0.300165	-0.0767349	-0.445568	-0.0396045	-0.270129	-0.0683036	-0.10509	-0.376257	-0.340554	-0.123238	-0.463026	-0.393582	-0.131516	0.212746	0.0725695	0.392423	0.40377	0.460476	-0.358284	-0.36091
TCGA-WX-AA44-01	0.249399	0.338215	-0.049146	-0.201619	0.450871	0.0321853	0.113936	0.348308	0.232969	0.0505402	0.0263658	0.32743	0.138952	0.545847	0.224837	0.169531	0.334219	0.0939635	0.206965	0.041167	-0.0643578	0.31388	0.4355	0.297313	0.14626	0.00358836	0.491631	0.308634	-0.170739	0.192106	-0.359992	0.310801	0.392693	0.190514	0.370884	-0.358793	-0.493001	-0.135501	0.26807	0.0778706	-0.0264972	0.219509	-0.440319	0.178774	-0.469683	0.0111824	-0.240901	0.126675	0.169848
TCGA-WX-AA46-01	-0.549815	-0.680893	-0.135071	-0.208913	-0.535415	-0.0291857	-0.555687	-0.303287	-0.227276	0.23387	0.42706	0.179612	-0.313866	-0.265554	-0.735695	-0.605583	-0.366229	0.250957	0.0804618	-0.562361	-0.435383	-0.67063	-0.528325	-0.556935	-0.359762	-0.15297	0.109118	-0.104448	-0.0426111	-0.175164	-0.419421	-0.530079	-0.100116	-0.21062	-0.0478255	0.278437	0.146284	-0.177492	0.487147	-0.386623	-0.173732	0.541747	0.667285	-0.57351	0.79211	0.333751	-0.481963	-0.339059	-0.46048
TCGA-WX-AA47-01	-0.650585	-0.523505	-0.306333	-0.369301	-0.725158	-0.391727	-0.698715	-0.372329	-0.11245	-0.313989	-0.215339	-0.0887317	-0.447309	-0.494399	-0.279069	-0.552123	-0.426353	-0.103125	-0.678481	-0.449973	-0.594363	-0.732159	-0.630661	-0.593496	0.414354	-0.363145	-0.556155	-0.058921	0.0611852	-0.478764	0.0762868	-0.686688	-0.323839	-0.266557	-0.262595	-0.121646	-0.284985	-0.235807	-0.386024	-0.280996	-0.487286	-0.334608	-0.450743	-0.722173	-0.462767	-0.220661	0.456716	-0.391169	-0.501986
TCGA-XR-A8TC-01	-0.213482	0.55345	-0.0211844	0.10394	-0.299961	0.126886	0.248854	-0.0280118	-0.00721138	-0.196158	-0.0146449	0.0818203	0.260673	0.0711418	-0.171692	-0.248788	0.535422	-0.18283	-0.099671	-0.132953	0.267771	0.488423	-0.0978436	-0.0869814	-0.0564414	-0.0310582	0.365154	0.189972	0.220535	-0.0642186	-0.378814	-0.498843	-0.0306561	0.0584458	0.0411684	-0.102309	0.0906615	-0.381552	-0.449666	-0.299838	-0.0952681	-0.438507	-0.0813903	0.395166	-0.229216	-0.240873	-0.216126	-0.0026072	-0.162811
TCGA-XR-A8TD-01	-0.349144	0.025143	0.140543	0.00051434	0.0430844	0.30628	-0.425373	0.0428975	0.0753676	-0.150646	-0.406131	0.0262605	0.00224906	-0.0453701	0.342693	0.163199	0.434991	-0.114693	-0.055781	-0.511439	-0.0204271	-0.37362	-0.142655	0.231536	0.304683	-0.0856045	0.408215	0.309676	0.0962254	0.34289	0.144754	0.628901	0.340722	0.149819	0.367768	0.317369	0.0328509	0.246802	0.0691133	0.198097	0.319535	-0.136413	-0.120057	0.408497	-0.266813	-0.073952	0.228046	0.083944	-0.133054
TCGA-XR-A8TE-01	-0.0109959	0.495226	-0.104002	0.403001	0.243006	0.0441613	0.0779247	0.17797	0.0590531	-0.118604	0.0687894	0.144276	0.318906	0.0696511	-0.304594	0.0972846	0.115204	-0.0607839	-0.0453095	0.18934	0.36188	-0.151817	-0.0240236	0.105699	-0.320732	0.442716	0.666725	0.0746123	-0.188338	-0.12705	0.0332039	-0.392047	0.295229	0.333815	0.219916	-0.167549	-0.210628	-0.208798	-0.394315	-0.242139	-0.216149	-0.283056	0.13915	0.567938	-0.145164	-0.203128	-0.587152	-0.0471827	-0.164651
TCGA-XR-A8TF-01	-0.501739	-0.625564	-0.379886	-0.462658	-0.242903	-0.0915051	-0.289949	-0.0470295	-0.25241	0.016579	0.25435	-0.196028	-0.218681	-0.172846	-0.502262	-0.498613	0.23033	-0.272937	-0.304238	0.133286	0.373962	-0.29882	-0.243855	-0.484598	-0.283907	-0.574662	-0.149725	0.0549543	-0.10935	-0.466217	-0.387256	-0.442579	-0.396275	-0.230391	-0.450008	-0.263116	0.0989896	-0.213828	-0.430974	-0.417405	-0.145216	-0.383496	0.24572	-0.328135	0.27924	-0.122312	0.080027	-0.143107	0.138854
TCGA-XR-A8TG-01	0.324983	0.21942	0.0825694	-0.0706378	0.325587	-0.119793	0.224525	-0.19583	-0.0810018	-0.0249228	0.196234	0.0379619	-0.0299299	0.0952601	-0.0851986	-0.171305	-0.223069	0.288208	0.381241	0.108842	0.0569007	0.285332	0.0445869	-0.206937	-0.364364	-0.0635936	0.617948	-0.382059	-0.307887	0.0947385	0.192576	-0.429051	0.185025	0.199764	0.173564	0.00378069	-0.0802849	-0.327542	0.0272177	0.175648	-0.200635	0.121317	-0.0748617	0.0953023	0.0559544	0.0521679	-0.533155	-0.0768317	0.0657884
TCGA-YA-A8S7-01	0.0957946	0.435546	0.0752791	0.130058	0.320305	-0.232143	-0.174922	0.00529907	-0.118854	-0.267334	-0.503847	-0.334691	0.215306	-0.0639655	0.482893	0.53267	-0.124306	-0.214007	-0.518144	0.390376	0.354213	0.287754	0.340704	0.447464	-0.237572	-0.353747	0.125624	0.109062	-0.601903	0.340674	0.227262	0.311009	0.278326	0.0391001	0.240094	-0.361639	-0.448366	0.149898	-0.302287	0.0379763	-0.121123	-0.439514	-0.758392	-0.640026	-0.707534	-0.466248	-0.374649	0.225677	0.335143
TCGA-ZP-A9CV-01	0.546281	0.555633	0.436798	0.44348	-0.0580096	0.39861	0.488518	0.417372	0.403476	0.43147	0.530374	0.471942	0.290762	-0.031945	-0.0088755	0.326439	0.0946946	0.447588	0.471897	0.575549	0.32619	0.316565	0.505662	0.418719	-0.274613	0.128304	0.331118	0.0402748	0.255422	0.163862	0.127654	0.531195	0.186968	0.121806	0.154585	0.287187	0.699686	0.0315391	0.414005	0.216878	0.217887	0.531363	0.566909	0.0943223	0.255582	0.372825	-0.182716	0.263154	0.212906
TCGA-ZP-A9CY-01	-0.00793926	0.335955	0.544389	0.484334	0.0763029	0.367927	0.0440091	0.131932	0.406051	0.496138	0.560116	0.470794	0.292607	0.32	0.166048	0.269117	0.00973951	0.527787	0.227959	-0.440697	-0.0786471	-0.475054	-0.204771	0.255869	-0.382734	0.594353	-0.137286	0.208133	0.285527	-0.122131	-0.171801	-0.171753	0.227401	0.257415	0.291992	0.490684	0.346319	0.0698782	0.559489	0.0464198	0.340676	0.58434	0.746081	0.0127766	0.550342	0.494943	-0.440448	-0.090265	-0.23604
TCGA-ZP-A9CZ-01	0.227527	0.405673	0.132167	0.0505167	0.176713	0.319823	0.357773	0.0873631	0.218165	0.184809	-0.032572	0.0362163	0.338115	0.191865	0.347659	-0.116969	0.284573	0.12547	0.529446	0.319743	0.272505	0.568436	0.199116	0.207796	0.202	0.187991	0.129046	0.247484	0.350887	0.18718	0.115775	0.623164	0.301865	0.295505	0.349164	0.456371	0.476027	0.192473	0.20827	0.414454	0.234358	0.322606	0.218177	0.586848	0.269389	0.145986	0.0772017	0.264583	0.350392
TCGA-ZP-A9D0-01	-0.14384	0.386834	0.305172	0.0451851	-0.0524077	0.00955233	-0.21142	0.147674	0.127236	0.119667	0.21832	0.303104	-0.0774451	-0.340547	-0.496479	-0.128507	0.0128541	0.165288	0.26816	0.305031	0.209574	-0.261211	-0.104436	-0.0555534	0.0873969	0.147701	0.175993	0.294598	0.389313	-0.279782	-0.1098	-0.617575	-0.0354895	-0.00330748	0.0464419	0.295528	0.563188	0.194311	0.322518	0.0446424	-0.0641493	0.300966	0.521493	-0.029188	0.447843	0.297919	0.226082	-0.118708	-0.269888
TCGA-ZP-A9D1-01	0.175692	0.0359628	0.298312	-0.149307	-0.134478	0.142964	-0.231249	0.151588	0.238484	0.048007	0.221224	0.209976	0.059652	0.150512	0.449296	-0.0567838	0.227618	0.274228	-0.394704	0.273987	0.21685	0.0662322	0.164053	-0.044764	0.0814075	0.0835805	0.263158	-0.0404213	0.14254	0.284988	-0.203224	0.232859	0.365414	0.286331	0.401266	-0.0809032	0.241117	-0.0611142	0.124029	-0.1107	0.0523287	0.166138	-0.203569	-0.456017	-0.158179	0.217634	-0.101821	0.0545573	-0.152453
TCGA-ZP-A9D2-01	0.558661	0.346351	0.291522	0.208563	0.403954	-0.214061	0.592305	0.23442	0.285171	-0.3606	-0.386241	-0.174659	0.306495	0.303351	0.251399	0.245252	0.222907	0.146093	-0.00385845	0.517406	0.563826	0.574845	0.616595	0.519195	-0.357607	-0.300812	0.523971	0.227129	-0.280732	0.508953	-0.514439	0.311629	0.204891	0.362402	0.228265	-0.468175	-0.210424	-0.328723	-0.233296	-0.0607241	-0.0918406	-0.307285	-0.709517	-0.424937	-0.72777	-0.332218	-0.3936	0.343622	0.323616
TCGA-ZP-A9D4-01	-0.31991	-0.131803	-0.420216	-0.465387	-0.500325	-0.285697	-0.322578	-0.296326	-0.356908	-0.231032	0.00504872	-0.257602	-0.207886	-0.532198	-0.320693	-0.361119	-0.480325	0.00467891	-0.193682	-0.493945	0.0638803	-0.29793	-0.262124	-0.388382	-0.463211	-0.103745	0.193615	0.025758	-0.324493	-0.48538	-0.278259	-0.571217	-0.436284	-0.356633	-0.444748	-0.143104	-0.139161	-0.209439	0.432225	-0.377971	-0.426409	0.510688	0.398247	-0.172813	0.645717	0.38106	-0.400591	-0.412875	-0.366292
TCGA-ZS-A9CD-01	-0.0636693	-0.277379	-0.017552	0.0421807	0.15252	0.311867	-0.413428	0.307477	0.297208	0.374702	0.488593	0.448257	-0.261112	0.250855	0.43452	0.3481	-0.0581028	0.0290224	0.178932	0.0429388	-0.296532	-0.643215	0.0566339	0.0193753	0.218541	0.198399	-0.0174605	-0.0914508	0.48814	0.0622459	-0.106673	-0.00160565	0.301256	0.106922	0.255053	0.230454	0.366649	0.270628	0.249703	0.265156	0.244338	0.360489	0.461665	0.316052	0.479945	0.480374	0.0678415	-0.0125496	-0.0229216
TCGA-ZS-A9CE-01	0.0702125	-0.0306208	-0.363279	-0.142734	-0.366808	-0.0924058	0.0673775	-0.374199	-0.217722	-0.00259281	0.178537	0.0444387	-0.0758674	-0.401504	-0.398103	-0.486491	-0.409641	0.0419103	0.00162251	-0.474323	-0.42513	-0.369899	-0.154416	-0.286021	-0.139698	0.303893	-0.122104	-0.0849802	-0.189674	-0.38445	-0.223298	-0.621326	-0.47993	-0.473311	-0.436075	0.260321	0.103447	0.133329	0.286826	-0.054544	0.146396	0.32799	0.408319	0.12405	0.493527	0.356812	0.093453	-0.289113	-0.285883
[truncated: 2 more rows]
[truncated: 137 more columns]

## Sheet: Table S10
Table S10 The result of single sample gene set enrichment analysis in the Meta-cohort.
[truncated: 366 more rows]

[truncated: 9 more sheets: Table S11, Table S12, Table S13, Table S14, Table S15, Table S16, Table S17, Table S18, Table S19]
